# Supplementary material for: PAIP1 regulates expression of immune and inflammatory response associated genes at transcript level in liver cancer cell
Source: PeerJ. 2023 Apr 21;11:e15070. doi: 10.7717/peerj.15070 (PMC10124545; doi:10.7717/peerj.15070)
Supplement: Supplemental Information 1 [file peerj-11-15070-s001.xlsx]

## Sheet: Table S1
Table S1 Information of siRNA used in this study
Lable	sense (5'-3')	antisense (5'-3')
siNC	UUCUCCGAACGUGUCACGUTT	ACGUGACACGUUCGGAGAATT
si-1	GUGAGGAUUAUCCUACUCUTT	AGAGUAGGAUAAUCCUCACTT
si-2	CGCCUGUGUAAUUACCUGUTT	ACAGGUAAUUACACAGGCGTT
si-3	GAUCCAUACUUGGAUGAUATT	UAUCAUCCAAGUAUGGAUCTT
