# Supplementary material for: PAIP1 regulates expression of immune and inflammatory response associated genes at transcript level in liver cancer cell
Source: PeerJ. 2023 Apr 21;11:e15070. doi: 10.7717/peerj.15070 (PMC10124545; doi:10.7717/peerj.15070)
Supplement: Supplemental Information 2 [file peerj-11-15070-s002.xlsx]

## Sheet: Table S2
Table S2. Primers that were used for qPCR
Gene name	Forward primers	Reverse primers
GAPDH	GGTCGGAGTCAACGGATTTG	GGAAGATGGTGATGGGATTTC
PAIP1	GCTGATCCAGATTACCAAGA	GGTCCATCTCATCATCAATATC
COL9A2	CTGGCATAGACCTCAGTCATTG	GCATCATTCGGCTGTTACCAA
HAMP	ATGTTCCAGAGGCGAAGG	CAGGTAGGTTCTACGTCTTG
DKK1	CGTTGTTACTGTGGAGAAGGT	TGGAAGGTGTTATTGGAATGCT
CCND1	GCGTTGTACCTGTAGGACTCT	GTGAGCTGGCTTCATTGAGATT
APOC3	AAGACTACTGGAGCACCGTTA	AGGAGAGCACTGAGAATACTGT
IL1R2	GACCACTCACTTACTCGTA	GCGTAGCTCAATACTCCTA
MYCN	TCCTCCACCTCACCTCCAT	AGGCGGATGTGTCAATGGT
MICAL1	GGGTAAGGTTAAGGGAGGACAA	CCACACCAAGTGAGAATAGCAT
IL1RN	GGAGAGCCCTTCATTTGGAGA	AGTGCCTGGACAGAGGAGT
CDKN2A	AATGGACATTTACGGTAGTGGG	CTCTGAGAAACCTCGGGAAAC
IL18	GCTAGAAAGTATCCTTCGTATG	GAATCCTCCTGATAACATCAAG
TPM4	AGTCCAATTCAGGTCAGCCATA	GAAGTCAAACAAAGCCGATACG
PTAFR	GGAGTTAGCACAGAAGCACTT	GGAAGATACGCATAGCAAGGC
AKR1C1	CAGTCCTTTGTGCCTTGG	TGCTCATTGTAGCTCTTGG
PLA2G2A	TAGGGTAGGGAGGGAGGGTA	TGTGAGTGTGATAAGGCTGCT
MT1F	CGACTGATGCCAGGACAAC	AGGAATGTAGCAAATGGGTCAA
SERPINA3	GTCCATAAGGCTGTGCTTGAT	GGTCCTTGTCTCCACTAATGC
CCL14	TGTCTCTGAGCTGTGCCTTC	GCCATTCCGTCTGTACCAAC
