# Supplementary material for: PAIP1 regulates expression of immune and inflammatory response associated genes at transcript level in liver cancer cell
Source: PeerJ. 2023 Apr 21;11:e15070. doi: 10.7717/peerj.15070 (PMC10124545; doi:10.7717/peerj.15070)
Supplement: Supplemental Information 3 [file peerj-11-15070-s003.xlsx]

## Sheet: Table S3
Table S3. Summary of sample names, description, the RNA-seq sequencing information and mapping results in each sample
Sample	Description	Total clean reads	Total mapped	Total Uniquely mapped	Total Multiple mapped
siPAIP1_1st	PAIP1_Knockdown_1	75122916	72987378(97.16%)	70364547(96.41%)	2622831(3.59%)
siPAIP1_2nd	PAIP1_Knockdown_2	77477286	75245728(97.12%)	71139197(94.54%)	4106531(5.46%)
siPAIP1_3rd	PAIP1_Knockdown_3	85073064	82246802(96.68%)	67508041(82.08%)	14738761(17.92%)
Ctrl_1st	control_1	76897598	74860327(97.35%)	72125547(96.35%)	2734780(3.65%)
Ctrl_2nd	control_2	80337082	77775499(96.81%)	71730420(92.23%)	6045079(7.77%)
Ctrl_3rd	control_3	68809456	66863784(97.17%)	64506219(96.47%)	2357565(3.53%)
