# Supplementary material for: PAIP1 regulates expression of immune and inflammatory response associated genes at transcript level in liver cancer cell
Source: PeerJ. 2023 Apr 21;11:e15070. doi: 10.7717/peerj.15070 (PMC10124545; doi:10.7717/peerj.15070)
Supplement: Supplemental Information 4 [file peerj-11-15070-s004.xlsx]

## Sheet: Table S4
Table S4. Gene expression level (FPKM).
Gene	Ctrl_1st	Ctrl_2nd	Ctrl_3rd	siPAIP1_1st	siPAIP1_2nd	siPAIP1_3rd	Symbol	Chr	GeneType	Description
ENSG00000237851.1	0	0	0.07	0	0	0	RP1-67K17.4	chr6	lincRNA	--
ENSG00000164054.15	56.87	57.31	61.05	62.29	67.23	53.74	SHISA5	chr3	protein_coding	shisa family member 5
ENSG00000257527.1	2.17	1.68	1.21	2.22	2.45	1	MIR3179-3	chr16	lincRNA	microRNA 3179-3
ENSG00000140830.8	5.73	5.73	6.16	4.7	4.8	4.13	TXNL4B	chr16	protein_coding	thioredoxin-like 4B
ENSG00000180613.10	0	0.01	0	0.03	0	0	GSX2	chr4	protein_coding	GS homeobox 2
ENSG00000225193.5	0	0.07	0	0	0	0.57	RPS12P26	chr15	transcribed_processed_pseudogene	ribosomal protein S12 pseudogene 26
ENSG00000204444.10	23.54	19.71	20.85	12.51	12.43	11.48	APOM	chr6	protein_coding	apolipoprotein M
ENSG00000228477.1	0	0	0.04	0	0.04	0	RP3-342P20.2	chr1	processed_pseudogene	--
ENSG00000235927.4	0.07	0.04	0.01	0.07	0.12	0.02	NEXN-AS1	chr1	antisense	NEXN antisense RNA 1
ENSG00000163249.9	7.75	7.29	7.79	8.9	8.89	7.13	CCNYL1	chr2	protein_coding	cyclin Y-like 1
ENSG00000265808.3	9.2	8.07	8.67	8.81	8.74	6.75	SEC22B	chr1	protein_coding	SEC22 vesicle trafficking protein homolog B (S. cerevisiae) (gene/pseudogene)
ENSG00000272370.1	0.63	0.47	0.52	0.43	0.84	0.22	RP11-307L14.1	chr5	lincRNA	--
ENSG00000197008.9	1.59	1.58	1.46	1.89	1.88	1.52	ZNF138	chr7	protein_coding	zinc finger protein 138
ENSG00000180881.19	0	0	0.01	0	0	0	CAPS2	chr12	protein_coding	calcyphosine 2
ENSG00000163904.12	5.48	5.29	5.37	5.87	5.34	4.57	SENP2	chr3	protein_coding	SUMO1/sentrin/SMT3 specific peptidase 2
ENSG00000135638.13	0.36	0.3	0.34	0.3	0.42	0.33	EMX1	chr2	protein_coding	empty spiracles homeobox 1
ENSG00000185710.9	0.02	0.01	0.01	0.03	0.02	0.15	SMG1P4	chr16	transcribed_unprocessed_pseudogene	SMG1 pseudogene 4
ENSG00000254673.1	11.82	9.84	10.94	13.46	13.05	8.81	RP11-598P20.5	chr8	protein_coding	--
ENSG00000100603.13	25.57	23.26	23.07	28.68	28.05	23.32	SNW1	chr14	protein_coding	SNW domain containing 1
ENSG00000165480.15	7.02	6.7	6.95	7.21	7.16	4.91	SKA3	chr13	protein_coding	spindle and kinetochore associated complex subunit 3
ENSG00000223861.1	0.05	0.05	0	0	0	0.11	RP11-74C1.2	chr1	processed_pseudogene	--
ENSG00000009413.15	2.39	2.54	2.35	2.04	2.1	2.32	REV3L	chr6	protein_coding	REV3-like, polymerase (DNA directed), zeta, catalytic subunit
ENSG00000236056.1	0	0.14	0.22	0.09	0	0.03	GAPDHP14	chr21	processed_pseudogene	glyceraldehyde-3-phosphate dehydrogenase pseudogene 14
ENSG00000227001.3	0.32	0.16	0.27	0.12	0.33	0.39	NBPF2P	chr1	unprocessed_pseudogene	neuroblastoma breakpoint family, member 2, pseudogene
ENSG00000224186.8	1.19	1.37	1.27	1.1	1.12	1.17	C5orf66	chr5	antisense	chromosome 5 open reading frame 66
ENSG00000184988.8	3.67	4.26	3.71	3.79	3.9	6.42	TMEM106A	chr17	protein_coding	transmembrane protein 106A
ENSG00000261118.1	0.33	0.26	0.14	0.39	0.26	0.27	RP11-104N10.1	chr16	antisense	--
ENSG00000087274.16	27.99	27.69	28.48	30.69	31.01	32.65	ADD1	chr4	protein_coding	adducin 1 (alpha)
ENSG00000251569.1	0.08	0.12	0.05	0.08	0.11	0.07	RP11-724O16.1	chr2	protein_coding	--
ENSG00000269711.1	25.09	19.44	26.74	36.63	35.79	33.65	CTD-3214H19.16	chr19	protein_coding	--
ENSG00000280409.1	1.24	1.14	1.32	1.37	1.37	1.31	LINC01101	chr2	TEC	long intergenic non-protein coding RNA 1101
ENSG00000226996.5	0	0.03	0	0	0	0	AP000477.3	chr21	lincRNA	--
ENSG00000173976.15	0.01	0.02	0	0.01	0	0	RAX2	chr19	protein_coding	retina and anterior neural fold homeobox 2
ENSG00000123405.13	0.36	0.31	0.56	0.32	0.3	0.28	NFE2	chr12	protein_coding	nuclear factor, erythroid 2
ENSG00000094880.10	8.05	8.06	7.84	9.32	8.95	6.68	CDC23	chr5	protein_coding	cell division cycle 23
ENSG00000106624.8	0.01	0.03	0.01	0.03	0.01	0.09	AEBP1	chr7	protein_coding	AE binding protein 1
ENSG00000273712.1	0	0	0.11	0	0	0.1	RP5-874C20.7	chr6	processed_pseudogene	--
ENSG00000197467.13	0.04	0.01	0.01	0.04	0.07	0.01	COL13A1	chr10	protein_coding	collagen, type XIII, alpha 1
ENSG00000163626.16	2.99	2.69	2.68	2.86	2.84	3.11	COX18	chr4	protein_coding	COX18 cytochrome c oxidase assembly factor
ENSG00000111775.2	358.37	293.34	378.36	366.35	368.25	293.24	COX6A1	chr12	protein_coding	cytochrome c oxidase subunit VIa polypeptide 1
ENSG00000265675.2	0	0	0	0	0.27	0.1	RN7SL708P	chr19	misc_RNA	RNA, 7SL, cytoplasmic 708, pseudogene
ENSG00000248787.1	0	0	0	0	0	0.07	RP11-666A20.4	chr3	lincRNA	--
ENSG00000171962.17	0.02	0.02	0.07	0.04	0.08	0.05	LRRC48	chr17	protein_coding	leucine rich repeat containing 48
ENSG00000259318.1	0	0.09	0.1	0	0.18	0.48	RP11-454L9.2	chr14	processed_pseudogene	--
ENSG00000133106.14	0.04	0.03	0.01	0.02	0.07	0.03	EPSTI1	chr13	protein_coding	epithelial stromal interaction 1 (breast)
ENSG00000243081.2	0.02	0.05	0.02	0.02	0.02	0.11	RP11-231E6.1	chr3	lincRNA	--
ENSG00000168874.12	1.89	1.93	2.56	1.07	1.35	1.13	ATOH8	chr2	protein_coding	atonal homolog 8 (Drosophila)
ENSG00000255428.1	0.02	0.03	0.03	0.03	0	0.03	RP11-794P6.1	chr11	sense_intronic	--
ENSG00000242536.1	0	0.04	0	0	0	0	RP11-290K4.2	chr3	lincRNA	--
ENSG00000131323.14	1.83	1.8	1.95	2.76	2.67	3.47	TRAF3	chr14	protein_coding	TNF receptor-associated factor 3
ENSG00000271774.1	0	0	0	0	0.04	0.12	RP4-678D15.1	chr20	antisense	--
ENSG00000105993.14	26.23	24.78	26.35	25.99	27.5	21.56	DNAJB6	chr7	protein_coding	DnaJ (Hsp40) homolog, subfamily B, member 6
ENSG00000112195.8	0	0	0.01	0	0	0	TREML2	chr6	protein_coding	triggering receptor expressed on myeloid cells-like 2
ENSG00000107959.15	20.96	22.15	22.3	22.86	22.5	18.75	PITRM1	chr10	protein_coding	pitrilysin metallopeptidase 1
ENSG00000166589.12	0.12	0.05	0.12	0.08	0.03	0.07	CDH16	chr16	protein_coding	cadherin 16, KSP-cadherin
ENSG00000268975.1	2.94	2.81	3.89	3.41	3.82	2.48	MIA-RAB4B	chr19	protein_coding	MIA-RAB4B readthrough (NMD candidate)
ENSG00000237886.1	0.15	0.15	0.14	0.15	0.07	0.31	LINC01573	chr9	antisense	long intergenic non-protein coding RNA 1573
ENSG00000025293.15	4.38	4.55	4.38	5.04	5.08	5.66	PHF20	chr20	protein_coding	PHD finger protein 20
ENSG00000105229.6	7.86	8.46	8.7	8.55	8.25	9.78	PIAS4	chr19	protein_coding	protein inhibitor of activated STAT, 4
ENSG00000070950.9	2.67	2.56	2.75	2.75	3.03	2.21	RAD18	chr3	protein_coding	RAD18 E3 ubiquitin protein ligase
ENSG00000006016.10	99.1	106.83	103.99	145.42	158.81	142.27	CRLF1	chr19	protein_coding	cytokine receptor-like factor 1
ENSG00000260803.1	0	0	0	0	0	0.15	Z84812.4	chr16	processed_transcript	--
ENSG00000178096.8	2.76	2.34	2.57	2.82	3.13	2.39	BOLA1	chr1	protein_coding	bolA family member 1
ENSG00000198898.12	11.3	10.78	11.91	12.67	12.35	9.7	CAPZA2	chr7	protein_coding	capping protein (actin filament) muscle Z-line, alpha 2
ENSG00000278272.1	0.78	0.91	1.09	0.8	2.31	2.42	HIST1H3C	chr6	protein_coding	histone cluster 1, H3c
ENSG00000276747.1	0.01	0.01	0.01	0.01	0.02	0	PADI6	chr1	protein_coding	peptidyl arginine deiminase, type VI
ENSG00000188636.3	0	0	0.01	0	0	0	LDOC1L	chr22	protein_coding	leucine zipper, down-regulated in cancer 1-like
ENSG00000259205.2	0.1	0.07	0	0.05	0.1	0.2	PRKXP1	chr15	processed_pseudogene	protein kinase, X-linked, pseudogene 1
ENSG00000107902.13	10.67	10.9	11.51	9.57	10.56	7.91	LHPP	chr10	protein_coding	phospholysine phosphohistidine inorganic pyrophosphate phosphatase
ENSG00000254469.7	0.08	0.19	0.16	0.24	0.11	0.38	RP11-849H4.2	chr11	protein_coding	--
ENSG00000137078.8	2.12	2.32	2.84	0.74	1.25	0.92	SIT1	chr9	protein_coding	signaling threshold regulating transmembrane adaptor 1
ENSG00000183208.12	0.63	0.61	0.61	0.62	0.65	1.01	GDPGP1	chr15	protein_coding	GDP-D-glucose phosphorylase 1
ENSG00000187812.12	0	0	0	0.01	0	0.01	RP11-24M17.5	chr15	transcribed_unprocessed_pseudogene	--
ENSG00000167157.10	0.02	0	0.07	0	0.02	0	PRRX2	chr9	protein_coding	paired related homeobox 2
ENSG00000111196.9	5.96	4.91	4.49	5.06	5.33	4.29	MAGOHB	chr12	protein_coding	mago-nashi homolog B (Drosophila)
ENSG00000260625.2	0.08	0.04	0.09	0.33	0.17	0.13	RP11-452L6.7	chr16	antisense	--
ENSG00000165953.9	0	0	0	0	0	0.01	SERPINA12	chr14	protein_coding	serpin peptidase inhibitor, clade A (alpha-1 antiproteinase, antitrypsin), member 12
ENSG00000264546.1	0.08	0.16	0	0	0.05	0.52	RP11-464D20.6	chr17	sense_intronic	--
ENSG00000240521.1	0	0	0	0	0	0.06	RP11-680B3.2	chr3	antisense	--
ENSG00000163481.7	17.04	14.56	17.73	17.25	17.29	14.24	RNF25	chr2	protein_coding	ring finger protein 25
ENSG00000257359.1	0	0.05	0.05	0	0.05	0.1	RP11-780K2.1	chr12	antisense	--
ENSG00000087077.11	0.08	0.05	0.1	0.1	0.12	0.24	TRIP6	chr7	protein_coding	thyroid hormone receptor interactor 6
ENSG00000164530.13	0	0.01	0	0	0	0	PI16	chr6	protein_coding	peptidase inhibitor 16
ENSG00000160785.13	7.95	8.66	7.69	8.08	7.71	6.52	SLC25A44	chr1	protein_coding	solute carrier family 25, member 44
ENSG00000115165.9	0	0.02	0	0	0	0	CYTIP	chr2	protein_coding	cytohesin 1 interacting protein
ENSG00000104549.11	34.59	34.72	32.53	23.82	22.56	17.71	SQLE	chr8	protein_coding	squalene epoxidase
ENSG00000273674.4	0	0	0.06	0.02	0.05	0.01	CTD-2378E12.1	chr15	lincRNA	--
ENSG00000155428.12	1.37	1.51	1.26	1.04	1.2	1.43	TRIM74	chr7	protein_coding	tripartite motif containing 74
ENSG00000147324.10	6.55	6.67	6.17	7.43	7.75	6.95	MFHAS1	chr8	protein_coding	malignant fibrous histiocytoma amplified sequence 1
ENSG00000204469.12	20.5	25.75	21.26	21.2	21.14	45.74	PRRC2A	chr6	protein_coding	proline-rich coiled-coil 2A
ENSG00000180279.5	0	0.03	0	0.06	0.14	0.06	MGC45922	chr19	lincRNA	--
ENSG00000172264.16	0.02	0.02	0.02	0.03	0.01	0.02	MACROD2	chr20	protein_coding	MACRO domain containing 2
ENSG00000185129.5	0.96	0.93	0.99	1.16	1.28	1.1	PURA	chr5	protein_coding	purine-rich element binding protein A
ENSG00000231888.1	0	0	0	0	0.08	0	MTND5P15	chr3	processed_pseudogene	MT-ND5 pseudogene 15
ENSG00000260345.1	1.17	1.26	1.5	2.11	1.64	0.76	AC009052.12	chr16	processed_transcript	--
ENSG00000166401.13	1.47	1.58	2.04	2.06	2.3	1.87	SERPINB8	chr18	protein_coding	serpin peptidase inhibitor, clade B (ovalbumin), member 8
ENSG00000279474.1	0	0.02	0	0.03	0.01	0.07	CTD-2286N8.1	chr18	TEC	--
ENSG00000205212.3	0.13	0.16	0.2	0.2	0.13	0.15	CCDC144NL	chr17	protein_coding	coiled-coil domain containing 144 family, N-terminal like
ENSG00000135960.9	0	0	0.01	0	0	0	EDAR	chr2	protein_coding	ectodysplasin A receptor
ENSG00000129103.17	44.71	44.09	44.65	54.78	57.4	47.81	SUMF2	chr7	protein_coding	sulfatase modifying factor 2
ENSG00000169679.14	16.03	15.29	15.23	20.15	19.95	15.2	BUB1	chr2	protein_coding	BUB1 mitotic checkpoint serine/threonine kinase
ENSG00000272034.1	4.71	3.53	4.27	2.41	4.47	3.13	SNORD14A	chr11	snoRNA	small nucleolar RNA, C/D box 14A
ENSG00000200972.1	0	0	0.26	0.24	0.48	0.25	RNU5A-8P	chr1	snRNA	RNA, U5A small nuclear 8, pseudogene
ENSG00000008710.17	0.98	1.45	1.28	1	1.06	3.83	PKD1	chr16	protein_coding	polycystic kidney disease 1 (autosomal dominant)
ENSG00000179091.4	102.71	93.75	112.89	105.1	97.69	80.11	CYC1	chr8	protein_coding	cytochrome c-1
ENSG00000148248.13	78.82	76.58	80.75	74.24	73.93	60.38	SURF4	chr9	protein_coding	surfeit 4
ENSG00000281593.1	0	0.04	0.04	0.04	0.08	0.04	GS1-114I9.3	chr7	protein_coding	--
ENSG00000221869.4	3.98	3.48	4.2	4.55	4.28	3.95	CEBPD	chr8	protein_coding	CCAAT/enhancer binding protein (C/EBP), delta
ENSG00000228643.1	0	0.14	0.15	0	0	0.15	AC079779.4	chr2	processed_transcript	--
ENSG00000131845.14	1.01	1.1	0.99	1.16	1.46	1	ZNF304	chr19	protein_coding	zinc finger protein 304
ENSG00000227972.1	0.02	0	0	0.01	0	0.03	PRKRIRP3	chr10	processed_pseudogene	protein-kinase, interferon-inducible double stranded RNA dependent inhibitor, repressor of (P58 repressor) pseudogene 3
ENSG00000166173.10	0.25	0.3	0.42	0.27	0.39	0.35	LARP6	chr15	protein_coding	La ribonucleoprotein domain family, member 6
ENSG00000214160.9	29.36	31.41	32.74	29.09	29.65	22.9	ALG3	chr3	protein_coding	ALG3, alpha-1,3- mannosyltransferase
ENSG00000254565.1	0.03	0	0	0	0.05	0	MTND2P26	chr11	processed_pseudogene	MT-ND2 pseudogene 26
ENSG00000281551.1	0.34	0	0	0	0	0.36	snoMe28S-Am2634	chr2	snoRNA	--
ENSG00000175646.3	0	0.06	0	0	0	0.07	PRM1	chr16	protein_coding	protamine 1
ENSG00000228997.1	0.49	0.3	0.14	0.37	0.19	0.19	RP1-186E20.1	chr10	processed_pseudogene	--
ENSG00000234504.2	0.02	0	0	0	0	0	RP11-285G1.2	chr10	antisense	--
ENSG00000269564.1	0	0	0	0	0	0.07	AC008753.4	chr19	lincRNA	--
ENSG00000153044.9	17.12	13.21	13.64	17.77	18.56	15.08	CENPH	chr5	protein_coding	centromere protein H
ENSG00000196933.5	0	0	0	0.08	0.08	0	RPS26P11	chrX	processed_pseudogene	ribosomal protein S26 pseudogene 11
ENSG00000107105.14	0	0	0	0	0.01	0	ELAVL2	chr9	protein_coding	ELAV like neuron-specific RNA binding protein 2
ENSG00000179163.11	25.06	22.79	24.85	22.69	21.57	15.54	FUCA1	chr1	protein_coding	fucosidase, alpha-L- 1, tissue
ENSG00000236714.1	0.1	0.11	0.05	0.04	0.11	0.06	AC005592.1	chr5	lincRNA	--
ENSG00000259239.1	0	0	0.02	0	0.02	0	RP11-521C20.1	chr15	processed_pseudogene	--
ENSG00000177138.15	0	0.03	0	0.02	0	0.04	FAM9B	chrX	protein_coding	family with sequence similarity 9, member B
ENSG00000270255.1	0	0	0	0	0	0.09	RP11-420B22.2	chr8	processed_pseudogene	--
ENSG00000213412.3	4.01	3.39	4.64	1.12	2.08	1.57	HNRNPA1P33	chr10	processed_pseudogene	heterogeneous nuclear ribonucleoprotein A1 pseudogene 33
ENSG00000177294.6	0	0	0	0	0	0.02	FBXO39	chr17	protein_coding	F-box protein 39
ENSG00000257270.1	0.12	0.06	0.13	0	0	0.19	RP11-521B24.5	chr14	antisense	--
ENSG00000111667.13	27.99	26.56	29.3	34.77	32.9	35.97	USP5	chr12	protein_coding	ubiquitin specific peptidase 5 (isopeptidase T)
ENSG00000237338.1	0.05	0.05	0	0	0.05	0	FTCD-AS1	chr21	antisense	FTCD antisense RNA 1
ENSG00000117411.16	30.86	27.8	30.32	31.42	30.53	26.61	B4GALT2	chr1	protein_coding	UDP-Gal:betaGlcNAc beta 1,4- galactosyltransferase, polypeptide 2
ENSG00000200218.1	0	0.25	0	0	0	0	RNU6-697P	chr10	snRNA	RNA, U6 small nuclear 697, pseudogene
ENSG00000278919.1	0.55	0.53	0.56	1.1	0.54	0.93	AP006285.2	chr11	protein_coding	--
ENSG00000164715.5	3.17	3.72	3.17	2.84	3.3	4.75	LMTK2	chr7	protein_coding	lemur tyrosine kinase 2
ENSG00000261045.2	0	0	0.04	0	0	0	RP11-673P17.4	chr16	lincRNA	--
ENSG00000264007.1	0	0	0	0	0	0.13	RP11-68I3.10	chr17	sense_intronic	--
ENSG00000244122.2	0.05	0	0.01	0.02	0.01	0	UGT1A7	chr2	protein_coding	UDP glucuronosyltransferase 1 family, polypeptide A7
ENSG00000166743.9	0.6	0.48	0.58	0.57	0.53	0.4	ACSM1	chr16	protein_coding	acyl-CoA synthetase medium-chain family member 1
ENSG00000165671.18	0	0	0	0.01	0	0	NSD1	chr5	protein_coding	nuclear receptor binding SET domain protein 1
ENSG00000268797.1	0	0.05	0	0	0	0	CTC-490E21.12	chr19	protein_coding	--
ENSG00000186184.15	32.87	29.34	33.65	31.97	31.85	24.4	POLR1D	chr13	protein_coding	polymerase (RNA) I polypeptide D, 16kDa
ENSG00000158773.14	9.81	9.77	10.38	10.17	9.89	9.11	USF1	chr1	protein_coding	upstream transcription factor 1
ENSG00000275727.1	0	0.25	0.27	0.25	0.25	0	AC092375.1	chr16	miRNA	--
ENSG00000257831.1	0	0.03	0	0.03	0	0	RP11-596D21.1	chr14	antisense	--
ENSG00000177614.9	0.02	0.02	0.03	0.01	0.01	0.01	PGBD5	chr1	protein_coding	piggyBac transposable element derived 5
ENSG00000080561.13	0.07	0.04	0.04	0.09	0.04	0.05	MID2	chrX	protein_coding	midline 2
ENSG00000279071.1	0.01	0	0	0.03	0	0	RP11-83B20.3	chr12	TEC	--
ENSG00000263986.1	0.05	0.16	0.12	0.16	0.05	0.17	RP11-746M1.1	chr17	antisense	--
ENSG00000275410.4	5.42	5.54	5.46	3.65	3.46	2.98	HNF1B	chr17	protein_coding	HNF1 homeobox B
ENSG00000175745.11	2.76	2.8	2.74	3.08	3.07	2.74	NR2F1	chr5	protein_coding	nuclear receptor subfamily 2, group F, member 1
ENSG00000196826.7	0.01	0.01	0.01	0	0.01	0.01	CTD-2192J16.17	chr19	protein_coding	--
ENSG00000200345.2	0	0	0	0	0	0.27	RNU6-485P	chr12	snRNA	RNA, U6 small nuclear 485, pseudogene
ENSG00000230772.1	0.1	0.19	0.18	0.2	0.26	0.31	VN1R108P	chr20	unprocessed_pseudogene	vomeronasal 1 receptor 108 pseudogene
ENSG00000265521.1	0.34	0	0	0	0	0.36	MIR5697	chr1	miRNA	microRNA 5697
ENSG00000236274.1	0	0	0	0	0.03	0	RP4-728D4.3	chr1	processed_pseudogene	--
ENSG00000260619.1	0	0	0	0	0	0.02	RP11-775C24.3	chr15	lincRNA	--
ENSG00000135636.13	0.03	0.01	0	0.02	0.01	0.04	DYSF	chr2	protein_coding	dysferlin
ENSG00000271717.1	0	0.23	0	0.08	0	0.08	CTD-3020H12.4	chr19	antisense	--
ENSG00000127554.12	20.19	17.22	20.74	19.45	19.96	19.73	GFER	chr16	protein_coding	growth factor, augmenter of liver regeneration
ENSG00000273036.2	2.92	4.61	3.63	3.2	3.98	4.58	FAM95C	chr9	lincRNA	family with sequence similarity 95, member C
ENSG00000138172.10	0.61	0.37	0.55	0.45	0.5	0.48	CALHM2	chr10	protein_coding	calcium homeostasis modulator 2
ENSG00000165533.18	1.53	1.52	1.63	1.84	1.97	1.22	TTC8	chr14	protein_coding	tetratricopeptide repeat domain 8
ENSG00000166803.10	30.99	29.24	30.65	35.59	34.77	29.41	KIAA0101	chr15	protein_coding	KIAA0101
ENSG00000159182.4	0	0	0	0	0	0.07	PRAC1	chr17	protein_coding	prostate cancer susceptibility candidate 1
ENSG00000234769.7	0.67	0.54	0.41	0.55	0.44	0.46	WASH4P	chr16	unprocessed_pseudogene	WAS protein family homolog 4 pseudogene
ENSG00000251435.1	0	0.05	0	0.05	0.02	0.03	C1GALT1P2	chr5	processed_pseudogene	ore 1 synthase, glycoprotein-N-acetylgalactosamine 3-beta-galactosyltransferase 1 pseudogene 2
ENSG00000186998.15	0.01	0.02	0	0.01	0.1	0.04	EMID1	chr22	protein_coding	EMI domain containing 1
ENSG00000148356.13	4.8	5.12	5.68	5.82	5.97	8.44	LRSAM1	chr9	protein_coding	leucine rich repeat and sterile alpha motif containing 1
ENSG00000202198.1	13.43	14.89	8.58	11.34	48.81	148.72	RN7SK	chr6	misc_RNA	RNA, 7SK small nuclear
ENSG00000184956.15	0	0	0	0	0	0.01	MUC6	chr11	protein_coding	mucin 6, oligomeric mucus/gel-forming
ENSG00000100401.19	31.1	30.57	34.3	37.92	38.51	55.48	RANGAP1	chr22	protein_coding	Ran GTPase activating protein 1
ENSG00000263529.2	0.09	0	0	0	0	0	RN7SL122P	chr1	misc_RNA	RNA, 7SL, cytoplasmic 122, pseudogene
ENSG00000244538.1	0	0	0	0	0.11	0	RP11-10G12.1	chr4	processed_pseudogene	--
ENSG00000126266.3	0	0	0.04	0.01	0.01	0.07	FFAR1	chr19	protein_coding	free fatty acid receptor 1
ENSG00000176115.9	0	0	0.03	0.11	0	0.03	AQP7P4	chr9	unprocessed_pseudogene	aquaporin 7 pseudogene 4
ENSG00000267504.1	0	0.02	0	0	0	0.13	RP11-845C23.2	chr18	sense_intronic	--
ENSG00000129083.12	26.63	23.83	26.24	28.57	29.13	19.49	COPB1	chr11	protein_coding	coatomer protein complex, subunit beta 1
ENSG00000144036.14	2.01	2.03	2.16	2.23	2.63	2.19	EXOC6B	chr2	protein_coding	exocyst complex component 6B
ENSG00000078967.12	4.71	4.1	5.01	4.63	4.21	3.29	UBE2D4	chr7	protein_coding	ubiquitin-conjugating enzyme E2D 4 (putative)
ENSG00000104976.11	10.19	10.88	10.84	10.63	11.64	9.02	SNAPC2	chr19	protein_coding	small nuclear RNA activating complex, polypeptide 2, 45kDa
ENSG00000223634.1	0	0	0	0.05	0	0	AC012506.3	chr2	lincRNA	--
ENSG00000170089.15	0.12	0.15	0.1	0.06	0.02	0.15	RP11-423H2.1	chr5	transcribed_unprocessed_pseudogene	--
ENSG00000224786.1	0.11	0	0	0.06	0	0	CETN4P	chr4	unitary_pseudogene	centrin EF-hand protein 4, pseudogene
ENSG00000266124.1	0	0	0	0	0	2.68	MIR5587	chr16	miRNA	microRNA 5587
ENSG00000075043.17	0	0	0	0	0.01	0.01	KCNQ2	chr20	protein_coding	potassium channel, voltage gated KQT-like subfamily Q, member 2
ENSG00000258538.5	0	0.09	0.15	0	0.04	0	RP11-753D20.3	chr14	lincRNA	--
ENSG00000112062.10	12.88	12.28	12.26	12.1	11.92	9.3	MAPK14	chr6	protein_coding	mitogen-activated protein kinase 14
ENSG00000245748.1	0.01	0.01	0.01	0.01	0.01	0	RP11-367J11.2	chr4	antisense	--
ENSG00000175701.10	8.28	6.58	7.99	8.56	8.38	7.05	LINC00116	chr2	protein_coding	long intergenic non-protein coding RNA 116
ENSG00000261783.1	2.43	3.01	2.88	2.27	2.17	3.2	RP11-252K23.2	chr16	sense_intronic	--
ENSG00000188032.9	0.04	0.08	0.06	0.06	0.06	0.14	C19orf67	chr19	protein_coding	chromosome 19 open reading frame 67
ENSG00000068001.13	16.75	15.54	18.94	19.69	20.4	17.08	HYAL2	chr3	protein_coding	hyaluronoglucosaminidase 2
ENSG00000226758.1	0.04	0.07	0.04	0	0	0.07	DISC1-IT1	chr1	sense_intronic	DISC1 intronic transcript 1
ENSG00000269894.1	0.34	0.48	0.65	0.54	0.44	0.77	RP11-1020A11.1	chr3	sense_intronic	--
ENSG00000267203.1	0	0	0.13	0	0	0	SNRPGP4	chr17	processed_pseudogene	small nuclear ribonucleoprotein polypeptide G pseudogene 4
ENSG00000213411.2	0.01	0.12	0.02	0.02	0.07	0	RBM22P2	chr13	processed_pseudogene	RNA binding motif protein 22 pseudogene 2
ENSG00000166025.17	0.01	0.02	0.01	0.03	0.05	0.03	AMOTL1	chr11	protein_coding	angiomotin like 1
ENSG00000230797.2	0.3	0.45	0.32	0.33	0.32	0.5	YY2	chrX	protein_coding	YY2 transcription factor
ENSG00000276178.1	0	0	0	0	0	0.28	Y_RNA	chr7	misc_RNA	--
ENSG00000143375.14	1.01	1.28	1.01	0.86	1.09	2.31	CGN	chr1	protein_coding	cingulin
ENSG00000161328.10	0.98	0.94	0.89	0.59	0.86	1.23	LRRC56	chr11	protein_coding	leucine rich repeat containing 56
ENSG00000125851.9	0.02	0.01	0.01	0.02	0.01	0.01	PCSK2	chr20	protein_coding	proprotein convertase subtilisin/kexin type 2
ENSG00000254100.1	0.2	0.2	0.17	0.36	0.25	0.16	RP11-675F6.4	chr8	lincRNA	--
ENSG00000211683.3	2.49	3.3	2.75	2.92	2.59	2.57	KB-1572G7.3	chr22	processed_transcript	--
ENSG00000229057.1	0.4	0.88	0.16	0.26	0.52	0.5	RPS3AP54	chr9	processed_pseudogene	ribosomal protein S3a pseudogene 54
ENSG00000204569.9	7.71	8.38	8.19	8.55	8.9	10.58	PPP1R10	chr6	protein_coding	protein phosphatase 1, regulatory subunit 10
ENSG00000261396.1	0.05	0	0	0	0	0	CTD-2012K14.2	chr16	antisense	--
ENSG00000163995.18	0.03	0.03	0.03	0.04	0.04	0.05	ABLIM2	chr4	protein_coding	actin binding LIM protein family, member 2
ENSG00000235859.5	4.12	4.82	4.65	3.75	3.62	3	AC006978.6	chr7	processed_pseudogene	--
ENSG00000077009.13	0	0.02	0	0	0	0	NMRK2	chr19	protein_coding	nicotinamide riboside kinase 2
ENSG00000276476.2	0.03	0.03	0	0.05	0.01	0	LINC00540	chr13	lincRNA	long intergenic non-protein coding RNA 540
ENSG00000227210.1	0.54	0.2	0.39	0.25	0.4	0.53	AC079145.4	chr2	antisense	--
ENSG00000203809.5	0.7	0.14	0.26	0.38	0.28	0.45	LINC00577	chr6	lincRNA	long intergenic non-protein coding RNA 577
ENSG00000225726.1	0	0	0	0	0	0.06	AC007000.10	chr7	processed_pseudogene	--
ENSG00000228160.1	0	0	0	0	0.06	0	RP13-57D9.3	chrX	lincRNA	--
ENSG00000167644.11	0.1	0.31	0.45	0.36	0.21	0.49	C19orf33	chr19	protein_coding	chromosome 19 open reading frame 33
ENSG00000129559.12	167.26	145.22	161.31	181.64	174.23	159.67	NEDD8	chr14	protein_coding	neural precursor cell expressed, developmentally down-regulated 8
ENSG00000148655.14	4.33	4.16	4.89	4.48	4.77	4.47	C10orf11	chr10	protein_coding	chromosome 10 open reading frame 11
ENSG00000174099.10	0.02	0.02	0.01	0.04	0.02	0.06	MSRB3	chr12	protein_coding	methionine sulfoxide reductase B3
ENSG00000213188.3	0.03	0.03	0	0	0.03	0.07	YBX1P4	chr7	processed_pseudogene	Y box binding protein 1 pseudogene 4
ENSG00000250564.1	0.04	0.04	0.04	0.08	0	0	RP11-215P8.4	chr5	lincRNA	--
ENSG00000233382.6	0.34	0.21	0.44	0.19	0.3	0.28	NKAPP1	chrX	transcribed_processed_pseudogene	NFKB activating protein pseudogene 1
ENSG00000214253.8	54.1	44.72	56.95	64.99	61.89	52.53	FIS1	chr7	protein_coding	fission 1 (mitochondrial outer membrane) homolog (S. cerevisiae)
ENSG00000259402.1	0.1	0.31	0.11	0	0.05	0.32	RP11-30K9.4	chr15	sense_intronic	--
ENSG00000281856.1	0	0	0	0.02	0	0	RP11-744A16.4	chr17	lincRNA	--
ENSG00000274225.1	0.5	0.5	0.37	0.3	0.34	0.57	KB-68A7.1	chr21	lincRNA	--
ENSG00000099260.10	6.42	5.51	6.57	6.55	5.83	5.7	PALMD	chr1	protein_coding	palmdelphin
ENSG00000213015.8	11.66	12.91	12.75	11.29	10.95	9.23	ZNF580	chr19	protein_coding	zinc finger protein 580
ENSG00000232352.1	1.35	1.51	2.74	1.78	1.2	1.52	SEMA3B-AS1	chr3	antisense	SEMA3B antisense RNA 1 (head to head)
ENSG00000230747.1	0.14	0.11	0.08	0.15	0.04	0.08	AC021188.4	chr2	antisense	--
ENSG00000215375.6	2.45	1.86	2.11	2.54	2.83	3.76	MYL5	chr4	protein_coding	myosin, light chain 5, regulatory
ENSG00000227355.1	0.06	0.06	0.07	0.06	0.18	0.32	RP11-162D16.2	chr9	antisense	--
ENSG00000267283.1	0.53	0.57	0.95	0.54	1.03	0.69	AC005306.3	chr19	processed_transcript	--
ENSG00000279357.1	0.05	0.11	0.06	0	0.05	0.06	RP11-475D10.4	chr16	TEC	--
ENSG00000158669.11	12.02	11.67	12.11	10.5	9.95	11.56	AGPAT6	chr8	protein_coding	1-acylglycerol-3-phosphate O-acyltransferase 6
ENSG00000168122.4	0.01	0	0.03	0	0	0	ZNF355P	chr21	unprocessed_pseudogene	zinc finger protein 355, pseudogene
ENSG00000261537.1	0.03	0.1	0.3	0	0.07	0	RP11-319G9.5	chr16	sense_intronic	--
ENSG00000215455.4	0	0	0	0	0	0.02	KRTAP10-1	chr21	protein_coding	keratin associated protein 10-1
ENSG00000088986.10	130.44	105.87	122.25	127.41	126.13	103.74	DYNLL1	chr12	protein_coding	dynein, light chain, LC8-type 1
ENSG00000249516.1	0	0	0	0	0	0.05	CTD-2201E18.2	chr5	processed_pseudogene	--
ENSG00000273444.1	0	0	0.18	0	0.16	0	RP5-1147A1.2	chr7	unprocessed_pseudogene	--
ENSG00000167165.18	1.84	1.66	1.89	1.08	1.11	0.61	UGT1A6	chr2	protein_coding	UDP glucuronosyltransferase 1 family, polypeptide A6
ENSG00000013441.15	13.88	14.54	14.32	13.78	14.33	9.25	CLK1	chr2	protein_coding	CDC-like kinase 1
ENSG00000198843.12	22.11	18.86	21.92	20.29	19.99	14.89	SELT	chr3	protein_coding	--
ENSG00000118004.17	2.38	2.34	2.52	3.34	3.21	3.01	COLEC11	chr2	protein_coding	collectin sub-family member 11
ENSG00000243954.3	0.09	0.27	0.4	0.09	0.09	0.48	RN7SL743P	chr16	misc_RNA	RNA, 7SL, cytoplasmic 743, pseudogene
ENSG00000144579.7	47.15	47.99	49.24	47	43.35	42.18	CTDSP1	chr2	protein_coding	CTD (carboxy-terminal domain, RNA polymerase II, polypeptide A) small phosphatase 1
ENSG00000260583.1	0.34	0.14	0.27	0.3	0.29	0.05	AP000223.42	chr21	antisense	--
ENSG00000169814.12	7.11	6.29	8.15	5.17	5.14	3.58	BTD	chr3	protein_coding	biotinidase
ENSG00000276890.1	0	0.09	0	0.1	0.1	0.2	Metazoa_SRP	chr3	misc_RNA	--
ENSG00000106714.17	0.2	0.29	0.25	0.17	0.2	0.25	CNTNAP3	chr9	protein_coding	contactin associated protein-like 3
ENSG00000268053.1	0	0.01	0	0	0	0.01	CTC-344H19.6	chr19	processed_pseudogene	--
ENSG00000034713.7	29.88	27.51	30.29	30.95	32.16	24.26	GABARAPL2	chr16	protein_coding	GABA(A) receptor-associated protein-like 2
ENSG00000261402.1	0.01	0.01	0.02	0.01	0	0	RP11-378I6.1	chr9	lincRNA	--
ENSG00000166326.6	4.56	4.81	4.42	5.68	5.65	6.81	TRIM44	chr11	protein_coding	tripartite motif containing 44
ENSG00000276093.1	0	0.05	0	0	0	0	RP5-1017F8.2	chr20	lincRNA	--
ENSG00000237273.1	0.05	0.16	0	0.11	0.06	0.23	RSL24D1P8	chr19	processed_pseudogene	ribosomal L24 domain containing 1 pseudogene 8
ENSG00000259459.5	0	0.01	0	0	0	0	RP11-321G12.1	chr15	lincRNA	--
ENSG00000260274.1	1.1	1.05	0.92	1.63	1.4	1.43	RP11-817O13.8	chr15	lincRNA	--
ENSG00000184986.10	0.26	0.32	0.42	0.68	0.85	0.72	TMEM121	chr14	protein_coding	transmembrane protein 121
ENSG00000172339.9	2.46	2.12	2.35	2.11	2.26	1.64	ALG14	chr1	protein_coding	ALG14, UDP-N-acetylglucosaminyltransferase subunit
ENSG00000230753.5	0	0.21	0.23	0.09	0.38	0.18	ZNF341-AS1	chr20	antisense	ZNF341 antisense RNA 1
ENSG00000270523.1	0	0	0.08	0.15	0	0	RP11-145P16.3	chr15	sense_intronic	--
ENSG00000219409.2	0	0	0	0	0	0.04	RP11-106E7.1	chr6	processed_pseudogene	--
ENSG00000166159.10	0.01	0.01	0	0.01	0.01	0.01	LRTM2	chr12	protein_coding	leucine-rich repeats and transmembrane domains 2
ENSG00000257058.1	0.07	0.07	0	0.07	0.07	0	RP11-864I4.4	chr11	antisense	--
ENSG00000274879.1	0	0	0	0	0.15	0.16	RP11-411G2.1	chr12	processed_pseudogene	--
ENSG00000148346.11	0.49	0.28	0.23	0.34	0.36	0.19	LCN2	chr9	protein_coding	lipocalin 2
ENSG00000048707.13	1.42	1.49	1.44	1.43	1.44	3.12	VPS13D	chr1	protein_coding	vacuolar protein sorting 13 homolog D (S. cerevisiae)
ENSG00000176978.13	0.88	0.93	0.73	0.83	0.55	0.57	DPP7	chr9	protein_coding	dipeptidyl-peptidase 7
ENSG00000275805.1	0	0	0.04	0.02	0	0	RP11-349H17.2	chr18	sense_intronic	--
ENSG00000237757.2	0	0.18	0.02	0.04	0.02	0.02	EEF1A1P30	chrX	processed_pseudogene	eukaryotic translation elongation factor 1 alpha 1 pseudogene 30
ENSG00000244378.1	0.03	0.02	0.04	0	0.02	0	RPS2P45	chr16	transcribed_processed_pseudogene	ribosomal protein S2 pseudogene 45
ENSG00000196357.11	0.61	0.47	0.61	0.58	0.48	0.54	ZNF565	chr19	protein_coding	zinc finger protein 565
ENSG00000280240.1	0.11	0.29	0.05	0.07	0.07	0.24	AL049794.1	chr20	protein_coding	--
ENSG00000136197.12	2.18	1.77	2.3	2.88	3.09	2.39	C7orf25	chr7	protein_coding	chromosome 7 open reading frame 25
ENSG00000206341.7	3.88	3.66	3.3	4.8	4.8	3.22	HLA-H	chr6	unprocessed_pseudogene	major histocompatibility complex, class I, H (pseudogene)
ENSG00000261519.3	0.08	0.03	0.02	0.03	0.04	0	RP11-403P17.4	chr16	lincRNA	--
ENSG00000021488.12	3.54	4.03	2.98	2.27	2.55	2.53	SLC7A9	chr19	protein_coding	solute carrier family 7 (amino acid transporter light chain, bo,+ system), member 9
ENSG00000138395.14	0.01	0	0	0	0	0	CDK15	chr2	protein_coding	cyclin-dependent kinase 15
ENSG00000129946.10	5.14	5.49	6.62	6.67	8.48	8.1	SHC2	chr19	protein_coding	SHC (Src homology 2 domain containing) transforming protein 2
ENSG00000118564.14	5.06	4.57	4.71	5.2	5.42	4.05	FBXL5	chr4	protein_coding	F-box and leucine-rich repeat protein 5
ENSG00000015568.12	0.01	0.02	0.02	0.02	0.02	0.01	RGPD5	chr2	protein_coding	RANBP2-like and GRIP domain containing 5
ENSG00000229083.1	0	0.04	0	0.08	0	0	PSMA6P2	chrX	processed_pseudogene	proteasome (prosome, macropain) subunit, alpha type, 6 pseudogene 2
ENSG00000276071.1	0.06	0.02	0.05	0	0.04	0.13	CTD-3234P18.6	chr19	lincRNA	--
ENSG00000196584.2	1.07	1.23	0.85	1.15	0.92	3.02	XRCC2	chr7	protein_coding	X-ray repair complementing defective repair in Chinese hamster cells 2
ENSG00000135446.16	87.46	73.55	88.6	104.6	99.78	77.53	CDK4	chr12	protein_coding	cyclin-dependent kinase 4
ENSG00000205209.7	0	0.04	0	0.01	0	0.01	SCGB2B2	chr19	protein_coding	secretoglobin, family 2B, member 2
ENSG00000108559.11	12.99	11.33	12.23	15.45	14.65	10.23	NUP88	chr17	protein_coding	nucleoporin 88kDa
ENSG00000144635.8	16.67	14.39	15.95	18.79	17.7	12.74	DYNC1LI1	chr3	protein_coding	dynein, cytoplasmic 1, light intermediate chain 1
ENSG00000167553.14	215	196.24	225.88	276.14	276.27	216.86	TUBA1C	chr12	protein_coding	tubulin, alpha 1c
ENSG00000225399.4	0	0.02	0.05	0	0	0	RP11-3B7.1	chr3	lincRNA	--
ENSG00000137700.16	16.22	15.79	17.11	14.56	14	12.69	SLC37A4	chr11	protein_coding	solute carrier family 37 (glucose-6-phosphate transporter), member 4
ENSG00000167216.16	0.01	0	0.02	0.01	0.02	0.01	KATNAL2	chr18	protein_coding	katanin p60 subunit A-like 2
ENSG00000221286.1	0	0	0	0	0	0.3	AC092289.1	chr16	miRNA	--
ENSG00000100242.15	19.3	20.67	19.99	21.91	21.08	29.12	SUN2	chr22	protein_coding	Sad1 and UNC84 domain containing 2
ENSG00000224531.5	4.68	4.38	4.72	4.42	5.08	3.32	SMIM13	chr6	protein_coding	small integral membrane protein 13
ENSG00000113013.12	100.41	92.41	96.1	105.72	103.42	77.94	HSPA9	chr5	protein_coding	heat shock 70kDa protein 9 (mortalin)
ENSG00000177963.12	16.54	15.85	17.72	17.12	16.61	16.17	RIC8A	chr11	protein_coding	RIC8 guanine nucleotide exchange factor A
ENSG00000008226.19	0.05	0.07	0.07	0.06	0.07	0.07	DLEC1	chr3	protein_coding	deleted in lung and esophageal cancer 1
ENSG00000165092.12	315.65	284.22	329.82	256.35	238.39	177.97	ALDH1A1	chr9	protein_coding	aldehyde dehydrogenase 1 family, member A1
ENSG00000160505.15	0	0	0	0	0.01	0.01	NLRP4	chr19	protein_coding	NLR family, pyrin domain containing 4
ENSG00000125124.11	8.66	8	9.01	10.46	9.92	8.09	BBS2	chr16	protein_coding	Bardet-Biedl syndrome 2
ENSG00000201600.1	0	0	0	0	0	0.08	RN7SKP124	chr3	misc_RNA	RNA, 7SK small nuclear pseudogene 124
ENSG00000265711.1	0	0.27	0	0	0.28	0.87	AL049871.1	chr14	miRNA	--
ENSG00000066032.18	0	0	0	0.01	0	0	CTNNA2	chr2	protein_coding	catenin (cadherin-associated protein), alpha 2
ENSG00000260691.5	0	0.01	0	0	0	0	ANKRD20A1	chr9	protein_coding	ankyrin repeat domain 20 family, member A1
ENSG00000264346.1	1.71	3.21	1.67	2.41	1.73	3.64	SNORA77	chr22	snoRNA	small nucleolar RNA, H/ACA box 77
ENSG00000166866.12	0.93	1.07	0.9	1.08	1.04	1.83	MYO1A	chr12	protein_coding	myosin IA
ENSG00000197580.11	0.1	0.08	0.03	0.09	0.07	0.05	BCO2	chr11	protein_coding	beta-carotene oxygenase 2
ENSG00000159479.16	38.82	32.68	37.98	37.35	37.62	27.04	MED8	chr1	protein_coding	mediator complex subunit 8
ENSG00000236753.5	0.75	0.67	0.54	0.74	0.9	0.49	MKLN1-AS	chr7	processed_transcript	MKLN1 antisense RNA
ENSG00000109113.17	0.3	0.18	0.19	0.34	0.31	0.34	RAB34	chr17	protein_coding	RAB34, member RAS oncogene family
ENSG00000054654.15	0.39	0.49	0.38	0.4	0.54	1.91	SYNE2	chr14	protein_coding	spectrin repeat containing, nuclear envelope 2
ENSG00000134996.11	26.86	24.48	28.62	26.92	25.3	20.28	OSTF1	chr9	protein_coding	osteoclast stimulating factor 1
ENSG00000265982.1	1.95	3.91	3.43	4.28	4.52	4.15	RP11-927P21.4	chr17	unprocessed_pseudogene	--
ENSG00000266965.1	0	0	0.05	0	0	0.17	RP11-712P20.2	chr18	sense_intronic	--
ENSG00000180773.14	1.09	1.14	1.09	1.2	1.15	0.82	SLC36A4	chr11	protein_coding	solute carrier family 36 (proton/amino acid symporter), member 4
ENSG00000229893.2	0.02	0	0.05	0	0	0	AC004549.6	chr7	antisense	--
ENSG00000109339.18	0	0	0.01	0	0	0	MAPK10	chr4	protein_coding	mitogen-activated protein kinase 10
ENSG00000262343.1	0.08	0	0	0	0	0	RP11-353N14.3	chr17	lincRNA	--
ENSG00000185386.14	0.58	0.78	0.61	2.1	2.06	2.55	MAPK11	chr22	protein_coding	mitogen-activated protein kinase 11
ENSG00000118680.12	284.59	238.21	291.27	274.46	270.61	203.51	MYL12B	chr18	protein_coding	myosin, light chain 12B, regulatory
ENSG00000259887.1	0	0	0	0	0.06	0	RP11-923I11.5	chr12	lincRNA	--
ENSG00000229344.1	1.18	0.9	0.7	0.84	0.79	0.92	RP5-857K21.7	chr1	unprocessed_pseudogene	--
ENSG00000185049.12	8.78	9.73	9.01	9.22	10.09	9.75	NELFA	chr4	protein_coding	negative elongation factor complex member A
ENSG00000133863.6	0.01	0.02	0.02	0.03	0.05	0.03	TEX15	chr8	protein_coding	testis expressed 15
ENSG00000279686.1	0.21	0.27	0.3	0.05	0.08	0.06	ECSCR	chr5	protein_coding	endothelial cell surface expressed chemotaxis and apoptosis regulator
ENSG00000212658.1	0	0	0	0	0.03	0	KRTAP29-1	chr17	protein_coding	keratin associated protein 29-1
ENSG00000140488.14	0.13	0.09	0.11	0.18	0.24	0.22	CELF6	chr15	protein_coding	CUGBP, Elav-like family member 6
ENSG00000237489.2	0.09	0.1	0.09	0.04	0.1	0.1	LINC00959	chr10	lincRNA	long intergenic non-protein coding RNA 959
ENSG00000279649.1	0	0.02	0	0	0.01	0.02	RP11-96D1.8	chr16	TEC	--
ENSG00000170899.10	13.93	12.97	13.14	17.36	15.4	11.47	GSTA4	chr6	protein_coding	glutathione S-transferase alpha 4
ENSG00000125734.13	14.75	14.61	16.4	15.36	15.84	14.18	GPR108	chr19	protein_coding	G protein-coupled receptor 108
ENSG00000144043.11	30.19	29.46	30.55	30.82	32.49	25.57	TEX261	chr2	protein_coding	testis expressed 261
ENSG00000135775.13	9.94	9.47	9.93	10.42	10	7.02	COG2	chr1	protein_coding	component of oligomeric golgi complex 2
ENSG00000224416.2	0	0	0	0.05	0.05	0	IFNA22P	chr9	unprocessed_pseudogene	interferon, alpha 22, pseudogene
ENSG00000268240.1	0.01	0	0.01	0.01	0	0.04	RP11-678G14.4	chr19	lincRNA	--
ENSG00000260276.2	0.78	0.83	0.88	0.51	0.7	1.08	RP11-77H9.2	chr16	antisense	--
ENSG00000095787.21	12.33	12.68	12.14	14.13	14.26	11.17	WAC	chr10	protein_coding	WW domain containing adaptor with coiled-coil
ENSG00000277918.1	0.49	0.33	0.18	0.5	0.5	2.78	U1	chr1	snRNA	--
ENSG00000270681.1	0.17	0.1	0.3	0.05	0.12	0.1	RP11-372K14.2	chr4	antisense	--
ENSG00000256050.2	0.02	0.02	0.02	0.04	0.1	0.13	RP11-982M15.6	chr14	lincRNA	--
ENSG00000232353.5	0	0.08	0.18	0	0.08	0.04	RP11-655G22.1	chr3	lincRNA	--
ENSG00000140623.13	0.02	0	0	0.02	0	0.02	2021-09-12	chr16	protein_coding	septin 12
ENSG00000100380.12	65.37	60.3	65.31	79.25	78.77	63.08	ST13	chr22	protein_coding	suppression of tumorigenicity 13 (colon carcinoma) (Hsp70 interacting protein)
ENSG00000225331.1	0	0	0	0.03	0	0.03	AP001055.6	chr21	lincRNA	--
ENSG00000266931.1	0	0	0.21	0	0	0	RP11-1252D15.1	chr2	unprocessed_pseudogene	--
ENSG00000118640.10	142.28	120.07	152.39	133.44	138.54	110.16	VAMP8	chr2	protein_coding	vesicle-associated membrane protein 8
ENSG00000221333.1	0	0.23	0	0	0	0.25	MIR548K	chr11	miRNA	microRNA 548k
ENSG00000104714.13	5.37	5.34	5.02	5.31	5.92	7.83	ERICH1	chr8	protein_coding	glutamate-rich 1
ENSG00000064961.18	30.25	30.55	31.88	39.89	40.15	36.26	HMG20B	chr19	protein_coding	high mobility group 20B
ENSG00000113070.7	1.37	1.18	1.52	1.6	1.7	1.22	HBEGF	chr5	protein_coding	heparin-binding EGF-like growth factor
ENSG00000272335.1	1.51	1.8	1.88	1.74	1.55	1.53	RP11-53O19.3	chr5	lincRNA	--
ENSG00000101057.15	87.55	93.55	85.54	99.89	93.89	86.37	MYBL2	chr20	protein_coding	v-myb avian myeloblastosis viral oncogene homolog-like 2
ENSG00000255094.1	0	0.1	0.07	0.03	0.03	0	RP11-406D1.2	chr11	lincRNA	--
ENSG00000160188.9	0	0	0.04	0	0	0.02	RSPH1	chr21	protein_coding	radial spoke head 1 homolog (Chlamydomonas)
ENSG00000269974.1	1.28	1.42	1.22	1.01	1.22	1.09	RP11-932O9.10	chr15	lincRNA	--
ENSG00000172009.14	13.79	14.02	15.57	17.11	16.62	22.65	THOP1	chr19	protein_coding	thimet oligopeptidase 1
ENSG00000233242.2	0	0.04	0	0	0	0	RP11-220I1.2	chr9	antisense	--
ENSG00000253572.2	0.07	0.04	0	0.08	0.04	0.12	RP11-107N7.1	chr5	lincRNA	--
ENSG00000011478.11	6.45	7.04	7.48	7.25	7.09	7.44	QPCTL	chr19	protein_coding	glutaminyl-peptide cyclotransferase-like
ENSG00000167741.10	0.57	0.41	0.5	0.35	0.24	0.29	GGT6	chr17	protein_coding	gamma-glutamyltransferase 6
ENSG00000243951.1	0	0.09	0	0	0	0	RN7SL308P	chr8	misc_RNA	RNA, 7SL, cytoplasmic 308, pseudogene
ENSG00000268119.5	0	0	0	0.01	0.01	0.03	CTD-2561J22.5	chr19	processed_transcript	--
ENSG00000114656.10	0.11	0.11	0.1	0.11	0.13	0.08	KIAA1257	chr3	protein_coding	KIAA1257
ENSG00000266754.2	0.36	0.54	0.5	0.37	0.18	0.47	RN7SL524P	chr10	misc_RNA	RNA, 7SL, cytoplasmic 524, pseudogene
ENSG00000204228.3	14.88	12.71	14.07	16.19	16.13	13.59	HSD17B8	chr6	protein_coding	hydroxysteroid (17-beta) dehydrogenase 8
ENSG00000131508.15	40.39	36.47	39.14	38.15	35.79	28.67	UBE2D2	chr5	protein_coding	ubiquitin-conjugating enzyme E2D 2
ENSG00000260193.1	0.38	0.2	0.31	0.12	0.1	0.19	RP11-83N9.5	chr9	lincRNA	--
ENSG00000240108.1	0	0	0.15	0	0.07	0	NCOR1P1	chr20	transcribed_unprocessed_pseudogene	nuclear receptor corepressor 1 pseudogene 1
ENSG00000233834.6	0.04	0	0	0	0.04	0	AC005083.1	chr7	processed_transcript	--
ENSG00000203565.2	0	0	0	0	0	0.06	RP13-259N13.2	chr10	lincRNA	--
ENSG00000238825.1	0	0	0	0	0.17	0	RNU1-13P	chr1	snRNA	RNA, U1 small nuclear 13, pseudogene
ENSG00000264620.1	0	0.8	0	0	0	0	AL139022.1	chr14	miRNA	--
ENSG00000104164.10	5.77	7.64	5.31	6.91	7.23	7.99	BLOC1S6	chr15	protein_coding	biogenesis of lysosomal organelles complex-1, subunit 6, pallidin
ENSG00000198189.10	49.62	43.81	51.13	56.3	57.68	40.85	HSD17B11	chr4	protein_coding	hydroxysteroid (17-beta) dehydrogenase 11
ENSG00000108821.13	0.03	0.04	0.03	0.04	0.06	0.13	COL1A1	chr17	protein_coding	collagen, type I, alpha 1
ENSG00000126947.11	0	0	0	0.01	0	0.03	ARMCX1	chrX	protein_coding	armadillo repeat containing, X-linked 1
ENSG00000105939.12	5.46	5.81	5.44	5.54	5.25	5.14	ZC3HAV1	chr7	protein_coding	zinc finger CCCH-type, antiviral 1
ENSG00000241219.1	0	0	0	0	0	0.02	RP11-572M11.1	chr3	lincRNA	--
ENSG00000105855.9	0	0	0	0	0	0.01	ITGB8	chr7	protein_coding	integrin, beta 8
ENSG00000127124.13	0	0.01	0.01	0.01	0	0	HIVEP3	chr1	protein_coding	human immunodeficiency virus type I enhancer binding protein 3
ENSG00000110844.13	1.99	2.34	2.18	2.4	2.69	3.24	PRPF40B	chr12	protein_coding	PRP40 pre-mRNA processing factor 40 homolog B (S. cerevisiae)
ENSG00000089723.9	2.49	2.02	2.47	3.89	4.44	3.44	OTUB2	chr14	protein_coding	OTU deubiquitinase, ubiquitin aldehyde binding 2
ENSG00000213075.7	0.02	0	0.02	0	0	0	RPL31P11	chr1	transcribed_processed_pseudogene	ribosomal protein L31 pseudogene 11
ENSG00000042493.15	18.87	15.68	22.11	22.84	22.18	16.28	CAPG	chr2	protein_coding	capping protein (actin filament), gelsolin-like
ENSG00000196417.12	0.29	0.27	0.27	0.36	0.41	0.58	ZNF765	chr19	protein_coding	zinc finger protein 765
ENSG00000023318.7	9.1	8.34	8.58	9.4	9.48	7	ERP44	chr9	protein_coding	endoplasmic reticulum protein 44
ENSG00000244044.3	0	0	0	0	0	0.19	RN7SL735P	chr17	misc_RNA	RNA, 7SL, cytoplasmic 735, pseudogene
ENSG00000054690.13	0.93	1.22	0.87	1.22	1.32	2.31	PLEKHH1	chr14	protein_coding	pleckstrin homology domain containing, family H (with MyTH4 domain) member 1
ENSG00000264775.1	0.05	0.05	0	0.06	0.05	0.11	PPIAP14	chr18	processed_pseudogene	peptidylprolyl isomerase A (cyclophilin A) pseudogene 14
ENSG00000244503.1	0	0	0.11	0	0.02	0	RP11-278L15.6	chr3	processed_pseudogene	--
ENSG00000205791.3	0.26	0.37	0.29	0.6	0.53	0.33	LOH12CR2	chr12	lincRNA	loss of heterozygosity, 12, chromosomal region 2 (non-protein coding)
ENSG00000228540.1	0.1	0.1	0	0	0	0	AC073326.3	chr7	sense_intronic	--
ENSG00000264952.1	0	0.51	0	0	0.52	0	AC004000.1	chrX	miRNA	--
ENSG00000266202.1	0.05	0	0	0.09	0.14	0.05	RP1-66C13.4	chr17	protein_coding	--
ENSG00000253490.5	0	0	0	0	0	0.01	AC145110.1	chr8	lincRNA	--
ENSG00000174437.16	27.05	30.74	26.62	25.1	24.4	25.21	ATP2A2	chr12	protein_coding	ATPase, Ca++ transporting, cardiac muscle, slow twitch 2
ENSG00000135900.3	42.51	38.07	40.89	42.71	43.67	32.6	MRPL44	chr2	protein_coding	mitochondrial ribosomal protein L44
ENSG00000083814.12	0	0	0	0.01	0	0.02	ZNF671	chr19	protein_coding	zinc finger protein 671
ENSG00000227681.5	9.48	7.29	9.25	9.08	8.52	7.01	RP11-307P5.1	chr6	lincRNA	--
ENSG00000228630.5	0	0	0	0.02	0	0	HOTAIR	chr12	antisense	HOX transcript antisense RNA
ENSG00000274443.4	0.08	0	0	0	0	0	C8orf89	chr8	protein_coding	chromosome 8 open reading frame 89
ENSG00000274012.1	14.01	28.03	12.36	15.25	50.06	449.85	Metazoa_SRP	chr14	misc_RNA	--
ENSG00000250903.8	0.42	0.47	0.43	0.33	0.32	0.55	GMDS-AS1	chr6	lincRNA	GMDS antisense RNA 1 (head to head)
ENSG00000112855.14	10.42	10.23	10.62	12.18	12.81	10.52	HARS2	chr5	protein_coding	histidyl-tRNA synthetase 2, mitochondrial
ENSG00000272434.1	0.21	0	0.23	0.35	0.42	0.07	RP13-131K19.6	chr3	antisense	--
ENSG00000249395.2	0.41	0.14	0.21	0.61	0.65	0.42	CASC9	chr8	lincRNA	cancer susceptibility candidate 9 (non-protein coding)
ENSG00000268400.5	16.52	17.71	18.56	21.18	21.52	29.76	CTD-3214H19.4	chr19	protein_coding	--
ENSG00000154518.9	58.95	48.61	60.64	57.44	56.88	44.1	ATP5G3	chr2	protein_coding	ATP synthase, H+ transporting, mitochondrial Fo complex, subunit C3 (subunit 9)
ENSG00000259985.1	0.11	0.41	0.23	0.23	0.28	0.32	RP11-549B18.1	chr18	antisense	--
ENSG00000258712.2	0	0	0	0.03	0	0	CXADRP2	chr15	processed_pseudogene	coxsackie virus and adenovirus receptor pseudogene 2
ENSG00000226200.6	0.25	0.24	0.24	0.37	0.29	0.26	SGMS1-AS1	chr10	antisense	SGMS1 antisense RNA 1
ENSG00000276234.4	2.62	2.78	2.34	2.56	2.99	2.4	TADA2A	chr17	protein_coding	transcriptional adaptor 2A
ENSG00000213886.3	57.62	42.42	71.8	41.48	39.45	31.18	UBD	chr6	protein_coding	ubiquitin D
ENSG00000258172.1	0	0	0.06	0	0	0.06	RP11-1105G2.4	chr12	antisense	--
ENSG00000132141.13	0.28	0.18	0.2	0.35	0.41	0.27	CCT6B	chr17	protein_coding	chaperonin containing TCP1, subunit 6B (zeta 2)
ENSG00000078269.13	3.88	4.34	3.94	3.09	2.79	3.94	SYNJ2	chr6	protein_coding	synaptojanin 2
ENSG00000141519.14	0.45	0.58	0.48	0.67	0.78	1.24	CCDC40	chr17	protein_coding	coiled-coil domain containing 40
ENSG00000229023.1	0	0.09	0	0	0	0	AC067945.3	chr2	processed_pseudogene	--
ENSG00000267980.1	0.32	0.25	0.24	0.33	0.25	0.19	AC007292.6	chr19	antisense	--
ENSG00000187954.12	5.74	6.76	6.87	6.85	7.18	7.38	CYHR1	chr8	protein_coding	cysteine/histidine-rich 1
ENSG00000244055.1	0.37	0.42	0.28	0.38	0.59	0.53	AC007566.10	chr7	antisense	--
ENSG00000261172.1	0.25	0.25	0.13	0.14	0.31	0.27	RP11-356C4.5	chr16	lincRNA	--
ENSG00000068912.13	27.56	24.85	27.23	21.8	22.16	16.02	ERLEC1	chr2	protein_coding	endoplasmic reticulum lectin 1
ENSG00000233884.1	0.03	0	0	0	0	0	XXyac-YM21GA2.3	chr9	antisense	--
ENSG00000267213.4	0.55	0.28	0.4	0.39	0.33	0.35	AC007773.2	chr19	antisense	--
ENSG00000202031.1	2.3	2.3	2.99	3.52	2.71	4.47	SNORD38A	chr1	snoRNA	small nucleolar RNA, C/D box 38A
ENSG00000124067.16	7.13	8.34	8.46	7.76	8.78	16.75	SLC12A4	chr16	protein_coding	solute carrier family 12 (potassium/chloride transporter), member 4
ENSG00000274717.1	0	0.02	0	0	0.02	0.02	RP1-47A17.1	chr22	processed_pseudogene	--
ENSG00000151631.8	0	0.03	0	0	0	0	AKR1C6P	chr10	unprocessed_pseudogene	aldo-keto reductase family 1, member C6, pseudogene
ENSG00000164904.15	22.04	20.9	20.56	24.55	23.3	18.68	ALDH7A1	chr5	protein_coding	aldehyde dehydrogenase 7 family, member A1
ENSG00000114439.18	1.33	1.37	1.36	1.67	1.96	1.85	BBX	chr3	protein_coding	bobby sox homolog (Drosophila)
ENSG00000262714.1	0.01	0.04	0.01	0.04	0.01	0	RP11-44F14.8	chr16	lincRNA	--
ENSG00000087087.18	41.27	45.42	43.55	39.93	39.07	47.19	SRRT	chr7	protein_coding	serrate, RNA effector molecule
ENSG00000249855.1	0.16	0.19	0.24	0.28	0.22	0.27	EEF1A1P19	chr5	processed_pseudogene	eukaryotic translation elongation factor 1 alpha 1 pseudogene 19
ENSG00000198520.10	0.03	0.04	0.08	0.09	0.1	0.13	C1orf228	chr1	protein_coding	chromosome 1 open reading frame 228
ENSG00000101365.20	63.07	57.64	66.45	59.86	59.71	47.89	IDH3B	chr20	protein_coding	isocitrate dehydrogenase 3 (NAD+) beta
ENSG00000278966.2	0.03	0.09	0.03	0.03	0.03	0.31	RP5-1174N9.2	chr1	TEC	--
ENSG00000214760.2	0.11	0.05	0.06	0.11	0	0.06	RPL21P1	chr12	processed_pseudogene	ribosomal protein L21 pseudogene 1
ENSG00000258881.6	0.98	1.11	1.13	1.14	1.07	1.2	AC007040.11	chr2	protein_coding	--
ENSG00000134824.13	14.96	16.09	15.61	16.42	16.2	18.88	FADS2	chr11	protein_coding	fatty acid desaturase 2
ENSG00000275894.1	0.15	0.76	0.59	0.04	0.54	0.6	RP3-453C12.14	chr20	sense_intronic	--
ENSG00000179044.15	0.04	0.07	0.04	0.02	0.01	0.03	EXOC3L1	chr16	protein_coding	exocyst complex component 3-like 1
ENSG00000214147.2	0	0	0	0	0	0.02	RP11-332P22.2	chr3	processed_pseudogene	--
ENSG00000201675.1	3.83	1.91	1.78	1.96	2.9	3.73	SNORD32A	chr19	snoRNA	small nucleolar RNA, C/D box 32A
ENSG00000135838.13	0.01	0	0.02	0	0	0.02	NPL	chr1	protein_coding	N-acetylneuraminate pyruvate lyase (dihydrodipicolinate synthase)
ENSG00000262881.1	0.14	0.32	0.16	0.11	0.18	0.19	RP11-669E14.4	chr17	antisense	--
ENSG00000272646.1	0.19	0.25	0.14	0	0	0.13	RP11-188P17.2	chr4	lincRNA	--
ENSG00000233469.1	0	0.16	0.06	0	0.05	0	ST6GALNAC4P1	chr13	processed_pseudogene	ST6 (alpha-N-acetyl-neuraminyl-2,3-beta-galactosyl-1,3)-N-acetylgalactosaminide alpha-2,6-sialyltransferase 4 pseudogene 1
ENSG00000100612.13	13.53	11.89	13.4	13.57	13.68	10.69	DHRS7	chr14	protein_coding	dehydrogenase/reductase (SDR family) member 7
ENSG00000127419.16	3.53	4.26	4.55	4.25	4.99	5.36	TMEM175	chr4	protein_coding	transmembrane protein 175
ENSG00000229433.1	0.02	0.01	0	0	0.01	0	RP11-329B9.1	chr3	lincRNA	--
ENSG00000204176.13	0.18	0.25	0.17	0.19	0.21	0.27	SYT15	chr10	protein_coding	synaptotagmin XV
ENSG00000164934.13	15.19	13.67	14.4	14.88	14.68	10.54	DCAF13	chr8	protein_coding	DDB1 and CUL4 associated factor 13
ENSG00000183474.15	3.27	3.24	2.87	3.24	3.07	2.9	GTF2H2C	chr5	protein_coding	GTF2H2 family member C
ENSG00000270223.1	0	0.03	0	0	0.03	0.19	RP13-36G14.4	chrX	sense_intronic	--
ENSG00000116750.13	6.14	5.83	5.58	6.84	6.61	5.43	UCHL5	chr1	protein_coding	ubiquitin carboxyl-terminal hydrolase L5
ENSG00000246640.1	0.01	0	0	0	0.01	0.01	RP11-1094H24.4	chr17	lincRNA	--
ENSG00000160075.11	34.71	32.63	35.8	40.07	38.25	32.82	SSU72	chr1	protein_coding	SSU72 RNA polymerase II CTD phosphatase homolog (S. cerevisiae)
ENSG00000165475.13	24.6	22.45	24.29	24.8	25.26	19.15	CRYL1	chr13	protein_coding	crystallin, lambda 1
ENSG00000244361.1	0	0	0.09	0	0	0.09	RPL30P7	chr5	processed_pseudogene	ribosomal protein L30 pseudogene 7
ENSG00000278769.1	0.07	0.1	0.07	0.13	0	0.21	CTD-2036P10.5	chr15	antisense	--
ENSG00000126453.9	21.59	19.7	22.89	21.48	22.51	18.73	BCL2L12	chr19	protein_coding	BCL2-like 12 (proline rich)
ENSG00000238886.1	0	0	0	0	0	0.35	SNORD121A	chr9	snoRNA	small nucleolar RNA, C/D box 121A
ENSG00000222268.1	0.24	0.48	0.27	0.24	0	0	RNA5SP425	chr16	rRNA	RNA, 5S ribosomal pseudogene 425
ENSG00000188428.16	8.17	8	7.83	8.64	8.84	8.05	BLOC1S5	chr6	protein_coding	biogenesis of lysosomal organelles complex-1, subunit 5, muted
ENSG00000249337.2	0	0.11	0.08	0	0.04	0.49	SNX18P25	chr4	processed_pseudogene	sorting nexin 18 pseudogene 25
ENSG00000162522.10	12.61	14.62	13.85	18.23	18.69	21.38	KIAA1522	chr1	protein_coding	KIAA1522
ENSG00000279088.1	8.9	8.58	7.86	8.09	8.75	6.86	RP11-574K11.24	chr10	TEC	--
ENSG00000066697.14	15.67	14.62	16.07	16.74	16.95	13.68	MSANTD3	chr9	protein_coding	Myb/SANT-like DNA-binding domain containing 3
ENSG00000257642.1	0.05	0	0.11	0.05	0	0	RP11-474B16.1	chr12	antisense	--
ENSG00000139517.7	2.55	2.45	2.78	2.09	2.04	2.48	LNX2	chr13	protein_coding	ligand of numb-protein X 2
ENSG00000132874.13	0.03	0.09	0.03	0.04	0.02	0.07	SLC14A2	chr18	protein_coding	solute carrier family 14 (urea transporter), member 2
ENSG00000254057.1	0	0.05	0	0	0	0	RP3-388N13.3	chr8	lincRNA	--
ENSG00000165240.17	0.37	0.42	0.38	0.34	0.43	0.45	ATP7A	chrX	protein_coding	ATPase, Cu++ transporting, alpha polypeptide
ENSG00000006042.11	17.65	15.3	16.67	16.24	15.94	12.11	TMEM98	chr17	protein_coding	transmembrane protein 98
ENSG00000131149.17	7.27	8.89	7.28	7.69	7.77	10.61	GSE1	chr16	protein_coding	Gse1 coiled-coil protein
ENSG00000223711.1	0.5	0.26	0.18	0.2	0	0.21	AC091633.3	chr3	antisense	--
ENSG00000183735.9	7.2	6.68	7.16	6.58	7.09	4.94	TBK1	chr12	protein_coding	TANK-binding kinase 1
ENSG00000205143.2	0.06	0.04	0.02	0.06	0.02	0.02	ARID3C	chr9	protein_coding	AT rich interactive domain 3C (BRIGHT-like)
ENSG00000234624.2	0	0.52	0	0.18	0.09	0.09	AC016894.1	chr2	processed_pseudogene	--
ENSG00000100626.16	0	0.01	0.01	0	0.02	0.03	GALNT16	chr14	protein_coding	polypeptide N-acetylgalactosaminyltransferase 16
ENSG00000116580.18	1.66	1.81	1.65	1.6	1.57	4.55	GON4L	chr1	protein_coding	gon-4-like (C. elegans)
ENSG00000234061.1	0	0	0	0.14	0	0	AC007969.4	chr2	processed_pseudogene	--
ENSG00000116161.17	36.3	30.89	34.22	35.59	34.79	27.21	CACYBP	chr1	protein_coding	calcyclin binding protein
ENSG00000203808.10	0	0.01	0	0	0	0	BVES-AS1	chr6	antisense	BVES antisense RNA 1
ENSG00000241959.3	0	0.09	0.1	0	0.19	0	RN7SL76P	chr7	misc_RNA	RNA, 7SL, cytoplasmic 76, pseudogene
ENSG00000150551.10	0.02	0.02	0.03	0	0.04	0.02	LYPD1	chr2	protein_coding	LY6/PLAUR domain containing 1
ENSG00000171533.11	0	0	0	0.01	0	0.02	MAP6	chr11	protein_coding	microtubule-associated protein 6
ENSG00000250427.1	0	0	0.02	0	0	0.02	CTD-3179P9.2	chr5	lincRNA	--
ENSG00000236538.1	0.06	0	0	0	0	0	ZNF863P	chr2	processed_pseudogene	zinc finger protein 863, pseudogene
ENSG00000250386.1	0	0	0	0	0.07	0	RP11-432M8.11	chr5	processed_pseudogene	--
ENSG00000243514.2	0	0	0	0.07	0	0	RPL32P33	chr17	processed_pseudogene	ribosomal protein L32 pseudogene 33
ENSG00000140107.10	2.98	2.84	3.14	2.62	2.26	2.17	SLC25A47	chr14	protein_coding	solute carrier family 25, member 47
ENSG00000133858.15	2.04	2.42	2.09	2.15	2.09	2.56	ZFC3H1	chr12	protein_coding	zinc finger, C3H1-type containing
ENSG00000245598.6	0	0	0	0	0	0.02	DACT3-AS1	chr19	antisense	DACT3 antisense RNA 1
ENSG00000225200.2	0.04	0	0	0	0	0	AB019441.29	chr14	processed_pseudogene	--
ENSG00000160229.11	0.15	0.29	0.22	0.14	0.14	0.28	ZNF66	chr19	protein_coding	zinc finger protein 66
ENSG00000227536.1	0	0.09	0.02	0	0.05	0.07	SOCS5P4	chrX	processed_pseudogene	suppressor of cytokine signaling 5 pseudogene 4
ENSG00000116171.16	11.53	9.07	10.48	10.31	10.34	7.47	SCP2	chr1	protein_coding	sterol carrier protein 2
ENSG00000232453.5	0.24	0.24	0.17	0.14	0.22	0.23	RP4-794H19.1	chr1	lincRNA	--
ENSG00000105136.19	1.38	1.22	1.09	1.36	1.49	1.22	ZNF419	chr19	protein_coding	zinc finger protein 419
ENSG00000004455.16	50.44	42.73	47.06	51.24	48.37	39.14	AK2	chr1	protein_coding	adenylate kinase 2
ENSG00000254852.8	0.08	0.04	0.06	0.06	0	0.02	NPIPA2	chr16	protein_coding	nuclear pore complex interacting protein family, member A2
ENSG00000177732.7	16.26	18.09	15.93	23.28	22.32	23.48	SOX12	chr20	protein_coding	SRY (sex determining region Y)-box 12
ENSG00000228327.2	0.22	0.2	0.16	0.08	0.25	3.05	RP11-206L10.2	chr1	lincRNA	--
ENSG00000161653.10	1.83	2.17	2.4	2.65	2.82	2.61	NAGS	chr17	protein_coding	N-acetylglutamate synthase
ENSG00000265733.1	0	0	0	0	0	0.14	SNORA74	chr10	snoRNA	--
ENSG00000174125.7	0	0.03	0.02	0.01	0.02	0.01	TLR1	chr4	protein_coding	toll-like receptor 1
ENSG00000159247.12	2.86	2.93	3.02	2.51	2.68	2.82	TUBBP5	chr9	transcribed_unprocessed_pseudogene	tubulin, beta pseudogene 5
ENSG00000259933.6	0.05	0.05	0.12	0	0.05	0	RP11-304L19.1	chr16	sense_overlapping	--
ENSG00000116497.17	5.68	6.22	5.16	6.23	5.95	4.9	S100PBP	chr1	protein_coding	S100P binding protein
ENSG00000117174.10	3.67	3.29	3.59	3.28	3.4	3.34	ZNHIT6	chr1	protein_coding	zinc finger, HIT-type containing 6
ENSG00000166164.15	22.33	21.39	20.5	25.31	26.83	21.8	BRD7	chr16	protein_coding	bromodomain containing 7
ENSG00000260339.1	0.02	0.04	0.03	0.06	0.05	0.09	HEXA-AS1	chr15	antisense	HEXA antisense RNA 1
ENSG00000116525.13	1.85	2.39	2.4	2.27	1.93	2.39	TRIM62	chr1	protein_coding	tripartite motif containing 62
ENSG00000227463.2	0	0.04	0	0	0	0	RP11-158D2.2	chr9	lincRNA	--
ENSG00000187867.8	1.11	1.29	1.36	1.14	0.73	1.04	PALM3	chr19	protein_coding	paralemmin 3
ENSG00000260520.1	0	0	0.07	0	0	0	RP11-510M2.6	chr16	antisense	--
ENSG00000232265.7	0	0	0	0	0	0.02	XXyac-YX155B6.5	chr1	lincRNA	--
ENSG00000141524.15	5.57	6.78	6.51	7.84	8.24	11.41	TMC6	chr17	protein_coding	transmembrane channel-like 6
ENSG00000166317.11	0.05	0.06	0.04	0.04	0.06	0.03	SYNPO2L	chr10	protein_coding	synaptopodin 2-like
ENSG00000184481.16	1.4	1.57	1.62	1.58	1.54	2.43	FOXO4	chrX	protein_coding	forkhead box O4
ENSG00000267192.1	0	0	0	0	0	0.06	AC006116.12	chr19	antisense	--
ENSG00000080618.13	14.76	12.91	13.69	10.42	9.71	6.09	CPB2	chr13	protein_coding	carboxypeptidase B2 (plasma)
ENSG00000166407.13	0	0.05	0	0	0	0	LMO1	chr11	protein_coding	LIM domain only 1 (rhombotin 1)
ENSG00000276745.1	0.27	1.59	0	0.27	0.54	0	AL138726.1	chr6	miRNA	--
ENSG00000160716.4	0	0	0.01	0	0	0.01	CHRNB2	chr1	protein_coding	cholinergic receptor, nicotinic, beta 2 (neuronal)
ENSG00000228140.1	0.01	0.02	0.05	0.02	0.02	0.05	RP3-467K16.4	chr1	lincRNA	--
ENSG00000248873.1	0.03	0	0.03	0	0.06	0	SERBP1P6	chr5	processed_pseudogene	SERPINE1 mRNA binding protein 1 pseudogene 6
ENSG00000183506.16	2.71	3.41	3.06	2.63	2.59	3.99	PI4KAP2	chr22	transcribed_unprocessed_pseudogene	phosphatidylinositol 4-kinase, catalytic, alpha pseudogene 2
ENSG00000239257.1	1.25	1.25	1.52	1.11	1.73	0.97	RPL23AP1	chr6	transcribed_processed_pseudogene	ribosomal protein L23a pseudogene 1
ENSG00000169740.13	13.29	10.76	12.79	19.31	19.64	13.92	ZNF32	chr10	protein_coding	zinc finger protein 32
ENSG00000148834.12	327.5	258.26	317.34	294.58	288.94	223.29	GSTO1	chr10	protein_coding	glutathione S-transferase omega 1
ENSG00000278931.1	0.03	0.02	0	0.02	0.02	0.03	bP-2189O9.2	chr21	unprocessed_pseudogene	--
ENSG00000183671.12	0	0.03	0	0	0.01	0.01	GPR1	chr2	protein_coding	G protein-coupled receptor 1
ENSG00000221634.1	0	0	0	0	0	0.34	MIR1276	chr15	miRNA	microRNA 1276
ENSG00000271429.1	0	0.11	0.13	0	0	0.12	RPL17P51	chr13	processed_pseudogene	ribosomal protein L17 pseudogene 51
ENSG00000164037.16	0.01	0.01	0.06	0.11	0.13	0.12	SLC9B1	chr4	protein_coding	solute carrier family 9, subfamily B (NHA1, cation proton antiporter 1), member 1
ENSG00000260805.2	0.1	0.1	0.02	0.12	0.23	0.22	RP11-61J19.5	chr1	lincRNA	--
ENSG00000162923.14	7.65	8.27	7.95	7.73	8.46	6.89	WDR26	chr1	protein_coding	WD repeat domain 26
ENSG00000279242.1	0	0	0	0.04	0	0	RP11-195O1.5	chr10	processed_transcript	--
ENSG00000197599.12	1	1.15	1.07	1.25	1.3	1.58	CCDC154	chr16	protein_coding	coiled-coil domain containing 154
ENSG00000023191.16	27.01	26.31	28.7	30.9	32.14	29.53	RNH1	chr11	protein_coding	ribonuclease/angiogenin inhibitor 1
ENSG00000167685.14	19.84	22.16	23.95	20.96	20.88	20.77	ZNF444	chr19	protein_coding	zinc finger protein 444
ENSG00000180574.3	0.06	0.06	0.11	0.06	0.13	0.02	EIF2S3L	chr12	protein_coding	--
ENSG00000273632.1	0	0.24	0	0	0	0.26	AC027319.3	chr19	miRNA	--
ENSG00000255326.1	0.04	0	0	0	0	0	CTD-2530H12.4	chr11	antisense	--
ENSG00000254635.5	4.55	4.53	4.25	6.71	7.05	6.42	WAC-AS1	chr10	antisense	WAC antisense RNA 1 (head to head)
ENSG00000130725.7	50.59	50.13	54.08	49.32	47.35	43.4	UBE2M	chr19	protein_coding	ubiquitin-conjugating enzyme E2M
ENSG00000258694.1	0	0	0	0.08	0	0	RP11-1033H12.1	chr14	lincRNA	--
ENSG00000213830.3	0.37	0.43	0.12	0.44	0.11	0.45	CFL1P5	chr5	processed_pseudogene	cofilin 1 (non-muscle) pseudogene 5
ENSG00000205362.10	1.73	2.05	2.15	4	3.57	4.02	MT1A	chr16	protein_coding	metallothionein 1A
ENSG00000278469.1	0.19	0.28	0.1	0	0	0	Metazoa_SRP	chr12	misc_RNA	--
ENSG00000123364.4	0.52	0.67	0.54	0.76	0.77	0.46	HOXC13	chr12	protein_coding	homeobox C13
ENSG00000237740.1	0	0	0.02	0	0	0	NPAP1P3	chr10	processed_pseudogene	nuclear pore associated protein 1 pseudogene 3
ENSG00000090432.6	20.33	20.13	22.87	22.5	21.46	18.39	MUL1	chr1	protein_coding	mitochondrial E3 ubiquitin protein ligase 1
ENSG00000272667.1	3.57	3.83	3.84	5.61	5.94	4.88	RP11-395A13.2	chr2	lincRNA	--
ENSG00000254495.1	0	0	0.08	0	0.07	0	AP000487.4	chr11	antisense	--
ENSG00000244252.1	0	0.05	0	0.05	0	0.05	RP11-495P10.7	chr1	lincRNA	--
ENSG00000090316.15	20.92	20.36	23.03	22.19	21.42	18.99	MAEA	chr4	protein_coding	macrophage erythroblast attacher
ENSG00000237412.6	0.21	0.12	0.15	0.14	0.2	0.37	PRSS56	chr2	protein_coding	protease, serine, 56
ENSG00000125652.7	15.51	12.66	17.67	13.46	13.13	11.89	ALKBH7	chr19	protein_coding	alkB, alkylation repair homolog 7 (E. coli)
ENSG00000166337.9	38	36.12	40.23	50.53	46.94	42.22	TAF10	chr11	protein_coding	TAF10 RNA polymerase II, TATA box binding protein (TBP)-associated factor, 30kDa
ENSG00000223813.2	1.28	1.28	1.08	0.91	1.13	1.23	AC007255.8	chr7	antisense	--
ENSG00000166669.13	4.44	4.88	4.43	3.67	3.71	2.95	ATF7IP2	chr16	protein_coding	activating transcription factor 7 interacting protein 2
ENSG00000154124.4	2.76	2.63	2.79	2.8	2.94	3.45	OTULIN	chr5	protein_coding	OTU deubiquitinase with linear linkage specificity
ENSG00000264672.5	0.02	0	0	0	0	0	SEPT4-AS1	chr17	antisense	SEPT4 antisense RNA 1
ENSG00000174928.15	5.32	4.73	5.68	5.03	4.46	3.94	C3orf33	chr3	protein_coding	chromosome 3 open reading frame 33
ENSG00000201524.1	0	0.5	0	0	0	0	RNU6-450P	chr17	snRNA	RNA, U6 small nuclear 450, pseudogene
ENSG00000197355.10	6.06	6.68	6.78	7.33	7.57	9.53	UAP1L1	chr9	protein_coding	UDP-N-acetylglucosamine pyrophosphorylase 1 like 1
ENSG00000163399.15	157.46	151.15	168.62	132.1	130.22	129.06	ATP1A1	chr1	protein_coding	ATPase, Na+/K+ transporting, alpha 1 polypeptide
ENSG00000267723.1	0	0	0	0.04	0	0	CTD-2189E23.1	chr19	lincRNA	--
ENSG00000171657.5	0.03	0.06	0.04	0.08	0.08	0.08	GPR82	chrX	protein_coding	G protein-coupled receptor 82
ENSG00000170469.10	3.6	2.69	3.59	4.88	4.26	4.06	SPATA24	chr5	protein_coding	spermatogenesis associated 24
ENSG00000232938.2	1.91	1.26	1.64	2.37	1.97	1.97	RPL23AP87	chr17	transcribed_processed_pseudogene	ribosomal protein L23a pseudogene 87
ENSG00000119681.11	0.33	0.34	0.36	0.36	0.41	0.62	LTBP2	chr14	protein_coding	latent transforming growth factor beta binding protein 2
ENSG00000198730.7	6.67	5.84	5.99	6.68	6.63	6.14	CTR9	chr11	protein_coding	CTR9, Paf1/RNA polymerase II complex component
ENSG00000259939.1	0.39	0.72	0.37	0.27	0.6	1.67	RP11-77H9.5	chr16	antisense	--
ENSG00000259431.5	0.7	0.56	0.66	0.79	0.91	1.25	THTPA	chr14	protein_coding	thiamine triphosphatase
ENSG00000196152.10	2.06	2.21	2.06	2.68	2.43	3.03	ZNF79	chr9	protein_coding	zinc finger protein 79
ENSG00000154328.15	5.77	5.85	5.29	5.68	6.16	5.56	NEIL2	chr8	protein_coding	nei endonuclease VIII-like 2 (E. coli)
ENSG00000173085.13	7.84	7.04	7.83	9.29	9.61	7.36	COQ2	chr4	protein_coding	coenzyme Q2 4-hydroxybenzoate polyprenyltransferase
ENSG00000177125.5	0.88	0.95	0.93	1.05	1.13	1.04	ZBTB34	chr9	protein_coding	zinc finger and BTB domain containing 34
ENSG00000123179.13	53.44	45.32	52.74	41.4	39.51	32.81	EBPL	chr13	protein_coding	emopamil binding protein-like
ENSG00000263006.6	0.16	0.23	0.12	0.09	0.09	0.08	ROCK1P1	chr18	transcribed_unprocessed_pseudogene	Rho-associated, coiled-coil containing protein kinase 1 pseudogene 1
ENSG00000088854.12	1.72	2.13	1.97	2.82	3.31	3.41	C20orf194	chr20	protein_coding	chromosome 20 open reading frame 194
ENSG00000254459.1	0.05	0	0.05	0.05	0.19	0.05	RP11-91P24.7	chr11	antisense	--
ENSG00000112715.20	8.8	9.6	8.29	7.63	7.81	8.43	VEGFA	chr6	protein_coding	vascular endothelial growth factor A
ENSG00000242687.2	0.22	0.45	0.38	0.13	0.23	0.36	AC004893.11	chr7	antisense	--
ENSG00000274897.2	0.18	0.18	0.2	0.23	0.27	0.3	PANO1	chr11	protein_coding	proapoptotic nucleolar protein 1
ENSG00000049541.10	31.3	28.13	29.12	34.16	31.12	26.69	RFC2	chr7	protein_coding	replication factor C (activator 1) 2, 40kDa
ENSG00000280355.1	0.16	0.18	0.11	0.22	0.2	0.6	RP11-119F19.5	chr10	TEC	--
ENSG00000236719.2	0.13	0.18	0.04	0.11	0.13	0.02	OVAAL	chr1	lincRNA	ovarian adenocarcinoma amplified long non-coding RNA
ENSG00000113966.9	0.38	0.44	0.54	0.47	0.47	0.36	ARL6	chr3	protein_coding	ADP-ribosylation factor-like 6
ENSG00000259976.1	3.84	4.47	4.24	4.24	4.63	3.54	RP11-553L6.5	chr3	lincRNA	--
ENSG00000259162.1	0	0.06	0.07	0.18	0.15	0.16	RP11-203M5.6	chr14	transcribed_unprocessed_pseudogene	--
ENSG00000131067.16	6.08	6.31	7.23	7.01	7.43	9.05	GGT7	chr20	protein_coding	gamma-glutamyltransferase 7
ENSG00000221953.5	0.53	0.38	0.5	0.57	0.64	1.23	C1orf229	chr1	lincRNA	chromosome 1 open reading frame 229
ENSG00000167332.7	0	0	0.01	0.01	0	0.01	OR51E2	chr11	protein_coding	olfactory receptor, family 51, subfamily E, member 2
ENSG00000186615.10	0.86	0.72	0.88	1	1.03	1.36	KTN1-AS1	chr14	antisense	KTN1 antisense RNA 1
ENSG00000214925.3	0.07	0	0	0	0.07	0	RP3-507I15.1	chrX	processed_pseudogene	--
ENSG00000088367.20	11.6	12.19	11.01	26.42	28.65	32.17	EPB41L1	chr20	protein_coding	erythrocyte membrane protein band 4.1-like 1
ENSG00000162928.8	6.65	6.32	6.93	7.65	7.39	7.31	PEX13	chr2	protein_coding	peroxisomal biogenesis factor 13
ENSG00000197043.13	22.93	19.09	21.7	30.87	30.52	27.65	ANXA6	chr5	protein_coding	annexin A6
ENSG00000125449.6	7.66	7.65	8.2	7.16	6.92	6.23	ARMC7	chr17	protein_coding	armadillo repeat containing 7
ENSG00000155980.11	1.22	1.44	1.21	0.86	0.88	0.97	KIF5A	chr12	protein_coding	kinesin family member 5A
ENSG00000086758.15	6.05	7.82	6.36	6.62	6.64	20.35	HUWE1	chrX	protein_coding	HECT, UBA and WWE domain containing 1, E3 ubiquitin protein ligase
ENSG00000204839.8	0.89	1.24	1.25	1.44	1.28	1.69	MROH6	chr8	protein_coding	maestro heat-like repeat family member 6
ENSG00000268746.1	0.08	0.08	0.09	0.08	0.08	0.25	CTD-2571L23.8	chr19	lincRNA	--
ENSG00000266667.1	0	0	0	0	0.05	0	RP11-849N15.4	chr17	lincRNA	--
ENSG00000268043.7	0.71	0.84	0.78	0.67	0.84	1.38	NBPF12	chr1	protein_coding	neuroblastoma breakpoint family, member 12
ENSG00000201558.1	0.16	0.16	0.36	0.17	0	0	RNVU1-6	chr1	snRNA	RNA, variant U1 small nuclear 6
ENSG00000261723.1	0	0	0	0	0	0.05	CTD-2196E14.3	chr16	antisense	--
ENSG00000265010.1	0	0.42	0.09	0.17	0.08	0.27	RP11-661C3.2	chr17	sense_intronic	--
ENSG00000271659.1	0.56	0.17	0.69	0.52	0.51	0.78	RP11-435O5.4	chr9	antisense	--
ENSG00000172922.8	7.44	6.92	8.12	9.32	9.2	8.22	RNASEH2C	chr11	protein_coding	ribonuclease H2, subunit C
ENSG00000137801.10	7.46	7.63	8.01	6.1	6.02	8.65	THBS1	chr15	protein_coding	thrombospondin 1
ENSG00000217648.1	2.54	1.81	2.34	2.6	1.76	1.45	RP1-95L4.4	chr6	processed_pseudogene	--
ENSG00000173706.12	2.51	2.81	2.39	1.8	1.72	2.56	HEG1	chr3	protein_coding	heart development protein with EGF-like domains 1
ENSG00000115425.13	21.08	18.5	19.42	20.64	18.58	16.81	PECR	chr2	protein_coding	peroxisomal trans-2-enoyl-CoA reductase
ENSG00000262294.1	1.29	0.97	0.68	1.25	1.09	1.1	RP11-1260E13.2	chr17	antisense	--
ENSG00000271973.1	0	0.19	0.11	0	0	0	RP11-572O6.1	chr3	lincRNA	--
ENSG00000049449.8	26.18	25.04	26.11	27.01	27.51	21.51	RCN1	chr11	protein_coding	reticulocalbin 1, EF-hand calcium binding domain
ENSG00000226245.1	0.06	0	0	0	0	0	ZNF32-AS1	chr10	antisense	ZNF32 antisense RNA 1
ENSG00000269038.1	1.01	0.47	0.26	0.79	0.9	1.26	AP001462.6	chr11	lincRNA	--
ENSG00000224799.1	0.08	0.33	0.05	0.13	0.04	0.18	RP11-445O16.3	chrX	antisense	--
ENSG00000166825.13	52.46	65.1	53.49	48.11	46.63	51.14	ANPEP	chr15	protein_coding	alanyl (membrane) aminopeptidase
ENSG00000280147.1	0	0	0	0	0	0.02	RP11-486M23.3	chr8	TEC	--
ENSG00000110696.9	53.2	42.95	49.34	53.92	53.98	41.36	C11orf58	chr11	protein_coding	chromosome 11 open reading frame 58
ENSG00000180769.8	0.07	0.07	0.07	0.1	0.09	0.07	WDFY3-AS2	chr4	processed_transcript	WDFY3 antisense RNA 2
ENSG00000066379.14	29.44	27.55	30.38	32.88	31.18	25.85	ZNRD1	chr6	protein_coding	zinc ribbon domain containing 1
ENSG00000279466.1	0	0.06	0	0	0	0	RP11-386I8.5	chr12	TEC	--
ENSG00000164509.13	0	0.02	0	0	0.01	0.01	IL31RA	chr5	protein_coding	interleukin 31 receptor A
ENSG00000153187.16	55.78	56.48	52.2	60.37	61.51	70.17	HNRNPU	chr1	protein_coding	heterogeneous nuclear ribonucleoprotein U (scaffold attachment factor A)
ENSG00000278615.4	40.02	33.89	39.84	37.68	38.06	33.21	C11orf98	chr11	protein_coding	chromosome 11 open reading frame 98
ENSG00000103415.11	20.38	17.37	20.5	21.52	20.28	16.55	HMOX2	chr16	protein_coding	heme oxygenase 2
ENSG00000280236.1	0	0	0	0	0	0.03	OR12D2	chr6	polymorphic_pseudogene	olfactory receptor, family 12, subfamily D, member 2 (gene/pseudogene)
ENSG00000162174.12	8.79	8.09	9.13	8.79	8.49	7.86	ASRGL1	chr11	protein_coding	asparaginase like 1
ENSG00000143595.12	0.08	0.06	0.15	0.06	0.02	0.04	AQP10	chr1	protein_coding	aquaporin 10
ENSG00000187944.2	0.02	0	0.04	0	0.02	0.02	C2orf66	chr2	protein_coding	chromosome 2 open reading frame 66
ENSG00000279539.1	0.17	0.16	0.35	0.26	0.3	0.4	AC006486.10	chr19	TEC	--
ENSG00000122136.13	0.08	0.05	0	0.11	0.05	0.03	OBP2A	chr9	protein_coding	odorant binding protein 2A
ENSG00000202459.1	0	0	0	0	0	0.26	Y_RNA	chr14	misc_RNA	--
ENSG00000012504.13	8.4	7.49	7.45	5.8	4.51	3.26	NR1H4	chr12	protein_coding	nuclear receptor subfamily 1, group H, member 4
ENSG00000221783.1	0	0	0	0	0	0.32	MIR1183	chr7	miRNA	microRNA 1183
ENSG00000256377.5	0	0.02	0	0	0	0	RP11-1060J15.4	chr12	antisense	--
ENSG00000213949.8	1.01	0.93	0.92	1.18	1.04	1.01	ITGA1	chr5	protein_coding	integrin, alpha 1
ENSG00000213742.6	0.63	0.82	0.75	0.83	0.76	1.06	ZNF337-AS1	chr20	antisense	ZNF337 antisense RNA 1
ENSG00000203814.6	0.02	0.06	0.02	0.04	0.06	0.54	HIST2H2BF	chr1	protein_coding	histone cluster 2, H2bf
ENSG00000070808.15	0	0.01	0	0.01	0.01	0	CAMK2A	chr5	protein_coding	calcium/calmodulin-dependent protein kinase II alpha
ENSG00000276390.1	3.16	2.54	2.43	1.8	1.73	2.97	RP1-197B17.5	chr12	sense_intronic	--
ENSG00000267547.1	0	0.05	0	0	0	0.05	RP11-686D22.4	chr17	lincRNA	--
ENSG00000159063.12	30.3	26.53	29.76	31.08	32.42	22.67	ALG8	chr11	protein_coding	ALG8, alpha-1,3-glucosyltransferase
ENSG00000267309.1	0.54	0.94	0.84	0.89	1.05	1.08	CTD-2630F21.1	chr19	antisense	--
ENSG00000130653.15	0.4	0.38	0.39	0.33	0.24	0.59	PNPLA7	chr9	protein_coding	patatin-like phospholipase domain containing 7
ENSG00000175229.6	0	0	0.01	0	0	0	GAL3ST3	chr11	protein_coding	galactose-3-O-sulfotransferase 3
ENSG00000148468.16	13.21	14.05	12.38	17.5	16.88	16.93	FAM171A1	chr10	protein_coding	family with sequence similarity 171, member A1
ENSG00000264535.1	0	0.28	0	0	0	0	AC093788.1	chr4	miRNA	--
ENSG00000120451.10	0	0	0	0	0	0.01	SNX19	chr11	protein_coding	sorting nexin 19
ENSG00000168813.16	1.68	1.83	1.54	1.63	1.62	1.58	ZNF507	chr19	protein_coding	zinc finger protein 507
ENSG00000170836.11	6.58	6.4	6.89	5.92	6.31	4.94	PPM1D	chr17	protein_coding	protein phosphatase, Mg2+/Mn2+ dependent, 1D
ENSG00000162458.12	24.31	23.93	27.89	28.97	29.92	29.3	FBLIM1	chr1	protein_coding	filamin binding LIM protein 1
ENSG00000230587.1	0.39	0.2	0.57	0.23	0.11	0.3	AC093609.1	chr2	lincRNA	--
ENSG00000274667.1	1.1	0.79	0.66	2.26	1.83	1.09	RP11-31H5.3	chr15	sense_intronic	--
ENSG00000128253.13	0	0	0	0.02	0	0	RFPL2	chr22	protein_coding	ret finger protein-like 2
ENSG00000261586.2	0	0	0.01	0	0	0	RP11-923I11.6	chr12	lincRNA	--
ENSG00000182118.5	3.31	2.74	3.22	3.96	4.77	2.95	FAM89A	chr1	protein_coding	family with sequence similarity 89, member A
ENSG00000055957.10	0.38	0.55	0.27	0.11	0.18	0.17	ITIH1	chr3	protein_coding	inter-alpha-trypsin inhibitor heavy chain 1
ENSG00000256574.6	0.02	0	0	0	0.02	0	OR13A1	chr10	protein_coding	olfactory receptor, family 13, subfamily A, member 1
ENSG00000164442.9	2.54	2.87	2.9	1.95	1.69	1.47	CITED2	chr6	protein_coding	Cbp/p300-interacting transactivator, with Glu/Asp-rich carboxy-terminal domain, 2
ENSG00000100129.17	113.27	100.05	109.57	99.52	98.26	71.53	EIF3L	chr22	protein_coding	eukaryotic translation initiation factor 3, subunit L
ENSG00000268858.2	4.74	5.05	4.67	7.39	7.31	9.45	RP4-591C20.9	chr20	antisense	--
ENSG00000135090.13	2.85	2.44	2.51	2.86	2.65	3.45	TAOK3	chr12	protein_coding	TAO kinase 3
ENSG00000065183.15	3.38	3.19	3.02	3.12	3.16	2.43	WDR3	chr1	protein_coding	WD repeat domain 3
ENSG00000167862.9	47.84	38.66	43.76	52.82	51.53	40.06	ICT1	chr17	protein_coding	immature colon carcinoma transcript 1
ENSG00000220988.1	0.29	0.29	0.99	0.3	0.6	1.88	SNORD88C	chr19	snoRNA	small nucleolar RNA, C/D box 88C
ENSG00000026103.19	13.26	11.7	13.68	12.17	12.65	8.99	FAS	chr10	protein_coding	Fas cell surface death receptor
ENSG00000122861.15	0.45	0.23	0.42	1.16	1	0.94	PLAU	chr10	protein_coding	plasminogen activator, urokinase
ENSG00000167280.16	2.77	3.56	3.66	3.29	3.18	8.34	ENGASE	chr17	protein_coding	endo-beta-N-acetylglucosaminidase
ENSG00000242979.1	0	0.07	0	0.07	0	0.07	RPS15AP18	chr5	processed_pseudogene	ribosomal protein S15a pseudogene 18
ENSG00000136630.12	0.14	0.07	0.05	0.11	0.12	0.09	HLX	chr1	protein_coding	H2.0-like homeobox
ENSG00000267222.1	0.08	0.16	0.22	0.12	0.04	0.46	RP11-194N12.2	chr17	sense_intronic	--
ENSG00000072506.12	101.09	82.87	99.92	102.51	98.8	79.85	HSD17B10	chrX	protein_coding	hydroxysteroid (17-beta) dehydrogenase 10
ENSG00000104435.13	0.01	0	0.03	0	0	0	STMN2	chr8	protein_coding	stathmin 2
ENSG00000272990.1	1.9	2.48	2	1.19	1.07	1.01	RP11-305K5.1	chr3	antisense	--
ENSG00000223714.1	0	0.06	0	0.03	0	0.03	RP5-1172N10.2	chrX	lincRNA	--
ENSG00000234694.1	1.13	0.85	0.5	0.99	1.8	1.21	RP1-92O14.3	chr1	antisense	--
ENSG00000187796.13	2.83	3.52	3.6	4.21	4.1	5.6	CARD9	chr9	protein_coding	caspase recruitment domain family, member 9
ENSG00000235563.1	0.03	0.13	0.1	0	0.03	0.02	RP11-334A14.8	chr1	antisense	--
ENSG00000078070.11	5.2	4.55	4.31	6.59	6.64	5.61	MCCC1	chr3	protein_coding	methylcrotonoyl-CoA carboxylase 1 (alpha)
ENSG00000183044.11	23.71	23.58	24.42	22.18	22.61	25.84	ABAT	chr16	protein_coding	4-aminobutyrate aminotransferase
ENSG00000278002.1	0.02	0.02	0.07	0.04	0.02	0.07	RP11-596C23.2	chr14	lincRNA	--
ENSG00000229672.2	0	0.04	0	0	0.04	0	RP11-184A2.3	chr10	antisense	--
ENSG00000225171.2	0.12	0.06	0	0.06	0.06	0	DUTP6	chr1	processed_pseudogene	deoxyuridine triphosphatase pseudogene 6
ENSG00000231307.1	0.04	0.11	0.04	0	0	0.16	RPS3P2	chr20	processed_pseudogene	ribosomal protein S3 pseudogene 2
ENSG00000228404.1	0.14	0.05	0	0	0	0	AP001468.58	chr21	antisense	--
ENSG00000163807.5	7.1	6.56	6.88	7.59	7.86	7.68	KIAA1143	chr3	protein_coding	KIAA1143
ENSG00000180628.14	8.74	8.6	9.25	7.61	7.32	5.85	PCGF5	chr10	protein_coding	polycomb group ring finger 5
ENSG00000253888.1	0.05	0.05	0	0	0	0	RP11-521M14.1	chr8	antisense	--
ENSG00000119866.20	0	0.01	0.01	0	0.01	0	BCL11A	chr2	protein_coding	B-cell CLL/lymphoma 11A (zinc finger protein)
ENSG00000278770.1	0	0.1	0	0	0	0	Metazoa_SRP	chr17	misc_RNA	--
ENSG00000204519.10	0.71	0.8	0.69	1.07	1.14	1.53	ZNF551	chr19	protein_coding	zinc finger protein 551
ENSG00000145491.11	0.02	0.02	0.06	0.08	0	0.02	ROPN1L	chr5	protein_coding	rhophilin associated tail protein 1-like
ENSG00000279905.1	0	0.03	0.01	0.02	0.02	0.03	RP11-117L5.1	chr12	TEC	--
ENSG00000146409.10	6.83	6.55	6.8	4.75	5.3	4.07	SLC18B1	chr6	protein_coding	solute carrier family 18, subfamily B, member 1
ENSG00000171540.7	0.01	0.01	0.03	0.03	0.02	0.01	OTP	chr5	protein_coding	orthopedia homeobox
ENSG00000232368.1	0	0.05	0	0	0	0	FTLP2	chrX	processed_pseudogene	ferritin, light polypeptide pseudogene 2
ENSG00000225945.1	0	0	0	0.07	0	0	RP3-441A12.1	chr6	antisense	--
ENSG00000151239.13	23.61	21.42	22.69	24.53	25.79	17.91	TWF1	chr12	protein_coding	twinfilin actin binding protein 1
ENSG00000225546.5	0.15	0.16	0.06	0.05	0.08	0.14	RP11-328J2.1	chr7	lincRNA	--
ENSG00000206910.1	0.38	0.57	0.64	0.2	0.58	0.41	SNORA29	chr6	snoRNA	small nucleolar RNA, H/ACA box 29
ENSG00000088002.11	2.95	2.72	3.6	0.48	0.32	0.32	SULT2B1	chr19	protein_coding	sulfotransferase family, cytosolic, 2B, member 1
ENSG00000185262.8	22.58	21.56	24.64	24.48	26	22.09	UBALD2	chr17	protein_coding	UBA-like domain containing 2
ENSG00000256314.1	0.06	0.11	0	0	0.06	0.12	RP11-338E21.3	chr12	antisense	--
ENSG00000280037.1	0	0.26	0	0	0	0.5	RP11-434P11.1	chr2	TEC	--
ENSG00000230383.1	0.09	0.09	0.03	0	0	0.07	AC009245.3	chr7	processed_pseudogene	--
ENSG00000231762.1	0.01	0.02	0	0	0.02	0.05	RP11-354K4.1	chr6	processed_pseudogene	--
ENSG00000205707.10	3.03	2.52	2.78	3.83	4.92	3.19	LYRM5	chr12	protein_coding	LYR motif containing 5
ENSG00000264364.2	11.72	12.29	11.75	13.97	14.36	16.01	DYNLL2	chr17	protein_coding	dynein, light chain, LC8-type 2
ENSG00000184194.5	0	0	0.01	0.02	0.02	0.03	GPR173	chrX	protein_coding	G protein-coupled receptor 173
ENSG00000068745.14	16.57	18.29	18.94	16.94	17.53	15.36	IP6K2	chr3	protein_coding	inositol hexakisphosphate kinase 2
ENSG00000178654.11	0	0	0.05	0	0	0	PPIAP33	chr9	processed_pseudogene	peptidylprolyl isomerase A (cyclophilin A) pseudogene 33
ENSG00000169660.15	5.65	6.35	6.74	5.73	6.06	7.51	HEXDC	chr17	protein_coding	hexosaminidase (glycosyl hydrolase family 20, catalytic domain) containing
ENSG00000138160.5	17.38	16.2	15.85	19.1	18.39	14.84	KIF11	chr10	protein_coding	kinesin family member 11
ENSG00000166225.8	1.39	1.47	1.49	1.33	1.35	1.15	FRS2	chr12	protein_coding	fibroblast growth factor receptor substrate 2
ENSG00000249958.1	0	0.04	0	0	0	0	CCT7P2	chr5	processed_pseudogene	chaperonin containing TCP1, subunit 7 (eta) pseudogene 2
ENSG00000272764.1	2.52	1.55	1.62	1.99	2.85	1.65	RP11-318E3.9	chr10	lincRNA	--
ENSG00000143228.12	13.36	11.71	10.99	13.72	13.09	10.51	NUF2	chr1	protein_coding	NUF2, NDC80 kinetochore complex component
ENSG00000105447.12	11.23	10.44	11.59	11.34	11.12	11.52	GRWD1	chr19	protein_coding	glutamate-rich WD repeat containing 1
ENSG00000278969.1	0	0	0	0	0	0.02	RP11-662I13.3	chr12	TEC	--
ENSG00000196498.13	5.64	8.39	5.93	7.28	8.05	21.75	NCOR2	chr12	protein_coding	nuclear receptor corepressor 2
ENSG00000276121.1	0	0.25	0	0.05	0.05	0	CTD-2008A1.3	chr15	lincRNA	--
ENSG00000279537.1	0	0	0	0	0	0.01	RP11-133K1.8	chr15	TEC	--
ENSG00000095209.11	2.79	2.25	2.35	2.32	2.47	2.04	TMEM38B	chr9	protein_coding	transmembrane protein 38B
ENSG00000224722.3	0.02	0	0.07	0.07	0.07	0.05	RP11-255B23.1	chr8	processed_pseudogene	--
ENSG00000166797.10	23.15	18.45	21.84	21.05	22.41	16.31	FAM96A	chr15	protein_coding	family with sequence similarity 96, member A
ENSG00000253092.1	0.14	0.14	0.15	0.14	0	0.14	SNORA81	chr3	snoRNA	small nucleolar RNA, H/ACA box 81
ENSG00000272076.1	0	0	0	0	0	0.05	RP11-11C20.3	chr8	lincRNA	--
ENSG00000277491.1	0.33	0.33	0.31	0.22	0.39	0.23	RP11-676J12.9	chr17	lincRNA	--
ENSG00000226963.1	0	0	0.11	0	0	0.05	AC078883.4	chr2	antisense	--
ENSG00000079435.9	0.01	0	0.01	0	0.01	0	LIPE	chr19	protein_coding	lipase, hormone-sensitive
ENSG00000144959.9	6.51	5.73	6.2	3.47	3.81	2.94	NCEH1	chr3	protein_coding	neutral cholesterol ester hydrolase 1
ENSG00000274589.1	0	0.09	0.2	0.09	0	0.19	Metazoa_SRP	chr11	misc_RNA	--
ENSG00000243251.5	0.93	0.99	1.09	1.09	1.1	0.72	PGBD3	chr10	protein_coding	piggyBac transposable element derived 3
ENSG00000182013.17	0.11	0.07	0.05	0.04	0.1	0.19	PNMAL1	chr19	protein_coding	paraneoplastic Ma antigen family-like 1
ENSG00000169962.4	0.62	0.51	0.64	0.6	0.61	0.81	TAS1R3	chr1	protein_coding	taste receptor, type 1, member 3
ENSG00000261428.2	0.2	0.24	0.19	0.17	0.15	0.25	RP11-16P6.1	chr2	antisense	--
ENSG00000251520.1	0.1	0	0	0	0	0	RP11-46A10.6	chr1	unprocessed_pseudogene	--
ENSG00000134551.12	0	0	0.04	0	0.04	0.04	PRH2	chr12	protein_coding	proline-rich protein HaeIII subfamily 2
ENSG00000198399.14	1.62	1.66	1.49	1.74	1.85	2.99	ITSN2	chr2	protein_coding	intersectin 2
ENSG00000163166.13	18.36	19.02	18.5	22.03	22.08	23.75	IWS1	chr2	protein_coding	IWS1 homolog (S. cerevisiae)
ENSG00000110651.11	0.06	0.05	0.03	0.03	0.03	0.03	CD81	chr11	protein_coding	CD81 molecule
ENSG00000215045.8	0	0.03	0.01	0	0.02	0.01	GRID2IP	chr7	protein_coding	glutamate receptor, ionotropic, delta 2 (Grid2) interacting protein
ENSG00000257252.5	0.03	0.13	0.11	0.1	0.1	0.03	RP11-486A14.2	chr12	antisense	--
ENSG00000203279.3	3.36	3.09	3.12	2.75	3.26	2.33	RP11-498P14.5	chr9	lincRNA	--
ENSG00000164818.15	10.45	11.36	9.98	11.54	11.68	9.79	DNAAF5	chr7	protein_coding	dynein, axonemal, assembly factor 5
ENSG00000196811.11	0	0.01	0	0	0	0.03	CHRNG	chr2	protein_coding	cholinergic receptor, nicotinic, gamma (muscle)
ENSG00000254793.1	0.03	0.05	0	0	0	0	FDPSP4	chr15	processed_pseudogene	farnesyl diphosphate synthase pseudogene 4
ENSG00000107968.9	4.03	4.75	4.65	4.12	3.84	3.06	MAP3K8	chr10	protein_coding	mitogen-activated protein kinase kinase kinase 8
ENSG00000012963.13	7.48	7.29	8.32	8.18	8.2	5.55	UBR7	chr14	protein_coding	ubiquitin protein ligase E3 component n-recognin 7 (putative)
ENSG00000158470.5	11.83	11.73	12.09	12.89	12.88	12.41	B4GALT5	chr20	protein_coding	UDP-Gal:betaGlcNAc beta 1,4- galactosyltransferase, polypeptide 5
ENSG00000261158.1	0	0.03	0	0	0	0	CTD-2583P5.3	chr16	antisense	--
ENSG00000235010.1	0.03	0	0	0.03	0	0.04	RP11-140A10.3	chr10	antisense	--
ENSG00000226237.1	0	0.02	0	0.01	0.01	0.05	RP11-276H19.1	chr9	lincRNA	--
ENSG00000276110.1	0	0.08	0	0.04	0	0	RP4-790G17.7	chr1	antisense	--
ENSG00000254962.1	0	0	0	0.06	0	0	OR4A14P	chr11	unprocessed_pseudogene	olfactory receptor, family 4, subfamily A, member 14 pseudogene
ENSG00000143742.12	149.23	120.52	135.02	142.89	144.19	104.03	SRP9	chr1	protein_coding	signal recognition particle 9kDa
ENSG00000204388.6	26.58	28.79	27.5	24.64	25.38	27.3	HSPA1B	chr6	protein_coding	heat shock 70kDa protein 1B
ENSG00000127743.5	0.31	0.46	0.43	0.2	0.43	0.29	IL17B	chr5	protein_coding	interleukin 17B
ENSG00000272181.1	0	0	0	0.26	0	0.14	RP11-245J9.6	chr3	antisense	--
ENSG00000233665.8	0	0	0.02	0	0	0	RP11-523O18.5	chr10	processed_transcript	--
ENSG00000085563.14	8.21	7.82	8.35	7.19	7.17	5.8	ABCB1	chr7	protein_coding	ATP-binding cassette, sub-family B (MDR/TAP), member 1
ENSG00000253260.1	0	0	0	0	0	0.08	RP11-379I19.1	chr8	lincRNA	--
ENSG00000197928.10	0.01	0.06	0.05	0.02	0.05	0.09	ZNF677	chr19	protein_coding	zinc finger protein 677
ENSG00000272630.1	0.14	0.19	0.15	0.18	0.18	0.18	RP11-344N10.5	chr10	lincRNA	--
ENSG00000131697.17	2.47	2.85	2.73	2.45	2.43	5.17	NPHP4	chr1	protein_coding	nephronophthisis 4
ENSG00000003137.8	0.09	0.04	0.05	0.1	0.17	0.15	CYP26B1	chr2	protein_coding	cytochrome P450, family 26, subfamily B, polypeptide 1
ENSG00000274500.1	0	0	0	0	0	0.29	MESTIT1_3	chr7	misc_RNA	--
ENSG00000201470.1	0	0	0	0	0.28	0	RNY4P7	chr2	misc_RNA	RNA, Ro-associated Y4 pseudogene 7
ENSG00000171016.11	0.02	0.02	0	0.01	0.03	0.01	PYGO1	chr15	protein_coding	pygopus family PHD finger 1
ENSG00000202111.1	0.9	1.5	2.02	1.54	0.91	1.28	VTRNA1-2	chr5	misc_RNA	vault RNA 1-2
ENSG00000227081.5	3.05	1.79	4.1	2.69	3.93	2.9	RP11-543P15.1	chr12	processed_pseudogene	--
ENSG00000231327.1	0.24	0.08	0.41	0.17	0.12	0.04	AC016700.5	chr2	lincRNA	--
ENSG00000163347.5	20.62	19.73	20.52	15.65	15.14	11.25	CLDN1	chr3	protein_coding	claudin 1
ENSG00000173933.19	3.43	3.39	3.47	3.89	4.19	3.5	RBM4	chr11	protein_coding	RNA binding motif protein 4
ENSG00000172667.10	5.67	5.91	5.72	5.62	5.34	4.78	ZMAT3	chr3	protein_coding	zinc finger, matrin-type 3
ENSG00000111786.8	124.62	115.92	122.8	140.15	141.67	116.92	SRSF9	chr12	protein_coding	serine/arginine-rich splicing factor 9
ENSG00000133657.14	4.13	4.02	3.83	3.39	3.85	2.71	ATP13A3	chr3	protein_coding	ATPase type 13A3
ENSG00000176383.8	0.1	0.11	0.15	0.07	0.09	0.13	B3GNT4	chr12	protein_coding	UDP-GlcNAc:betaGal beta-1,3-N-acetylglucosaminyltransferase 4
ENSG00000260249.2	0.05	0.04	0.09	0.06	0.04	0.01	RP11-401P9.5	chr16	antisense	--
ENSG00000160145.15	0.32	0.27	0.3	0.35	0.35	0.45	KALRN	chr3	protein_coding	kalirin, RhoGEF kinase
ENSG00000108587.14	5.22	5.22	4.92	5.07	5.11	5.42	GOSR1	chr17	protein_coding	golgi SNAP receptor complex member 1
ENSG00000269604.1	0.03	0.02	0.01	0.03	0.02	0.02	AC005523.2	chr19	antisense	--
ENSG00000213977.7	72.42	69.8	82.85	94.47	97.45	78.86	TAX1BP3	chr17	protein_coding	Tax1 (human T-cell leukemia virus type I) binding protein 3
ENSG00000257165.5	0	0	0	0	0	0.04	RP11-171L9.1	chr12	lincRNA	--
ENSG00000223612.3	0	0	0	0	0	0.05	RP11-289I10.2	chr1	processed_pseudogene	--
ENSG00000189430.12	0.02	0.05	0.02	0.03	0.07	0.1	NCR1	chr19	protein_coding	natural cytotoxicity triggering receptor 1
ENSG00000128849.10	1.67	1.82	1.81	2.06	1.8	4.42	CGNL1	chr15	protein_coding	cingulin-like 1
ENSG00000228403.1	0.1	0	0	0	0	0	RP11-563N6.6	chr10	sense_intronic	--
ENSG00000244300.2	2.32	1.81	2.55	2.65	2.21	3.18	GATA2-AS1	chr3	antisense	GATA2 antisense RNA 1
ENSG00000145214.13	2.39	3.2	2.97	3.17	3.47	4.95	DGKQ	chr4	protein_coding	diacylglycerol kinase, theta 110kDa
ENSG00000234345.2	0	0	0.03	0	0	0.03	LL0XNC01-116E7.1	chrX	processed_pseudogene	--
ENSG00000221819.5	0	0	0	0	0	0.07	GAS8-AS1	chr16	antisense	GAS8 antisense RNA 1
ENSG00000153048.10	46.94	40.65	48.66	44.44	43.43	37.72	CARHSP1	chr16	protein_coding	calcium regulated heat stable protein 1, 24kDa
ENSG00000250448.1	0	0	0	0	0	0.01	RP11-19O2.2	chr5	antisense	--
ENSG00000229556.2	0	0.13	0	0.04	0.03	0.08	RP11-363G2.4	chr13	lincRNA	--
ENSG00000175602.3	23.37	22.53	28.87	31.76	31.53	29.63	CCDC85B	chr11	protein_coding	coiled-coil domain containing 85B
ENSG00000269151.1	0.71	0.85	0.32	0.44	0.58	0.15	AC007193.8	chr19	antisense	--
ENSG00000240758.2	0.36	0.2	0.09	0.17	0.12	0.21	RP11-155G14.6	chr7	processed_transcript	--
ENSG00000169118.15	1.55	1.79	1.56	2.22	2.4	2.39	CSNK1G1	chr15	protein_coding	casein kinase 1, gamma 1
ENSG00000170153.10	0	0	0	0.01	0	0	RNF150	chr4	protein_coding	ring finger protein 150
ENSG00000169032.9	11.87	12.06	11.98	10.25	11.06	9.04	MAP2K1	chr15	protein_coding	mitogen-activated protein kinase kinase 1
ENSG00000110719.9	12.23	14.59	15.09	9.25	10.88	12.71	TCIRG1	chr11	protein_coding	T-cell, immune regulator 1, ATPase, H+ transporting, lysosomal V0 subunit A3
ENSG00000156802.12	12.8	12.29	12.08	12.82	12.92	10.09	ATAD2	chr8	protein_coding	ATPase family, AAA domain containing 2
ENSG00000274937.1	0	0	0	0	0	0.03	CTD-2311M21.4	chr15	lincRNA	--
ENSG00000234678.1	2.04	1.69	2.14	0.65	0.84	1.05	RP11-465N4.4	chr1	antisense	--
ENSG00000266109.1	0	0	0	0	0	0.29	MIR4440	chr2	miRNA	microRNA 4440
ENSG00000129354.11	31.78	26.61	31.88	22.77	21.24	16.7	AP1M2	chr19	protein_coding	adaptor-related protein complex 1, mu 2 subunit
ENSG00000146755.10	3.27	3.59	4.08	1.42	1.5	1.12	TRIM50	chr7	protein_coding	tripartite motif containing 50
ENSG00000197380.10	0.05	0.07	0.06	0.05	0.07	0.07	DACT3	chr19	protein_coding	dishevelled-binding antagonist of beta-catenin 3
ENSG00000135821.16	22.94	22.53	23.08	19.03	18.58	14.04	GLUL	chr1	protein_coding	glutamate-ammonia ligase
ENSG00000029363.15	14.53	13.57	13.95	14.94	14.92	12.46	BCLAF1	chr6	protein_coding	BCL2-associated transcription factor 1
ENSG00000132646.10	292.2	252.11	284.35	276.51	259.38	197.8	PCNA	chr20	protein_coding	proliferating cell nuclear antigen
ENSG00000257985.1	0	0	0	0	0.01	0.01	RP1-228P16.4	chr12	antisense	--
ENSG00000127022.14	104.63	100.8	100.11	97.25	95.36	85.64	CANX	chr5	protein_coding	calnexin
ENSG00000251685.3	0.08	0.08	0.13	0.08	0.07	0.05	UGT2B27P	chr4	unprocessed_pseudogene	UDP glucuronosyltransferase 2 family, polypeptide B27 pseudogene
ENSG00000162419.12	1.28	1.49	1.49	1.34	1.49	1.82	GMEB1	chr1	protein_coding	glucocorticoid modulatory element binding protein 1
ENSG00000206417.8	0.87	0.94	0.63	0.7	0.9	1.21	H1FX-AS1	chr3	antisense	H1FX antisense RNA 1
ENSG00000248208.1	0	0	0	0	0.1	0.16	RP11-153M7.1	chr4	processed_pseudogene	--
ENSG00000162399.6	0.07	0.02	0.03	0.01	0.02	0.02	BSND	chr1	protein_coding	barttin CLCNK-type chloride channel accessory beta subunit
ENSG00000129351.17	33.47	36.99	34.23	39.76	39.7	58.28	ILF3	chr19	protein_coding	interleukin enhancer binding factor 3, 90kDa
ENSG00000243854.3	0	0.09	0	0	0	0	RN7SL67P	chr12	misc_RNA	RNA, 7SL, cytoplasmic 67, pseudogene
ENSG00000016391.10	12.51	13.48	12.95	10.54	10.8	12.84	CHDH	chr3	protein_coding	choline dehydrogenase
ENSG00000168778.11	2.27	2.57	2.24	2.74	3.08	2.52	TCTN2	chr12	protein_coding	tectonic family member 2
ENSG00000237343.1	0.34	0.17	0.29	0.17	0	0.18	RP11-763B22.4	chr1	lincRNA	--
ENSG00000243508.1	0	0	0	0	0.08	0.04	RP11-775J23.2	chr3	processed_pseudogene	--
ENSG00000154845.15	12.99	13.15	13.76	14.83	14.93	10.36	PPP4R1	chr18	protein_coding	protein phosphatase 4, regulatory subunit 1
ENSG00000280249.1	0	0	0	0	0	0.53	AL691477.1	chrX	pseudogene	--
ENSG00000163638.13	0	0	0	0	0.01	0.03	ADAMTS9	chr3	protein_coding	ADAM metallopeptidase with thrombospondin type 1 motif, 9
ENSG00000266767.1	0.4	0.15	0.28	0.16	0.12	0.2	RP11-678G15.2	chr18	antisense	--
ENSG00000163827.12	0.38	0.36	0.28	0.32	0.4	0.38	LRRC2	chr3	protein_coding	leucine rich repeat containing 2
ENSG00000145391.13	0.05	0.07	0.06	0.25	0.28	0.24	SETD7	chr4	protein_coding	SET domain containing (lysine methyltransferase) 7
ENSG00000171557.16	236.31	219.89	202.15	256.59	219.04	158.54	FGG	chr4	protein_coding	fibrinogen gamma chain
ENSG00000280402.1	0.2	0.39	0.42	0.05	0.21	0.34	RP11-20I23.10	chr16	TEC	--
ENSG00000101940.17	4.21	4.27	4.99	4.45	4.86	4.87	WDR13	chrX	protein_coding	WD repeat domain 13
ENSG00000229659.1	1.1	0.98	1.09	1.31	1.3	0.84	RP11-345K20.2	chr10	processed_pseudogene	--
ENSG00000254985.1	0.09	0.33	0.11	0.1	0.19	0.2	RSF1-IT2	chr11	sense_intronic	RSF1 intronic transcript 2
ENSG00000235411.1	0.02	0.14	0.08	0.07	0	0.02	AC007041.2	chr2	processed_pseudogene	--
ENSG00000230838.1	0.08	0	0	0	0	0	AC093850.2	chr2	lincRNA	--
ENSG00000139973.15	0	0	0	0	0	0.01	SYT16	chr14	protein_coding	synaptotagmin XVI
ENSG00000173727.11	0.78	0.65	0.73	0.54	0.57	0.77	CMB9-22P13.1	chr11	lincRNA	--
ENSG00000184319.15	3.08	3.07	3.62	4.36	4.44	3.48	RPL23AP82	chr22	transcribed_unprocessed_pseudogene	ribosomal protein L23a pseudogene 82
ENSG00000131748.15	24.9	24.83	27.04	25.6	27.16	25.84	STARD3	chr17	protein_coding	StAR-related lipid transfer (START) domain containing 3
ENSG00000213923.10	12.13	12.05	12.64	15.94	16.56	18.41	CSNK1E	chr22	protein_coding	casein kinase 1, epsilon
ENSG00000246985.7	0.48	0.51	0.6	0.71	0.77	0.7	SOCS2-AS1	chr12	processed_transcript	SOCS2 antisense RNA 1
ENSG00000218426.5	0.6	0.12	0.67	0.55	0.49	0.06	RP11-475C16.1	chr6	processed_pseudogene	--
ENSG00000143847.15	0.04	0.02	0.02	0.02	0.01	0.06	PPFIA4	chr1	protein_coding	protein tyrosine phosphatase, receptor type, f polypeptide (PTPRF), interacting protein (liprin), alpha 4
ENSGR0000182378.12	0	0	0.01	0	0	0.01	PLCXD1	chrY	protein_coding	phosphatidylinositol-specific phospholipase C, X domain containing 1
ENSG00000159674.11	9.08	9.02	11.06	8.13	8.9	8.12	SPON2	chr4	protein_coding	spondin 2, extracellular matrix protein
ENSG00000196090.12	0	0.01	0	0	0	0.01	PTPRT	chr20	protein_coding	protein tyrosine phosphatase, receptor type, T
ENSG00000165661.15	7.2	8.16	7.93	8.23	8.92	9.45	QSOX2	chr9	protein_coding	quiescin Q6 sulfhydryl oxidase 2
ENSG00000110031.12	0.95	0.92	0.77	1.34	1.36	1.11	LPXN	chr11	protein_coding	leupaxin
ENSG00000164591.13	0	0	0	0	0	0.01	MYOZ3	chr5	protein_coding	myozenin 3
ENSG00000060140.8	0	0	0	0	0.01	0	STYK1	chr12	protein_coding	serine/threonine/tyrosine kinase 1
ENSG00000265121.1	0	0.09	0	0	0	0	RP11-285E9.5	chr17	lincRNA	--
ENSG00000001629.9	3.09	3.15	3.25	3.26	3.53	3.3	ANKIB1	chr7	protein_coding	ankyrin repeat and IBR domain containing 1
ENSG00000169894.17	0.04	0.05	0.04	0.01	0.03	0.02	MUC3A	chr7	protein_coding	mucin 3A, cell surface associated
ENSG00000173273.15	2.28	2.42	2.22	2.42	2.39	2.28	TNKS	chr8	protein_coding	tankyrase, TRF1-interacting ankyrin-related ADP-ribose polymerase
ENSG00000280394.1	0	0	0.07	0.14	0	0.07	CTC-503J8.8	chr19	TEC	--
ENSG00000261093.1	0.03	0.03	0.02	0	0.06	0.05	CTD-3126B10.1	chr16	antisense	--
ENSG00000234129.7	0.24	0.23	0.09	0.24	0.18	0.1	RP11-120D5.1	chrX	lincRNA	--
ENSG00000204922.4	5.93	5.26	7.27	8.2	8.6	7.63	UQCC3	chr11	protein_coding	ubiquinol-cytochrome c reductase complex assembly factor 3
ENSG00000255130.1	0	0.05	0	0.05	0	0	RP11-396J6.1	chr8	antisense	--
ENSG00000149633.11	0.02	0.02	0.03	0.01	0.02	0.02	KIAA1755	chr20	protein_coding	KIAA1755
ENSG00000152782.16	2.69	2.71	2.49	2.56	2.46	1.92	PANK1	chr10	protein_coding	pantothenate kinase 1
ENSG00000197119.12	1.42	1.89	1.9	2.38	2.87	3.93	SLC25A29	chr14	protein_coding	solute carrier family 25 (mitochondrial carnitine/acylcarnitine carrier), member 29
ENSG00000095485.16	18.08	16.28	19.49	18.38	17.78	19.69	CWF19L1	chr10	protein_coding	CWF19-like 1, cell cycle control (S. pombe)
ENSG00000256847.1	0.03	0	0	0	0	0	CCND2P1	chr11	processed_pseudogene	cyclin D2 pseudogene 1
ENSG00000108784.9	12.96	12.96	13.82	17.04	16.76	16.74	NAGLU	chr17	protein_coding	N-acetylglucosaminidase, alpha
ENSG00000105825.11	0.01	0.02	0.04	0	0.02	0.01	TFPI2	chr7	protein_coding	tissue factor pathway inhibitor 2
ENSG00000113248.5	0.03	0.01	0.01	0.01	0.03	0.01	PCDHB15	chr5	protein_coding	protocadherin beta 15
ENSG00000127720.7	2.25	1.98	2.07	2.59	1.8	1.55	METTL25	chr12	protein_coding	methyltransferase like 25
ENSG00000281333.1	0.33	0.05	0.49	0.44	0.22	0.17	RP11-900F13.3	chr12	antisense	--
ENSG00000143226.13	0.01	0	0	0.01	0	0.01	FCGR2A	chr1	protein_coding	Fc fragment of IgG, low affinity IIa, receptor (CD32)
ENSG00000164885.12	17.43	15.9	18.62	18.92	17.85	13.55	CDK5	chr7	protein_coding	cyclin-dependent kinase 5
ENSG00000174238.14	12.71	13.61	12.83	15.36	15.26	13.01	PITPNA	chr17	protein_coding	phosphatidylinositol transfer protein, alpha
ENSG00000164088.17	1.08	1.38	1.36	1.72	2.13	2.08	PPM1M	chr3	protein_coding	protein phosphatase, Mg2+/Mn2+ dependent, 1M
ENSG00000151233.10	2.92	2.52	2.56	3.11	3.4	2.42	GXYLT1	chr12	protein_coding	glucoside xylosyltransferase 1
ENSG00000211645.2	0.07	0	0	0	0	0	IGLV1-50	chr22	IG_V_gene	immunoglobulin lambda variable 1-50 (non-functional)
ENSG00000274308.1	0	0.26	0.07	0.03	0.1	0.14	RP11-19G24.1	chr17	processed_pseudogene	--
ENSG00000280634.1	0.01	0.05	0.05	0.04	0.07	0.06	THRIL	chr12	antisense	TNF and HNRNPL related immunoregulatory long non-coding RNA
ENSG00000245105.2	0.38	0.43	0.3	0.6	0.37	0.35	A2M-AS1	chr12	antisense	A2M antisense RNA 1 (head to head)
ENSG00000259098.1	0.08	0.11	0	0.08	0.08	0.2	RP11-603B24.2	chr15	processed_pseudogene	--
ENSG00000259264.5	0.01	0	0.02	0	0	0.02	RP11-60L3.1	chr15	antisense	--
ENSG00000170190.15	3.34	4.23	4.59	3.7	4.54	6.21	SLC16A5	chr17	protein_coding	solute carrier family 16 (monocarboxylate transporter), member 5
ENSG00000275221.1	0.07	0	0.15	0	0.28	0.36	HIST1H2AK	chr6	protein_coding	histone cluster 1, H2ak
ENSG00000126767.17	0.8	1.1	1.07	1.07	1.05	0.82	ELK1	chrX	protein_coding	ELK1, member of ETS oncogene family
ENSG00000111897.6	32.79	30.76	36.35	37.69	37.98	28.76	SERINC1	chr6	protein_coding	serine incorporator 1
ENSG00000206418.3	10.78	11.1	11.53	12.08	12.89	9.43	RAB12	chr18	protein_coding	RAB12, member RAS oncogene family
ENSG00000249755.2	0	0	0	0	0	0.04	RP11-466G12.2	chr4	processed_pseudogene	--
ENSG00000233539.5	0	0	0.01	0	0	0.02	AC011294.3	chr7	lincRNA	--
ENSG00000260251.1	0.11	0.11	0.12	0.11	0.04	0.19	RP11-46D6.4	chr16	unprocessed_pseudogene	--
ENSG00000128699.13	11.7	12.43	11.3	12.22	12.4	10.21	ORMDL1	chr2	protein_coding	ORMDL sphingolipid biosynthesis regulator 1
ENSG00000168061.13	29.75	28.74	31.23	30.47	30.37	26.35	SAC3D1	chr11	protein_coding	SAC3 domain containing 1
ENSG00000244131.2	0	0	0	0.08	0	0	RPSAP51	chr12	processed_pseudogene	ribosomal protein SA pseudogene 51
ENSG00000176102.11	10.04	9	9.84	12.63	12.26	9.51	CSTF3	chr11	protein_coding	cleavage stimulation factor, 3' pre-RNA, subunit 3, 77kDa
ENSG00000171940.13	3.57	3.46	3.31	3.45	3.58	4.11	ZNF217	chr20	protein_coding	zinc finger protein 217
ENSG00000166598.12	169.59	166.95	153.25	152.31	151.09	123.33	HSP90B1	chr12	protein_coding	heat shock protein 90kDa beta (Grp94), member 1
ENSG00000153201.15	6.09	6.55	6.24	6.69	6.77	6.51	RANBP2	chr2	protein_coding	RAN binding protein 2
ENSG00000236279.6	0.51	0.39	0.53	0.73	0.56	0.69	CLEC2L	chr7	protein_coding	C-type lectin domain family 2, member L
ENSG00000265912.1	0	0	0.01	0	0	0.02	RP11-583F2.2	chr17	lincRNA	--
ENSG00000136295.14	69.24	83	76.97	68.62	70.8	77.59	TTYH3	chr7	protein_coding	tweety family member 3
ENSG00000214135.8	2.19	2.68	2.42	2.19	2.12	2.47	AC024560.3	chr3	transcribed_unprocessed_pseudogene	--
ENSG00000021852.12	0.36	0.38	0.42	0.1	0.15	0.14	C8B	chr1	protein_coding	complement component 8, beta polypeptide
ENSG00000266283.1	0.07	0	0	0	0	0	RP11-627G18.1	chr18	antisense	--
ENSG00000183801.7	0	0	0.01	0	0	0	OLFML1	chr11	protein_coding	olfactomedin-like 1
ENSG00000273825.1	0	0	0	0.01	0	0	CH17-164J11.1	chr1	unprocessed_pseudogene	--
ENSG00000138386.16	2.67	2.49	2.43	2.65	2.9	2.56	NAB1	chr2	protein_coding	NGFI-A binding protein 1 (EGR1 binding protein 1)
ENSG00000139233.6	5.06	4.52	4.84	5.57	5.17	4.42	LLPH	chr12	protein_coding	LLP homolog, long-term synaptic facilitation (Aplysia)
ENSG00000271997.1	0.1	0.12	0.03	0.1	0.13	0.06	RP11-97O12.6	chr15	sense_intronic	--
ENSG00000264991.1	0	0	0	0	0	1.65	AP001205.1	chr8	miRNA	--
ENSG00000147697.8	0.01	0.01	0	0	0	0.02	GSDMC	chr8	protein_coding	gasdermin C
ENSG00000235453.7	1.98	1.31	2.01	2.32	2.23	2.15	TOPORS-AS1	chr9	antisense	TOPORS antisense RNA 1
ENSG00000109220.10	7.92	6.62	8.56	10.21	9.76	8.29	CHIC2	chr4	protein_coding	cysteine-rich hydrophobic domain 2
ENSG00000262003.1	0.16	0.07	0.18	0.2	0.1	0	RP11-676J12.7	chr17	antisense	--
ENSG00000280076.1	0	0.01	0	0	0.01	0.06	RP11-326A13.2	chr15	TEC	--
ENSG00000254779.4	0.04	0.07	0.2	0.11	0.32	0.34	EGLN1P1	chr15	transcribed_processed_pseudogene	egl-9 family hypoxia-inducible factor 1 pseudogene 1
ENSG00000228835.1	0.11	0.23	0.18	0.2	0.16	0.15	AC012123.1	chr18	antisense	--
ENSG00000137331.11	55.29	53.28	57.98	60.05	63.13	52.96	IER3	chr6	protein_coding	immediate early response 3
ENSG00000165244.6	1.75	2.08	1.81	2.16	2.2	1.73	ZNF367	chr9	protein_coding	zinc finger protein 367
ENSG00000251380.3	0	0.02	0	0	0	0.01	DCANP1	chr5	protein_coding	dendritic cell-associated nuclear protein
ENSG00000166037.10	6.32	5.82	5.94	7.08	7.61	5.18	CEP57	chr11	protein_coding	centrosomal protein 57kDa
ENSG00000227383.1	0	0.16	0	0	0	0.35	RP11-571F15.2	chr9	processed_pseudogene	--
ENSG00000132840.9	27.81	27.85	29.43	12.64	10.54	10.35	BHMT2	chr5	protein_coding	betaine--homocysteine S-methyltransferase 2
ENSG00000134759.13	5.11	5.26	4.98	5.07	5.18	3.9	ELP2	chr18	protein_coding	elongator acetyltransferase complex subunit 2
ENSG00000169919.16	17.22	18.66	17.7	20.24	20.44	18.36	GUSB	chr7	protein_coding	glucuronidase, beta
ENSG00000228205.1	0.04	0	0.04	0	0	0	RP11-778D9.4	chr3	processed_pseudogene	--
ENSG00000015413.9	40.18	39.44	46.26	23.79	22.9	19.21	DPEP1	chr16	protein_coding	dipeptidase 1 (renal)
ENSG00000232526.1	0	0.03	0.03	0	0.03	0	VDAC1P13	chr2	processed_pseudogene	voltage-dependent anion channel 1 pseudogene 13
ENSG00000260672.1	0.02	0.01	0	0.01	0.01	0.05	RP11-1006G14.1	chr15	lincRNA	--
ENSG00000122691.12	0.02	0	0	0	0	0	TWIST1	chr7	protein_coding	twist family bHLH transcription factor 1
ENSG00000243742.5	0.2	0.24	0.28	0.18	0.22	0.19	RPLP0P2	chr11	transcribed_processed_pseudogene	ribosomal protein, large, P0 pseudogene 2
ENSG00000164647.8	23.05	17.21	21.26	21.7	24.07	16.47	STEAP1	chr7	protein_coding	six transmembrane epithelial antigen of the prostate 1
ENSG00000102763.15	2.58	2.51	2.61	2.74	2.81	2.43	VWA8	chr13	protein_coding	von Willebrand factor A domain containing 8
ENSG00000186409.14	0.06	0.03	0.02	0.02	0.07	0.08	CCDC30	chr1	protein_coding	coiled-coil domain containing 30
ENSG00000258137.5	0	0.03	0	0	0	0	RP11-753H16.3	chr12	antisense	--
ENSG00000060982.14	0.35	0.33	0.27	0.24	0.22	0.2	BCAT1	chr12	protein_coding	branched chain amino-acid transaminase 1, cytosolic
ENSG00000101868.10	2.86	2.91	2.8	3.23	3.21	3.03	POLA1	chrX	protein_coding	polymerase (DNA directed), alpha 1, catalytic subunit
ENSG00000228526.3	0.13	0.59	0.22	0.07	0.13	1.04	RP3-510D11.1	chr1	lincRNA	--
ENSG00000261243.1	0	0	0	0	0	0.1	RP11-517C16.4	chr16	antisense	--
ENSG00000174015.9	0	0	0	0.04	0.03	0.01	SPERT	chr13	protein_coding	spermatid associated
ENSG00000201564.1	0	0	0	0	0	0.09	RN7SKP50	chr11	misc_RNA	RNA, 7SK small nuclear pseudogene 50
ENSG00000231175.1	0.01	0	0.01	0	0	0	RP11-463J7.2	chr1	lincRNA	--
ENSG00000124818.14	0.01	0	0	0	0	0	OPN5	chr6	protein_coding	opsin 5
ENSG00000226251.5	0.22	0.3	0	0	0	0	RP11-15I11.3	chr1	lincRNA	--
ENSG00000205790.1	0.01	0.01	0	0.01	0.01	0	DPP9-AS1	chr19	antisense	DPP9 antisense RNA 1
ENSG00000234287.1	0	0.21	0	0.11	0.11	0	RP11-761N21.2	chr3	processed_pseudogene	--
ENSG00000100532.11	3.05	3.31	3.47	2.73	2.16	2.03	CGRRF1	chr14	protein_coding	cell growth regulator with ring finger domain 1
ENSG00000183598.3	0	0.07	0	0	0.07	0.48	HIST2H3D	chr1	protein_coding	histone cluster 2, H3d
ENSG00000267454.5	0	0	0.02	0.02	0	0	ZNF582-AS1	chr19	lincRNA	ZNF582 antisense RNA 1 (head to head)
ENSG00000167613.15	0.05	0.07	0.06	0.05	0.01	0.12	LAIR1	chr19	protein_coding	leukocyte-associated immunoglobulin-like receptor 1
ENSG00000243568.2	0.13	0.2	0.19	0.31	0.07	0.36	RP11-2I17.1	chr15	processed_pseudogene	--
ENSG00000157870.14	26.42	25.63	26.5	28.11	28.22	28.85	FAM213B	chr1	protein_coding	family with sequence similarity 213, member B
ENSG00000121380.12	0.06	0.08	0.07	0.08	0.04	0.01	BCL2L14	chr12	protein_coding	BCL2-like 14 (apoptosis facilitator)
ENSG00000125798.14	17.2	18.42	17.71	17.13	17.19	14.16	FOXA2	chr20	protein_coding	forkhead box A2
ENSG00000228801.5	1.12	0.94	0.99	1.41	1.49	1.03	RP11-110G21.1	chr8	antisense	--
ENSG00000252367.1	0.88	0.59	0.99	0.3	0.3	0.31	Y_RNA	chr20	misc_RNA	--
ENSG00000132821.11	0	0.01	0.02	0	0.03	0.01	VSTM2L	chr20	protein_coding	V-set and transmembrane domain containing 2 like
ENSG00000249562.1	0.1	0	0	0	0	0	RP11-116O11.2	chr5	processed_pseudogene	--
ENSG00000162521.18	24.96	24.49	23.7	27.18	26.21	20.51	RBBP4	chr1	protein_coding	retinoblastoma binding protein 4
ENSG00000256196.1	0	0.03	0	0	0	0	RP11-881M11.4	chr11	antisense	--
ENSG00000256973.1	0	0.04	0	0.04	0.04	0.12	RP11-359J14.2	chr12	lincRNA	--
ENSG00000254911.3	1.59	1.52	1.19	1.09	1.54	3.3	SCARNA9	chr11	antisense	small Cajal body-specific RNA 9
ENSG00000141441.15	0.6	0.57	0.44	0.43	0.38	0.38	GAREM	chr18	protein_coding	GRB2 associated, regulator of MAPK1
ENSG00000113262.14	0.02	0.05	0.03	0	0.03	0.02	GRM6	chr5	protein_coding	glutamate receptor, metabotropic 6
ENSG00000132405.18	9.98	10.21	10.2	9.57	9.59	10.47	TBC1D14	chr4	protein_coding	TBC1 domain family, member 14
ENSG00000249996.1	0	0.1	0	0	0.05	0.05	RP11-359P5.1	chr5	antisense	--
ENSG00000185264.11	0	0.02	0	0	0	0	TEX33	chr22	protein_coding	testis expressed 33
ENSG00000260364.1	0.07	0.07	0	0.04	0.03	0.29	RP11-256I9.3	chr16	lincRNA	--
ENSG00000233013.8	0.02	0	0.02	0	0	0	FAM157B	chr9	lincRNA	family with sequence similarity 157, member B
ENSG00000269220.1	2.69	2.31	2.44	2.93	2.89	2.6	LINC00528	chr22	lincRNA	long intergenic non-protein coding RNA 528
ENSG00000265980.1	0	0	0	0.06	0	0	CTD-2515C13.2	chr18	lincRNA	--
ENSG00000137770.13	2.98	2.67	2.77	3.04	3.15	2.48	CTDSPL2	chr15	protein_coding	CTD (carboxy-terminal domain, RNA polymerase II, polypeptide A) small phosphatase like 2
ENSG00000266803.1	0.04	0.08	0.17	0.04	0	0.29	RP1-77H15.1	chr17	sense_intronic	--
ENSG00000117266.15	9.5	11.08	11.1	11.39	11.82	13.93	CDK18	chr1	protein_coding	cyclin-dependent kinase 18
ENSG00000123584.7	0	0	0	0	0.01	0.02	MAGEA9	chrX	protein_coding	melanoma antigen family A9
ENSG00000120675.5	8.51	7.09	8.2	8.29	8.15	6.51	DNAJC15	chr13	protein_coding	DnaJ (Hsp40) homolog, subfamily C, member 15
ENSG00000163576.17	0.04	0.04	0.09	0.01	0.01	0.03	EFHB	chr3	protein_coding	EF-hand domain family, member B
ENSG00000264961.1	0	0	0.39	0	0	0.37	MIR4730	chr17	miRNA	microRNA 4730
ENSG00000013583.8	21.84	19.1	21.44	20.34	18.63	15.91	HEBP1	chr12	protein_coding	heme binding protein 1
ENSG00000267606.1	0	0	0	0	0	0.17	AC006116.21	chr19	lincRNA	--
ENSG00000072609.17	2.02	2.33	2.55	2.81	3.26	3.28	CHFR	chr12	protein_coding	checkpoint with forkhead and ring finger domains, E3 ubiquitin protein ligase
ENSG00000262099.1	0	0	0.08	0	0	0	CTC-524C5.5	chr17	lincRNA	--
ENSG00000254783.1	0.43	0.29	0.28	0.22	0.4	0.61	RP11-320L11.2	chr11	processed_pseudogene	--
ENSG00000277959.1	2.34	3.15	2.79	2.48	2.78	3.17	RP11-45A17.2	chr10	antisense	--
ENSG00000198944.5	0.01	0.03	0.03	0.01	0.07	0.02	SOWAHA	chr5	protein_coding	sosondowah ankyrin repeat domain family member A
ENSG00000281620.1	0	0	0.25	0	0	0	AC006445.1	chr4	protein_coding	--
ENSG00000196139.11	207.84	171.03	237.97	180.04	153.26	116.64	AKR1C3	chr10	protein_coding	aldo-keto reductase family 1, member C3
ENSG00000229120.2	0	0	0	0.08	0	0	CYCSP4	chr1	processed_pseudogene	cytochrome c, somatic pseudogene 4
ENSG00000255823.2	0	0.02	0.05	0.02	0.02	0.02	MTRNR2L8	chr11	protein_coding	MT-RNR2-like 8
ENSG00000204872.3	0.12	0.08	0.26	0.12	0.08	0.13	NAT8B	chr2	polymorphic_pseudogene	N-acetyltransferase 8B (GCN5-related, putative, gene/pseudogene)
ENSG00000073803.13	2.16	1.9	1.99	2.07	2.03	2.05	MAP3K13	chr3	protein_coding	mitogen-activated protein kinase kinase kinase 13
ENSG00000232774.7	1.07	1.47	1.11	1.13	1.14	1.41	FLJ22447	chr14	lincRNA	--
ENSG00000152049.6	0	0	0	0.02	0	0.01	KCNE4	chr2	protein_coding	potassium channel, voltage gated subfamily E regulatory beta subunit 4
ENSG00000233184.6	0.63	0.56	0.64	1.23	1.4	0.99	RP11-421L21.3	chr1	antisense	--
ENSG00000129007.14	2.49	2.51	2.67	2.27	2.22	1.9	CALML4	chr15	protein_coding	calmodulin-like 4
ENSG00000233084.2	0.06	0.12	0	0.18	0	0	RPL23AP25	chr1	processed_pseudogene	ribosomal protein L23a pseudogene 25
ENSG00000249094.2	0.07	0.11	0.04	0	0	0.35	RP1-7G5.6	chr12	lincRNA	--
ENSG00000198804.2	13587.9	14135.8	13406.5	14287.8	14349.2	10300.8	MT-CO1	chrM	protein_coding	mitochondrially encoded cytochrome c oxidase I
ENSG00000132952.11	1.78	2.15	1.9	2.36	2.48	1.82	USPL1	chr13	protein_coding	ubiquitin specific peptidase like 1
ENSG00000198677.10	5.33	5.37	5.72	5.39	5.29	4.49	TTC37	chr5	protein_coding	tetratricopeptide repeat domain 37
ENSG00000114503.10	29.92	29.02	29.19	26.48	26.6	23.07	NCBP2	chr3	protein_coding	nuclear cap binding protein subunit 2, 20kDa
ENSG00000183742.12	0.01	0.04	0.01	0.01	0.01	0.05	MACC1	chr7	protein_coding	metastasis associated in colon cancer 1
ENSG00000239040.1	0.26	0	0	0.8	0	0.55	Y_RNA	chr4	misc_RNA	--
ENSG00000071564.14	10.14	10.5	9.75	16.39	15.71	16.44	TCF3	chr19	protein_coding	transcription factor 3
ENSG00000171136.6	0.04	0.04	0	0.04	0	0	RLN3	chr19	protein_coding	relaxin 3
ENSG00000233440.2	0	0	0.08	0	0	0	HMGA1P6	chr13	processed_pseudogene	high mobility group AT-hook 1 pseudogene 6
ENSG00000087245.12	0.03	0.06	0.04	0.08	0.14	0.04	MMP2	chr16	protein_coding	matrix metallopeptidase 2
ENSG00000270165.1	0.09	0.24	0.05	0.05	0.05	0.65	RP11-167P11.2	chr16	sense_intronic	--
ENSG00000139988.9	0.78	0.64	1.01	0.6	0.52	0.33	RDH12	chr14	protein_coding	retinol dehydrogenase 12 (all-trans/9-cis/11-cis)
ENSG00000265208.2	0	0	0	0.32	0	0	AC015600.1	chr11	miRNA	--
ENSG00000253607.1	0.04	0	0	0	0	0	RP11-557C18.3	chr8	antisense	--
ENSG00000222627.1	0	0	0	0	0	0.16	RNU2-37P	chr3	snRNA	RNA, U2 small nuclear 37, pseudogene
ENSG00000225328.1	0	0	0	0.04	0	0	LINC01594	chr2	antisense	long intergenic non-protein coding RNA 1594
ENSG00000237522.1	0.3	0.41	0.53	0.36	0.53	0.86	NONOP2	chr2	processed_pseudogene	non-POU domain containing, octamer-binding pseudogene 2
ENSG00000261390.5	0	0	0	0.01	0	0.01	MAFTRR	chr16	lincRNA	MAF transcriptional regulator RNA
ENSG00000266783.1	0.59	0.15	0.4	0.44	0.26	0.65	RP11-715F3.2	chr18	sense_intronic	--
ENSG00000204271.10	0.22	0.15	0.14	0.17	0.15	0.85	SPIN3	chrX	protein_coding	spindlin family, member 3
ENSG00000106952.7	0	0.01	0	0	0	0	TNFSF8	chr9	protein_coding	tumor necrosis factor (ligand) superfamily, member 8
ENSG00000270996.1	0.15	0.18	0.23	0.24	0.15	0.19	RP11-342K6.4	chr2	lincRNA	--
ENSG00000177984.6	97.94	86.77	98.23	104.01	87.01	79.69	LCN15	chr9	protein_coding	lipocalin 15
ENSG00000104660.17	11.37	10.91	10.97	10.12	9.75	7.72	LEPROTL1	chr8	protein_coding	leptin receptor overlapping transcript-like 1
ENSG00000104866.10	8.76	9.47	9.9	11.67	12.84	20.93	PPP1R37	chr19	protein_coding	protein phosphatase 1, regulatory subunit 37
ENSG00000188559.13	0.66	0.98	0.77	0.65	0.78	4.4	RALGAPA2	chr20	protein_coding	Ral GTPase activating protein, alpha subunit 2 (catalytic)
ENSG00000253739.1	0	0.25	0	0	0	0	RNU6-323P	chr8	snRNA	RNA, U6 small nuclear 323, pseudogene
ENSG00000144589.20	4.39	4.53	4.9	4.37	4.63	6.86	STK11IP	chr2	protein_coding	serine/threonine kinase 11 interacting protein
ENSG00000255210.1	0.04	0	0	0	0	0	RP11-344L21.1	chr11	processed_pseudogene	--
ENSG00000237149.5	2.8	2.68	2.95	4.07	4.21	4.1	ZNF503-AS2	chr10	antisense	ZNF503 antisense RNA 2
ENSG00000274932.1	0	0	0	0	0	0.3	MIR7150	chr9	miRNA	microRNA 7150
ENSG00000226948.1	0.03	0	0	0	0	0	RPS4XP2	chr20	processed_pseudogene	ribosomal protein S4X pseudogene 2
ENSG00000152409.8	0.61	0.78	0.61	0.75	0.86	1.1	JMY	chr5	protein_coding	junction mediating and regulatory protein, p53 cofactor
ENSG00000162599.15	0.96	1.03	0.95	1.13	1.17	1.37	NFIA	chr1	protein_coding	nuclear factor I/A
ENSG00000171777.15	0	0	0	0	0.01	0.01	RASGRP4	chr19	protein_coding	RAS guanyl releasing protein 4
ENSG00000234445.1	0	0	0.06	0	0	0	FGF14-AS1	chr13	antisense	FGF14 antisense RNA 1
ENSG00000104812.14	4.78	5.18	5.08	6.56	6.12	6.37	GYS1	chr19	protein_coding	glycogen synthase 1 (muscle)
ENSG00000091651.8	24.53	23.4	24.14	24.71	23.23	19.47	ORC6	chr16	protein_coding	origin recognition complex, subunit 6
ENSG00000178458.5	0.07	0.07	0	0.13	0.07	0	H3F3AP6	chr4	processed_pseudogene	H3 histone, family 3A, pseudogene 6
ENSG00000108576.9	1.04	1	1.14	1.1	0.99	0.91	SLC6A4	chr17	protein_coding	solute carrier family 6 (neurotransmitter transporter), member 4
ENSG00000236807.1	0	0.08	0	0	0	0.09	AC092066.6	chr19	processed_pseudogene	--
ENSG00000130758.7	1.14	1.57	1.56	1.93	2.17	2.98	MAP3K10	chr19	protein_coding	mitogen-activated protein kinase kinase kinase 10
ENSG00000207550.1	0	0	0.43	0	0	0.81	MIR99B	chr19	miRNA	microRNA 99b
ENSG00000260466.1	0	0	0.06	0	0	0	RP4-536B24.2	chr16	antisense	--
ENSG00000124784.8	9.32	8.08	9.04	11.12	11.4	9.48	RIOK1	chr6	protein_coding	RIO kinase 1
ENSG00000087076.8	1.36	1.49	1.92	1.18	1.38	1.27	HSD17B14	chr19	protein_coding	hydroxysteroid (17-beta) dehydrogenase 14
ENSG00000221826.9	0.01	0.01	0.03	0	0.01	0.01	PSG3	chr19	protein_coding	pregnancy specific beta-1-glycoprotein 3
ENSG00000264058.1	0	0	0.01	0	0.03	0.03	RP5-1028K7.3	chr17	protein_coding	--
ENSG00000111785.18	1.59	1.9	1.88	1.98	1.85	1.39	RIC8B	chr12	protein_coding	RIC8 guanine nucleotide exchange factor B
ENSG00000277350.1	0	0	0	0	0	0.02	RP11-395E19.6	chr9	lincRNA	--
ENSG00000258499.1	0.04	0.02	0	0.04	0	0	RP11-862G15.2	chr14	lincRNA	--
ENSG00000091073.19	5.55	6.75	6	6.27	6.58	5.76	DTX2	chr7	protein_coding	deltex 2, E3 ubiquitin ligase
ENSG00000230516.1	0	0	0.04	0.03	0	0	RP11-555J4.3	chr9	lincRNA	--
ENSG00000171116.7	0	0.01	0	0	0	0.04	HSFX1	chrX	protein_coding	heat shock transcription factor family, X linked 1
ENSG00000212360.1	0	0.26	0	0	0	0.27	RNU6-1177P	chr1	snRNA	RNA, U6 small nuclear 1177, pseudogene
ENSG00000230641.1	0	0.1	0	0	0	0	USP12-AS2	chr13	antisense	USP12 antisense RNA 2 (head to head)
ENSG00000186648.14	0.05	0.01	0.03	0.05	0.06	0.06	LRRC16B	chr14	protein_coding	leucine rich repeat containing 16B
ENSG00000226017.2	0	0	0	0	0	0.02	PRICKLE2-AS3	chr3	antisense	PRICKLE2 antisense RNA 3
ENSG00000228007.1	0	0	0	0	0	0.09	AC011933.2	chr17	processed_pseudogene	--
ENSG00000172586.7	57.64	42.76	53.09	53.11	51.31	42.69	CHCHD1	chr10	protein_coding	coiled-coil-helix-coiled-coil-helix domain containing 1
ENSG00000070444.14	2.6	3.57	2.72	3.33	3.56	5.21	MNT	chr17	protein_coding	MAX network transcriptional repressor
ENSG00000275812.1	0.08	0.33	0	0.08	0.08	0.09	RP4-697K14.15	chr20	antisense	--
ENSG00000248275.1	3.63	2.76	4.02	3.66	3.6	3.34	TRIM52-AS1	chr5	processed_transcript	TRIM52 antisense RNA 1 (head to head)
ENSG00000057657.14	0	0.02	0	0.01	0.01	0.01	PRDM1	chr6	protein_coding	PR domain containing 1, with ZNF domain
ENSG00000270367.1	0.24	0.73	0.48	0.64	0.45	0.66	RP11-331G2.6	chr3	processed_pseudogene	--
ENSG00000240674.1	0	0	0.06	0	0	0	RP11-366M4.1	chr4	processed_pseudogene	--
ENSG00000246582.2	0.95	1.37	1.23	1.25	1.79	1.18	RP11-1149O23.3	chr8	processed_transcript	--
ENSG00000267261.5	71.36	65.86	81.75	75.5	75.63	59.85	CTD-2132N18.3	chr17	protein_coding	--
ENSG00000237689.1	0	0.16	0.24	0.16	0.16	0.23	AC007064.24	chr22	lincRNA	--
ENSG00000075461.5	0.51	0.46	0.64	0.5	0.42	0.5	CACNG4	chr17	protein_coding	calcium channel, voltage-dependent, gamma subunit 4
ENSG00000143850.12	4.5	5.71	4.8	5.32	5.61	10.34	PLEKHA6	chr1	protein_coding	pleckstrin homology domain containing, family A member 6
ENSG00000204055.4	0.01	0.04	0.09	0.07	0.09	0.06	RP11-247A12.2	chr9	antisense	--
ENSG00000150459.12	58.09	49.77	56.67	64.32	61.61	48.05	SAP18	chr13	protein_coding	Sin3A-associated protein, 18kDa
ENSG00000231086.1	0.03	0.03	0	0	0	0.04	TSSK1A	chr22	unitary_pseudogene	testis-specific serine kinase 1A pseudogene
ENSG00000280028.1	0.05	0.09	0	0.05	0	0.44	RP11-118E18.1	chr17	TEC	--
ENSG00000276868.1	0	0	0.23	0	0	0	RP11-318K12.3	chr9	processed_pseudogene	--
ENSG00000268324.2	0	0.01	0	0.04	0	0.02	LRRC2-AS1	chr3	antisense	LRRC2 antisense RNA 1
ENSG00000258791.7	0.01	0.02	0	0.02	0	0.01	LINC00520	chr14	lincRNA	long intergenic non-protein coding RNA 520
ENSG00000259024.6	0.2	0.16	0.11	0.14	0.23	0.27	TVP23C-CDRT4	chr17	protein_coding	TVP23C-CDRT4 readthrough
ENSG00000054179.11	9.13	9.88	8.75	11.23	11.58	10.82	ENTPD2	chr9	protein_coding	ectonucleoside triphosphate diphosphohydrolase 2
ENSG00000117152.13	0	0.03	0.01	0	0	0	RGS4	chr1	protein_coding	regulator of G-protein signaling 4
ENSG00000212290.1	0.7	0.47	0.78	0.71	0.71	0.49	RNA5SP424	chr16	rRNA	RNA, 5S ribosomal pseudogene 424
ENSG00000258424.1	0.27	0	0.3	0.09	0.09	0.19	RP11-471B22.2	chr14	antisense	--
ENSG00000159224.4	1.76	2.58	2.5	1.87	1.51	2.19	GIP	chr17	protein_coding	gastric inhibitory polypeptide
ENSG00000135316.17	15.04	14.02	14.22	15.13	15.28	13.33	SYNCRIP	chr6	protein_coding	synaptotagmin binding, cytoplasmic RNA interacting protein
ENSG00000115239.21	5.58	5.36	5.74	5.8	6.11	4.61	GPR75-ASB3	chr2	protein_coding	GPR75-ASB3 readthrough
ENSG00000180458.2	0.01	0	0.01	0	0	0.03	CTD-3064H18.4	chr19	antisense	--
ENSG00000272523.1	0.98	0.06	1.03	0.75	0.81	0.72	LINC01023	chr5	lincRNA	long intergenic non-protein coding RNA 1023
ENSG00000241119.1	0.04	0.06	0.04	0.02	0.04	0.01	UGT1A9	chr2	protein_coding	UDP glucuronosyltransferase 1 family, polypeptide A9
ENSG00000135776.4	5.6	5.48	4.93	5.77	5.19	4.36	ABCB10	chr1	protein_coding	ATP-binding cassette, sub-family B (MDR/TAP), member 10
ENSG00000119121.21	0	0.01	0.02	0	0	0.04	TRPM6	chr9	protein_coding	transient receptor potential cation channel, subfamily M, member 6
ENSG00000167740.9	5.28	5.28	5.73	6.58	7.18	5.82	CYB5D2	chr17	protein_coding	cytochrome b5 domain containing 2
ENSG00000236936.1	0.37	0.33	0.66	0.34	0.37	0.12	RP3-329E20.2	chr1	antisense	--
ENSG00000185551.12	1.66	2.28	1.83	2.07	1.84	2.07	NR2F2	chr15	protein_coding	nuclear receptor subfamily 2, group F, member 2
ENSG00000165775.17	6.31	5.31	6.06	5.99	5.72	4.41	FUNDC2	chrX	protein_coding	FUN14 domain containing 2
ENSG00000184814.5	0	0	0.02	0	0	0	PRR23B	chr3	protein_coding	proline rich 23B
ENSG00000231390.1	0	0	0	0	0	0.07	SNX18P8	chr9	unprocessed_pseudogene	sorting nexin 18 pseudogene 8
ENSG00000259424.1	0.32	0.24	0.09	0	0.41	0	RP11-35O15.1	chr15	antisense	--
ENSG00000248554.1	0.23	0.28	0.63	0.38	0.33	0.45	RP11-159F24.6	chr5	antisense	--
ENSG00000279571.1	0.11	0.11	0.28	0.04	0.15	0	RP11-56D16.8	chr9	lincRNA	--
ENSG00000267457.1	0	0.05	0	0	0.15	0.1	RP5-837J1.4	chr17	lincRNA	--
ENSG00000186635.14	9	10.29	9.38	10.56	10.87	21	ARAP1	chr11	protein_coding	ArfGAP with RhoGAP domain, ankyrin repeat and PH domain 1
ENSG00000260643.1	22.17	15.31	19.53	18.04	18.37	14.5	RP11-303E16.8	chr16	processed_transcript	--
ENSG00000179841.8	0.32	0.3	0.27	0.32	0.25	0.2	AKAP5	chr14	protein_coding	A kinase (PRKA) anchor protein 5
ENSG00000260641.1	0.02	0	0	0	0.01	0.01	RP11-1299A16.3	chr4	antisense	--
ENSG00000233828.3	0	0	0.01	0	0	0.03	CTC-242N15.1	chr5	lincRNA	--
ENSG00000198744.5	1.32	1.22	0.6	1.4	1.14	0.73	RP5-857K21.11	chr1	unprocessed_pseudogene	--
ENSG00000198924.7	4.17	3.94	4.11	4.28	4.81	2.63	DCLRE1A	chr10	protein_coding	DNA cross-link repair 1A
ENSG00000157326.18	13.05	11.55	11.89	11.29	14.08	11.11	DHRS4	chr14	protein_coding	dehydrogenase/reductase (SDR family) member 4
ENSG00000276691.1	0.05	0.1	0	0.1	0.25	0	RP5-1057I20.5	chr12	antisense	--
ENSG00000255319.5	0	0	0	0	0	0.02	ENPP7P8	chr11	transcribed_unprocessed_pseudogene	ectonucleotide pyrophosphatase/phosphodiesterase 7 pseudogene 8
ENSG00000143553.10	19.16	15.47	18.92	20.11	20.11	15.91	SNAPIN	chr1	protein_coding	SNAP-associated protein
ENSG00000104863.11	2.91	3.62	3.59	2.87	2.94	3.2	LIN7B	chr19	protein_coding	lin-7 homolog B (C. elegans)
ENSG00000187951.10	0.66	1.19	0.75	0.98	0.96	4.12	ARHGAP11B	chr15	protein_coding	Rho GTPase activating protein 11B
ENSG00000275839.1	0	0	0	0	0.06	0	CTC-421K24.1	chr17	processed_pseudogene	--
ENSG00000227262.3	0.03	0.03	0.03	0	0.05	0.14	HCG4B	chr6	unprocessed_pseudogene	HLA complex group 4B (non-protein coding)
ENSG00000261872.1	0	0	0	0	0	0.04	RP5-867C24.5	chr17	antisense	--
ENSG00000154415.7	0.01	0	0	0	0	0	PPP1R3A	chr7	protein_coding	protein phosphatase 1, regulatory subunit 3A
ENSG00000126934.13	100.49	105.72	114.33	94.29	88.46	73.46	MAP2K2	chr19	protein_coding	mitogen-activated protein kinase kinase 2
ENSG00000279901.1	0.08	0.27	0.09	0.08	0.13	0.38	CTD-2270P14.2	chr16	TEC	--
ENSG00000177352.9	9.71	7.97	8.73	11.2	10.5	8.83	CCDC71	chr3	protein_coding	coiled-coil domain containing 71
ENSG00000236991.6	0	0.02	0	0	0	0	EDRF1-AS1	chr10	antisense	EDRF1 antisense RNA 1
ENSG00000240618.1	0.45	0.54	0.3	0.74	0.92	5.79	RP11-206L10.5	chr1	lincRNA	--
ENSG00000279527.1	0	0	0	0	0	0.11	RP11-83B20.2	chr12	TEC	--
ENSG00000166024.13	4.27	4.96	4.69	5.36	5.43	4.1	R3HCC1L	chr10	protein_coding	R3H domain and coiled-coil containing 1-like
ENSG00000226599.1	0	0	0	0	0.04	0	RP11-136K14.3	chr6	lincRNA	--
ENSG00000243297.2	0	0	0	0.07	0	0	RPL31P61	chr19	processed_pseudogene	ribosomal protein L31 pseudogene 61
ENSG00000168890.13	11.66	12.84	13.08	14.69	15.19	12.51	TMEM150A	chr2	protein_coding	transmembrane protein 150A
ENSG00000261079.1	0.03	0.02	0	0.05	0.06	0.06	RP11-252A24.3	chr16	lincRNA	--
ENSG00000262791.1	0.06	0	0	0	0.06	0.19	RP11-961A15.1	chr17	antisense	--
ENSG00000147872.9	104.19	91.22	98.04	82.94	81.99	62.3	PLIN2	chr9	protein_coding	perilipin 2
ENSG00000166396.12	0	0	0.01	0	0	0	SERPINB7	chr18	protein_coding	serpin peptidase inhibitor, clade B (ovalbumin), member 7
ENSG00000233821.1	0	0.01	0	0.01	0	0.01	ENOX1-AS1	chr13	lincRNA	ENOX1 antisense RNA 1
ENSG00000104756.15	7.86	7.81	7.68	6.9	7.01	5.24	KCTD9	chr8	protein_coding	potassium channel tetramerization domain containing 9
ENSG00000223460.1	0.03	0	0	0	0	0	GAPDHP69	chr13	processed_pseudogene	glyceraldehyde 3 phosphate dehydrogenase pseudogene 69
ENSG00000282393.1	2.2	2.6	2.15	2.82	2.93	2.71	CTD-3113P16.11	chr19	lincRNA	--
ENSG00000103855.17	10.05	11.59	11.46	12.44	13.44	11.98	CD276	chr15	protein_coding	CD276 molecule
ENSG00000132879.13	8.79	9.38	10.58	8.2	8.93	9.01	FBXO44	chr1	protein_coding	F-box protein 44
ENSG00000145217.13	3.01	3.24	3.29	2.25	2.45	3.95	SLC26A1	chr4	protein_coding	solute carrier family 26 (anion exchanger), member 1
ENSG00000225195.2	0.1	0.57	0.11	0	0.1	0.3	RP11-338E21.2	chr12	sense_intronic	--
ENSG00000118298.10	0.23	0.2	0.24	0.46	0.34	0.18	CA14	chr1	protein_coding	carbonic anhydrase XIV
ENSG00000130635.15	0.02	0.01	0.02	0.01	0.04	0.1	COL5A1	chr9	protein_coding	collagen, type V, alpha 1
ENSG00000214097.4	0	0	0.02	0	0	0	SMCO1	chr3	protein_coding	single-pass membrane protein with coiled-coil domains 1
ENSG00000220891.1	0	0.03	0.01	0.01	0.03	0.08	LL22NC03-63E9.3	chr22	antisense	--
ENSG00000224046.1	1.57	1.15	1.4	0.96	1.27	1.18	AC005076.5	chr7	antisense	--
ENSG00000029153.14	2.53	2.43	2.72	2.86	3.02	3.41	ARNTL2	chr12	protein_coding	aryl hydrocarbon receptor nuclear translocator-like 2
ENSG00000255537.1	0	0.04	0.01	0.02	0.01	0.03	AP000708.1	chr11	antisense	--
ENSG00000198618.5	1.29	1.4	1.08	0.83	0.93	1.03	PPIAP22	chr21	processed_pseudogene	peptidylprolyl isomerase A (cyclophilin A) pseudogene 22
ENSG00000177082.12	5.38	5.24	5.03	5.36	5.53	5.58	WDR73	chr15	protein_coding	WD repeat domain 73
ENSG00000227234.1	1.2	0.91	0.7	1.17	1.44	0.85	SPANXB1	chrX	protein_coding	SPANX family, member B1
ENSG00000226806.1	0	0.01	0	0	0	0.03	AC011893.3	chr2	antisense	--
ENSG00000279281.1	0.39	1.63	0.46	0.54	0.42	0.52	RP11-226M10.3	chr17	TEC	--
ENSG00000120896.13	13.59	16.85	13.94	11.21	11.2	13.17	SORBS3	chr8	protein_coding	sorbin and SH3 domain containing 3
ENSG00000176584.15	0.01	0	0	0.01	0.01	0.01	DMBT1P1	chr10	transcribed_processed_pseudogene	deleted in malignant brain tumors 1 pseudogene 1
ENSG00000260711.2	0	0	0.01	0	0	0	RP11-747H7.3	chr14	sense_intronic	--
ENSG00000228322.1	0	0	0	0.03	0	0	RP11-358M14.2	chr9	antisense	--
ENSG00000279611.1	0	0.03	0	0	0	0	CTD-2619J13.5	chr19	TEC	--
ENSG00000137672.12	0	0	0	0.01	0	0	TRPC6	chr11	protein_coding	transient receptor potential cation channel, subfamily C, member 6
ENSG00000250144.1	0	0.02	0	0	0	0	RP11-553P9.1	chr4	processed_pseudogene	--
ENSG00000198203.9	0.85	0.75	0.72	0.61	0.73	0.55	SULT1C2	chr2	protein_coding	sulfotransferase family, cytosolic, 1C, member 2
ENSG00000232196.3	0.02	0.06	0.02	0.03	0.05	0.05	MTRNR2L4	chr16	protein_coding	MT-RNR2-like 4
ENSG00000262587.2	0.21	0.4	0.32	0.49	0.41	0.38	RP11-266L9.4	chr16	transcribed_unprocessed_pseudogene	--
ENSG00000238039.1	0.12	0.12	0.23	0.17	0.08	0.43	AF011889.2	chrX	lincRNA	--
ENSG00000124535.15	20.69	20.36	21.36	21.52	21.41	18.13	WRNIP1	chr6	protein_coding	Werner helicase interacting protein 1
ENSG00000173349.5	4.5	3.84	4.25	4.96	5.23	3.96	SFT2D3	chr2	protein_coding	SFT2 domain containing 3
ENSG00000109107.13	22.03	19.75	22.85	13.59	14.7	10.85	ALDOC	chr17	protein_coding	aldolase C, fructose-bisphosphate
ENSG00000230998.1	0	0.06	0	0	0	0	RP11-14C22.3	chr10	lincRNA	--
ENSG00000109771.15	0.06	0.07	0.08	0.06	0.09	0.05	LRP2BP	chr4	protein_coding	LRP2 binding protein
ENSG00000256288.1	0	0	0	0	0	0.09	RP11-277P12.10	chr12	lincRNA	--
ENSG00000270103.3	0.41	0	0.23	0.42	0.83	0.43	RNU11	chr1	lincRNA	RNA, U11 small nuclear
ENSG00000164825.3	472.99	344.47	484.53	257.91	255.69	220.37	DEFB1	chr8	protein_coding	defensin, beta 1
ENSG00000090372.14	20.21	20.91	21.96	21.12	22.74	23.26	STRN4	chr19	protein_coding	striatin, calmodulin binding protein 4
ENSG00000198440.9	0.15	0.13	0.17	0.32	0.41	0.3	ZNF583	chr19	protein_coding	zinc finger protein 583
ENSG00000109323.8	5.45	5.46	5.32	4.45	4.36	3.63	MANBA	chr4	protein_coding	mannosidase, beta A, lysosomal
ENSG00000133256.12	0.84	0.75	0.86	0.95	1.01	1.04	PDE6B	chr4	protein_coding	phosphodiesterase 6B, cGMP-specific, rod, beta
ENSG00000134249.6	0	0	0	0.01	0	0	ADAM30	chr1	protein_coding	ADAM metallopeptidase domain 30
ENSG00000230666.5	0.06	0.08	0.03	0.1	0.03	0.04	CEACAM22P	chr19	transcribed_unprocessed_pseudogene	carcinoembryonic antigen-related cell adhesion molecule 22, pseudogene
ENSG00000257572.1	0	0.02	0	0	0	0	RP11-478B9.2	chr12	processed_pseudogene	--
ENSG00000198547.8	0	0.03	0.04	0.02	0.03	0.08	C20orf203	chr20	lincRNA	chromosome 20 open reading frame 203
ENSG00000208037.1	0	0	0	0	0	0.35	MIR320A	chr8	miRNA	microRNA 320a
ENSG00000265367.1	0	0	0	0	0.54	0	AL160269.1	chr9	miRNA	--
ENSG00000089335.20	0	0	0	0.02	0	0	ZNF302	chr19	protein_coding	zinc finger protein 302
ENSG00000181638.17	0.59	0.84	0.77	0.98	0.9	2.16	ZFP41	chr8	protein_coding	ZFP41 zinc finger protein
ENSG00000134108.12	24.48	23.98	23.56	22.23	23.98	17.54	ARL8B	chr3	protein_coding	ADP-ribosylation factor-like 8B
ENSG00000113312.10	41	32.31	37.96	43.92	41.56	32.24	TTC1	chr5	protein_coding	tetratricopeptide repeat domain 1
ENSG00000273240.1	0.36	0.76	0.45	0.64	0.63	0.24	RP11-455J20.3	chr2	antisense	--
ENSG00000179397.17	0.02	0.02	0.03	0.04	0.02	0.07	C1orf101	chr1	protein_coding	chromosome 1 open reading frame 101
ENSG00000279453.1	0.81	0.6	0.64	0.74	0.85	0.7	RP3-425C14.4	chr6	TEC	--
ENSG00000237065.2	0	0.03	0.03	0	0	0.16	NANOGP4	chr7	transcribed_processed_pseudogene	Nanog homeobox pseudogene 4
ENSG00000266473.1	0.86	0.74	0.69	1.11	0.98	1.07	RP11-401F2.3	chr17	antisense	--
ENSG00000140575.12	8.51	7.83	8.41	10.55	11.04	10.28	IQGAP1	chr15	protein_coding	IQ motif containing GTPase activating protein 1
ENSG00000158486.13	0.02	0.01	0.01	0.03	0.03	0.01	DNAH3	chr16	protein_coding	dynein, axonemal, heavy chain 3
ENSG00000110436.11	0.69	0.78	0.74	0.48	0.36	0.32	SLC1A2	chr11	protein_coding	solute carrier family 1 (glial high affinity glutamate transporter), member 2
ENSG00000100647.7	3.16	3.49	3.46	3.31	3.47	3.46	SUSD6	chr14	protein_coding	sushi domain containing 6
ENSG00000275367.1	0.05	0.03	0.06	0.04	0.02	0.02	RP11-266K4.14	chr12	lincRNA	--
ENSG00000242747.1	0.34	0.17	0.19	0.17	0.11	1.61	RP11-30K9.1	chr15	processed_pseudogene	--
ENSG00000230773.6	0.01	0	0.02	0.02	0.09	0	AC079807.4	chr2	lincRNA	--
ENSG00000101216.10	3.9	4.26	4.29	4.19	4.51	5.31	GMEB2	chr20	protein_coding	glucocorticoid modulatory element binding protein 2
ENSG00000229721.3	0.09	0	0	0.04	0.04	0.18	RP11-252I14.1	chr5	processed_pseudogene	--
ENSG00000252002.1	0.48	1.45	0	0	0.24	0.26	RNA5SP154	chr4	rRNA	RNA, 5S ribosomal pseudogene 154
ENSG00000004468.12	0.01	0.01	0.01	0	0	0.05	CD38	chr4	protein_coding	CD38 molecule
ENSG00000170632.13	6.67	6.62	7.06	6.85	7.02	5.78	ARMC10	chr7	protein_coding	armadillo repeat containing 10
ENSG00000143374.14	9.34	9.53	8.17	12.45	11.46	11.5	TARS2	chr1	protein_coding	threonyl-tRNA synthetase 2, mitochondrial (putative)
ENSG00000245156.1	0.07	0.09	0.02	0.08	0.01	0.03	RP11-867G23.3	chr11	lincRNA	--
ENSG00000073331.17	0.11	0.14	0.09	0.11	0.22	0.13	ALPK1	chr4	protein_coding	alpha-kinase 1
ENSG00000225643.1	0.33	0.06	0.25	0	0.17	0.12	RP11-70P17.1	chr1	lincRNA	--
ENSG00000183484.11	0	0.02	0.02	0.01	0.03	0.1	GPR132	chr14	protein_coding	G protein-coupled receptor 132
ENSG00000274184.1	0.04	0.05	0.04	0	0	0.01	RP11-158H5.8	chr18	lincRNA	--
ENSG00000257243.1	0.1	0.25	0	0.05	0	0.53	RP11-133N21.7	chr12	processed_pseudogene	--
ENSG00000135049.15	2.98	2.8	2.83	3.52	3.37	2.71	AGTPBP1	chr9	protein_coding	ATP/GTP binding protein 1
ENSG00000158571.10	0.77	1.16	1.38	1.05	1.28	1.15	PFKFB1	chrX	protein_coding	6-phosphofructo-2-kinase/fructose-2,6-biphosphatase 1
ENSG00000213371.4	0	0	0.03	0	0	0	NAP1L1P3	chr3	processed_pseudogene	nucleosome assembly protein 1-like 1 pseudogene 3
ENSG00000198555.7	0.06	0.12	0.06	0.08	0.09	0.11	RP11-598D12.4	chr16	unprocessed_pseudogene	--
ENSG00000229931.1	0.71	0.76	0.97	0.89	0.66	0.99	RP1-151F17.1	chr6	antisense	--
ENSG00000274340.1	0	0	0.06	0.04	0.02	0.06	RP11-435J9.2	chr15	lincRNA	--
ENSG00000149435.12	0	0	0.05	0	0	0	GGTLC1	chr20	protein_coding	gamma-glutamyltransferase light chain 1
ENSG00000184584.12	1.33	1.59	1.42	1.62	2.14	1.64	TMEM173	chr5	protein_coding	transmembrane protein 173
ENSG00000242085.1	0.38	0.91	0.42	1.47	1	1.69	RPS20P33	chr14	processed_pseudogene	ribosomal protein S20 pseudogene 33
ENSG00000239539.1	0	0	0	0	0	0.09	HMGN1P20	chr10	processed_pseudogene	high mobility group nucleosome binding domain 1 pseudogene 20
ENSG00000263976.1	0.22	0	0	0	0	0	YWHAEP3	chr17	processed_pseudogene	tyrosine 3-monooxygenase/tryptophan 5-monooxygenase activation protein, epsilon pseudogene 3
ENSG00000164822.4	0	0.06	0.06	0	0	0	DEFA6	chr8	protein_coding	defensin, alpha 6, Paneth cell-specific
ENSG00000153879.8	9.15	8.67	8.88	9.75	9.87	7.7	CEBPG	chr19	protein_coding	CCAAT/enhancer binding protein (C/EBP), gamma
ENSG00000237021.2	0.13	0.1	0.06	0.08	0.12	0.07	RP3-486I3.7	chr6	lincRNA	--
ENSG00000260936.1	0.18	0.26	0.32	0.22	0.4	0.23	FTO-IT1	chr16	sense_intronic	FTO intronic transcript 1
ENSG00000113460.12	22.41	20.37	20.94	23.38	23.48	18.22	BRIX1	chr5	protein_coding	BRX1, biogenesis of ribosomes
ENSG00000090889.11	8.51	8.33	8.53	9.92	9.74	9.06	KIF4A	chrX	protein_coding	kinesin family member 4A
ENSG00000271398.1	0	0	0	0	0.06	0	RP5-1092A3.5	chr1	lincRNA	--
ENSG00000222790.1	0	0	0	0.22	0.22	0	RNU4-14P	chr5	snRNA	RNA, U4 small nuclear 14, pseudogene
ENSG00000128617.2	0	0	0	0	0.02	0	OPN1SW	chr7	protein_coding	opsin 1 (cone pigments), short-wave-sensitive
ENSG00000163870.14	9.3	9.11	11.24	8.71	9.23	8.4	TPRA1	chr3	protein_coding	transmembrane protein, adipocyte asscociated 1
ENSG00000181126.13	0.02	0.04	0.06	0	0.05	0.06	HLA-V	chr6	transcribed_unprocessed_pseudogene	major histocompatibility complex, class I, V (pseudogene)
ENSG00000258768.2	0.61	0.64	0.62	0.38	0.4	0.4	CTD-2292M16.8	chr14	lincRNA	--
ENSG00000233589.1	0	0	0	0.06	0.03	0	RP4-694A7.2	chr1	antisense	--
ENSG00000184730.10	0.11	0.15	0.11	0.14	0.14	0.19	APOBR	chr16	protein_coding	apolipoprotein B receptor
ENSG00000241316.6	0.15	0.13	0.25	0.18	0.13	0.37	SUCLG2-AS1	chr3	lincRNA	SUCLG2 antisense RNA 1 (head to head)
ENSG00000242318.1	0	0	0	0	0	0.06	RP11-810D13.1	chr4	processed_pseudogene	--
ENSG00000269946.1	0.23	0	0.25	0.23	0	0.12	RP11-2B6.3	chr9	lincRNA	--
ENSG00000121073.13	32.55	28.92	34.87	30.22	29.54	23.99	SLC35B1	chr17	protein_coding	solute carrier family 35, member B1
ENSG00000164691.16	0	0.01	0	0	0	0	TAGAP	chr6	protein_coding	T-cell activation RhoGTPase activating protein
ENSG00000140876.11	4.2	3.79	3.63	4.26	4.64	3.26	NUDT7	chr16	protein_coding	nudix (nucleoside diphosphate linked moiety X)-type motif 7
ENSG00000207805.2	0	0	0	0	0.24	0.76	MIR483	chr11	miRNA	microRNA 483
ENSG00000167615.16	7.34	10.63	9.51	8.81	10.09	20.44	LENG8	chr19	protein_coding	leukocyte receptor cluster (LRC) member 8
ENSG00000204542.2	0.33	0.31	0.45	0.12	0.19	0.12	C6orf15	chr6	protein_coding	chromosome 6 open reading frame 15
ENSG00000008056.12	1.6	1.9	1.47	1.79	1.78	1.28	SYN1	chrX	protein_coding	synapsin I
ENSG00000238083.7	0.34	0.34	0.34	0.26	0.29	0.44	LRRC37A2	chr17	protein_coding	leucine rich repeat containing 37, member A2
ENSG00000166436.15	0.78	1.05	0.84	0.97	0.95	2	TRIM66	chr11	protein_coding	tripartite motif containing 66
ENSG00000101400.5	10.84	10.2	11.6	11.63	11.62	9.88	SNTA1	chr20	protein_coding	syntrophin, alpha 1
ENSG00000187123.14	0.01	0	0.01	0.01	0.01	0.03	LYPD6	chr2	protein_coding	LY6/PLAUR domain containing 6
ENSG00000182606.14	4.58	5.41	5.26	5.78	5.89	7.03	TRAK1	chr3	protein_coding	trafficking protein, kinesin binding 1
ENSG00000165029.15	3.24	3.8	3.36	2.67	2.74	4.82	ABCA1	chr9	protein_coding	ATP-binding cassette, sub-family A (ABC1), member 1
ENSG00000267123.5	1.44	1.26	1.13	1.43	1.3	1.62	CTD-2357A8.3	chr17	lincRNA	--
ENSG00000185215.8	0.42	0.41	0.43	0.35	0.41	0.74	TNFAIP2	chr14	protein_coding	tumor necrosis factor, alpha-induced protein 2
ENSG00000168152.12	0.82	1.01	0.92	1.19	0.85	0.66	THAP9	chr4	protein_coding	THAP domain containing 9
ENSG00000262362.1	0.04	0.18	0.1	0.14	0.18	0.33	LA16c-380H5.2	chr16	sense_overlapping	--
ENSG00000219445.2	0	0.01	0	0	0	0	RP11-3B12.3	chr7	lincRNA	--
ENSG00000277948.1	0	0	0	0.29	0	0.76	uc_338	chr2	misc_RNA	--
ENSG00000102103.15	47.91	44.56	51.71	52.47	49.36	39.42	PQBP1	chrX	protein_coding	polyglutamine binding protein 1
ENSG00000161048.11	0.78	0.95	0.8	1.22	1.06	0.83	NAPEPLD	chr7	protein_coding	N-acyl phosphatidylethanolamine phospholipase D
ENSG00000257921.5	10.73	9.11	10.08	13.11	10.7	8.51	RP11-571M6.15	chr12	protein_coding	--
ENSG00000226455.1	0	0	0	0	0.03	0	RP3-512E2.2	chr6	antisense	--
ENSG00000128805.14	0.03	0.01	0.03	0.02	0	0.02	ARHGAP22	chr10	protein_coding	Rho GTPase activating protein 22
ENSG00000260869.1	0.78	0.99	0.87	1.6	1.01	2.26	AC002310.13	chr16	protein_coding	--
ENSG00000005249.12	0.02	0.04	0.03	0.02	0.01	0.04	PRKAR2B	chr7	protein_coding	protein kinase, cAMP-dependent, regulatory, type II, beta
ENSG00000145014.17	1.83	2.02	1.91	2.76	3.04	3.71	TMEM44	chr3	protein_coding	transmembrane protein 44
ENSG00000029993.14	18.71	16.31	16.99	21.25	20.73	16.29	HMGB3	chrX	protein_coding	high mobility group box 3
ENSG00000125378.15	91.54	88.11	93.74	91.24	92.62	78.29	BMP4	chr14	protein_coding	bone morphogenetic protein 4
ENSG00000111087.9	0	0	0.02	0.01	0.01	0.02	GLI1	chr12	protein_coding	GLI family zinc finger 1
ENSG00000229503.1	0	0	0.06	0	0	0	AC092155.1	chr2	processed_pseudogene	--
ENSG00000257702.3	16.97	18.93	16.83	20.27	19.85	18.45	LBX2-AS1	chr2	antisense	LBX2 antisense RNA 1
ENSG00000250722.5	142.84	125.8	135.31	115.15	107.77	74.63	SEPP1	chr5	protein_coding	selenoprotein P, plasma, 1
ENSG00000253368.3	87.9	78.45	90.17	110.27	113.06	94.05	TRNP1	chr1	protein_coding	TMF1-regulated nuclear protein 1
ENSG00000101003.9	23.79	23.14	22.51	25.02	25.9	28.78	GINS1	chr20	protein_coding	GINS complex subunit 1 (Psf1 homolog)
ENSG00000023171.14	0	0	0.01	0	0	0.01	GRAMD1B	chr11	protein_coding	GRAM domain containing 1B
ENSG00000229127.1	0.1	0.16	0.14	0.31	0.25	0.36	AC007038.7	chr2	antisense	--
ENSG00000257818.1	0.05	0.05	0	0.05	0.07	0.08	C1GALT1P1	chr12	processed_pseudogene	core 1 synthase, glycoprotein-N-acetylgalactosamine 3-beta-galactosyltransferase 1 pseudogene 1
ENSG00000117013.14	0.03	0.03	0.04	0.01	0.01	0.01	KCNQ4	chr1	protein_coding	potassium channel, voltage gated KQT-like subfamily Q, member 4
ENSG00000266457.1	0	0.27	0	0	0	0	AC026318.1	chr3	miRNA	--
ENSG00000260029.2	0	0	0.08	0	0	0.12	RP11-401P9.1	chr16	antisense	--
ENSG00000237629.1	0	0	0.21	0	0.09	0	UQCRHP2	chr2	processed_pseudogene	ubiquinol-cytochrome c reductase hinge protein pseudogene 2
ENSG00000183837.9	0	0	0	0	0	0.01	PNMA3	chrX	protein_coding	paraneoplastic Ma antigen 3
ENSG00000173334.3	13.04	13.5	13.6	14.31	15.38	11.96	TRIB1	chr8	protein_coding	tribbles pseudokinase 1
ENSG00000204420.8	0.01	0.02	0	0	0.01	0.03	C6orf25	chr6	protein_coding	chromosome 6 open reading frame 25
ENSG00000198736.11	44.37	39.2	47.69	35.66	32.93	29.42	MSRB1	chr16	protein_coding	methionine sulfoxide reductase B1
ENSG00000184188.6	0	0.02	0	0	0	0	CTC-512J14.7	chr5	processed_pseudogene	--
ENSG00000124915.10	0.03	0.01	0.02	0.01	0.01	0.05	DKFZP434K028	chr11	lincRNA	--
ENSG00000236280.1	0	0	0	0	0	0.16	AC114737.3	chr7	processed_pseudogene	--
ENSG00000266200.6	0.13	0.09	0.08	0.07	0.07	0.04	PNLIPRP2	chr10	polymorphic_pseudogene	pancreatic lipase-related protein 2
ENSG00000260007.1	1.19	1.01	1.37	1.76	1.21	1.03	RP11-315D16.2	chr15	protein_coding	--
ENSG00000265249.1	0.54	0.27	0	0.27	0.27	0	AC025280.1	chr16	miRNA	--
ENSG00000185495.10	1.69	2.18	1.99	1.38	1.71	1.55	RP11-504P24.3	chr1	transcribed_unprocessed_pseudogene	--
ENSG00000230074.1	0.04	0	0	0.08	0.2	0.17	RP11-195F19.9	chr9	antisense	--
ENSG00000204628.11	803.98	702.79	800.16	762.88	750.08	564.18	GNB2L1	chr5	protein_coding	guanine nucleotide binding protein (G protein), beta polypeptide 2-like 1
ENSG00000256651.1	0	0	0	0	0	0.09	RP11-144O23.8	chr12	processed_pseudogene	--
ENSG00000127054.18	22.52	23.88	25.32	23.67	24.78	24.7	CPSF3L	chr1	protein_coding	cleavage and polyadenylation specific factor 3-like
ENSG00000267289.1	0	0	0.04	0	0.04	0	CTD-2623N2.11	chr19	lincRNA	--
ENSG00000065457.10	0.77	0.86	0.59	0.66	0.83	2.36	ADAT1	chr16	protein_coding	adenosine deaminase, tRNA-specific 1
ENSG00000176746.6	0.07	0.03	0.05	0.01	0.06	0	MAGEB6	chrX	protein_coding	melanoma antigen family B6
ENSG00000119231.10	3.93	4.05	3.93	3.9	3.97	4.22	SENP5	chr3	protein_coding	SUMO1/sentrin specific peptidase 5
ENSG00000188488.13	104.33	98.27	111.76	101.3	97.41	76.51	SERPINA5	chr14	protein_coding	serpin peptidase inhibitor, clade A (alpha-1 antiproteinase, antitrypsin), member 5
ENSG00000204564.11	10.11	10.74	11.21	10.4	11.18	8.73	C6orf136	chr6	protein_coding	chromosome 6 open reading frame 136
ENSG00000174547.13	54.38	46.45	51.99	47.2	43.71	34.63	MRPL11	chr11	protein_coding	mitochondrial ribosomal protein L11
ENSG00000273409.1	0	0	0	0.05	0	0	RP11-480C22.1	chr11	lincRNA	--
ENSG00000242889.3	0	0	0	0	0	0.1	RN7SL449P	chr17	misc_RNA	RNA, 7SL, cytoplasmic 449, pseudogene
ENSG00000267629.3	0.28	0.43	0.35	0.31	0.33	0.43	AC138430.4	chr19	processed_transcript	--
ENSG00000167914.10	0.16	0.24	0.22	0.04	0.03	0.04	GSDMA	chr17	protein_coding	gasdermin A
ENSG00000231652.2	0.08	0.01	0.05	0.03	0.1	0.04	RP11-553A21.3	chr6	antisense	--
ENSG00000236334.2	0.03	0.02	0.01	0.04	0.01	0.01	PPIAL4G	chr1	protein_coding	peptidylprolyl isomerase A (cyclophilin A)-like 4G
ENSG00000231795.1	0.26	0.13	0.14	0	0	0.41	ITCH-IT1	chr20	sense_intronic	ITCH intronic transcript 1
ENSG00000166558.10	0.18	0.1	0.16	0	0.02	0.07	SLC38A8	chr16	protein_coding	solute carrier family 38, member 8
ENSG00000090581.9	22.21	21.51	23.61	21.98	23.21	20.07	GNPTG	chr16	protein_coding	N-acetylglucosamine-1-phosphate transferase, gamma subunit
ENSG00000234031.1	0	0	0	0	0	0.04	RPS3AP44	chr13	processed_pseudogene	ribosomal protein S3a pseudogene 44
ENSG00000279059.1	3.41	3.33	3.73	3.8	3.17	3.84	RP11-257O5.2	chr17	TEC	--
ENSG00000100865.14	23.19	18.13	20.97	21.87	21.69	18.15	CINP	chr14	protein_coding	cyclin-dependent kinase 2 interacting protein
ENSG00000057593.13	1.66	2.1	1.64	1.91	1.74	1.71	F7	chr13	protein_coding	coagulation factor VII (serum prothrombin conversion accelerator)
ENSG00000213079.9	6.75	7.42	6.89	7.34	7.75	7.93	SCAF8	chr6	protein_coding	SR-related CTD-associated factor 8
ENSG00000159322.17	12.24	11.99	12.36	13.53	13.48	10.6	ADPGK	chr15	protein_coding	ADP-dependent glucokinase
ENSG00000149289.10	0.2	0.23	0.31	0.34	0.35	0.34	ZC3H12C	chr11	protein_coding	zinc finger CCCH-type containing 12C
ENSG00000184845.3	0	0.01	0	0	0	0	DRD1	chr5	protein_coding	dopamine receptor D1
ENSG00000186301.8	34.98	43.85	41.79	28.54	33.93	52.25	MST1P2	chr1	unprocessed_pseudogene	macrophage stimulating 1 (hepatocyte growth factor-like) pseudogene 2
ENSG00000210164.1	10.24	12.6	10.11	11.28	11.96	9.62	MT-TG	chrM	Mt_tRNA	mitochondrially encoded tRNA glycine
ENSG00000162300.11	21.05	20.2	22.23	19.41	19.85	16.27	ZFPL1	chr11	protein_coding	zinc finger protein-like 1
ENSG00000205488.8	0.11	0.06	0.04	0.1	0.06	0.06	CALML3-AS1	chr10	antisense	CALML3 antisense RNA 1
ENSG00000269964.2	0.01	0	0	0	0	0	MEI4	chr6	protein_coding	meiosis-specific 4 homolog (S. cerevisiae)
ENSG00000138594.12	4.17	4.21	4.76	5.05	5.58	5.72	TMOD3	chr15	protein_coding	tropomodulin 3 (ubiquitous)
ENSG00000280189.1	0.01	0	0.01	0	0	0.04	RP11-491F9.2	chr16	TEC	--
ENSG00000132356.11	4.19	4.41	4.19	4.46	4.58	4.11	PRKAA1	chr5	protein_coding	protein kinase, AMP-activated, alpha 1 catalytic subunit
ENSG00000234705.1	0	0.16	0	0.25	0.32	0.34	HMGA1P4	chr9	antisense	high mobility group AT-hook 1 pseudogene 4
ENSG00000236287.7	4.08	3.69	4.51	4.39	4.9	2.98	ZBED5	chr11	protein_coding	zinc finger, BED-type containing 5
ENSG00000198812.4	0	0	0	0	0	0.01	LRRC10	chr12	protein_coding	leucine rich repeat containing 10
ENSG00000232859.9	0.11	0.05	0.05	0.11	0.13	0.11	LYRM9	chr17	protein_coding	LYR motif containing 9
ENSG00000268758.5	0	0	0	0.01	0	0.02	ADGRE4P	chr19	transcribed_unprocessed_pseudogene	adhesion G protein-coupled receptor E4, pseudogene
ENSG00000070540.12	14.88	14.04	15.85	14.13	13.85	10.82	WIPI1	chr17	protein_coding	WD repeat domain, phosphoinositide interacting 1
ENSG00000148516.21	0.69	0.94	0.91	1.21	1.44	1.39	ZEB1	chr10	protein_coding	zinc finger E-box binding homeobox 1
ENSG00000228060.1	0.15	0.15	0.05	0.05	0	0.05	RP11-69E11.8	chr1	antisense	--
ENSG00000078081.7	0.06	0.07	0.07	0.06	0.08	0.08	LAMP3	chr3	protein_coding	lysosomal-associated membrane protein 3
ENSG00000235437.7	2.56	2.61	2.41	3.08	2.63	2.06	LINC01278	chrX	processed_transcript	long intergenic non-protein coding RNA 1278
ENSG00000068028.17	7.8	8.25	8.99	8.31	9.13	8	RASSF1	chr3	protein_coding	Ras association (RalGDS/AF-6) domain family member 1
ENSG00000051341.13	1.31	1.68	1.32	1.43	1.36	1.63	POLQ	chr3	protein_coding	polymerase (DNA directed), theta
ENSG00000267512.1	0.18	0	0.07	0	0.06	0.12	CTC-250I14.3	chr19	antisense	--
ENSG00000277050.1	0	0	0	0.14	0	0	RP11-102G14.1	chr14	antisense	--
ENSG00000113716.12	7.59	7.99	7.52	7.19	7.87	9.83	HMGXB3	chr5	protein_coding	HMG box domain containing 3
ENSG00000250011.1	0	0	0	0.04	0	0	HMGB1P3	chr2	processed_pseudogene	high mobility group box 1 pseudogene 3
ENSG00000167962.12	12.3	13.93	14.92	13.97	14.38	18.38	ZNF598	chr16	protein_coding	zinc finger protein 598
ENSG00000269489.1	0.29	0.15	0.38	0.1	0.1	0.36	RP11-98D18.17	chr1	lincRNA	--
ENSG00000154342.5	0.01	0	0	0	0	0	WNT3A	chr1	protein_coding	wingless-type MMTV integration site family, member 3A
ENSG00000243609.1	0	0.03	0	0.03	0.03	0.17	RPS2P44	chr16	processed_pseudogene	ribosomal protein S2 pseudogene 44
ENSG00000176208.8	0.9	0.92	0.81	0.95	0.95	1.09	ATAD5	chr17	protein_coding	ATPase family, AAA domain containing 5
ENSG00000150594.6	0	0.01	0	0	0.03	0	ADRA2A	chr10	protein_coding	adrenoceptor alpha 2A
ENSG00000182149.20	21.88	21.28	22.59	17.01	16.59	13.53	IST1	chr16	protein_coding	increased sodium tolerance 1 homolog (yeast)
ENSG00000278974.1	0.03	0.24	0	0.07	0.07	0.07	RP11-756P10.6	chr4	TEC	--
ENSG00000166548.15	1.67	1.58	1.55	2.15	2.18	2.45	TK2	chr16	protein_coding	thymidine kinase 2, mitochondrial
ENSG00000273373.1	1.3	1.71	1.41	1.22	1.33	1.18	RP5-1074L1.4	chr1	antisense	--
ENSG00000267627.5	0.07	0.04	0.04	0.04	0	0.19	RP11-905K4.1	chr18	lincRNA	--
ENSG00000270099.1	0.16	0.22	0.24	0.11	0.17	0.06	RP11-248J23.7	chr10	protein_coding	--
ENSG00000124831.18	6.78	7.95	7.34	9	8.75	11.3	LRRFIP1	chr2	protein_coding	leucine rich repeat (in FLII) interacting protein 1
ENSG00000272949.1	0.24	0.32	0.29	0.37	0.39	0.21	RP11-514P8.8	chr7	processed_transcript	--
ENSG00000135318.11	3.96	3.79	3.85	4.71	4.38	3.14	NT5E	chr6	protein_coding	5'-nucleotidase, ecto (CD73)
ENSG00000257407.1	0.03	0.07	0.04	0	0	0.58	RP11-1028N23.4	chr12	lincRNA	--
ENSG00000213471.8	0.07	0.13	0.06	0.09	0.1	0.09	TTLL13P	chr15	unitary_pseudogene	tubulin tyrosine ligase-like family member 13, pseudogene
ENSG00000187735.12	31.94	26.75	29.63	30.97	31.51	24.19	TCEA1	chr8	protein_coding	transcription elongation factor A (SII), 1
ENSG00000256925.2	0	0.01	0	0.01	0	0	ADGRA1-AS1	chr10	antisense	adhesion G protein-coupled receptor A1 antisense RNA 1
ENSG00000232536.1	0	0	0	0	0	0.05	RP11-74C1.4	chr1	sense_intronic	--
ENSG00000174151.14	1.42	1.77	1.51	1.55	1.51	2.23	CYB561D1	chr1	protein_coding	cytochrome b561 family, member D1
ENSG00000184949.15	0.11	0.11	0.12	0.17	0.16	0.19	FAM227A	chr22	protein_coding	family with sequence similarity 227, member A
ENSG00000157617.16	1.94	2.09	1.88	3.25	3.68	3.58	C2CD2	chr21	protein_coding	C2 calcium-dependent domain containing 2
ENSG00000267645.5	0.45	0.49	0.39	0.51	0.68	0.68	POLR2J2	chr7	protein_coding	polymerase (RNA) II (DNA directed) polypeptide J2
ENSG00000167676.4	0.16	0.23	0.22	0.09	0.13	0.35	PLIN4	chr19	protein_coding	perilipin 4
ENSG00000170011.13	0.01	0	0.02	0.02	0	0.01	MYRIP	chr3	protein_coding	myosin VIIA and Rab interacting protein
ENSG00000121361.3	0	0	0	0.01	0	0	KCNJ8	chr12	protein_coding	potassium channel, inwardly rectifying subfamily J, member 8
ENSG00000227620.4	0	0	0.04	0	0	0	ALG1L8P	chr11	unprocessed_pseudogene	asparagine-linked glycosylation 1-like 8, pseudogene
ENSG00000224769.1	0.03	0.1	0.07	0.11	0.03	0.08	AC069213.1	chr3	unprocessed_pseudogene	--
ENSG00000166483.10	7.8	7.28	7.62	7.94	7.79	6.2	WEE1	chr11	protein_coding	WEE1 G2 checkpoint kinase
ENSG00000264423.2	0	0	0.1	0.09	0.09	0.09	RN7SL718P	chr19	misc_RNA	RNA, 7SL, cytoplasmic 718, pseudogene
ENSG00000142945.12	31.76	29.13	31.41	32.24	32.52	27.93	KIF2C	chr1	protein_coding	kinesin family member 2C
ENSG00000162104.9	5.02	6.03	4.94	5.02	5.12	7.23	ADCY9	chr16	protein_coding	adenylate cyclase 9
ENSG00000280113.1	0	0.04	0	0.17	0.04	0.13	AL357140.1	chr1	protein_coding	--
ENSG00000213139.7	3.58	3.47	3.72	4.02	3.93	3.15	CRYGS	chr3	protein_coding	crystallin, gamma S
ENSG00000157014.10	6.83	7.23	6.86	7.81	8.06	8.88	TATDN2	chr3	protein_coding	TatD DNase domain containing 2
ENSG00000166073.8	0.03	0.04	0.06	0.05	0.06	0.03	GPR176	chr15	protein_coding	G protein-coupled receptor 176
ENSG00000223356.1	0.12	0.12	0	0	0.06	0.07	RP11-66D17.5	chr1	antisense	--
ENSG00000106992.17	16.44	15.14	16.61	18.7	18.28	14.99	AK1	chr9	protein_coding	adenylate kinase 1
ENSG00000206846.1	0.28	3.7	1.59	0.58	1.15	0.61	Y_RNA	chr15	misc_RNA	--
ENSG00000114349.9	0.07	0.01	0.01	0	0	0.02	GNAT1	chr3	protein_coding	guanine nucleotide binding protein (G protein), alpha transducing activity polypeptide 1
ENSG00000183048.11	15.86	16.03	16.06	18.52	19.01	17.94	SLC25A10	chr17	protein_coding	solute carrier family 25 (mitochondrial carrier; dicarboxylate transporter), member 10
ENSG00000228546.2	1.58	0.93	1.68	1.83	1.38	1.29	CTA-313A17.3	chr7	unprocessed_pseudogene	--
ENSG00000250258.1	0	0.06	0.06	0	0.06	0.06	CTC-431G16.2	chr5	antisense	--
ENSG00000237214.3	0.09	0	0.05	0	0	0	RP11-12M9.3	chr22	processed_pseudogene	--
ENSG00000277635.1	0	0.1	0	0	0	0.11	Metazoa_SRP	chr3	misc_RNA	--
ENSG00000228793.1	0.03	0	0	0	0	0.04	RP1-223B1.1	chr6	lincRNA	--
ENSG00000207460.1	0.58	0	0	0.3	0.59	0.62	SNORD116-19	chr15	snoRNA	small nucleolar RNA, C/D box 116-19
ENSG00000267677.1	0.06	0	0	0	0	0	RP11-27G24.1	chr18	lincRNA	--
ENSG00000270170.1	32.17	26.52	30.77	35.3	33.31	26.25	NCBP2-AS2	chr3	protein_coding	NCBP2 antisense RNA 2 (head to head)
ENSG00000261564.1	0	0	0.09	0	0	0	RP11-616M22.10	chr16	unprocessed_pseudogene	--
ENSG00000173862.3	0	0	0	0.03	0.03	0	RP11-89N17.1	chr7	lincRNA	--
ENSG00000101470.9	0.76	0.86	1.13	0.66	0.68	0.29	TNNC2	chr20	protein_coding	troponin C type 2 (fast)
ENSG00000182575.7	0.86	0.85	0.98	1.07	1.14	1.53	NXPH3	chr17	protein_coding	neurexophilin 3
ENSG00000206888.1	0	0	0	0	0	0.27	RNU6-48P	chr1	snRNA	RNA, U6 small nuclear 48, pseudogene
ENSG00000177738.3	0.74	0.8	0.74	0.89	0.75	1.08	CTD-2201E18.3	chr5	sense_overlapping	--
ENSG00000235997.2	0	0	0	0.01	0	0	AC109642.1	chr2	lincRNA	--
ENSG00000257636.6	0	0	0	0	0	0.02	RP11-1103G16.1	chr14	antisense	--
ENSG00000269068.1	0.1	0.05	0.05	0.15	0.15	0	RP11-256I23.2	chr2	antisense	--
ENSG00000171227.6	21.88	18.75	22.38	20.85	19.74	15.52	TMEM37	chr2	protein_coding	transmembrane protein 37
ENSG00000139832.4	20.67	18.98	23.3	18.41	19.37	15.91	RAB20	chr13	protein_coding	RAB20, member RAS oncogene family
ENSG00000178802.17	4.14	4.12	4.42	4.53	4.56	3.54	MPI	chr15	protein_coding	mannose phosphate isomerase
ENSG00000150093.18	94.41	86.68	97.4	107.57	115.17	86.64	ITGB1	chr10	protein_coding	integrin, beta 1 (fibronectin receptor, beta polypeptide, antigen CD29 includes MDF2, MSK12)
ENSG00000076716.8	0.04	0.05	0.03	0.07	0.02	0.03	GPC4	chrX	protein_coding	glypican 4
ENSG00000114841.17	0.06	0.07	0.07	0.03	0.04	0.27	DNAH1	chr3	protein_coding	dynein, axonemal, heavy chain 1
ENSG00000159251.6	0	0	0	0	0.01	0.01	ACTC1	chr15	protein_coding	actin, alpha, cardiac muscle 1
ENSG00000181029.8	0.09	0.1	0.1	0.06	0.09	0.14	TRAPPC5	chr19	protein_coding	trafficking protein particle complex 5
ENSG00000227953.6	0.44	0.88	0.79	0.74	0.67	0.66	LINC01341	chr1	processed_transcript	long intergenic non-protein coding RNA 1341
ENSG00000185825.15	78.12	67.52	81.05	78.01	77.42	63.42	BCAP31	chrX	protein_coding	B-cell receptor-associated protein 31
ENSG00000269293.2	2.46	2.09	2.28	2.32	2.71	2.6	ZSCAN16-AS1	chr6	antisense	ZSCAN16 antisense RNA 1
ENSG00000102978.12	48.12	42.56	46.3	57.3	58.78	41.28	POLR2C	chr16	protein_coding	polymerase (RNA) II (DNA directed) polypeptide C, 33kDa
ENSG00000174407.11	0	0	0.02	0	0	0	MIR1-1HG	chr20	antisense	MIR1-1 host gene
ENSG00000259645.1	0	0	0.04	0	0	0	RP11-253M7.6	chr15	sense_intronic	--
ENSG00000273958.1	0.37	0.12	0	0.13	0.37	0.2	RP11-219B17.3	chr15	lincRNA	--
ENSG00000167286.9	1.18	1	1.6	0.7	0.85	0.83	CD3D	chr11	protein_coding	CD3d molecule, delta (CD3-TCR complex)
ENSG00000125482.12	3.38	3.14	3.1	3.61	3.51	3.74	TTF1	chr9	protein_coding	transcription termination factor, RNA polymerase I
ENSG00000261864.1	0.29	0.83	0.16	0.3	0.1	1.35	RP11-67A1.2	chr16	processed_transcript	--
ENSG00000071189.21	1.05	0.94	0.98	1.05	0.95	0.63	SNX13	chr7	protein_coding	sorting nexin 13
ENSG00000235888.1	0	0.04	0.06	0.02	0.02	0.04	AF064858.8	chr21	lincRNA	--
ENSG00000134186.11	6.92	7.85	6.88	7.48	7.61	7.45	PRPF38B	chr1	protein_coding	pre-mRNA processing factor 38B
ENSG00000225953.2	0	0	0	0	0	0.01	SATB2-AS1	chr2	antisense	SATB2 antisense RNA 1
ENSG00000270175.1	1.24	1.04	1.04	1.45	1.43	1.1	RP11-793H13.11	chr12	antisense	--
ENSG00000266320.1	0	0	0	0	0	0.24	MIR3909	chr22	miRNA	microRNA 3909
ENSG00000225447.1	0.35	0.77	0.08	0.29	0.71	0.37	RPS15AP10	chr1	processed_pseudogene	ribosomal protein S15a pseudogene 10
ENSG00000273167.1	0.02	0.08	0.03	0.05	0.05	1.06	RP11-307N16.6	chr13	protein_coding	--
ENSG00000213638.5	3.77	4.48	4.28	4.21	3.88	3.74	ADAT3	chr19	protein_coding	adenosine deaminase, tRNA-specific 3
ENSG00000131944.9	3.41	3.59	4.45	4.58	4.49	3.45	FAAP24	chr19	protein_coding	--
ENSG00000104442.9	12.3	11.39	11.04	11.55	11.45	8.14	ARMC1	chr8	protein_coding	armadillo repeat containing 1
ENSG00000276427.1	0.2	0.2	0.22	0	0.41	0.43	IGLL4P	chr22	unprocessed_pseudogene	immunoglobulin lambda-like polypeptide 4, pseudogene
ENSG00000070985.13	0.01	0.01	0.01	0	0.01	0.01	TRPM5	chr11	protein_coding	transient receptor potential cation channel, subfamily M, member 5
ENSG00000229463.2	0	0	0	0	0.1	0.05	LYST-AS1	chr1	antisense	LYST antisense RNA 1
ENSG00000198034.10	748.37	632.67	717.18	690.69	674.9	511.85	RPS4X	chrX	protein_coding	ribosomal protein S4, X-linked
ENSG00000253532.1	0	0	0	0	0	0.1	CTD-2340D6.1	chr8	sense_intronic	--
ENSG00000179133.11	0	0	0.01	0	0	0	C10orf67	chr10	protein_coding	chromosome 10 open reading frame 67
ENSG00000270558.1	1.72	2.38	1.98	2.18	2.1	1.94	CTD-2124B8.2	chr5	processed_pseudogene	--
ENSG00000186118.8	0.03	0	0	0.06	0.03	0	TEX38	chr1	protein_coding	testis expressed 38
ENSG00000155026.16	0.01	0.01	0	0.01	0.01	0	RSPH10B	chr7	protein_coding	radial spoke head 10 homolog B (Chlamydomonas)
ENSG00000279159.1	0.17	0.15	0.15	0.11	0.1	0.13	RP3-394A18.1	chr22	antisense	--
ENSG00000171488.14	0.06	0.09	0.09	0.09	0.12	0.07	LRRC8C	chr1	protein_coding	leucine rich repeat containing 8 family, member C
ENSG00000260686.1	0.2	0.15	0.1	0.11	0.1	0.09	CTB-36H16.2	chr5	sense_overlapping	--
ENSG00000158467.16	1.9	2.24	2.15	1.87	1.99	1.62	AHCYL2	chr7	protein_coding	adenosylhomocysteinase-like 2
ENSG00000188735.12	2.69	3.26	3.33	2.56	2.92	4.1	TMEM120B	chr12	protein_coding	transmembrane protein 120B
ENSG00000113327.14	0	0	0	0.01	0	0	GABRG2	chr5	protein_coding	gamma-aminobutyric acid (GABA) A receptor, gamma 2
ENSG00000248863.2	0.13	0.04	0.05	0.04	0.02	0.05	RP11-83A24.1	chr4	transcribed_processed_pseudogene	--
ENSG00000223625.1	0	0	0	0.43	0	0	CYCSP32	chr13	processed_pseudogene	cytochrome c, somatic pseudogene 32
ENSG00000172315.5	12.52	10.89	12.88	12.43	13.12	10.22	TP53RK	chr20	protein_coding	TP53 regulating kinase
ENSG00000153922.10	2.42	2.51	2.34	2.7	2.82	2.57	CHD1	chr5	protein_coding	chromodomain helicase DNA binding protein 1
ENSG00000204172.11	1.8	2.3	2.25	1.92	1.87	2.54	AGAP9	chr10	protein_coding	ArfGAP with GTPase domain, ankyrin repeat and PH domain 9
ENSG00000176108.9	18.04	18.49	20.62	21.57	21.89	18.14	CHMP6	chr17	protein_coding	charged multivesicular body protein 6
ENSG00000117632.20	145.47	122.65	129.18	164.88	161.71	124.71	STMN1	chr1	protein_coding	stathmin 1
ENSG00000007202.14	12.25	13.24	12.24	11.65	11.04	19.91	KIAA0100	chr17	protein_coding	KIAA0100
ENSG00000254884.1	0	0.07	0	0	0	0.42	PRR13P2	chr11	processed_pseudogene	proline rich 13 pseudogene 2
ENSG00000212158.1	0	0	0	0.36	0	0.37	SNORD66	chr3	snoRNA	small nucleolar RNA, C/D box 66
ENSG00000168806.7	1.39	1.42	1.45	1.31	1.53	1.13	LCMT2	chr15	protein_coding	leucine carboxyl methyltransferase 2
ENSG00000158104.11	418.94	385.54	423.78	412.32	413.25	328.31	HPD	chr12	protein_coding	4-hydroxyphenylpyruvate dioxygenase
ENSG00000158764.6	0.07	0	0	0	0	0	ITLN2	chr1	protein_coding	intelectin 2
ENSG00000036672.15	4.62	6.09	5.19	4.75	4.46	4.71	USP2	chr11	protein_coding	ubiquitin specific peptidase 2
ENSG00000254978.2	0	0.1	0.11	0.05	0	0	ALG1L9P	chr11	transcribed_unprocessed_pseudogene	asparagine-linked glycosylation 1-like 9, pseudogene
ENSG00000186834.3	16.36	16.65	15.82	19.73	19.84	22.35	HEXIM1	chr17	protein_coding	hexamethylene bis-acetamide inducible 1
ENSG00000114737.15	2.14	2.54	2.54	2.47	2.36	2.39	CISH	chr3	protein_coding	cytokine inducible SH2-containing protein
ENSG00000154832.14	11.01	11.87	12.96	11.7	12.78	13.86	CXXC1	chr18	protein_coding	CXXC finger protein 1
ENSG00000117360.12	11.58	11.28	11	14.6	14.49	13.43	PRPF3	chr1	protein_coding	pre-mRNA processing factor 3
ENSG00000066044.13	15.23	16.44	15.6	17.42	16.76	14.6	ELAVL1	chr19	protein_coding	ELAV like RNA binding protein 1
ENSG00000154545.16	0.03	0.08	0.02	0.03	0.06	0.02	MAGED4	chrX	protein_coding	melanoma antigen family D4
ENSG00000279456.1	0	0.03	0.02	0.02	0.02	0	RP11-87H9.5	chr9	TEC	--
ENSG00000266308.2	0.41	0.61	0.45	0.21	0.21	1.08	RN7SL510P	chr15	misc_RNA	RNA, 7SL, cytoplasmic 510, pseudogene
ENSG00000171988.17	2.26	2.69	2.59	2.75	2.81	3.06	JMJD1C	chr10	protein_coding	jumonji domain containing 1C
ENSG00000204528.3	0.23	0.27	0	0.14	0.41	0.48	PSORS1C3	chr6	sense_intronic	psoriasis susceptibility 1 candidate 3 (non-protein coding)
ENSG00000153531.12	0.47	0.48	0.54	0.88	0.88	0.59	ADPRHL1	chr13	protein_coding	ADP-ribosylhydrolase like 1
ENSG00000230894.1	0	0.01	0	0	0.01	0.01	RP11-67K19.3	chr9	antisense	--
ENSG00000279273.1	0	0.01	0	0	0	0.04	CTD-2526A2.4	chr17	TEC	--
ENSG00000043093.13	2.76	2.52	2.75	2.61	2.69	1.92	DCUN1D1	chr3	protein_coding	DCN1, defective in cullin neddylation 1, domain containing 1
ENSG00000265018.6	0.62	1.12	0.88	0.57	0.63	0.79	CTGLF12P	chr10	transcribed_unprocessed_pseudogene	centaurin, gamma-like family, member 12 pseudogene
ENSG00000275092.1	0.37	0.52	0.33	0.65	0.56	0.55	LA16c-329F2.2	chr16	sense_intronic	--
ENSG00000099968.17	2.24	2.01	2.3	3.24	3.04	2.83	BCL2L13	chr22	protein_coding	BCL2-like 13 (apoptosis facilitator)
ENSG00000274628.4	0	0	0	0	0	0.02	FAM95B1	chr9	processed_transcript	family with sequence similarity 95, member B1
ENSG00000196636.7	6.36	6.07	6.69	7.62	7.88	6.04	SDHAF3	chr7	protein_coding	succinate dehydrogenase complex assembly factor 3
ENSG00000272419.5	0.19	0.2	0.26	0.23	0.22	0.41	RP11-403I13.8	chr1	processed_transcript	--
ENSG00000130643.8	0.06	0.07	0.08	0.14	0.25	0.29	CALY	chr10	protein_coding	calcyon neuron-specific vesicular protein
ENSG00000186715.10	6.36	8.7	7.66	5.49	6.48	8.24	MST1L	chr1	transcribed_unprocessed_pseudogene	macrophage stimulating 1-like
ENSG00000111846.15	4.33	4.11	4.53	3.78	3.44	2.81	GCNT2	chr6	protein_coding	glucosaminyl (N-acetyl) transferase 2, I-branching enzyme (I blood group)
ENSG00000126970.15	1.62	1.55	1.78	1.9	2.18	1.62	ZC4H2	chrX	protein_coding	zinc finger, C4H2 domain containing
ENSG00000196110.7	0.02	0.07	0.02	0.04	0.03	0.03	ZNF699	chr19	protein_coding	zinc finger protein 699
ENSG00000259175.1	0	0.01	0.02	0	0.01	0	RP11-379K22.2	chr15	antisense	--
ENSG00000184106.8	0.03	0.03	0	0	0	0	TREML3P	chr6	transcribed_unprocessed_pseudogene	triggering receptor expressed on myeloid cells-like 3, pseudogene
ENSG00000141699.10	11.82	12.37	12.7	12.07	12.65	12.61	FAM134C	chr17	protein_coding	family with sequence similarity 134, member C
ENSG00000225724.1	0	0	0.02	0	0	0	LL22NC03-80A10.11	chr22	unprocessed_pseudogene	--
ENSG00000167491.17	9.85	10.49	9.36	11.74	11.72	16.28	GATAD2A	chr19	protein_coding	GATA zinc finger domain containing 2A
ENSG00000230026.2	0	0.02	0	0.02	0	0.04	RP11-382D8.5	chr1	processed_pseudogene	--
ENSG00000119705.9	53.76	45.33	51.68	52.76	53.31	46.21	SLIRP	chr14	protein_coding	SRA stem-loop interacting RNA binding protein
ENSG00000099365.9	0.5	0.77	0.56	0.5	0.59	1.27	STX1B	chr16	protein_coding	syntaxin 1B
ENSG00000204003.8	0.25	0.21	0.1	0.24	0.28	0.36	RP11-216L13.16	chr9	protein_coding	--
ENSG00000273151.1	0.02	0.04	0.03	0.02	0.03	0.05	RP11-449P15.2	chr7	antisense	--
ENSG00000278737.1	0	0.13	0.05	0.18	0.04	0.14	RP11-325L12.7	chr15	lincRNA	--
ENSG00000231508.1	0	0.08	0	0	0	0.24	RP11-452K12.6	chr10	processed_pseudogene	--
ENSG00000276237.1	0.5	0.74	0	0	0	0	AP003307.1	chr11	miRNA	--
ENSG00000260017.1	0	0.07	0	0.08	0	0	RP11-1035H13.2	chr16	antisense	--
ENSG00000134058.10	26.98	23.18	24.26	25.87	26.62	18.35	CDK7	chr5	protein_coding	cyclin-dependent kinase 7
ENSG00000279864.1	0	0	0.16	0	0	0	RP11-570J4.1	chr21	processed_pseudogene	--
ENSG00000140832.9	1.8	1.92	1.93	1.71	1.42	1.39	MARVELD3	chr16	protein_coding	MARVEL domain containing 3
ENSG00000275695.1	0.12	0	0.07	0	0.12	0.25	UBE2Q2P6	chr15	transcribed_unprocessed_pseudogene	ubiquitin-conjugating enzyme E2Q family member 2 pseudogene 6
ENSG00000257022.1	0	0.05	0.06	0	0	0	RP11-729I10.2	chr12	antisense	--
ENSG00000263776.1	0.78	1.36	1.52	0.4	0.98	0.82	SNORA4	chr3	snoRNA	small nucleolar RNA, H/ACA box 4
ENSG00000198270.12	2.62	2.55	2.26	2.77	3.38	2.26	TMEM116	chr12	protein_coding	transmembrane protein 116
ENSG00000180539.7	0.06	0.08	0.09	0.05	0.04	0.07	C9orf139	chr9	antisense	chromosome 9 open reading frame 139
ENSG00000276171.1	5.95	2.13	18.98	8.7	8.61	5.42	AC114498.1	chr1	miRNA	--
ENSG00000120910.14	4.48	3.94	4	4.65	5.05	4.09	PPP3CC	chr8	protein_coding	protein phosphatase 3, catalytic subunit, gamma isozyme
ENSG00000140553.16	10.02	10.41	10.92	12.94	14.15	19.38	UNC45A	chr15	protein_coding	unc-45 homolog A (C. elegans)
ENSG00000236698.1	0	0.06	0	0	0	0	EIF1AXP1	chr1	processed_pseudogene	eukaryotic translation initiation factor 1A, X-linked pseudogene 1
ENSG00000105879.11	3.43	3.4	3.36	3.56	3.39	2.77	CBLL1	chr7	protein_coding	Cbl proto-oncogene-like 1, E3 ubiquitin protein ligase
ENSG00000163682.15	823.07	652.98	780.24	706.58	690.89	538.79	RPL9	chr4	protein_coding	ribosomal protein L9
ENSG00000206625.1	0	0	0	0	0	0.27	RNU6-1	chr15	snRNA	RNA, U6 small nuclear 1
ENSG00000279613.1	0.03	0	0	0	0.03	0.03	RP13-638C3.5	chr17	TEC	--
ENSG00000138709.17	4.21	4	3.96	3.62	3.69	2.84	LARP1B	chr4	protein_coding	La ribonucleoprotein domain family, member 1B
ENSG00000152056.16	2.57	2.47	2.56	2.42	2.49	2.58	AP1S3	chr2	protein_coding	adaptor-related protein complex 1, sigma 3 subunit
ENSG00000263142.5	0	0.01	0.01	0	0.01	0.03	LRRC37A17P	chr17	transcribed_unprocessed_pseudogene	leucine rich repeat containing 37, member A17, pseudogene
ENSG00000244256.3	0	0	0.1	0.09	0	0.28	RN7SL130P	chr1	misc_RNA	RNA, 7SL, cytoplasmic 130, pseudogene
ENSG00000074771.3	0	0.03	0	0.01	0.05	0	NOX3	chr6	protein_coding	NADPH oxidase 3
ENSG00000151665.12	25.38	20.99	22.79	22.07	22.32	16.76	PIGF	chr2	protein_coding	phosphatidylinositol glycan anchor biosynthesis, class F
ENSG00000282508.1	1.69	2.29	2.1	1.57	1.63	2.46	LINC01002	chr19	processed_transcript	long intergenic non-protein coding RNA 1002
ENSG00000230042.1	0.04	0.08	0.09	0.12	0.33	0.17	AK3P3	chr7	processed_pseudogene	adenylate kinase 3 pseudogene 3
ENSG00000236412.1	0.03	0.05	0	0.05	0	0.08	RP11-132N15.2	chr3	lincRNA	--
ENSG00000230952.1	3.31	3.53	3.38	3.41	3.76	4.45	AC099344.2	chr2	lincRNA	--
ENSG00000234585.6	2.58	3.04	2.81	2.99	3.31	2.69	CCT6P3	chr7	transcribed_unprocessed_pseudogene	chaperonin containing TCP1, subunit 6 (zeta) pseudogene 3
ENSG00000253760.1	0	0	0	0	0	0.06	RP11-48B3.2	chr8	processed_pseudogene	--
ENSG00000179058.6	0	0	0	0	0.02	0	C9orf50	chr9	protein_coding	chromosome 9 open reading frame 50
ENSG00000180638.17	0.07	0.01	0.01	0	0.03	0.01	SLC47A2	chr17	protein_coding	solute carrier family 47 (multidrug and toxin extrusion), member 2
ENSG00000128714.5	0.01	0	0.01	0.01	0	0	HOXD13	chr2	protein_coding	homeobox D13
ENSG00000155561.14	8.19	8.12	7.46	8.72	9.06	7.11	NUP205	chr7	protein_coding	nucleoporin 205kDa
ENSG00000182685.7	0.98	1.02	1.19	0.8	0.92	1.39	BRICD5	chr16	protein_coding	BRICHOS domain containing 5
ENSG00000171105.13	4.5	5.75	4.7	4.21	4.28	5.86	INSR	chr19	protein_coding	insulin receptor
ENSG00000241255.1	0.2	0.07	0	0.14	0	0	RP1-89D4.1	chr11	processed_pseudogene	--
ENSG00000081026.18	0.92	0.9	0.84	0.97	1.07	1.45	MAGI3	chr1	protein_coding	membrane associated guanylate kinase, WW and PDZ domain containing 3
ENSG00000266173.5	9.58	9.74	10.17	10.72	10.46	9.28	STRADA	chr17	protein_coding	STE20-related kinase adaptor alpha
ENSG00000213185.6	0.14	0.25	0.52	0.22	0.14	0.15	FAM24B	chr10	protein_coding	family with sequence similarity 24, member B
ENSG00000076344.15	0.02	0.03	0.04	0.02	0.03	0.13	RGS11	chr16	protein_coding	regulator of G-protein signaling 11
ENSG00000225166.1	0	0.03	0	0	0	0	AC012462.2	chr2	lincRNA	--
ENSG00000136237.18	1.03	1.27	1.03	1.31	1.25	1.31	RAPGEF5	chr7	protein_coding	Rap guanine nucleotide exchange factor (GEF) 5
ENSG00000198972.2	0	0	0	0	0	0.26	MIRLET7E	chr19	miRNA	microRNA let-7e
ENSG00000185697.16	0.41	0.49	0.52	0.65	0.73	0.46	MYBL1	chr8	protein_coding	v-myb avian myeloblastosis viral oncogene homolog-like 1
ENSG00000177302.14	4.05	4.34	3.78	4.13	3.6	7.74	TOP3A	chr17	protein_coding	topoisomerase (DNA) III alpha
ENSG00000250257.1	0.04	0	0	0	0	0	LDHAL6DP	chr11	unprocessed_pseudogene	lactate dehydrogenase A-like 6D, pseudogene
ENSG00000172548.14	0	0	0.01	0	0	0	NIPAL4	chr5	protein_coding	NIPA-like domain containing 4
ENSG00000184857.7	13	13.07	13.58	15.63	14.96	12.89	TMEM186	chr16	protein_coding	transmembrane protein 186
ENSG00000160401.14	0	0	0	0	0.01	0.06	C9orf117	chr9	protein_coding	chromosome 9 open reading frame 117
ENSG00000091181.19	0.03	0.04	0.06	0.03	0.02	0.09	IL5RA	chr3	protein_coding	interleukin 5 receptor, alpha
ENSG00000130768.14	1.95	2.38	2.36	0.7	0.73	0.94	SMPDL3B	chr1	protein_coding	sphingomyelin phosphodiesterase, acid-like 3B
ENSG00000146648.15	0.23	0.24	0.2	0.26	0.29	0.32	EGFR	chr7	protein_coding	epidermal growth factor receptor
ENSG00000063169.10	0.88	1.33	1.18	1.28	1.2	2.26	GLTSCR1	chr19	protein_coding	glioma tumor suppressor candidate region gene 1
ENSG00000276717.1	0.11	0.05	0	0.05	0.11	0.06	RP11-62C3.10	chr9	unprocessed_pseudogene	--
ENSG00000138231.12	4.8	4.52	4.65	4.12	4.29	3.29	DBR1	chr3	protein_coding	debranching RNA lariats 1
ENSG00000132872.11	0	0	0	0	0	0.01	SYT4	chr18	protein_coding	synaptotagmin IV
ENSG00000255275.3	11.92	11.99	12.83	15.14	14.89	25.65	RP13-279N23.2	chr1	protein_coding	--
ENSG00000232600.3	0	0.06	0	0	0.13	0.33	TONSL-AS1	chr8	antisense	TONSL antisense RNA 1
ENSG00000134717.17	12.02	9.93	11.13	13.19	13.46	9.94	BTF3L4	chr1	protein_coding	basic transcription factor 3-like 4
ENSG00000172382.9	0.26	0.5	0.5	0.39	0.62	0.48	PRSS27	chr16	protein_coding	protease, serine 27
ENSG00000104518.10	10.93	10.99	13.13	12.65	13.59	13.2	GSDMD	chr8	protein_coding	gasdermin D
ENSG00000261526.2	3.83	3.28	3.57	3.84	3.3	2.85	CTB-31O20.2	chr19	lincRNA	--
ENSG00000120942.13	13.65	13.54	14.13	12.69	13.02	10.18	UBIAD1	chr1	protein_coding	UbiA prenyltransferase domain containing 1
ENSG00000232940.5	0.05	0.03	0.09	0.08	0.14	0.34	HCG25	chr6	antisense	HLA complex group 25 (non-protein coding)
ENSG00000178502.5	0.03	0.04	0.09	0.05	0.08	0.67	KLHL11	chr17	protein_coding	kelch-like family member 11
ENSG00000274001.1	0.06	0.06	0	0.06	0	0.06	RP11-5G9.5	chr13	sense_intronic	--
ENSG00000170954.11	0	0.01	0	0	0.01	0.01	ZNF415	chr19	protein_coding	zinc finger protein 415
ENSG00000106524.8	4.6	4.36	4.57	5.62	5.29	4.2	ANKMY2	chr7	protein_coding	ankyrin repeat and MYND domain containing 2
ENSG00000234945.7	0	0.09	0	0	0	0.03	GTF3C2-AS1	chr2	antisense	GTF3C2 antisense RNA 1
ENSG00000166863.11	0.19	0.17	0.21	0.52	0.24	0.34	TAC3	chr12	protein_coding	tachykinin 3
ENSG00000140274.13	0.05	0.05	0.03	0	0	0	DUOXA2	chr15	protein_coding	dual oxidase maturation factor 2
ENSG00000223959.8	1.51	1.73	1.65	1.29	1.31	2.37	AFG3L1P	chr16	unitary_pseudogene	AFG3-like AAA ATPase 1, pseudogene
ENSG00000263456.1	0	0	0	0	0	1	MIR5189	chr16	miRNA	microRNA 5189
ENSG00000224315.2	0	0.19	0	0.04	0.04	0.36	RPL7P7	chr1	processed_pseudogene	ribosomal protein L7 pseudogene 7
ENSG00000228156.1	0	0	0	0	0.07	0	RP11-410N8.1	chr20	antisense	--
ENSG00000115091.11	26.52	23.83	26.4	33.83	34.66	26.02	ACTR3	chr2	protein_coding	ARP3 actin-related protein 3 homolog (yeast)
ENSG00000189280.3	0.02	0	0.07	0.06	0.02	0	GJB5	chr1	protein_coding	gap junction protein, beta 5, 31.1kDa
ENSG00000226279.2	0	0	0.06	0.06	0.05	0	AC005682.7	chr7	processed_pseudogene	--
ENSG00000183605.16	50	43.03	47.11	46.63	45.52	34.53	SFXN4	chr10	protein_coding	sideroflexin 4
ENSG00000235670.1	0	0	0	0.06	0	0	RPL21P40	chr3	processed_pseudogene	ribosomal protein L21 pseudogene 40
ENSG00000152256.13	1.21	1.1	1.06	1.06	1.06	0.93	PDK1	chr2	protein_coding	pyruvate dehydrogenase kinase, isozyme 1
ENSG00000273521.1	0.2	0.1	0.05	0.1	0.07	0.18	RP11-45A17.4	chr10	antisense	--
ENSG00000100711.13	19.42	17.13	17.39	26.6	28.78	22.56	ZFYVE21	chr14	protein_coding	zinc finger, FYVE domain containing 21
ENSG00000196620.8	0.09	0.07	0.15	0.1	0.01	0.04	UGT2B15	chr4	protein_coding	UDP glucuronosyltransferase 2 family, polypeptide B15
ENSG00000099910.16	2.9	2.98	2.96	3.56	4.05	4.02	KLHL22	chr22	protein_coding	kelch-like family member 22
ENSG00000264047.2	0	0.28	0	0	0	0.1	RN7SL455P	chr2	misc_RNA	RNA, 7SL, cytoplasmic 455, pseudogene
ENSG00000112787.12	6.95	9.88	8.71	8.89	9.04	11.41	FBRSL1	chr12	protein_coding	fibrosin-like 1
ENSG00000141127.14	12.9	12.73	12.77	12.37	12.1	9.5	PRPSAP2	chr17	protein_coding	phosphoribosyl pyrophosphate synthetase-associated protein 2
ENSG00000273143.1	0	0.04	0.05	0	0.09	0.05	RP11-525A16.4	chr10	lincRNA	--
ENSG00000266120.1	0	0	0	0.12	0	0.13	RP11-354P11.2	chr17	antisense	--
ENSG00000234816.2	0	0	0.08	0	0	0.08	U91328.2	chr6	unprocessed_pseudogene	--
ENSG00000203760.8	63.06	54.77	62.27	76.61	71.84	62.24	CENPW	chr6	protein_coding	centromere protein W
ENSG00000258640.3	0.06	0.23	0	0	0	0.18	RPL21P5	chr14	processed_pseudogene	ribosomal protein L21 pseudogene 5
ENSG00000203880.11	4.53	4.95	4.37	6.32	6.67	5.57	PCMTD2	chr20	protein_coding	protein-L-isoaspartate (D-aspartate) O-methyltransferase domain containing 2
ENSG00000279648.1	0	0.01	0.01	0	0.01	0.01	AP000432.3	chr21	TEC	--
ENSG00000223404.3	0.04	0	0	0	0.09	0.09	LINC00397	chr13	lincRNA	long intergenic non-protein coding RNA 397
ENSG00000170185.9	1.23	1.11	1.24	1.13	1.24	0.86	USP38	chr4	protein_coding	ubiquitin specific peptidase 38
ENSG00000133773.11	15.83	13.13	13.28	15.83	14.76	11.9	CCDC59	chr12	protein_coding	coiled-coil domain containing 59
ENSG00000171970.12	3.48	3.57	3.12	3.5	3.36	2.69	ZNF57	chr19	protein_coding	zinc finger protein 57
ENSG00000204278.12	0.05	0.04	0.08	0.1	0.11	0.14	TMEM235	chr17	protein_coding	transmembrane protein 235
ENSG00000185986.11	2.63	2.56	3.16	3.53	2.82	4.88	SDHAP3	chr5	transcribed_unprocessed_pseudogene	succinate dehydrogenase complex, subunit A, flavoprotein pseudogene 3
ENSG00000137871.19	1.34	1.3	1.41	1.16	1.24	0.85	ZNF280D	chr15	protein_coding	zinc finger protein 280D
ENSG00000101266.16	29.83	28.57	31.12	32.11	32.72	25.78	CSNK2A1	chr20	protein_coding	casein kinase 2, alpha 1 polypeptide
ENSG00000272393.1	0	0	0	0	0.26	0	RNU6-92P	chr7	snRNA	RNA, U6 small nuclear 92, pseudogene
ENSG00000278952.1	0.27	0.17	0.67	0.34	0.54	0.25	RP11-399J13.2	chr11	TEC	--
ENSG00000064995.16	29.08	25.8	27.77	30.59	32.84	26.06	TAF11	chr6	protein_coding	TAF11 RNA polymerase II, TATA box binding protein (TBP)-associated factor, 28kDa
ENSG00000134987.11	3.49	3.31	3.41	3.24	3.43	2.35	WDR36	chr5	protein_coding	WD repeat domain 36
ENSG00000138735.15	0.06	0.04	0.08	0.07	0.07	0.04	PDE5A	chr4	protein_coding	phosphodiesterase 5A, cGMP-specific
ENSG00000226944.1	0.5	0.28	0.08	0.51	0.43	0.3	RP1-120G22.11	chr1	antisense	--
ENSG00000250329.1	0	0	0	0.02	0	0	KDELC1P1	chr5	processed_pseudogene	KDEL (Lys-Asp-Glu-Leu) containing 1 pseudogene 1
ENSG00000154118.12	0	0	0.01	0	0	0.01	JPH3	chr16	protein_coding	junctophilin 3
ENSG00000273416.1	0.56	0.62	1.04	0.45	0.38	0.53	RP4-597N16.4	chr1	lincRNA	--
ENSG00000279382.1	0	0	0	0	0	0.08	RP11-449J21.3	chr17	TEC	--
ENSG00000250350.1	0	0	0	0.34	0	0.17	RP11-731D1.3	chr4	unprocessed_pseudogene	--
ENSG00000271095.1	0	0	0	0.02	0.02	0.02	BNIP3P28	chr19	processed_pseudogene	BCL2/adenovirus E1B 19kDa interacting protein 3 pseudogene 28
ENSG00000275718.1	6.54	7.01	7.38	5.77	5.73	3.77	CCL15	chr17	protein_coding	chemokine (C-C motif) ligand 15
ENSG00000249192.1	0	0	0	0	0	0.21	CTB-36O1.3	chr5	processed_pseudogene	--
ENSG00000265083.1	0.3	0	0	0	0	0	MIR3691	chr6	miRNA	microRNA 3691
ENSG00000221955.10	0.07	0.07	0.06	0.04	0.04	0.05	SLC12A8	chr3	protein_coding	solute carrier family 12, member 8
ENSG00000131484.4	0.29	0.34	0.27	0.15	0.35	0.47	RP11-798G7.5	chr17	antisense	--
ENSG00000213601.3	0	0	0	0.04	0	0	KRT18P19	chr2	processed_pseudogene	keratin 18 pseudogene 19
ENSG00000258942.1	0	0	0.04	0	0	0	RP11-255G12.2	chr14	lincRNA	--
ENSG00000154608.13	0	0.01	0	0	0.01	0.02	CEP170P1	chr4	transcribed_unprocessed_pseudogene	centrosomal protein 170kDa pseudogene 1
ENSG00000166246.13	0	0.07	0.05	0.01	0.04	0.03	C16orf71	chr16	protein_coding	chromosome 16 open reading frame 71
ENSG00000169299.13	8.03	7.18	7.16	7.95	7.72	6.11	PGM2	chr4	protein_coding	phosphoglucomutase 2
ENSG00000278861.1	0	0.18	0	0	0	0.66	RP11-338K17.6	chr12	TEC	--
ENSG00000254429.1	0.05	0.05	0	0	0	0	CTD-2562J17.7	chr11	antisense	--
ENSG00000251314.2	0.02	0	0.04	0	0.02	0	CTD-2337A12.1	chr5	antisense	--
ENSG00000213762.10	1.77	1.5	1.46	2.76	2.47	2.51	ZNF134	chr19	protein_coding	zinc finger protein 134
ENSG00000206715.1	0	0.25	0	0	0.25	0	RNU6-444P	chr6	snRNA	RNA, U6 small nuclear 444, pseudogene
ENSG00000230465.1	0	0.06	0	0	0	0	VENTXP4	chr3	processed_pseudogene	VENT homeobox pseudogene 4
ENSG00000111199.10	7.07	7.52	9.22	3.49	3.78	3.55	TRPV4	chr12	protein_coding	transient receptor potential cation channel, subfamily V, member 4
ENSG00000233441.6	0	0	0	0	0.02	0	CYP2AB1P	chr3	transcribed_unprocessed_pseudogene	cytochrome P450, family 2, subfamily AB, polypeptide 1, pseudogene
ENSG00000165501.16	10.76	8.18	8.53	9.7	9.26	8.25	LRR1	chr14	protein_coding	leucine rich repeat protein 1
ENSG00000106263.17	83.64	82.6	86.04	95.08	91.04	91.32	EIF3B	chr7	protein_coding	eukaryotic translation initiation factor 3, subunit B
ENSG00000234241.1	0	0.02	0	0	0	0	RP4-775C13.1	chr20	processed_pseudogene	--
ENSG00000166762.16	0.15	0.21	0.11	0.19	0.26	0.23	CATSPER2	chr15	protein_coding	cation channel, sperm associated 2
ENSG00000143344.15	5.64	5.71	6.1	5.36	5.86	5.64	RGL1	chr1	protein_coding	ral guanine nucleotide dissociation stimulator-like 1
ENSG00000132386.10	234.14	222.72	239.14	200.73	190.39	146.97	SERPINF1	chr17	protein_coding	serpin peptidase inhibitor, clade F (alpha-2 antiplasmin, pigment epithelium derived factor), member 1
ENSG00000240015.2	0	0	0	0	0.04	0.27	RP11-90P5.5	chr8	antisense	--
ENSG00000281752.1	0	0	0.41	0	0	0.2	AC055714.1	chr3	miRNA	--
ENSG00000063438.16	0.13	0.21	0.15	0.12	0.13	0.31	AHRR	chr5	protein_coding	aryl-hydrocarbon receptor repressor
ENSG00000168090.9	53.78	48.54	56.19	55.1	52.47	43.97	COPS6	chr7	protein_coding	COP9 signalosome subunit 6
ENSG00000279228.1	0	0.06	0	0	0	0	RP11-345J4.4	chr16	TEC	--
ENSG00000003393.14	2.7	2.49	2.9	2.8	2.95	2.99	ALS2	chr2	protein_coding	amyotrophic lateral sclerosis 2 (juvenile)
ENSG00000169246.16	1.74	3.58	2.59	1.65	2.12	2.86	NPIPB3	chr16	protein_coding	nuclear pore complex interacting protein family, member B3
ENSG00000277253.1	0	0	0	0	0	0.01	RP13-580B18.2	chr7	processed_pseudogene	--
ENSG00000119720.17	0.89	1	0.89	0.85	0.88	1.19	NRDE2	chr14	protein_coding	NRDE-2, necessary for RNA interference, domain containing
ENSG00000114480.12	8.55	7.78	8.85	7.98	7.84	5.87	GBE1	chr3	protein_coding	glucan (1,4-alpha-), branching enzyme 1
ENSG00000265600.1	0.27	0.54	0	0.82	0.54	1.14	AC006480.1	chr7	miRNA	--
ENSG00000238837.3	0	0	0	0	0	0.05	RP11-646E18.2	chr3	lincRNA	--
ENSG00000267030.1	0.35	0.45	0.28	0.15	0.45	1.63	CTB-50L17.7	chr19	antisense	--
ENSG00000204267.13	1.55	1.36	1.59	1.66	1.58	1.46	TAP2	chr6	protein_coding	transporter 2, ATP-binding cassette, sub-family B (MDR/TAP)
ENSG00000269867.1	0	0.04	0	0	0.04	0.13	CTD-2583A14.8	chr19	sense_intronic	--
ENSG00000109181.11	12.33	10.86	11.59	10.77	9.73	6.1	UGT2B10	chr4	protein_coding	UDP glucuronosyltransferase 2 family, polypeptide B10
ENSG00000133794.17	1.13	1.12	1.16	1.06	1.03	0.85	ARNTL	chr11	protein_coding	aryl hydrocarbon receptor nuclear translocator-like
ENSG00000116514.16	13.5	13.08	13.89	13.34	13.69	11.36	RNF19B	chr1	protein_coding	ring finger protein 19B
ENSG00000254486.1	0.02	0	0.01	0.02	0	0.03	RP13-631K18.2	chr11	lincRNA	--
ENSG00000257761.1	0	0.05	0	0	0	0	RP11-186F10.2	chr12	antisense	--
ENSG00000132481.6	36.14	37.69	38.9	35.42	35.9	33.35	TRIM47	chr17	protein_coding	tripartite motif containing 47
ENSG00000129933.20	5.2	5.6	5.63	5.14	5.11	5.9	MAU2	chr19	protein_coding	MAU2 sister chromatid cohesion factor
ENSG00000131724.10	32.32	31.12	33.24	27.85	26.31	20.95	IL13RA1	chrX	protein_coding	interleukin 13 receptor, alpha 1
ENSG00000131475.6	103.08	88.99	100.73	129.57	127.8	101.72	VPS25	chr17	protein_coding	vacuolar protein sorting 25 homolog (S. cerevisiae)
ENSG00000153093.18	0	0.01	0	0	0	0.01	ACOXL	chr2	protein_coding	acyl-CoA oxidase-like
ENSG00000279883.1	0	0.08	0	0	0	0	CTD-2315M5.2	chr5	TEC	--
ENSG00000279377.1	0.03	0.04	0.02	0.01	0.01	0	AC003973.3	chr19	TEC	--
ENSG00000214832.5	0.07	0.05	0.06	0.06	0.02	0.02	UPF3AP2	chr17	transcribed_processed_pseudogene	UPF3A pseudogene 2
ENSG00000255292.6	0.05	0	0	0	0	0	AP002884.2	chr11	protein_coding	--
ENSG00000106305.9	51.88	45.48	51.75	58.79	63.57	45.35	AIMP2	chr7	protein_coding	aminoacyl tRNA synthetase complex-interacting multifunctional protein 2
ENSG00000163739.4	0.02	0.02	0.08	0.05	0.15	0.05	CXCL1	chr4	protein_coding	chemokine (C-X-C motif) ligand 1 (melanoma growth stimulating activity, alpha)
ENSG00000237991.3	0.07	0	0	0	0	0	RPL35P1	chr1	processed_pseudogene	ribosomal protein L35 pseudogene 1
ENSG00000108448.20	3.17	2.6	3.38	2.64	2.44	2.29	TRIM16L	chr17	protein_coding	tripartite motif containing 16-like
ENSG00000157426.13	1.8	1.9	1.88	1.8	2	1.37	AASDH	chr4	protein_coding	aminoadipate-semialdehyde dehydrogenase
ENSG00000146005.3	0.17	0.1	0.11	0.13	0.15	0.18	PSD2	chr5	protein_coding	pleckstrin and Sec7 domain containing 2
ENSG00000236197.2	0	0	0.01	0	0	0	AC002429.5	chr7	antisense	--
ENSG00000279654.1	0	0	0	0	0	0.15	AL135745.1	chr14	protein_coding	--
ENSG00000065308.4	18.6	19.8	18.93	17.34	18.8	20.44	TRAM2	chr6	protein_coding	translocation associated membrane protein 2
ENSG00000104723.20	3.33	2.91	3.52	2.49	2.19	1.68	TUSC3	chr8	protein_coding	tumor suppressor candidate 3
ENSG00000228620.1	0.14	0.14	0.22	0.1	0.39	0.26	RP3-434P1.6	chr22	antisense	--
ENSG00000069122.18	0	0	0.01	0	0	0	ADGRF5	chr6	protein_coding	adhesion G protein-coupled receptor F5
ENSG00000135469.13	7.28	7.11	6.99	6.36	5.34	5.17	COQ10A	chr12	protein_coding	coenzyme Q10 homolog A (S. cerevisiae)
ENSG00000255893.1	0.14	0.14	0.1	0	0.09	0.39	RP11-685N10.1	chr11	antisense	--
ENSG00000239393.1	0	0	0.08	0	0	0	CTD-2301A4.1	chr5	processed_pseudogene	--
ENSG00000106692.13	1.26	1.41	1.3	1.33	1.24	0.95	FKTN	chr9	protein_coding	fukutin
ENSG00000057757.9	27.51	25.38	24.97	31.16	32.68	25.22	PITHD1	chr1	protein_coding	PITH (C-terminal proteasome-interacting domain of thioredoxin-like) domain containing 1
ENSG00000251281.1	0	0	0	0.06	0	0	CTD-2066L21.2	chr5	lincRNA	--
ENSG00000124557.12	0.12	0.07	0.13	0.39	0.37	0.18	BTN1A1	chr6	protein_coding	butyrophilin, subfamily 1, member A1
ENSG00000150672.16	0.01	0.01	0	0.01	0.01	0.01	DLG2	chr11	protein_coding	discs, large homolog 2 (Drosophila)
ENSG00000122034.12	71.49	60.99	62.79	93.76	89.61	67.71	GTF3A	chr13	protein_coding	general transcription factor IIIA
ENSG00000100379.17	3.14	3	3.84	4.1	5.36	5.04	KCTD17	chr22	protein_coding	potassium channel tetramerization domain containing 17
ENSG00000257553.1	0.25	0.62	0.55	0.44	0.81	0.66	RP11-603J24.17	chr12	antisense	--
ENSG00000134042.12	0	0.01	0	0	0	0.02	MRO	chr18	protein_coding	maestro
ENSG00000259922.1	0.03	0	0	0	0	0	RP11-322D14.1	chr16	processed_pseudogene	--
ENSG00000170946.14	1.87	1.75	1.78	1.85	1.76	1.59	DNAJC24	chr11	protein_coding	DnaJ (Hsp40) homolog, subfamily C, member 24
ENSG00000198482.10	0.27	0.19	0.14	0.27	0.19	0.86	ZNF808	chr19	protein_coding	zinc finger protein 808
ENSG00000066056.13	0.47	0.48	0.67	0.41	0.57	0.7	TIE1	chr1	protein_coding	tyrosine kinase with immunoglobulin-like and EGF-like domains 1
ENSG00000187688.14	9.5	9.15	10.9	13.26	15.21	16.09	TRPV2	chr17	protein_coding	transient receptor potential cation channel, subfamily V, member 2
ENSG00000278941.1	0	0.14	0	0	0	0.08	SMG6-IT1	chr17	TEC	SMG6 intronic transcript 1
ENSG00000274079.1	0.19	0.09	0.11	0	0.1	0.5	Metazoa_SRP	chr15	misc_RNA	--
ENSG00000225914.1	0.32	0.74	0.29	0.32	0.34	1.23	XXbac-BPG154L12.4	chr6	antisense	--
ENSG00000135932.10	10.5	10.29	10.3	11.68	12.35	9.23	CAB39	chr2	protein_coding	calcium binding protein 39
ENSG00000235370.6	0	0.02	0	0.01	0.01	0.13	DNM1P51	chr15	transcribed_unprocessed_pseudogene	dynamin 1 pseudogene 51
ENSG00000137875.4	0.02	0	0	0	0	0	BCL2L10	chr15	protein_coding	BCL2-like 10 (apoptosis facilitator)
ENSG00000144655.14	4.07	4.02	4.3	3.94	4.04	3.81	CSRNP1	chr3	protein_coding	cysteine-serine-rich nuclear protein 1
ENSG00000260235.1	0.05	0	0.05	0.1	0.05	0.2	CTD-2026K11.3	chr15	antisense	--
ENSG00000279838.1	0.04	0.15	0.08	0.1	0.15	0.19	RP4-635A23.6	chr1	TEC	--
ENSG00000274918.1	0.12	0.18	0.07	0.12	0.06	0.06	RP11-54G14.1	chr18	lincRNA	--
ENSG00000171311.12	60.2	51.53	59.91	55.77	56.06	46.21	EXOSC1	chr10	protein_coding	exosome component 1
ENSG00000156990.14	22.83	20.31	23.72	26.43	23.67	22.15	RPUSD3	chr3	protein_coding	RNA pseudouridylate synthase domain containing 3
ENSG00000238578.1	6.32	6.69	6.64	6.09	4.89	5.93	SNORD4A	chr17	snoRNA	small nucleolar RNA, C/D box 4A
ENSG00000255343.1	4.83	3.98	4.73	5.55	5.06	6.57	RP11-299M14.2	chr8	3prime_overlapping_ncrna	--
ENSG00000109667.11	8.23	9	8.91	5.85	5.33	5.07	SLC2A9	chr4	protein_coding	solute carrier family 2 (facilitated glucose transporter), member 9
ENSG00000159197.3	0	0	0	0	0.05	0	KCNE2	chr21	protein_coding	potassium channel, voltage gated subfamily E regulatory beta subunit 2
ENSG00000271443.1	0	0	0	0	0	0.03	RP11-541E12.1	chr2	transcribed_processed_pseudogene	--
ENSG00000242299.1	4.08	2.63	6.12	3.82	5.14	2.85	RP11-234A1.1	chr3	processed_pseudogene	--
ENSG00000259556.2	0.13	0.1	0.29	0.24	0.13	0.22	RP11-56B16.2	chr15	unprocessed_pseudogene	--
ENSG00000253227.1	0	0.05	0	0	0	0.1	RP11-383J24.1	chr8	lincRNA	--
ENSG00000207922.1	0	0.57	0	0.29	0	0	MIR566	chr3	miRNA	microRNA 566
ENSG00000103495.13	95.75	100.66	96.3	117.88	112.85	108.36	MAZ	chr16	protein_coding	MYC-associated zinc finger protein (purine-binding transcription factor)
ENSG00000163714.17	10.76	9.99	10.04	11.94	12.29	9.11	U2SURP	chr3	protein_coding	U2 snRNP-associated SURP domain containing
ENSG00000100314.3	0.02	0.01	0	0	0.01	0	CABP7	chr22	protein_coding	calcium binding protein 7
ENSG00000253085.1	0	0.21	0	0	0	0	SCARNA11	chr1	scaRNA	small Cajal body-specific RNA 11
ENSG00000112759.16	26.51	26.87	28.89	28.36	29.94	24.91	SLC29A1	chr6	protein_coding	solute carrier family 29 (equilibrative nucleoside transporter), member 1
ENSG00000180346.3	2.28	2.11	2.23	2.79	2.5	2.02	TIGD2	chr4	protein_coding	tigger transposable element derived 2
ENSG00000237751.2	0	0	0.05	0	0	0	LINC01143	chr2	lincRNA	long intergenic non-protein coding RNA 1143
ENSG00000068697.6	189.42	156.51	186.86	165.15	167.5	118.54	LAPTM4A	chr2	protein_coding	lysosomal protein transmembrane 4 alpha
ENSG00000154764.5	0	0.01	0	0	0	0.01	WNT7A	chr3	protein_coding	wingless-type MMTV integration site family, member 7A
ENSG00000281041.2	0	0.02	0	0.02	0	0	RP11-470E16.2	chr1	lincRNA	--
ENSG00000139168.7	20.18	15.73	17.78	24.14	23.25	18.66	ZCRB1	chr12	protein_coding	zinc finger CCHC-type and RNA binding motif 1
ENSG00000240463.1	0.73	0.85	1.02	0.81	0.86	1.03	RPS19P3	chr14	processed_pseudogene	ribosomal protein S19 pseudogene 3
ENSG00000270540.1	0.07	0.14	0.06	0.11	0.05	0.06	RP11-785G17.1	chr2	antisense	--
ENSG00000197696.9	30.08	25.39	34.28	23.59	21.38	19.88	NMB	chr15	protein_coding	neuromedin B
ENSG00000186367.6	0	0.01	0	0	0.02	0.04	KIAA1024L	chr5	protein_coding	KIAA1024-like
ENSG00000281531.1	0.18	0.54	0.2	0.18	0.18	0.38	Metazoa_SRP	chr10	misc_RNA	--
ENSG00000277329.1	0	0	0	0	0.31	0	AC091114.1	chr8	miRNA	--
ENSG00000176236.6	0.25	0.16	0.26	0.21	0.13	0.25	C10orf111	chr10	antisense	chromosome 10 open reading frame 111
ENSG00000203797.9	0.57	1.03	0.98	1.21	1.17	1.04	DDO	chr6	protein_coding	D-aspartate oxidase
ENSG00000278022.1	0.29	0.23	0.13	0	0.06	0	RP11-35O15.2	chr15	sense_intronic	--
ENSG00000072135.12	10.82	12.67	11.1	11.78	11.43	11.83	PTPN18	chr2	protein_coding	protein tyrosine phosphatase, non-receptor type 18 (brain-derived)
ENSG00000112984.11	20.37	19.27	18.75	21.19	19.4	15.99	KIF20A	chr5	protein_coding	kinesin family member 20A
ENSG00000262292.2	0.13	0.18	0.02	0.18	0.13	0.21	RP11-160E2.11	chr17	lincRNA	--
ENSG00000270780.1	0	0	0.05	0	0	0	RP4-590F24.1	chr1	processed_pseudogene	--
ENSG00000115386.5	0.03	0	0	0	0	0	REG1A	chr2	protein_coding	regenerating islet-derived 1 alpha
ENSG00000187790.10	0.72	0.63	0.7	0.79	0.75	0.63	FANCM	chr14	protein_coding	Fanconi anemia, complementation group M
ENSG00000270964.1	0.35	0.24	0.37	0.86	0.78	0.59	RP11-502I4.3	chr15	lincRNA	--
ENSG00000235672.1	0	0.09	0	0	0	0.05	AC090286.2	chr17	transcribed_processed_pseudogene	--
ENSG00000243175.1	0	0	0.02	0.04	0.04	0.05	RP11-58H15.1	chr4	transcribed_processed_pseudogene	--
ENSG00000244144.1	0	0	0	0.11	0	0	RP11-757F18.3	chr3	processed_pseudogene	--
ENSG00000106608.16	3.36	4.04	3.84	5.42	5.5	7.35	URGCP	chr7	protein_coding	upregulator of cell proliferation
ENSG00000198663.16	5.71	5.88	6.23	5.17	5.26	5.8	C6orf89	chr6	protein_coding	chromosome 6 open reading frame 89
ENSG00000276751.1	0	0	0	0.25	0	0	AC011498.1	chr19	miRNA	--
ENSG00000121101.15	0.01	0.01	0.01	0.01	0	0.01	TEX14	chr17	protein_coding	testis expressed 14
ENSG00000101945.16	6.71	6.75	6.45	6.18	6.32	5.34	SUV39H1	chrX	protein_coding	suppressor of variegation 3-9 homolog 1 (Drosophila)
ENSG00000181220.15	2.13	2.34	2.07	2.01	2.01	2.31	ZNF746	chr7	protein_coding	zinc finger protein 746
ENSG00000184454.6	1.74	1.73	1.78	1.29	1.13	1.22	NCMAP	chr1	protein_coding	noncompact myelin associated protein
ENSG00000160113.5	48.57	49.66	53.85	45.97	43.51	38.82	NR2F6	chr19	protein_coding	nuclear receptor subfamily 2, group F, member 6
ENSG00000254860.5	0.36	0.25	0.34	0.39	0.41	0.7	TMEM9B-AS1	chr11	antisense	TMEM9B antisense RNA 1
ENSG00000140104.13	0.32	0.51	0.47	0.74	0.7	0.83	C14orf79	chr14	protein_coding	chromosome 14 open reading frame 79
ENSG00000183476.12	0	0	0	0	0.04	0	SH2D7	chr15	protein_coding	SH2 domain containing 7
ENSG00000227297.1	0	0.03	0	0	0	0	RP4-718J7.4	chr20	lincRNA	--
ENSG00000258555.4	1.8	1.74	1.91	1.95	1.7	1.62	SPECC1L-ADORA2A	chr22	protein_coding	SPECC1L-ADORA2A readthrough (NMD candidate)
ENSG00000119574.12	2.96	2.78	2.72	3.23	3.29	3.57	ZBTB45	chr19	protein_coding	zinc finger and BTB domain containing 45
ENSG00000248050.1	0	0	0	0	0.01	0.01	RP11-422N16.3	chr8	antisense	--
ENSG00000162520.14	3.9	3.02	4.29	3.56	3.43	3.02	SYNC	chr1	protein_coding	syncoilin, intermediate filament protein
ENSG00000050165.17	0.03	0.01	0.01	0.01	0.02	0	DKK3	chr11	protein_coding	dickkopf WNT signaling pathway inhibitor 3
ENSG00000198826.10	6.23	6.85	6.15	5.97	5.43	6.75	ARHGAP11A	chr15	protein_coding	Rho GTPase activating protein 11A
ENSG00000066230.10	0.07	0.16	0.07	0.22	0.19	0.37	SLC9A3	chr5	protein_coding	solute carrier family 9, subfamily A (NHE3, cation proton antiporter 3), member 3
ENSG00000086827.8	5.24	4.37	4.15	7.55	7.56	5.27	ZW10	chr11	protein_coding	zw10 kinetochore protein
ENSG00000198556.13	2.88	3.69	2.79	3.16	3.41	4.11	ZNF789	chr7	protein_coding	zinc finger protein 789
ENSG00000145545.11	1.07	1.08	1.1	1.41	1.44	1.34	SRD5A1	chr5	protein_coding	steroid-5-alpha-reductase, alpha polypeptide 1 (3-oxo-5 alpha-steroid delta 4-dehydrogenase alpha 1)
ENSG00000267049.1	0	0.06	0.07	0	0	0	AC002398.13	chr19	antisense	--
ENSG00000279591.1	0.22	1.1	0.37	0.11	0.28	0.29	AC002044.1	chr16	TEC	--
ENSG00000165832.5	7.97	7.17	7.66	8.27	8.7	6.19	TRUB1	chr10	protein_coding	TruB pseudouridine (psi) synthase family member 1
ENSG00000178607.15	0.91	1.02	0.85	0.8	0.82	1	ERN1	chr17	protein_coding	endoplasmic reticulum to nucleus signaling 1
ENSG00000280614.1	0	0	0	0	0	0.06	CH507-513H4.4	chr21	lincRNA	--
ENSG00000175344.16	0.09	0.12	0.12	0.09	0.08	0.1	CHRNA7	chr15	protein_coding	cholinergic receptor, nicotinic, alpha 7 (neuronal)
ENSG00000153993.13	0	0	0	0	0.01	0	SEMA3D	chr7	protein_coding	sema domain, immunoglobulin domain (Ig), short basic domain, secreted, (semaphorin) 3D
ENSG00000017260.19	6.52	6.81	7.09	6.84	7.41	5.77	ATP2C1	chr3	protein_coding	ATPase, Ca++ transporting, type 2C, member 1
ENSG00000231294.1	0	0	0	0.05	0	0	AC006994.2	chr2	antisense	--
ENSG00000054611.13	11.6	11	12.24	10.89	10.93	10.83	TBC1D22A	chr22	protein_coding	TBC1 domain family, member 22A
ENSG00000151553.14	2.83	3.31	3.01	1.95	2.08	1.61	FAM160B1	chr10	protein_coding	family with sequence similarity 160, member B1
ENSG00000233522.1	0	0	0	0	0	0.03	FAM224A	chrY	lincRNA	family with sequence similarity 224, member A (non-protein coding)
ENSG00000238113.6	0.53	0.56	0.68	0.9	1.04	0.59	LINC01410	chr9	lincRNA	long intergenic non-protein coding RNA 1410
ENSG00000127578.6	0.2	0.2	0.27	0.28	0.36	0.24	WFIKKN1	chr16	protein_coding	WAP, follistatin/kazal, immunoglobulin, kunitz and netrin domain containing 1
ENSG00000273056.1	0.14	0.14	0.1	0.19	0.09	0	RP11-77E14.2	chr9	lincRNA	--
ENSG00000134874.17	1.34	1.5	1.23	1.8	2.11	1.96	DZIP1	chr13	protein_coding	DAZ interacting zinc finger protein 1
ENSG00000137492.7	7.24	6.87	6.37	9.48	9.39	6.4	PRKRIR	chr11	protein_coding	protein-kinase, interferon-inducible double stranded RNA dependent inhibitor, repressor of (P58 repressor)
ENSG00000142065.13	0.54	0.52	0.47	0.39	0.48	0.4	ZFP14	chr19	protein_coding	ZFP14 zinc finger protein
ENSG00000168903.8	0	0	0	0	0	0.01	BTNL3	chr5	protein_coding	butyrophilin-like 3
ENSG00000037749.11	1.17	0.86	1.19	0.56	0.72	0.74	MFAP3	chr5	protein_coding	microfibrillar-associated protein 3
ENSG00000270531.1	0	0.1	0	0	0	0	RP11-169K17.2	chr3	processed_pseudogene	--
ENSG00000273619.1	6.45	6.01	5.64	9.39	10.27	9.46	RP5-908M14.9	chr20	antisense	--
ENSG00000228110.4	0	0	0	0.02	0	0	ST13P19	chr1	processed_pseudogene	suppression of tumorigenicity 13 (colon carcinoma) (Hsp70 interacting protein) pseudogene 19
ENSG00000115226.9	14.46	13.15	17.12	16.17	16.59	12.95	FNDC4	chr2	protein_coding	fibronectin type III domain containing 4
ENSG00000100804.18	316.55	270.03	328.65	298.98	288.32	241.12	PSMB5	chr14	protein_coding	proteasome (prosome, macropain) subunit, beta type, 5
ENSG00000128872.9	0.01	0.01	0.01	0.01	0.02	0.03	TMOD2	chr15	protein_coding	tropomodulin 2 (neuronal)
ENSG00000198954.6	13.09	12.64	13.35	14.63	15.97	11.99	KIF1BP	chr10	protein_coding	KIF1 binding protein
ENSG00000184831.13	16.81	13.03	15.4	15.27	14.5	12.04	APOO	chrX	protein_coding	apolipoprotein O
ENSG00000101000.4	1.57	1.67	1.62	1.14	1.25	1.01	PROCR	chr20	protein_coding	protein C receptor, endothelial
ENSG00000261734.1	0	0	0	0.01	0	0	RP11-669C19.1	chr3	lincRNA	--
ENSG00000213513.3	0.09	0.33	0.06	0.12	0.16	0.5	RP13-39P12.2	chr10	processed_pseudogene	--
ENSG00000139985.6	0.01	0.04	0.07	0.06	0.03	0.02	ADAM21	chr14	protein_coding	ADAM metallopeptidase domain 21
ENSG00000201413.1	0	0	0	0	0.23	0	RNA5SP141	chr3	rRNA	RNA, 5S ribosomal pseudogene 141
ENSG00000230910.2	0	0	0	0	0.01	0.01	RP3-525N10.2	chr6	antisense	--
ENSG00000144596.11	0	0.02	0.02	0	0.03	0.02	GRIP2	chr3	protein_coding	glutamate receptor interacting protein 2
ENSG00000271778.1	0.09	0.14	0.05	0.05	0.09	0.05	RP11-379F4.8	chr3	sense_intronic	--
ENSG00000163701.18	5.81	6.26	6.69	5.23	6.05	6.95	IL17RE	chr3	protein_coding	interleukin 17 receptor E
ENSG00000180822.11	3.55	3.56	3.56	4.87	4.63	5.02	PSMG4	chr6	protein_coding	proteasome (prosome, macropain) assembly chaperone 4
ENSG00000198722.12	4.01	3.95	3.6	5.01	4.79	6.09	UNC13B	chr9	protein_coding	unc-13 homolog B (C. elegans)
ENSG00000123643.12	2.17	2.29	2.32	1.35	1.72	1.66	SLC36A1	chr5	protein_coding	solute carrier family 36 (proton/amino acid symporter), member 1
ENSG00000173264.13	7.15	6.64	7.96	7.42	8.08	7.23	GPR137	chr11	protein_coding	G protein-coupled receptor 137
ENSG00000134490.13	3.73	3.71	3.55	3.29	3.38	2.97	TMEM241	chr18	protein_coding	transmembrane protein 241
ENSG00000206975.1	0.5	0	0	0	0	0	RNU6-13P	chr8	snRNA	RNA, U6 small nuclear 13, pseudogene
ENSG00000226699.1	0.15	0.29	0	0	0	1.08	RP11-122K13.7	chr10	antisense	--
ENSG00000064607.16	5.29	6.11	5.52	5.3	5.89	10.33	SUGP2	chr19	protein_coding	SURP and G patch domain containing 2
ENSG00000231073.1	0.51	0.15	0.41	0.3	0.15	0.15	RP11-316M1.3	chr1	antisense	--
ENSG00000165457.13	0.1	0.06	0.11	0.1	0.19	0.09	FOLR2	chr11	protein_coding	folate receptor 2 (fetal)
ENSG00000109066.13	5.67	6.34	6.35	6.18	6.17	7.4	TMEM104	chr17	protein_coding	transmembrane protein 104
ENSG00000280006.1	0.7	1.12	0.24	0.29	0.85	4.26	AC009060.2	chr16	protein_coding	--
ENSG00000171735.18	5.16	4.75	5.28	5.07	5.72	4.54	CAMTA1	chr1	protein_coding	calmodulin binding transcription activator 1
ENSG00000166685.11	7.56	7.45	7.36	8.76	8.89	7.26	COG1	chr17	protein_coding	component of oligomeric golgi complex 1
ENSG00000085552.16	0.04	0.01	0.01	0.01	0.02	0.05	IGSF9	chr1	protein_coding	immunoglobulin superfamily, member 9
ENSG00000129437.9	0.02	0	0.05	0.07	0.02	0.02	KLK14	chr19	protein_coding	kallikrein-related peptidase 14
ENSG00000152207.7	0	0.01	0.01	0	0.01	0.01	CYSLTR2	chr13	protein_coding	cysteinyl leukotriene receptor 2
ENSG00000231887.6	1.85	1.74	1.29	1.36	1.17	1.82	PRH1	chr12	protein_coding	proline-rich protein HaeIII subfamily 1
ENSG00000140398.13	0.84	0.88	0.9	0.77	0.83	1.12	NEIL1	chr15	protein_coding	nei endonuclease VIII-like 1 (E. coli)
ENSG00000281406.1	0.56	0.7	0.54	1.13	1.06	0.82	BLACAT1	chr1	lincRNA	bladder cancer associated transcript 1 (non-protein coding)
ENSG00000030066.13	6.5	6.17	5.94	6.35	6.31	5.18	NUP160	chr11	protein_coding	nucleoporin 160kDa
ENSG00000146453.12	0.03	0.01	0.02	0	0.01	0.01	PNLDC1	chr6	protein_coding	poly(A)-specific ribonuclease (PARN)-like domain containing 1
ENSG00000170340.10	5.44	5.23	5.88	4.01	3.8	3	B3GNT2	chr2	protein_coding	UDP-GlcNAc:betaGal beta-1,3-N-acetylglucosaminyltransferase 2
ENSG00000156671.12	3.17	3.25	2.9	2.79	2.74	2.53	SAMD8	chr10	protein_coding	sterile alpha motif domain containing 8
ENSG00000196376.10	0.01	0.01	0	0	0.01	0.03	SLC35F1	chr6	protein_coding	solute carrier family 35, member F1
ENSG00000135052.16	0.38	0.4	0.39	1.27	1.36	1.55	GOLM1	chr9	protein_coding	golgi membrane protein 1
ENSG00000260955.2	0.3	0.43	0.27	0.12	0.37	0.84	RP11-30L15.6	chr8	lincRNA	--
ENSG00000254219.1	0.05	0	0	0	0	0	GS1-251I9.2	chr8	processed_transcript	--
ENSG00000176390.11	2.75	2.85	2.83	3.02	2.91	2.61	CRLF3	chr17	protein_coding	cytokine receptor-like factor 3
ENSG00000100058.12	5.47	5.51	5	5.67	5.29	5.2	CRYBB2P1	chr22	transcribed_unprocessed_pseudogene	crystallin, beta B2 pseudogene 1
ENSG00000139921.12	10.53	9.18	10.1	7.43	7.21	5.8	TMX1	chr14	protein_coding	thioredoxin-related transmembrane protein 1
ENSG00000136867.10	3.77	3.44	3.8	3.47	3.1	3.04	SLC31A2	chr9	protein_coding	solute carrier family 31 (copper transporter), member 2
ENSG00000185345.18	0.01	0.02	0.04	0.01	0.02	0.03	PARK2	chr6	protein_coding	parkin RBR E3 ubiquitin protein ligase
ENSG00000265144.1	0	0	0	0	0	0.38	MIR548AM	chrX	miRNA	microRNA 548am
ENSG00000266509.1	0	0	0	0	0	0.27	MIR3934	chr6	miRNA	microRNA 3934
ENSG00000100263.13	6.08	6.66	6.6	7.24	8.48	7.12	RHBDD3	chr22	protein_coding	rhomboid domain containing 3
ENSG00000250264.1	5.46	5.56	6.61	6.87	6.71	9.88	XXbac-BPG246D15.9	chr6	protein_coding	--
ENSG00000206337.10	1.35	1.26	1.36	1.34	1.49	1.06	HCP5	chr6	sense_overlapping	HLA complex P5 (non-protein coding)
ENSG00000205865.4	0.1	0.05	0.11	0.08	0.03	0.13	FAM99B	chr11	antisense	family with sequence similarity 99, member B (non-protein coding)
ENSG00000272779.1	5.78	5.11	5.09	7.97	7.45	6.62	LL22NC03-80A10.6	chr22	transcribed_unprocessed_pseudogene	--
ENSG00000103550.13	8.09	7.95	7.26	8.41	8.67	12.09	KNOP1	chr16	protein_coding	lysine-rich nucleolar protein 1
ENSG00000185272.13	0.22	0.19	0.17	0.07	0.17	0.03	RBM11	chr21	protein_coding	RNA binding motif protein 11
ENSG00000238273.3	0	0	0.06	0	0.01	0.02	AC012360.6	chr2	antisense	--
ENSG00000276900.1	0.78	0.76	0.89	1.25	1.35	1.31	RP11-467L13.7	chr12	antisense	--
ENSG00000269376.1	0.08	0.17	0.28	0.42	0.46	0.26	RP11-120K24.5	chr13	sense_intronic	--
ENSG00000154639.18	10.38	9.72	10.07	7.9	7.64	6.98	CXADR	chr21	protein_coding	coxsackie virus and adenovirus receptor
ENSG00000221986.6	0.59	0.35	0.57	0.58	0.32	0.58	MYBPHL	chr1	protein_coding	myosin binding protein H-like
ENSG00000213279.2	0	0.01	0.03	0.02	0.01	0.05	RP1-29C18.9	chr22	lincRNA	--
ENSG00000243312.3	0	0	0	0	0.03	0	RP11-397E7.1	chr4	processed_pseudogene	--
ENSG00000242951.1	0	0.07	0	0	0	0	RP11-507E23.1	chr14	processed_pseudogene	--
ENSG00000264080.1	0	0	0	0.05	0	0	CTD-2015H3.1	chr18	lincRNA	--
ENSG00000232307.1	0	0	0	0	0	0.01	DAOA-AS1	chr13	antisense	DAOA antisense RNA 1
ENSG00000197757.7	0.01	0.02	0.01	0.05	0.03	0.05	HOXC6	chr12	protein_coding	homeobox C6
ENSG00000112592.12	11.35	11.39	11.21	11.64	12.34	11.67	TBP	chr6	protein_coding	TATA box binding protein
ENSG00000120907.17	0	0	0.02	0	0	0.01	ADRA1A	chr8	protein_coding	adrenoceptor alpha 1A
ENSG00000260836.1	0.03	0	0.03	0	0.12	0	RP11-152F13.10	chr15	protein_coding	--
ENSG00000256588.1	0	0	0	0	0.04	0.05	RP11-613F22.8	chr11	sense_intronic	--
ENSG00000259712.1	0	0	0	0	0	0.04	CTD-2184D3.5	chr15	antisense	--
ENSG00000042062.11	0.14	0.09	0.09	0.01	0.08	0.1	FAM65C	chr20	protein_coding	family with sequence similarity 65, member C
ENSG00000166387.11	3.54	3.54	3.96	3.56	3.28	3.7	PPFIBP2	chr11	protein_coding	PTPRF interacting protein, binding protein 2 (liprin beta 2)
ENSG00000205334.2	0.06	0.12	0.11	0.19	0.19	0.27	LINC01460	chr2	lincRNA	long intergenic non-protein coding RNA 1460
ENSG00000140694.16	18.6	18.72	20.04	22.55	23.21	17.37	PARN	chr16	protein_coding	poly(A)-specific ribonuclease
ENSG00000214465.3	0.02	0	0.1	0.05	0.11	0.05	SMARCE1P6	chr2	processed_pseudogene	SWI/SNF related, matrix associated, actin dependent regulator of chromatin, subfamily e, member 1 pseudogene 6
ENSG00000125656.8	38.94	35.21	41.41	38.11	38.06	31.58	CLPP	chr19	protein_coding	caseinolytic mitochondrial matrix peptidase proteolytic subunit
ENSG00000274444.1	0.54	0.27	0.08	0.21	0.54	0.36	RP11-128A17.2	chr15	lincRNA	--
ENSG00000108384.14	18.04	15.7	17.3	19.35	18.77	15.01	RAD51C	chr17	protein_coding	RAD51 paralog C
ENSG00000260774.1	0.07	0.08	0.16	0.13	0.12	0.42	CTD-2083E4.4	chr5	processed_transcript	--
ENSG00000131931.8	3.25	2.94	2.88	3.66	3.69	2.65	THAP1	chr8	protein_coding	THAP domain containing, apoptosis associated protein 1
ENSG00000257222.1	0	0	0	0	0.07	0.08	RP11-554E23.4	chr12	antisense	--
ENSG00000208036.1	0	0	0	0	0	0.35	MIR106B	chr7	miRNA	microRNA 106b
ENSG00000137571.10	0.04	0.02	0.04	0.04	0.06	0.06	SLCO5A1	chr8	protein_coding	solute carrier organic anion transporter family, member 5A1
ENSG00000222266.1	0	0	0	0	0	0.57	RNU6-757P	chr5	snRNA	RNA, U6 small nuclear 757, pseudogene
ENSG00000198673.10	0.02	0.02	0.03	0.01	0.02	0.03	FAM19A2	chr12	protein_coding	family with sequence similarity 19 (chemokine (C-C motif)-like), member A2
ENSG00000204438.10	4.59	4.11	4.89	5.68	5.02	5.29	GPANK1	chr6	protein_coding	G patch domain and ankyrin repeats 1
ENSG00000134709.10	4.28	3.85	4.21	3.45	3.82	3.16	HOOK1	chr1	protein_coding	hook microtubule-tethering protein 1
ENSG00000143458.11	0.04	0.04	0.03	0.03	0.03	0.08	GABPB2	chr1	protein_coding	GA binding protein transcription factor, beta subunit 2
ENSG00000179611.3	0.01	0	0	0	0.01	0.02	DGKZP1	chr13	processed_pseudogene	diacylglycerol kinase, zeta pseudogene 1
ENSG00000198198.13	1.02	1.26	1.09	1.24	1.4	6.31	SZT2	chr1	protein_coding	seizure threshold 2 homolog (mouse)
ENSG00000270720.1	0.59	0.64	0.66	0.42	0.32	0.44	RP11-84C13.2	chr4	lincRNA	--
ENSG00000263969.2	0	0	0.1	0	0	0.1	RN7SL678P	chr21	misc_RNA	RNA, 7SL, cytoplasmic 678, pseudogene
ENSG00000186310.9	0.04	0.04	0.06	0.03	0.03	0.03	NAP1L3	chrX	protein_coding	nucleosome assembly protein 1-like 3
ENSG00000278588.1	0	0	0.16	0.14	0	0	HIST1H2BI	chr6	protein_coding	histone cluster 1, H2bi
ENSG00000279189.1	0	0	0	0	0	0.01	RP11-861E23.2	chr11	TEC	--
ENSG00000255320.1	0.07	0.07	0.08	0	0.07	0.07	RP11-755F10.1	chr11	antisense	--
ENSG00000163877.9	4.96	4.69	4.93	4.35	4.98	4.41	SNIP1	chr1	protein_coding	Smad nuclear interacting protein 1
ENSG00000121578.12	2.61	2.75	2.65	2.84	2.86	2.12	B4GALT4	chr3	protein_coding	UDP-Gal:betaGlcNAc beta 1,4- galactosyltransferase, polypeptide 4
ENSG00000139112.10	7.07	6.58	7.11	5.12	5.56	4.34	GABARAPL1	chr12	protein_coding	GABA(A) receptor-associated protein like 1
ENSG00000063180.8	0.07	0.13	0.23	0.1	0.09	0.15	CA11	chr19	protein_coding	carbonic anhydrase XI
ENSG00000261764.1	0	0	0	0	0	0.02	KRT18P18	chr16	transcribed_processed_pseudogene	keratin 18 pseudogene 18
ENSG00000204424.9	0	0	0.03	0	0	0	LY6G6F	chr6	protein_coding	lymphocyte antigen 6 complex, locus G6F
ENSG00000261135.1	1.3	1.74	1.21	1.68	1.95	1.92	RP4-798A10.7	chr1	lincRNA	--
ENSG00000235631.1	0.31	0.23	0.25	0.04	0.1	0.13	RNF148	chr7	protein_coding	ring finger protein 148
ENSG00000100418.7	11.41	10.6	11.14	12.66	12.83	11.1	DESI1	chr22	protein_coding	desumoylating isopeptidase 1
ENSG00000179709.8	0.02	0.03	0.02	0.01	0.03	0.04	NLRP8	chr19	protein_coding	NLR family, pyrin domain containing 8
ENSG00000165507.8	10.84	11.14	10.05	3.42	2.8	2.87	C10orf10	chr10	protein_coding	chromosome 10 open reading frame 10
ENSG00000239672.7	188.43	157.85	181.25	188.38	183.03	145.82	NME1	chr17	protein_coding	NME/NM23 nucleoside diphosphate kinase 1
ENSG00000271430.1	1.01	1.6	1.31	0.96	0.86	1.11	RP3-368A4.5	chrX	sense_intronic	--
ENSG00000146374.13	0	0	0.01	0	0.01	0	RSPO3	chr6	protein_coding	R-spondin 3
ENSG00000143756.11	3.62	3.5	4.01	4.24	4.52	3.46	FBXO28	chr1	protein_coding	F-box protein 28
ENSG00000277075.1	2.04	1.84	1.83	2.37	2.97	5.65	HIST1H2AE	chr6	protein_coding	histone cluster 1, H2ae
ENSG00000273328.5	0	0.01	0.02	0	0.02	0.02	RP11-141M3.6	chr3	processed_transcript	--
ENSG00000103326.10	8.7	11.31	10.11	11.57	11.34	15.36	CAPN15	chr16	protein_coding	calpain 15
ENSG00000280064.1	0.02	0.02	0.09	0.02	0.01	0.01	RP11-205M5.3	chr8	TEC	--
ENSG00000256222.2	0	0	0	0.02	0	0	MTRNR2L3	chr20	protein_coding	MT-RNR2-like 3
ENSG00000236869.1	0	0.06	0	0	0	0	RP11-944L7.4	chr3	antisense	--
ENSG00000237463.5	0	0.01	0	0	0	0	RP11-280O1.2	chr1	antisense	--
ENSG00000005059.15	1.02	0.87	1.3	1.37	1.51	1.27	CCDC109B	chr4	protein_coding	coiled-coil domain containing 109B
ENSG00000278862.1	0.02	0.01	0.02	0.02	0.01	0.12	RP11-571O6.2	chr16	TEC	--
ENSG00000114316.12	3.33	3.27	3.21	3.32	3.56	3.46	USP4	chr3	protein_coding	ubiquitin specific peptidase 4 (proto-oncogene)
ENSG00000249207.1	0	0.03	0	0	0	0	RP11-360F5.1	chr4	antisense	--
ENSG00000267102.1	0	0	0	0	0.04	0	RP11-686D22.7	chr17	transcribed_processed_pseudogene	--
ENSG00000138678.10	8.07	7.6	8.03	5.73	5.47	4.38	AGPAT9	chr4	protein_coding	1-acylglycerol-3-phosphate O-acyltransferase 9
ENSG00000061676.14	4.92	4.75	4.94	5.72	5.92	4.81	NCKAP1	chr2	protein_coding	NCK-associated protein 1
ENSG00000124193.14	45.77	46.73	46	44.72	44.71	36.81	SRSF6	chr20	protein_coding	serine/arginine-rich splicing factor 6
ENSG00000160789.19	88.3	89.11	101.44	105.11	108.27	134.02	LMNA	chr1	protein_coding	lamin A/C
ENSG00000266252.1	0.27	0.27	0	0	0	0	AL031768.1	chr6	miRNA	--
ENSG00000104774.12	11	11.13	11.8	11.83	12.15	15.91	MAN2B1	chr19	protein_coding	mannosidase, alpha, class 2B, member 1
ENSG00000197746.13	294.19	282.13	324.02	281.93	292.47	250.48	PSAP	chr10	protein_coding	prosaposin
ENSG00000248840.2	0.05	0.05	0.05	0.1	0.05	0.68	RP11-357G3.2	chr4	transcribed_processed_pseudogene	--
ENSG00000236255.1	0.65	1.1	0.91	0.63	0.6	0.81	AC009404.2	chr2	lincRNA	--
ENSG00000254568.1	0	0	0	0	0	0.08	RP11-664I21.5	chr11	antisense	--
ENSG00000253054.1	0	0.45	0	0.46	0	0	RNU7-77P	chr10	snRNA	RNA, U7 small nuclear 77 pseudogene
ENSG00000070729.13	0.04	0.03	0.05	0.02	0.03	0.06	CNGB1	chr16	protein_coding	cyclic nucleotide gated channel beta 1
ENSG00000242516.1	0	0	0	0	0	0.01	LINC00960	chr3	lincRNA	long intergenic non-protein coding RNA 960
ENSG00000212126.3	0	0	0	0.03	0.03	0.03	TAS2R50	chr12	protein_coding	taste receptor, type 2, member 50
ENSG00000165698.15	0.21	0.28	0.52	0.47	0.47	0.31	C9orf9	chr9	protein_coding	chromosome 9 open reading frame 9
ENSG00000177575.12	0	0	0.01	0.01	0.02	0	CD163	chr12	protein_coding	CD163 molecule
ENSG00000177108.5	0	0.01	0	0	0	0.02	ZDHHC22	chr14	protein_coding	zinc finger, DHHC-type containing 22
ENSG00000102387.15	0	0	0	0.01	0.01	0	TAF7L	chrX	protein_coding	TAF7-like RNA polymerase II, TATA box binding protein (TBP)-associated factor, 50kDa
ENSG00000251031.1	0	0.05	0.06	0.11	0	0	CTC-367F4.1	chr5	lincRNA	--
ENSG00000167110.16	6.19	6.26	6.32	8.22	7.66	14.56	GOLGA2	chr9	protein_coding	golgin A2
ENSG00000177679.15	0.2	0.21	0.14	0.15	0.14	0.17	SRRM3	chr7	protein_coding	serine/arginine repetitive matrix 3
ENSG00000275759.1	0.27	0.41	0.25	0.37	0.23	0.1	RP11-131L12.3	chr12	lincRNA	--
ENSG00000240366.1	0	0	0	0	0.09	0	RPL36AP45	chr15	processed_pseudogene	ribosomal protein L36a pseudogene 45
ENSG00000277246.1	0	0	0.07	0	0	0.07	RP11-153I24.4	chr13	sense_intronic	--
ENSG00000175595.14	1.12	1.05	1.11	1.21	1.16	1.22	ERCC4	chr16	protein_coding	excision repair cross-complementation group 4
ENSG00000153165.18	0.01	0	0	0.01	0.02	0	RGPD3	chr2	protein_coding	RANBP2-like and GRIP domain containing 3
ENSG00000145041.15	2.74	2.82	2.79	2.58	2.55	3.55	VPRBP	chr3	protein_coding	Vpr (HIV-1) binding protein
ENSG00000238287.1	1.59	2.3	2.32	2.31	1.61	2.21	RP11-656D10.3	chr1	antisense	--
ENSG00000279504.1	0.44	0.14	0.08	0.24	0.28	0.18	AD001527.4	chr19	TEC	--
ENSG00000250376.1	0.41	0.26	0.17	0.5	0.34	0.08	CTD-2005D20.1	chr4	unprocessed_pseudogene	--
ENSG00000139675.11	1.22	1.31	0.9	1.14	1.13	0.94	HNRNPA1L2	chr13	protein_coding	heterogeneous nuclear ribonucleoprotein A1-like 2
ENSG00000237877.6	0.28	0.41	0.27	0.26	0.32	0.33	LINC01473	chr2	lincRNA	long intergenic non-protein coding RNA 1473
ENSG00000083635.7	4.42	4.17	4.01	4.7	5.18	3.61	NUFIP1	chr13	protein_coding	nuclear fragile X mental retardation protein interacting protein 1
ENSG00000272948.2	0.19	0.15	0.21	0.31	0.27	0.52	AP001412.1	chr21	antisense	--
ENSG00000256546.1	2.55	2.12	1.81	2.2	1.94	2.66	AC156455.1	chr12	processed_transcript	--
ENSG00000188766.12	0.17	0.27	0.17	0.33	0.37	0.65	SPRED3	chr19	protein_coding	sprouty-related, EVH1 domain containing 3
ENSG00000150201.14	0.03	0.03	0	0.03	0	0.03	FXYD4	chr10	protein_coding	FXYD domain containing ion transport regulator 4
ENSG00000255835.1	10.27	10.1	12.36	11.43	12.11	10.28	RP4-559A3.7	chr1	protein_coding	--
ENSG00000164946.19	0.41	0.51	0.33	0.48	0.38	0.47	FREM1	chr9	protein_coding	FRAS1 related extracellular matrix 1
ENSG00000145495.14	5.45	5.86	5.6	5.99	6.07	5.33	2021-03-06	chr5	protein_coding	membrane-associated ring finger (C3HC4) 6, E3 ubiquitin protein ligase
ENSG00000076641.4	0	0.01	0.02	0.01	0.01	0	PAG1	chr8	protein_coding	phosphoprotein membrane anchor with glycosphingolipid microdomains 1
ENSG00000261522.5	0.03	0.01	0.01	0.01	0.03	0.04	RP11-407P15.1	chr2	transcribed_unprocessed_pseudogene	--
ENSG00000247516.4	1.32	1	1.1	1.12	1.05	0.92	MIR4458HG	chr5	lincRNA	MIR4458 host gene
ENSG00000175592.8	10.89	13.58	12.7	16.75	17.97	15.4	FOSL1	chr11	protein_coding	FOS-like antigen 1
ENSG00000236990.1	0	0	0	0.01	0.01	0.01	RP11-433J20.1	chr10	lincRNA	--
ENSG00000275657.1	0	0	0	0	0	0.45	MIR6758	chr12	miRNA	microRNA 6758
ENSG00000235808.1	0	0	0	0.06	0	0.07	MYL6P2	chr21	processed_pseudogene	myosin, light chain 6 pseudogene 2
ENSG00000156968.8	8.1	8.67	7.47	8.05	6.94	11.67	MPV17L	chr16	protein_coding	MPV17 mitochondrial membrane protein-like
ENSG00000157911.9	16.57	16.13	15.91	18.89	20.3	18.08	PEX10	chr1	protein_coding	peroxisomal biogenesis factor 10
ENSG00000169435.13	0.14	0.14	0.15	0.14	0.13	0.09	RASSF6	chr4	protein_coding	Ras association (RalGDS/AF-6) domain family member 6
ENSG00000276770.1	0	0	0	0	0	0.36	MIR6780B	chr6	miRNA	microRNA 6780b
ENSG00000168273.7	6.68	6.27	6.66	9.03	8.76	7.81	SMIM4	chr3	protein_coding	small integral membrane protein 4
ENSG00000167900.11	83.81	75.03	90.2	90.15	83.33	69.33	TK1	chr17	protein_coding	thymidine kinase 1, soluble
ENSG00000279296.1	0	0	0.02	0	0	0	RP11-609D21.3	chr17	TEC	--
ENSG00000241399.6	2.16	1.89	2.01	2.07	1.98	1.44	CD302	chr2	protein_coding	CD302 molecule
ENSG00000268916.5	0.27	0.1	0.08	0.14	0.31	0.43	CSAG3	chrX	transcribed_processed_pseudogene	CSAG family, member 3
ENSG00000262967.1	0.2	0.2	0.09	0.12	0.2	0.08	RP11-294J22.6	chr17	antisense	--
ENSG00000248905.8	0.01	0.01	0.01	0.02	0.04	0.04	FMN1	chr15	protein_coding	formin 1
ENSG00000115641.18	7.38	6	7.88	6.24	6.97	5.3	FHL2	chr2	protein_coding	four and a half LIM domains 2
ENSG00000174469.17	0.01	0.01	0.02	0	0.01	0.04	CNTNAP2	chr7	protein_coding	contactin associated protein-like 2
ENSG00000104880.17	0.5	0.71	0.61	0.61	0.49	1.04	ARHGEF18	chr19	protein_coding	Rho/Rac guanine nucleotide exchange factor (GEF) 18
ENSG00000246067.7	5.94	4.68	4.9	6.07	6.05	6.09	RAB30-AS1	chr11	lincRNA	RAB30 antisense RNA 1 (head to head)
ENSG00000124657.1	0.14	0.11	0.19	0.09	0.03	0.06	OR2B6	chr6	protein_coding	olfactory receptor, family 2, subfamily B, member 6
ENSG00000176248.8	13.16	13.57	15.04	13.17	12.39	16.64	ANAPC2	chr9	protein_coding	anaphase promoting complex subunit 2
ENSG00000225616.2	0	0.08	0	0	0	0	RP4-604A21.1	chr1	processed_pseudogene	--
ENSG00000103152.11	40.18	34.1	43.43	43.16	41.62	37.74	MPG	chr16	protein_coding	N-methylpurine-DNA glycosylase
ENSG00000126562.16	1.33	1.87	1.11	1.73	2.18	3.41	WNK4	chr17	protein_coding	WNK lysine deficient protein kinase 4
ENSG00000047662.4	0	0.01	0.03	0.02	0	0	FAM184B	chr4	protein_coding	family with sequence similarity 184, member B
ENSG00000282317.1	0	0.05	0.05	0	0	0	RP11-173A6.3	chr1	lincRNA	--
[truncated: 28,708 more rows]
