# Supplementary material for: PAIP1 regulates expression of immune and inflammatory response associated genes at transcript level in liver cancer cell
Source: PeerJ. 2023 Apr 21;11:e15070. doi: 10.7717/peerj.15070 (PMC10124545; doi:10.7717/peerj.15070)
Supplement: Supplemental Information 5 [file peerj-11-15070-s005.xlsx]

## Sheet: Table S5
Table S5. Human genes detected by different FPKM cut off.
Sample	Total human genes in annotation	Expressed genes (FPKM>0)(%)	Expressed genes (FPKM>=1)(%)
Ctrl_1st	60498	22836(37.75%)	11541(50.54%)
Ctrl_2nd		24022(39.71%)	11728(48.82%)
Ctrl_3rd		22968(37.96%)	11609(50.54%)
siPAIP1_1st		22839(37.75%)	11713(51.29%)
siPAIP1_2nd		23349(38.59%)	11829(50.66%)
siPAIP1_3rd		25348(41.90%)	12192(48.10%)
