# Supplementary material for: PAIP1 regulates expression of immune and inflammatory response associated genes at transcript level in liver cancer cell
Source: PeerJ. 2023 Apr 21;11:e15070. doi: 10.7717/peerj.15070 (PMC10124545; doi:10.7717/peerj.15070)
Supplement: Supplemental Information 6 [file peerj-11-15070-s006.xlsx]

## Sheet: Table S6
Table S6. Differential expression of genes between siPAIP1 and control.
Up or Down regulated	Gene	logFC	logCPM	PValue	FDR	Ctrl_1st	Ctrl_2nd	Ctrl_3rd	siPAIP1_1st	siPAIP1_2nd	siPAIP1_3rd	Symbol	Chr	GeneType	Description
down	ENSG00000137078.8	-1.35831	1.3511	7.8374e-09	1.10894e-06	2.12	2.32	2.84	0.74	1.25	0.92	SIT1	chr9	protein_coding	signaling threshold regulating transmembrane adaptor 1
down	ENSG00000213412.3	-1.36943	0.845452	6.92499e-08	7.50296e-06	4.01	3.39	4.64	1.12	2.08	1.57	HNRNPA1P33	chr10	processed_pseudogene	heterogeneous nuclear ribonucleoprotein A1 pseudogene 33
down	ENSG00000279686.1	-1.99194	-2.06184	0.00111692	0.0241185	0.21	0.27	0.3	0.05	0.08	0.06	ECSCR	chr5	protein_coding	endothelial cell surface expressed chemotaxis and apoptosis regulator
down	ENSG00000055957.10	-1.45321	0.0750901	8.01938e-07	6.12061e-05	0.38	0.55	0.27	0.11	0.18	0.17	ITIH1	chr3	protein_coding	inter-alpha-trypsin inhibitor heavy chain 1
down	ENSG00000272990.1	-1.00553	-0.0542192	0.000798155	0.0188653	1.9	2.48	2	1.19	1.07	1.01	RP11-305K5.1	chr3	antisense	--
down	ENSG00000088002.11	-3.07677	1.73052	5.29866e-34	2.34556e-30	2.95	2.72	3.6	0.48	0.32	0.32	SULT2B1	chr19	protein_coding	sulfotransferase family, cytosolic, 2B, member 1
down	ENSG00000234678.1	-1.25017	0.769955	1.08452e-06	8.03975e-05	2.04	1.69	2.14	0.65	0.84	1.05	RP11-465N4.4	chr1	antisense	--
down	ENSG00000146755.10	-1.47662	2.58945	2.61733e-12	8.19223e-10	3.27	3.59	4.08	1.42	1.5	1.12	TRIM50	chr7	protein_coding	tripartite motif containing 50
down	ENSG00000169894.17	-1.20542	-1.12638	0.00193789	0.0371363	0.04	0.05	0.04	0.01	0.03	0.02	MUC3A	chr7	protein_coding	mucin 3A, cell surface associated
down	ENSG00000021852.12	-1.62344	-0.365314	6.32084e-07	5.03506e-05	0.36	0.38	0.42	0.1	0.15	0.14	C8B	chr1	protein_coding	complement component 8, beta polypeptide
down	ENSG00000132840.9	-1.38509	5.49261	5.98382e-13	2.20739e-10	27.81	27.85	29.43	12.64	10.54	10.35	BHMT2	chr5	protein_coding	betaine--homocysteine S-methyltransferase 2
down	ENSG00000167914.10	-2.5769	-1.5274	4.46549e-07	3.77036e-05	0.16	0.24	0.22	0.04	0.03	0.04	GSDMA	chr17	protein_coding	gasdermin A
down	ENSG00000166558.10	-2.33315	-2.4065	0.00154151	0.0311793	0.18	0.1	0.16	0	0.02	0.07	SLC38A8	chr16	protein_coding	solute carrier family 38, member 8
down	ENSG00000130768.14	-1.5396	1.95164	5.78885e-12	1.70837e-09	1.95	2.38	2.36	0.7	0.73	0.94	SMPDL3B	chr1	protein_coding	sphingomyelin phosphodiesterase, acid-like 3B
down	ENSG00000111199.10	-1.17764	4.40294	1.35334e-09	2.30417e-07	7.07	7.52	9.22	3.49	3.78	3.55	TRPV4	chr12	protein_coding	transient receptor potential cation channel, subfamily V, member 4
down	ENSG00000279591.1	-1.34769	-1.03384	0.000812354	0.0191045	0.22	1.1	0.37	0.11	0.28	0.29	AC002044.1	chr16	TEC	--
down	ENSG00000235631.1	-1.52789	-1.66186	0.0025303	0.045117	0.31	0.23	0.25	0.04	0.1	0.13	RNF148	chr7	protein_coding	ring finger protein 148
down	ENSG00000165507.8	-1.85761	4.01899	2.39294e-20	2.966e-17	10.84	11.14	10.05	3.42	2.8	2.87	C10orf10	chr10	protein_coding	chromosome 10 open reading frame 10
down	ENSG00000269095.1	-2.13845	-1.97156	0.000211191	0.00674659	0.68	0.31	0.7	0.11	0.16	0.11	AC010646.3	chr19	protein_coding	--
down	ENSG00000225111.1	-1.19648	-0.647715	0.000514183	0.0135036	1.48	1.37	1.78	0.88	0.46	0.73	AC083900.1	chr2	sense_intronic	--
down	ENSG00000136881.11	-1.9207	2.31821	2.70871e-18	2.70758e-15	1.96	2.16	2.06	0.57	0.59	0.52	BAAT	chr9	protein_coding	bile acid CoA:amino acid N-acyltransferase
down	ENSG00000185532.14	-2.26892	-2.4467	0.00246413	0.0442387	0.01	0.03	0.04	0.01	0.01	0	PRKG1	chr10	protein_coding	protein kinase, cGMP-dependent, type I
down	ENSG00000147852.15	-1.11938	2.9506	4.04921e-08	4.82588e-06	1.08	0.94	1.06	0.52	0.53	0.41	VLDLR	chr9	protein_coding	very low density lipoprotein receptor
down	ENSG00000148344.10	-2.20373	-0.556508	6.94947e-10	1.35436e-07	0.57	0.38	0.61	0.17	0.09	0.08	PTGES	chr9	protein_coding	prostaglandin E synthase
down	ENSG00000105246.5	-1.49786	0.557338	1.77406e-08	2.33927e-06	1.38	1.24	2.14	0.42	0.8	0.5	EBI3	chr19	protein_coding	Epstein-Barr virus induced 3
down	ENSG00000273259.2	-1.04292	6.33112	3.8601e-08	4.61826e-06	62.98	56.91	62.91	35.12	31.63	24.8	SERPINA3	chr14	protein_coding	serpin peptidase inhibitor, clade A (alpha-1 antiproteinase, antitrypsin), member 3
down	ENSG00000255398.2	-1.73038	0.459058	3.0707e-10	6.47291e-08	0.83	0.83	0.9	0.35	0.25	0.19	HCAR3	chr12	protein_coding	hydroxycarboxylic acid receptor 3
down	ENSG00000248405.9	-1.21366	-0.752998	0.00074307	0.0178388	0.24	0.16	0.36	0.17	0.05	0.12	PRR5-ARHGAP8	chr22	protein_coding	PRR5-ARHGAP8 readthrough
down	ENSG00000152689.17	-2.41669	-0.885841	3.72728e-09	5.57784e-07	0.16	0.1	0.14	0.04	0.02	0.02	RASGRP3	chr2	protein_coding	RAS guanyl releasing protein 3 (calcium and DAG-regulated)
down	ENSG00000110944.8	-1.41913	-0.394527	1.43857e-05	0.000738032	0.77	0.95	0.91	0.31	0.31	0.38	IL23A	chr12	protein_coding	interleukin 23, alpha subunit p19
down	ENSG00000006606.8	-1.07488	0.0325204	0.00022215	0.00703142	1.71	1.14	2.16	0.85	0.84	0.73	CCL26	chr7	protein_coding	chemokine (C-C motif) ligand 26
down	ENSG00000196091.12	-2.33871	-2.19254	0.000424548	0.0116834	0.06	0.07	0.03	0.01	0.02	0.01	MYBPC1	chr12	protein_coding	myosin binding protein C, slow type
down	ENSG00000257345.2	-1.18666	3.32113	3.59851e-09	5.41296e-07	10.02	8.97	10.63	5.06	4.59	3.75	RP11-511B23.1	chr12	lincRNA	--
down	ENSG00000110887.7	-1.31167	1.12359	5.96881e-08	6.65307e-06	1.74	1.04	1.59	0.6	0.7	0.5	DAO	chr12	protein_coding	D-amino-acid oxidase
down	ENSG00000235090.1	-2.25877	-2.4485	0.00246413	0.0442387	0	0.66	0.13	0.04	0	0.12	RPL7L1P3	chr7	processed_pseudogene	ribosomal protein L7-like 1 pseudogene 3
down	ENSG00000174827.13	-1.18693	4.33921	1.06178e-09	1.85883e-07	10.32	10.86	11.52	5.45	4.68	4.65	PDZK1	chr1	protein_coding	PDZ domain containing 1
down	ENSG00000153904.18	-1.20417	5.5247	3.17277e-10	6.51822e-08	12.88	13.11	11.61	6.3	5.97	4.57	DDAH1	chr1	protein_coding	dimethylarginine dimethylaminohydrolase 1
down	ENSG00000260095.1	-2.08819	-2.00004	0.000488118	0.0130503	0.74	0.54	0.83	0.21	0	0.29	RP11-715J22.3	chr16	antisense	--
down	ENSG00000162645.12	-1.07356	0.567511	4.19151e-05	0.00181908	0.71	0.65	0.98	0.49	0.4	0.24	GBP2	chr1	protein_coding	guanylate binding protein 2, interferon-inducible
down	ENSG00000101276.14	-1.02961	0.162145	0.000250886	0.00775831	0.39	0.42	0.37	0.16	0.32	0.11	SLC52A3	chr20	protein_coding	solute carrier family 52 (riboflavin transporter), member 3
down	ENSG00000138449.10	-1.13368	7.55381	2.09585e-09	3.34763e-07	67.44	62.04	71.58	34.34	34.37	25.83	SLC40A1	chr2	protein_coding	solute carrier family 40 (iron-regulated transporter), member 1
down	ENSG00000172460.14	-1.32674	-1.15778	0.00123407	0.0262278	0.46	0.74	0.51	0.06	0.37	0.26	PRSS30P	chr16	unitary_pseudogene	protease, serine, 30, pseudogene
down	ENSG00000253313.5	-1.34323	1.98714	9.19683e-10	1.69069e-07	3.06	3.23	3.65	1.41	1.39	1.22	C1orf210	chr1	protein_coding	chromosome 1 open reading frame 210
down	ENSG00000197408.8	-1.35862	-0.343412	2.62398e-05	0.00122638	0.29	0.35	0.26	0.14	0.17	0.05	CYP2B6	chr19	protein_coding	cytochrome P450, family 2, subfamily B, polypeptide 6
down	ENSG00000115590.13	-1.03805	1.06491	1.55659e-05	0.00079463	1.38	1.08	1.5	0.87	0.74	0.37	IL1R2	chr2	protein_coding	interleukin 1 receptor, type II
down	ENSG00000204397.7	-5.06626	-3.03341	0.000634612	0.0159229	0.19	0.13	0.07	0	0	0	CARD16	chr11	protein_coding	caspase recruitment domain family, member 16
down	ENSG00000148795.5	-1.28266	-0.932832	0.000544791	0.0141504	0.36	0.33	0.26	0.16	0.17	0.06	CYP17A1	chr10	protein_coding	cytochrome P450, family 17, subfamily A, polypeptide 1
down	ENSG00000211456.10	-1.00874	4.17404	2.14224e-07	2.01157e-05	5.84	5.53	5.66	3.11	3.24	2.38	SACM1L	chr3	protein_coding	SAC1 suppressor of actin mutations 1-like (yeast)
down	ENSG00000229005.2	-1.55793	1.11895	2.39762e-10	5.19546e-08	3.17	3.2	2.92	1.14	1.04	1.06	HNF4A-AS1	chr20	antisense	HNF4A antisense RNA 1
down	ENSG00000167608.11	-1.01367	1.73996	5.28041e-06	0.000311665	1.28	1.92	1.57	0.75	0.85	0.83	TMC4	chr19	protein_coding	transmembrane channel-like 4
down	ENSG00000181458.10	-1.29273	-0.172319	2.60282e-05	0.00122017	0.63	0.44	0.55	0.31	0.21	0.16	TMEM45A	chr3	protein_coding	transmembrane protein 45A
down	ENSG00000268621.5	-1.15591	-0.603449	0.000698087	0.0171408	0.61	0.41	0.62	0.32	0.22	0.21	AC006262.5	chr19	lincRNA	--
down	ENSG00000131471.6	-1.00924	0.759712	7.33705e-05	0.00291853	0.3	0.54	0.5	0.25	0.17	0.26	AOC3	chr17	protein_coding	amine oxidase, copper containing 3
down	ENSG00000131482.9	-1.39104	-0.282997	1.06002e-05	0.000569268	0.29	0.33	0.35	0.16	0.11	0.11	G6PC	chr17	protein_coding	glucose-6-phosphatase, catalytic subunit
down	ENSG00000049540.16	-1.13524	0.320194	4.25649e-05	0.00183955	0.42	0.41	0.26	0.15	0.15	0.21	ELN	chr7	protein_coding	elastin
down	ENSG00000106853.16	-1.53184	7.71823	1.07663e-15	7.25252e-13	180.11	153.95	205.92	72.86	67.63	52.17	PTGR1	chr9	protein_coding	prostaglandin reductase 1
down	ENSG00000160202.7	-1.01594	0.175855	0.000278252	0.00842438	0.88	0.76	0.69	0.47	0.46	0.26	CRYAA	chr21	protein_coding	crystallin, alpha A
down	ENSG00000127324.8	-2.25703	-0.0630157	1.62213e-12	5.29105e-10	0.54	0.79	0.91	0.2	0.17	0.11	TSPAN8	chr12	protein_coding	tetraspanin 8
down	ENSG00000109819.8	-1.09166	2.02025	5.07679e-07	4.1839e-05	0.6	0.54	0.48	0.31	0.27	0.21	PPARGC1A	chr4	protein_coding	peroxisome proliferator-activated receptor gamma, coactivator 1 alpha
down	ENSG00000110245.11	-1.04883	5.06876	4.49127e-08	5.19295e-06	66.24	57.1	69.89	35.44	34.54	26.37	APOC3	chr11	protein_coding	apolipoprotein C-III
down	ENSG00000165512.4	-1.92316	-0.406098	1.46544e-08	1.97433e-06	0.36	0.41	0.4	0.11	0.16	0.04	ZNF22	chr10	protein_coding	zinc finger protein 22
down	ENSG00000107738.19	-1.92207	1.80708	8.85914e-17	7.6255e-14	1.06	0.91	1.15	0.34	0.28	0.22	C10orf54	chr10	protein_coding	chromosome 10 open reading frame 54
down	ENSG00000244062.1	-1.47381	1.24426	1.04146e-09	1.83613e-07	1.61	1.82	1.33	0.51	0.37	0.88	RP11-404G16.2	chr3	processed_pseudogene	--
down	ENSG00000127084.17	-1.05135	2.25941	7.82117e-07	5.99888e-05	1.12	1.37	1.83	0.61	0.76	0.77	FGD3	chr9	protein_coding	FYVE, RhoGEF and PH domain containing 3
down	ENSG00000112494.9	-1.35344	4.29414	4.36861e-12	1.32716e-09	12.11	11.6	11.92	5.62	4.89	3.87	UNC93A	chr6	protein_coding	unc-93 homolog A (C. elegans)
down	ENSG00000052802.12	-1.0491	6.90383	2.9755e-08	3.67338e-06	56.66	54.94	59.18	31.34	31.81	22.08	MSMO1	chr4	protein_coding	methylsterol monooxygenase 1
down	ENSG00000174804.3	-1.06584	5.63501	2.2833e-08	2.93579e-06	7.89	8.28	8.23	4.57	4.03	3.41	FZD4	chr11	protein_coding	frizzled class receptor 4
down	ENSG00000116176.6	-1.80119	-0.401456	6.70741e-08	7.29272e-06	0.82	0.73	1.11	0.2	0.32	0.26	TPSG1	chr16	protein_coding	tryptase gamma 1
down	ENSG00000086696.10	-1.81642	4.27779	7.90024e-20	8.74302e-17	19.09	16.99	19.48	6.44	5.64	4.18	HSD17B2	chr16	protein_coding	hydroxysteroid (17-beta) dehydrogenase 2
down	ENSG00000120937.8	-1.94267	-1.00215	8.52538e-07	6.4749e-05	1.04	0.89	0.78	0.28	0.27	0.16	NPPB	chr1	protein_coding	natriuretic peptide B
down	ENSG00000084110.10	-1.00058	0.592439	0.000147183	0.00510152	0.43	0.57	0.31	0.19	0.21	0.28	HAL	chr12	protein_coding	histidine ammonia-lyase
down	ENSG00000203690.11	-2.16592	-1.81046	9.92382e-05	0.00372287	0.07	0.12	0.08	0.02	0.03	0.01	TCP10	chr6	protein_coding	t-complex 10
down	ENSG00000171234.13	-1.04872	5.18773	4.29547e-08	5.02278e-06	24.18	20.09	25.46	12.86	13.32	8.64	UGT2B7	chr4	protein_coding	UDP glucuronosyltransferase 2 family, polypeptide B7
down	ENSG00000188959.9	-1.17851	2.46685	2.27726e-08	2.93579e-06	2.36	2.74	2.4	1.59	0.94	0.88	C9orf152	chr9	protein_coding	chromosome 9 open reading frame 152
down	ENSG00000127329.14	-1.38269	-0.858111	0.000236891	0.00737001	0.05	0.05	0.05	0.01	0.01	0.03	PTPRB	chr12	protein_coding	protein tyrosine phosphatase, receptor type, B
down	ENSG00000243910.7	-1.36624	1.90992	7.67296e-10	1.45866e-07	3.38	3.03	3.99	1.45	1.45	1.24	TUBA4B	chr2	protein_coding	tubulin, alpha 4b
down	ENSG00000137204.14	-1.26032	0.136069	1.2234e-05	0.000640364	0.45	0.46	0.5	0.19	0.18	0.23	SLC22A7	chr6	protein_coding	solute carrier family 22 (organic anion transporter), member 7
down	ENSG00000279026.1	-1.31977	0.364623	1.86615e-06	0.000127371	0.84	0.82	0.44	0.28	0.27	0.32	RP3-414A15.12	chr14	TEC	--
down	ENSG00000196517.11	-1.04298	1.27296	9.11453e-06	0.000500766	0.58	0.71	0.69	0.35	0.33	0.31	SLC6A9	chr1	protein_coding	solute carrier family 6 (neurotransmitter transporter, glycine), member 9
down	ENSG00000100197.20	-1.06076	1.28263	6.83122e-06	0.000389832	1.46	1.92	1.56	0.58	0.84	1.01	CYP2D6	chr22	protein_coding	cytochrome P450, family 2, subfamily D, polypeptide 6
down	ENSG00000213542.3	-1.20285	-1.02888	0.00163406	0.0327194	0.37	0.67	1.02	0.28	0.41	0.22	RP11-467H10.1	chr7	processed_pseudogene	--
down	ENSG00000105672.14	-1.44925	-1.07715	0.000309968	0.00915632	0.35	0.3	0.23	0.09	0.09	0.15	ETV2	chr19	protein_coding	ets variant 2
down	ENSG00000148965.8	-1.32783	5.02569	6.04273e-12	1.76647e-09	51.92	37.14	54.99	23.92	18.19	17.02	SAA4	chr11	protein_coding	serum amyloid A4, constitutive
down	ENSG00000166035.10	-1.0328	3.07605	3.24758e-07	2.85889e-05	2.13	2.09	2.32	1.3	1.21	0.79	LIPC	chr15	protein_coding	lipase, hepatic
down	ENSG00000244242.1	-1.18354	0.174573	3.06594e-05	0.00139302	0.38	0.37	0.33	0.16	0.12	0.21	IFITM10	chr11	protein_coding	interferon induced transmembrane protein 10
down	ENSG00000103089.8	-3.40225	-2.36789	2.52066e-05	0.00119981	0.08	0.1	0.1	0	0	0.02	FA2H	chr16	protein_coding	fatty acid 2-hydroxylase
down	ENSG00000110203.8	-2.72973	-1.94237	6.67737e-06	0.00038317	0.42	0.19	0.54	0.03	0.13	0	FOLR3	chr11	protein_coding	folate receptor 3 (gamma)
down	ENSG00000172478.17	-1.47866	3.18466	4.56409e-13	1.70395e-10	4	4.33	4.94	1.51	1.8	1.59	C2orf54	chr2	protein_coding	chromosome 2 open reading frame 54
down	ENSG00000205420.10	-5.47349	-2.80918	4.87919e-05	0.00205144	0.08	0.03	0.08	0	0	0	KRT6A	chr12	protein_coding	keratin 6A, type II
down	ENSG00000253196.1	-1.26207	0.650331	1.34719e-06	9.5746e-05	2.92	3.08	2.54	1.76	1.01	0.89	RP11-706C16.7	chr8	antisense	--
down	ENSG00000236393.1	-2.32999	-2.40785	0.00154151	0.0311793	0.1	0.05	0.04	0.01	0	0.03	RP11-320G24.1	chrX	lincRNA	--
down	ENSG00000229227.8	-1.57179	-1.6399	0.00130217	0.0273561	0.37	0.29	0.38	0.08	0.21	0.06	RP11-38L15.2	chr10	lincRNA	--
down	ENSG00000198074.9	-1.12723	8.33982	2.44367e-09	3.84436e-07	248.03	215.49	286.18	145.66	124.04	84.9	AKR1B10	chr7	protein_coding	aldo-keto reductase family 1, member B10 (aldose reductase)
down	ENSG00000126231.13	-1.18398	1.62336	1.81196e-07	1.73831e-05	2.4	2.38	2.48	1.39	0.99	0.9	PROZ	chr13	protein_coding	protein Z, vitamin K-dependent plasma glycoprotein
down	ENSG00000197181.11	-1.47217	0.757769	1.35418e-08	1.84044e-06	0.38	0.35	0.42	0.14	0.11	0.18	PIWIL2	chr8	protein_coding	piwi-like RNA-mediated gene silencing 2
down	ENSG00000005844.17	-1.61289	0.62853	1.6999e-09	2.84728e-07	0.38	0.46	0.32	0.14	0.11	0.14	ITGAL	chr16	protein_coding	integrin, alpha L (antigen CD11A (p180), lymphocyte function-associated antigen 1; alpha polypeptide)
down	ENSG00000121064.12	-1.1528	4.30623	3.10568e-09	4.76414e-07	12.82	12.44	12.31	6.28	6.07	5.07	SCPEP1	chr17	protein_coding	serine carboxypeptidase 1
down	ENSG00000060566.13	-1.19436	3.7445	1.74318e-09	2.90408e-07	5.85	6.47	6.71	3.02	2.46	3.05	CREB3L3	chr19	protein_coding	cAMP responsive element binding protein 3-like 3
down	ENSG00000263639.5	-1.17389	-0.42642	0.000328303	0.00950758	1.96	1.52	1.7	0.84	0.88	0.64	MSMB	chr10	protein_coding	microseminoprotein, beta-
down	ENSG00000279722.1	-1.22328	-0.748577	0.000498898	0.0132427	0.36	0.31	0.19	0.15	0.12	0.11	RP11-44F14.6	chr16	TEC	--
down	ENSG00000276409.4	-1.03552	2.6124	6.0024e-07	4.81856e-05	1.99	2.49	2.2	1.27	1.14	0.94	CCL14	chr17	protein_coding	chemokine (C-C motif) ligand 14
down	ENSG00000266983.1	-2.77042	-2.40832	0.000301634	0.00894425	0.46	0.29	0.19	0	0.04	0.09	CTC-232P5.1	chr19	antisense	--
down	ENSG00000118514.13	-1.34275	-1.20505	0.00133501	0.0278385	0.15	0.19	0.23	0.09	0.06	0.08	ALDH8A1	chr6	protein_coding	aldehyde dehydrogenase 8 family, member A1
down	ENSG00000158865.12	-1.09669	3.21615	5.47543e-08	6.19223e-06	3.73	3.89	4.69	1.99	1.91	2.02	SLC5A11	chr16	protein_coding	solute carrier family 5 (sodium/inositol cotransporter), member 11
down	ENSG00000197632.8	-3.61614	-2.75922	0.000414767	0.0114753	0.12	0.01	0.07	0	0.01	0	SERPINB2	chr18	protein_coding	serpin peptidase inhibitor, clade B (ovalbumin), member 2
down	ENSG00000167105.7	-1.61735	-0.445437	1.28025e-06	9.16194e-05	0.37	0.32	0.28	0.11	0.1	0.12	TMEM92	chr17	protein_coding	transmembrane protein 92
down	ENSG00000089356.16	-3.27743	-2.44765	7.42678e-05	0.00293913	0.07	0.08	0.05	0.01	0	0.01	FXYD3	chr19	protein_coding	FXYD domain containing ion transport regulator 3
down	ENSG00000275215.1	-3.69337	-2.71319	0.000231674	0.00726606	0	2.98	0	0	0	0.19	RNA5-8S5	chr21	rRNA	RNA, 5.8S ribosomal 5
down	ENSG00000169403.11	-1.088	4.13544	2.44229e-08	3.06393e-06	4.41	4.43	4.74	2.1	2.22	2.25	PTAFR	chr1	protein_coding	platelet-activating factor receptor
down	ENSG00000227471.8	-1.70114	1.85189	6.72626e-14	3.02068e-11	3.37	2.25	3.39	0.29	1.5	1.05	AKR1B15	chr7	protein_coding	aldo-keto reductase family 1, member B15
down	ENSG00000186198.3	-1.57077	2.1683	7.11645e-13	2.47772e-10	6.41	5.67	6.9	2.13	2.57	1.88	SLC51B	chr15	protein_coding	solute carrier family 51, beta subunit
down	ENSG00000150782.11	-1.43264	3.74274	7.08658e-13	2.47772e-10	15.8	13.07	15.82	6.12	6.27	4.68	IL18	chr11	protein_coding	interleukin 18
down	ENSG00000005001.9	-1.78583	-1.32729	5.98473e-05	0.00243371	0.27	0.35	0.41	0.06	0.06	0.18	PRSS22	chr16	protein_coding	protease, serine, 22
down	ENSG00000257017.8	-1.42179	4.16212	4.32851e-13	1.65589e-10	13.61	12.52	11.99	6.77	4.94	3	HP	chr16	protein_coding	haptoglobin
down	ENSG00000182866.16	-1.1885	1.98129	6.06454e-08	6.72396e-06	1.83	1.73	2.26	0.77	0.97	0.89	LCK	chr1	protein_coding	LCK proto-oncogene, Src family tyrosine kinase
down	ENSG00000184012.11	-1.27083	2.18619	3.79181e-09	5.62186e-07	1.52	1.81	1.8	0.8	0.69	0.7	TMPRSS2	chr21	protein_coding	transmembrane protease, serine 2
down	ENSG00000173213.8	-1.38363	-1.24113	0.00108923	0.0237941	0.2	0.2	0.22	0.05	0.12	0.08	TUBB8P12	chr18	protein_coding	--
down	ENSG00000264230.7	-2.04452	-2.36619	0.00256048	0.0455724	0.06	0.04	0.18	0.04	0.01	0.01	ANXA8L1	chr10	protein_coding	annexin A8-like 1
down	ENSG00000206150.3	-1.00866	-0.498325	0.00227309	0.0418765	0.45	0.53	0.47	0.12	0.39	0.23	RNASE13	chr14	protein_coding	ribonuclease, RNase A family, 13 (non-active)
down	ENSG00000226510.1	-3.02582	-1.73368	2.56694e-07	2.32579e-05	0.37	0.61	0.49	0	0.14	0.04	UPK1A-AS1	chr19	antisense	UPK1A antisense RNA 1
down	ENSG00000155465.18	-2.354	1.59333	2.65528e-22	4.57106e-19	1.53	1.63	1.78	0.34	0.39	0.26	SLC7A7	chr14	protein_coding	solute carrier family 7 (amino acid transporter light chain, y+L system), member 7
down	ENSG00000273394.1	-1.52281	-1.75792	0.00273327	0.0478443	0.71	0.33	0.63	0.15	0.24	0.2	RP11-255E6.6	chr3	antisense	--
down	ENSG00000256813.1	-1.53658	-1.14195	0.000256867	0.00789636	1.09	1.31	0.79	0.33	0.39	0.41	RP11-804A23.4	chr11	antisense	--
down	ENSG00000132274.15	-1.28905	0.746595	4.83497e-07	4.01665e-05	0.75	0.55	0.77	0.27	0.33	0.28	TRIM22	chr11	protein_coding	tripartite motif containing 22
down	ENSG00000096088.16	-1.08322	5.88451	1.27488e-08	1.75576e-06	39.26	37.03	42.34	23.38	18.85	15.52	PGC	chr6	protein_coding	progastricsin (pepsinogen C)
down	ENSG00000177494.5	-2.20773	-2.09054	0.000299544	0.00891639	0.09	0.06	0.19	0.02	0.04	0.01	ZBED2	chr3	protein_coding	zinc finger, BED-type containing 2
down	ENSG00000146859.6	-1.25648	2.49243	2.44405e-09	3.84436e-07	3.59	2.71	4.27	1.78	1.44	1.33	TMEM140	chr7	protein_coding	transmembrane protein 140
down	ENSG00000110108.9	-1.32165	-1.40816	0.00183834	0.0357368	0.13	0.2	0.17	0.1	0.07	0.04	TMEM109	chr11	protein_coding	transmembrane protein 109
down	ENSG00000137393.9	-1.10226	-0.432477	0.000965279	0.0216434	0.15	0.16	0.18	0.07	0.05	0.11	RNF144B	chr6	protein_coding	ring finger protein 144B
down	ENSG00000121075.9	-1.90986	1.78503	1.63589e-16	1.33398e-13	1.15	1.48	1.56	0.41	0.32	0.41	TBX4	chr17	protein_coding	T-box 4
down	ENSG00000214940.8	-1.70747	-1.64011	0.000689588	0.0169589	0.14	0.41	0.13	0.02	0.05	0.15	NPIPA8	chr16	protein_coding	nuclear pore complex interacting protein family, member A8
down	ENSG00000272941.1	-2.10802	-0.0557709	2.3296e-11	6.0156e-09	0.82	1.19	1.46	0.33	0.33	0.15	RP11-134L10.1	chr7	antisense	--
down	ENSG00000183134.4	-1.376	1.7746	8.9651e-10	1.66348e-07	1.56	1.43	1.51	0.73	0.66	0.4	PTGDR2	chr11	protein_coding	prostaglandin D2 receptor 2
down	ENSG00000260459.2	-1.07912	1.98104	7.77426e-07	5.98188e-05	8.58	11.67	9.02	5.38	4.65	4.23	FTLP14	chr16	processed_pseudogene	ferritin, light polypeptide pseudogene 14
down	ENSG00000151632.16	-1.00184	9.87752	1.02861e-07	1.05542e-05	249.04	202.51	288.34	160.61	129.94	91.19	AKR1C2	chr10	protein_coding	aldo-keto reductase family 1, member C2
down	ENSG00000171840.11	-1.34675	-0.163853	1.18025e-05	0.000621877	0.61	0.45	0.53	0.19	0.27	0.18	NINJ2	chr12	protein_coding	ninjurin 2
down	ENSG00000158023.9	-1.14767	1.6359	3.87823e-07	3.34748e-05	0.71	0.67	0.89	0.44	0.33	0.28	WDR66	chr12	protein_coding	WD repeat domain 66
down	ENSG00000130234.10	-3.28678	-2.44409	4.32633e-05	0.00186195	0.05	0.02	0.11	0.01	0.01	0	ACE2	chrX	protein_coding	angiotensin I converting enzyme 2
down	ENSG00000250508.1	-1.03455	-0.208427	0.000671961	0.0165913	0.34	0.26	0.29	0.21	0.16	0.08	RP11-757G1.6	chr11	lincRNA	--
down	ENSG00000156675.15	-1.24722	4.4003	1.48982e-10	3.32122e-08	2.93	3.03	3.13	1.23	1.25	1.45	RAB11FIP1	chr8	protein_coding	RAB11 family interacting protein 1 (class I)
down	ENSG00000268964.1	-2.33721	-2.40682	0.00154151	0.0311793	0.06	0.08	0.11	0	0.03	0.01	ERVV-2	chr19	protein_coding	endogenous retrovirus group V, member 2
down	ENSG00000146678.9	-1.79561	6.74997	1.41188e-20	1.82291e-17	88.63	92.42	89.93	28.49	28.4	23.57	IGFBP1	chr7	protein_coding	insulin-like growth factor binding protein 1
down	ENSG00000137869.13	-1.07634	3.32239	8.04291e-08	8.56446e-06	2.28	2	2.08	1.13	1.09	0.89	CYP19A1	chr15	protein_coding	cytochrome P450, family 19, subfamily A, polypeptide 1
down	ENSG00000137673.8	-1.88248	-1.86055	0.00050688	0.0133333	0.33	0.14	0.35	0.1	0.07	0.05	MMP7	chr11	protein_coding	matrix metallopeptidase 7
down	ENSG00000136059.14	-1.06617	1.09083	9.95184e-06	0.000539122	0.84	0.74	0.86	0.42	0.43	0.35	VILL	chr3	protein_coding	villin-like
down	ENSG00000184557.4	-1.12609	-0.298972	0.000412431	0.0114722	0.35	0.3	0.36	0.14	0.11	0.23	SOCS3	chr17	protein_coding	suppressor of cytokine signaling 3
down	ENSG00000136167.13	-1.11057	0.448631	3.73411e-05	0.00164126	0.36	0.43	0.39	0.28	0.19	0.1	LCP1	chr13	protein_coding	lymphocyte cytosolic protein 1 (L-plastin)
down	ENSG00000121895.7	-2.74374	-2.15741	5.40708e-05	0.00223697	0.22	0.06	0.12	0	0.04	0.01	TMEM156	chr4	protein_coding	transmembrane protein 156
down	ENSG00000115596.3	-1.43832	-0.317035	6.99732e-06	0.000396391	0.47	0.52	0.74	0.27	0.19	0.18	WNT6	chr2	protein_coding	wingless-type MMTV integration site family, member 6
down	ENSG00000052344.15	-1.47382	3.57591	2.43947e-13	9.9463e-11	7.51	8.35	9.17	3.35	2.84	3.07	PRSS8	chr16	protein_coding	protease, serine, 8
down	ENSG00000149742.9	-1.28789	-0.170978	2.60282e-05	0.00122017	0.42	0.47	0.46	0.18	0.19	0.21	SLC22A9	chr11	protein_coding	solute carrier family 22 (organic anion transporter), member 9
down	ENSG00000182986.12	-1.52883	-1.66137	0.00181794	0.0354292	0.06	0.04	0.05	0.01	0.02	0.02	ZNF320	chr19	protein_coding	zinc finger protein 320
down	ENSG00000251141.5	-1.85771	-2.00009	0.0011132	0.0240549	0.07	0.17	0.19	0.04	0.01	0.06	RP11-53O19.1	chr5	antisense	--
down	ENSG00000160870.12	-1.39956	0.310228	4.78009e-07	3.98892e-05	0.83	0.72	0.79	0.38	0.32	0.22	CYP3A7	chr7	protein_coding	cytochrome P450, family 3, subfamily A, polypeptide 7
down	ENSG00000130307.11	-2.19384	-0.625836	1.99886e-09	3.25993e-07	0.21	0.3	0.28	0.05	0.09	0.03	USHBP1	chr19	protein_coding	Usher syndrome 1C binding protein 1
down	ENSG00000146700.8	-1.39703	3.73635	2.33398e-12	7.37992e-10	5.71	5.99	6.73	2.49	2.63	2.08	SSC4D	chr7	protein_coding	scavenger receptor cysteine rich family, 4 domains
down	ENSG00000215246.5	-2.35271	-1.31205	3.87222e-07	3.34748e-05	0.13	0.18	0.13	0.02	0.03	0.04	RP11-43F13.3	chr5	antisense	--
down	ENSG00000101162.3	-1.37159	2.41247	1.20544e-10	2.74655e-08	1.86	2.02	1.95	0.89	0.77	0.66	TUBB1	chr20	protein_coding	tubulin, beta 1 class VI
down	ENSG00000168961.16	-1.67961	-0.179269	1.04914e-07	1.0694e-05	0.35	0.4	0.34	0.1	0.11	0.14	LGALS9	chr17	protein_coding	lectin, galactoside-binding, soluble, 9
down	ENSG00000135480.14	-1.26225	1.77979	1.79675e-08	2.35915e-06	2.12	2.09	3.1	0.87	1.08	1.17	KRT7	chr12	protein_coding	keratin 7, type II
down	ENSG00000262188.1	-1.41037	-1.34526	0.00126373	0.0267115	0.26	0.24	0.35	0.05	0.05	0.22	RP11-353N14.4	chr17	lincRNA	--
down	ENSG00000124466.8	-1.04561	1.6832	3.30319e-06	0.000209746	2.18	1.87	2.7	1.04	1.3	1.02	LYPD3	chr19	protein_coding	LY6/PLAUR domain containing 3
down	ENSG00000281938.1	-1.07369	0.0313688	0.000262498	0.00806147	0.4	0.27	0.46	0.21	0.18	0.15	ACSL6	chr5	protein_coding	acyl-CoA synthetase long-chain family member 6
down	ENSG00000196136.16	-1.0439	-0.447151	0.00142623	0.0293847	0.18	0.2	0.19	0.1	0.12	0.07	SERPINA3	chr14	protein_coding	serpin peptidase inhibitor, clade A (alpha-1 antiproteinase, antitrypsin), member 3
down	ENSG00000231574.5	-1.14269	-0.684867	0.00100746	0.022443	0.22	0.23	0.26	0.12	0.12	0.09	RP11-91K9.1	chr3	lincRNA	--
down	ENSG00000163131.10	-1.52155	0.947113	1.58006e-09	2.67548e-07	0.52	0.52	0.78	0.19	0.17	0.28	CTSS	chr1	protein_coding	cathepsin S
down	ENSG00000108551.4	-1.56473	3.81043	5.35021e-15	3.31574e-12	9.97	9.39	12.72	3.71	3.92	3.52	RASD1	chr17	protein_coding	RAS, dexamethasone-induced 1
down	ENSG00000104808.7	-1.2145	-0.307624	0.000122097	0.00440446	0.97	0.52	1.13	0.38	0.4	0.37	DHDH	chr19	protein_coding	dihydrodiol dehydrogenase (dimeric)
down	ENSG00000136872.17	-1.48522	-0.500707	9.51694e-06	0.000520108	0.4	0.13	0.52	0.12	0.14	0.12	ALDOB	chr9	protein_coding	aldolase B, fructose-bisphosphate
down	ENSG00000237975.6	-1.32002	-0.290211	4.52135e-05	0.0019378	0.12	0.17	0.14	0.05	0.04	0.09	FLG-AS1	chr1	antisense	FLG antisense RNA 1
down	ENSG00000138823.12	-1.51805	-0.63793	1.2777e-05	0.000664109	0.19	0.14	0.14	0.06	0.04	0.06	MTTP	chr4	protein_coding	microsomal triglyceride transfer protein
down	ENSG00000172116.21	-2.29827	0.282715	1.69998e-14	8.92834e-12	0.91	0.98	0.9	0.21	0.2	0.17	CD8B	chr2	protein_coding	CD8b molecule
down	ENSG00000261183.5	-1.07553	-0.285126	0.000565565	0.0145437	1.22	0.76	1.04	0.65	0.47	0.34	RP11-532F12.5	chr15	antisense	--
down	ENSG00000161031.12	-2.32939	-0.345663	1.16629e-11	3.22678e-09	0.3	0.38	0.37	0.06	0.09	0.06	PGLYRP2	chr19	protein_coding	peptidoglycan recognition protein 2
down	ENSG00000282301.1	-1.89449	1.14287	3.33541e-14	1.56597e-11	1.33	1.77	1.73	0.54	0.37	0.42	CYP3A7-CYP3A51P	chr7	protein_coding	CYP3A7-CYP3A51P readthrough
down	ENSG00000106333.12	-1.12689	0.532382	1.85449e-05	0.000925364	1.05	1.15	0.79	0.43	0.51	0.47	PCOLCE	chr7	protein_coding	procollagen C-endopeptidase enhancer
down	ENSG00000010327.10	-1.16636	0.2023	3.98811e-05	0.00174547	0.11	0.21	0.2	0.07	0.08	0.09	STAB1	chr3	protein_coding	stabilin 1
down	ENSG00000248538.6	-4.19402	-2.4039	2.28329e-06	0.000151504	0.31	0.11	0.56	0	0	0.04	RP11-10A14.5	chr8	lincRNA	--
down	ENSG00000260105.6	-1.48613	-1.23924	0.000487401	0.0130503	0.14	0.19	0.24	0.05	0.08	0.07	AOC4P	chr17	transcribed_unprocessed_pseudogene	amine oxidase, copper containing 4, pseudogene
down	ENSG00000267056.2	-1.28899	-1.12605	0.000939744	0.0212709	0.32	0.56	0.34	0.18	0.17	0.16	AC005336.4	chr19	processed_pseudogene	--
down	ENSG00000267727.1	-1.00289	-0.563942	0.00268339	0.0472981	1.39	2	1.18	0.8	0.9	0.65	CTD-2540B15.7	chr19	antisense	--
down	ENSG00000139926.15	-1.15656	0.593092	9.74627e-06	0.000530769	0.34	0.35	0.33	0.2	0.16	0.11	FRMD6	chr14	protein_coding	FERM domain containing 6
down	ENSG00000134323.10	-1.06505	4.65621	3.39008e-08	4.11954e-06	10.88	12.43	11.79	6.38	5.91	5	MYCN	chr2	protein_coding	v-myc avian myelocytomatosis viral oncogene neuroblastoma derived homolog
down	ENSG00000125775.14	-2.11107	2.38521	1.3297e-21	2.06017e-18	3.63	3.9	4.42	1.03	0.89	0.92	SDCBP2	chr20	protein_coding	syndecan binding protein (syntenin) 2
down	ENSG00000122711.8	-1.80922	-2.02916	0.00165029	0.0329105	0.25	0.37	0.59	0.13	0.04	0.17	SPINK4	chr9	protein_coding	serine peptidase inhibitor, Kazal type 4
down	ENSG00000230409.3	-2.45832	-2.33425	0.00059783	0.0151958	0.03	0.56	0.1	0.06	0.03	0.03	TCEA1P2	chr3	processed_pseudogene	transcription elongation factor A (SII), 1 pseudogene 2
down	ENSG00000147223.5	-1.17172	-0.624852	0.000867509	0.020016	0.52	0.65	0.68	0.23	0.25	0.36	RIPPLY1	chrX	protein_coding	ripply transcriptional repressor 1
down	ENSG00000172346.14	-1.47805	0.963879	3.51553e-09	5.33998e-07	0.95	0.73	1.01	0.29	0.4	0.31	CSDC2	chr22	protein_coding	cold shock domain containing C2, RNA binding
down	ENSG00000115738.9	-1.03234	7.52482	4.61024e-08	5.31069e-06	104.95	92.21	112.44	58.19	55.17	42.8	ID2	chr2	protein_coding	inhibitor of DNA binding 2, dominant negative helix-loop-helix protein
down	ENSG00000100024.14	-1.53647	-0.124259	5.99755e-07	4.81856e-05	0.38	0.27	0.28	0.16	0.1	0.07	UPB1	chr22	protein_coding	ureidopropionase, beta
down	ENSG00000211452.10	-1.6703	2.99947	8.65148e-16	6.38294e-13	5.58	5.68	6.17	2.27	1.92	1.45	DIO1	chr1	protein_coding	deiodinase, iodothyronine, type I
down	ENSG00000211584.13	-1.32804	5.62929	4.45432e-12	1.34006e-09	17.05	17.6	20.24	7.55	7.29	7.63	SLC48A1	chr12	protein_coding	solute carrier family 48 (heme transporter), member 1
down	ENSG00000110092.3	-1.44686	8.54506	2.97071e-14	1.46116e-11	106.02	108.19	118.52	38.27	38.31	48.57	CCND1	chr11	protein_coding	cyclin D1
down	ENSG00000105697.7	-1.91069	4.70754	3.33304e-22	5.43584e-19	44.25	41.91	52.01	14.52	11.99	11.31	HAMP	chr19	protein_coding	hepcidin antimicrobial peptide
down	ENSG00000265962.1	-1.08494	-0.0497843	0.000275432	0.00835926	1.18	1.21	1.68	0.74	0.6	0.63	GACAT2	chr18	antisense	gastric cancer associated transcript 2 (non-protein coding)
down	ENSG00000261863.1	-1.54545	-0.582489	7.55764e-06	0.000424255	0.82	0.46	0.63	0.28	0.26	0.13	RP11-141J13.5	chr17	lincRNA	--
down	ENSG00000189233.11	-1.10096	-0.294036	0.000499274	0.0132427	0.19	0.28	0.24	0.09	0.14	0.11	NUGGC	chr8	protein_coding	nuclear GTPase, germinal center associated
down	ENSG00000170476.15	-2.48746	-2.57375	0.00224924	0.0415854	0.13	0.32	0.14	0.07	0	0.03	MZB1	chr5	protein_coding	marginal zone B and B1 cell-specific protein
down	ENSG00000130876.11	-1.01949	3.41135	3.11544e-07	2.75322e-05	6.11	6.81	6.62	4.38	3.26	2.31	SLC7A10	chr19	protein_coding	solute carrier family 7 (neutral amino acid transporter light chain, asc system), member 10
down	ENSG00000128510.10	-1.22887	0.262077	1.21124e-05	0.00063516	0.45	0.41	0.68	0.18	0.23	0.25	CPA4	chr7	protein_coding	carboxypeptidase A4
down	ENSG00000164406.7	-1.49931	2.44591	2.14075e-12	6.90995e-10	3.45	3.11	3.13	1.39	0.96	1.17	LEAP2	chr5	protein_coding	liver expressed antimicrobial peptide 2
down	ENSG00000187185.4	-1.33467	-0.637643	0.00011221	0.00411972	0.42	0.3	0.38	0.16	0.15	0.14	CTD-2600O9.1	chr16	lincRNA	--
down	ENSG00000006555.10	-1.35656	-1.13992	0.00057711	0.0147742	0.14	0.08	0.12	0.06	0.04	0.04	TTC22	chr1	protein_coding	tetratricopeptide repeat domain 22
down	ENSG00000136305.11	-1.06685	5.48772	2.30906e-08	2.95664e-06	18.52	18.63	19.54	10.58	9.57	7.76	CIDEB	chr14	protein_coding	cell death-inducing DFFA-like effector b
down	ENSG00000196083.9	-1.05679	2.93959	2.20292e-07	2.05608e-05	0.9	0.9	0.97	0.49	0.44	0.43	IL1RAP	chr3	protein_coding	interleukin 1 receptor accessory protein
down	ENSG00000113889.11	-1.80127	0.558081	3.21699e-11	8.10446e-09	0.61	0.44	0.53	0.23	0.12	0.12	KNG1	chr3	protein_coding	kininogen 1
down	ENSG00000268069.2	-1.07016	0.045387	0.00022215	0.00703142	1.12	1.21	0.94	0.91	0.48	0.21	RP5-1057I20.4	chr12	antisense	--
down	ENSG00000273893.1	-1.42533	-0.577857	2.59532e-05	0.00122017	0.99	0.92	1.54	0.63	0.27	0.41	RP1-101A2.1	chr20	sense_intronic	--
down	ENSG00000102575.10	-1.27595	0.274573	5.34562e-06	0.000314413	0.8	0.6	1.05	0.37	0.27	0.4	ACP5	chr19	protein_coding	acid phosphatase 5, tartrate resistant
down	ENSG00000261978.1	-1.18151	-0.521026	0.000395749	0.0111079	2.45	1.74	1.51	1.58	0.59	0.41	CTD-2529O21.2	chr17	antisense	--
down	ENSG00000127129.9	-1.80554	-2.03151	0.00243825	0.0439926	0.28	0.15	0.19	0.02	0.07	0.09	EDN2	chr1	protein_coding	endothelin 2
down	ENSG00000261040.6	-2.78134	-1.70706	5.90605e-07	4.77835e-05	0.64	0.47	0.76	0.17	0	0.09	WFDC21P	chr17	processed_transcript	WAP four-disulfide core domain 21, pseudogene
down	ENSG00000188257.10	-1.5969	7.92883	7.05152e-17	6.42663e-14	325.48	289.28	339.48	122.34	111.32	91.67	PLA2G2A	chr1	protein_coding	phospholipase A2, group IIA (platelets, synovial fluid)
down	ENSG00000233072.1	-2.39279	-2.37278	0.000961284	0.0216434	0.42	1.11	0	0.21	0	0.07	RPS15AP6	chr1	processed_pseudogene	ribosomal protein S15a pseudogene 6
down	ENSG00000174992.7	-1.42048	-1.15554	0.00057711	0.0147742	0.18	0.14	0.17	0.1	0.03	0.06	ZG16	chr16	protein_coding	zymogen granule protein 16
down	ENSG00000165637.13	-1.04018	7.87814	3.58117e-08	4.30115e-06	163.34	146.86	162.81	90.01	84.51	62.95	VDAC2	chr10	protein_coding	voltage-dependent anion channel 2
down	ENSG00000132698.13	-1.71516	-0.196409	6.20011e-08	6.83711e-06	0.92	1.01	1.1	0.49	0.29	0.15	RAB25	chr1	protein_coding	RAB25, member RAS oncogene family
down	ENSG00000205639.9	-1.43765	0.981357	7.55694e-09	1.07416e-06	0.79	0.94	0.88	0.29	0.34	0.37	MFSD2B	chr2	protein_coding	major facilitator superfamily domain containing 2B
down	ENSG00000107984.9	-1.00486	9.60986	9.46969e-08	9.78647e-06	540.86	473.94	547.3	307.02	286.78	210.02	DKK1	chr10	protein_coding	dickkopf WNT signaling pathway inhibitor 1
down	ENSG00000130649.9	-1.15864	1.29787	9.16465e-07	6.90961e-05	1.23	1.67	1.77	0.69	0.67	0.79	CYP2E1	chr10	protein_coding	cytochrome P450, family 2, subfamily E, polypeptide 1
down	ENSG00000054938.15	-4.81484	-3.15762	0.00233862	0.0427029	0.08	0	0.06	0	0	0	CHRDL2	chr11	protein_coding	chordin-like 2
down	ENSG00000178934.4	-1.47369	-1.531	0.00215931	0.0403319	1.11	0.67	0.56	0.51	0.17	0.18	LGALS7B	chr19	protein_coding	lectin, galactoside-binding, soluble, 7B
down	ENSG00000068985.4	-1.08737	0.733053	2.29993e-05	0.00111182	3.14	2.74	2.92	1.28	1.18	1.8	PAGE1	chrX	protein_coding	P antigen family, member 1 (prostate associated)
down	ENSG00000242220.6	-2.14887	-1.68897	4.79274e-05	0.00202333	0.15	0.19	0.07	0.07	0.01	0.01	TCP10L	chr21	protein_coding	t-complex 10-like
down	ENSG00000237390.1	-1.18022	-0.731832	0.00108768	0.0237941	0.13	0.12	0.12	0.05	0.04	0.07	RP11-139I14.2	chr1	lincRNA	--
down	ENSG00000146904.8	-1.01934	3.20792	4.06165e-07	3.48638e-05	3.34	3.38	3.08	1.66	1.6	1.71	EPHA1	chr7	protein_coding	EPH receptor A1
down	ENSG00000170909.13	-1.15226	-0.126669	0.000146575	0.00508614	0.6	0.57	0.34	0.26	0.21	0.23	OSCAR	chr19	protein_coding	osteoclast associated, immunoglobulin-like receptor
down	ENSG00000132692.18	-1.18252	-0.945799	0.00138477	0.0286639	0.13	0.17	0.12	0.05	0.09	0.06	BCAN	chr1	protein_coding	brevican
down	ENSG00000101323.4	-3.69971	-2.71122	0.000231674	0.00726606	0.09	0.11	0.07	0	0.02	0	HAO1	chr20	protein_coding	hydroxyacid oxidase (glycolate oxidase) 1
down	ENSG00000166961.14	-3.5136	-2.2974	8.56748e-06	0.000474921	0.2	0.13	0.05	0	0.03	0	MS4A15	chr11	protein_coding	membrane-spanning 4-domains, subfamily A, member 15
down	ENSG00000197635.9	-1.76172	-1.70998	0.000713517	0.017384	0.05	0.13	0.08	0.02	0.03	0.03	DPP4	chr2	protein_coding	dipeptidyl-peptidase 4
down	ENSG00000152137.6	-1.01192	3.59246	3.28567e-07	2.87607e-05	6.57	5.95	7.5	3.83	3.83	2.58	HSPB8	chr12	protein_coding	heat shock 22kDa protein 8
down	ENSG00000142677.3	-1.04933	4.89256	4.79467e-08	5.50269e-06	11.31	13.85	13.17	6.22	6.67	6.16	IL22RA1	chr1	protein_coding	interleukin 22 receptor, alpha 1
down	ENSG00000167711.13	-1.04285	7.75692	3.3378e-08	4.07199e-06	108.84	113.99	109.69	61.75	53.4	51.05	SERPINF2	chr17	protein_coding	serpin peptidase inhibitor, clade F (alpha-2 antiplasmin, pigment epithelium derived factor), member 2
down	ENSG00000079308.16	-1.00108	1.20448	2.59581e-05	0.00122017	0.21	0.31	0.2	0.11	0.12	0.14	TNS1	chr2	protein_coding	tensin 1
down	ENSG00000125735.10	-1.29244	-0.549813	0.000123259	0.00443604	0.12	0.22	0.16	0.08	0.06	0.07	TNFSF14	chr19	protein_coding	tumor necrosis factor (ligand) superfamily, member 14
down	ENSG00000101160.13	-1.74811	-1.6199	0.000485395	0.0130337	0.09	0.5	0.14	0.07	0.09	0.06	CTSZ	chr20	protein_coding	cathepsin Z
down	ENSG00000105668.7	-1.39896	-1.06119	0.000309968	0.00915632	0.41	0.31	0.48	0.16	0.22	0.08	UPK1A	chr19	protein_coding	uroplakin 1A
down	ENSG00000278996.1	-2.15096	-1.4524	8.24286e-06	0.000460219	0.02	0.48	0.02	0.05	0.02	0.05	CH507-513H4.1	chr21	lincRNA	--
down	ENSG00000150054.18	-1.00818	1.53115	1.09836e-05	0.000584792	0.78	0.62	0.55	0.42	0.21	0.37	MPP7	chr10	protein_coding	membrane protein, palmitoylated 7 (MAGUK p55 subfamily member 7)
down	ENSG00000111181.12	-1.49326	1.57526	9.9077e-11	2.32583e-08	1.02	0.95	1.07	0.43	0.44	0.24	SLC6A12	chr12	protein_coding	solute carrier family 6 (neurotransmitter transporter), member 12
down	ENSG00000172889.15	-1.09684	1.91735	5.4948e-07	4.46896e-05	1.76	1.61	1.97	0.78	0.97	0.81	EGFL7	chr9	protein_coding	EGF-like-domain, multiple 7
down	ENSG00000214049.6	-1.51922	1.23304	3.01443e-10	6.39782e-08	1.37	1.06	1.55	0.46	0.6	0.36	UCA1	chr19	processed_transcript	urothelial cancer associated 1 (non-protein coding)
down	ENSG00000159625.14	-3.39541	-1.9991	4.03836e-07	3.47601e-05	0.09	0.09	0.14	0.01	0	0.02	DRC7	chr16	protein_coding	dynein regulatory complex subunit 7
down	ENSG00000110195.11	-2.67006	-1.61425	5.1919e-07	4.25612e-05	0.2	0.27	0.32	0.07	0.02	0.04	FOLR1	chr11	protein_coding	folate receptor 1 (adult)
down	ENSG00000141540.10	-1.03099	-0.061248	0.000515038	0.0135135	0.3	0.18	0.22	0.11	0.13	0.11	TTYH2	chr17	protein_coding	tweety family member 2
down	ENSG00000273551.1	-1.87344	-1.86364	0.000745339	0.0178622	0.86	0.55	0.28	0.05	0.2	0.21	RP11-616M22.11	chr16	lincRNA	--
down	ENSG00000149043.16	-1.383	1.83977	7.13362e-10	1.38156e-07	2.23	2.92	2.83	0.78	1.04	1.31	SYT8	chr11	protein_coding	synaptotagmin VIII
down	ENSG00000172239.13	-1.94529	5.8121	1.95542e-23	3.78703e-20	26.83	22.96	26.01	8.29	6.54	5.47	PAIP1	chr5	protein_coding	poly(A) binding protein interacting protein 1
down	ENSG00000206075.13	-1.83651	-1.89051	0.00109298	0.0238172	0.08	0.1	0.08	0.01	0.06	0.01	SERPINB5	chr18	protein_coding	serpin peptidase inhibitor, clade B (ovalbumin), member 5
down	ENSG00000100593.17	-1.02866	4.89176	8.65427e-08	9.0905e-06	11.04	12.13	12.74	5.76	6.21	6.12	ISM2	chr14	protein_coding	isthmin 2
down	ENSG00000187134.12	-1.37739	9.65058	4.0313e-13	1.58124e-10	146.17	117.33	172.13	68.26	61.19	43.7	AKR1C1	chr10	protein_coding	aldo-keto reductase family 1, member C1
down	ENSG00000134962.6	-1.08154	4.41444	2.39411e-08	3.02701e-06	4.14	4.28	4.33	2.57	2.02	1.61	KLB	chr4	protein_coding	klotho beta
down	ENSG00000162366.7	-1.61126	-0.0384266	1.31597e-07	1.31542e-05	1.37	0.88	0.85	0.51	0.25	0.29	PDZK1IP1	chr1	protein_coding	PDZK1 interacting protein 1
down	ENSG00000167800.9	-1.17755	1.92716	8.53291e-08	9.0242e-06	2.96	2.72	3.34	1.36	1.3	1.43	TBX10	chr11	protein_coding	T-box 10
down	ENSG00000123342.15	-2.29137	-1.15447	1.80165e-07	1.73378e-05	0.22	0.26	0.27	0.06	0.03	0.06	MMP19	chr12	protein_coding	matrix metallopeptidase 19
down	ENSG00000136689.18	-1.61545	3.79113	7.65017e-16	5.78185e-13	8.24	8.34	7.54	3.21	2.66	2.24	IL1RN	chr2	protein_coding	interleukin 1 receptor antagonist
down	ENSG00000179546.4	-1.24833	-0.193331	4.76218e-05	0.00201592	0.25	0.43	0.42	0.14	0.11	0.21	HTR1D	chr1	protein_coding	5-hydroxytryptamine (serotonin) receptor 1D, G protein-coupled
down	ENSG00000232010.1	-1.83526	-1.22456	1.09807e-05	0.000584792	1.02	0.92	1.03	0.21	0.52	0.11	AP001059.5	chr21	antisense	--
down	ENSG00000167772.11	-1.34708	0.504612	4.91017e-07	4.06822e-05	0.78	1	1.02	0.42	0.46	0.24	ANGPTL4	chr19	protein_coding	angiopoietin-like 4
up	ENSG00000185710.9	2.229	-1.85884	5.92433e-05	0.00241867	0.02	0.01	0.01	0.03	0.02	0.15	SMG1P4	chr16	transcribed_unprocessed_pseudogene	SMG1 pseudogene 4
up	ENSG00000202198.1	2.48004	3.9162	6.41224e-33	2.4837e-29	13.43	14.89	8.58	11.34	48.81	148.72	RN7SK	chr6	misc_RNA	RNA, 7SK small nuclear
up	ENSG00000184986.10	1.13532	-0.00666515	0.000114828	0.00420092	0.26	0.32	0.42	0.68	0.85	0.72	TMEM121	chr14	protein_coding	transmembrane protein 121
up	ENSG00000054654.15	1.16183	4.20755	2.52112e-09	3.94555e-07	0.39	0.49	0.38	0.4	0.54	1.91	SYNE2	chr14	protein_coding	spectrin repeat containing, nuclear envelope 2
up	ENSG00000185386.14	1.71833	1.97387	2.19272e-14	1.0959e-11	0.58	0.78	0.61	2.1	2.06	2.55	MAPK11	chr22	protein_coding	mitogen-activated protein kinase 11
up	ENSG00000274012.1	3.23848	4.99486	9.0701e-54	1.40528e-49	14.01	28.03	12.36	15.25	50.06	449.85	Metazoa_SRP	chr14	misc_RNA	--
up	ENSG00000249395.2	1.09003	-0.778258	0.00263956	0.0466051	0.41	0.14	0.21	0.61	0.65	0.42	CASC9	chr8	lincRNA	cancer susceptibility candidate 9 (non-protein coding)
up	ENSG00000228327.2	2.47112	0.0250345	1.86512e-14	9.63243e-12	0.22	0.2	0.16	0.08	0.25	3.05	RP11-206L10.2	chr1	lincRNA	--
up	ENSG00000164037.16	2.10549	-2.09578	0.000463019	0.0125416	0.01	0.01	0.06	0.11	0.13	0.12	SLC9B1	chr4	protein_coding	solute carrier family 9, subfamily B (NHA1, cation proton antiporter 1), member 1
up	ENSG00000280355.1	1.11713	-0.64876	0.000934308	0.0211943	0.16	0.18	0.11	0.22	0.2	0.6	RP11-119F19.5	chr10	TEC	--
up	ENSG00000088367.20	1.28712	7.2689	1.27011e-11	3.45236e-09	11.6	12.19	11.01	26.42	28.65	32.17	EPB41L1	chr20	protein_coding	erythrocyte membrane protein band 4.1-like 1
up	ENSG00000203814.6	2.46969	-1.28789	6.52976e-08	7.14974e-06	0.02	0.06	0.02	0.04	0.06	0.54	HIST2H2BF	chr1	protein_coding	histone cluster 2, H2bf
up	ENSG00000122861.15	1.45406	1.08934	3.18975e-09	4.86901e-07	0.45	0.23	0.42	1.16	1	0.94	PLAU	chr10	protein_coding	plasminogen activator, urokinase
up	ENSG00000003137.8	1.09097	-0.738894	0.00241831	0.043711	0.09	0.04	0.05	0.1	0.17	0.15	CYP26B1	chr2	protein_coding	cytochrome P450, family 26, subfamily B, polypeptide 1
up	ENSG00000248208.1	4.76961	-3.15883	0.00233862	0.0427029	0	0	0	0	0.1	0.16	RP11-153M7.1	chr4	processed_pseudogene	--
up	ENSG00000163638.13	3.24496	-2.91657	0.0023821	0.0431914	0	0	0	0	0.01	0.03	ADAMTS9	chr3	protein_coding	ADAM metallopeptidase with thrombospondin type 1 motif, 9
up	ENSG00000145391.13	2.04721	1.31604	1.53831e-16	1.28831e-13	0.05	0.07	0.06	0.25	0.28	0.24	SETD7	chr4	protein_coding	SET domain containing (lysine methyltransferase) 7
up	ENSG00000188559.13	1.26137	3.23747	4.61455e-10	9.10771e-08	0.66	0.98	0.77	0.65	0.78	4.4	RALGAPA2	chr20	protein_coding	Ral GTPase activating protein, alpha subunit 2 (catalytic)
up	ENSG00000187951.10	1.19462	1.73116	8.59576e-08	9.05976e-06	0.66	1.19	0.75	0.98	0.96	4.12	ARHGAP11B	chr15	protein_coding	Rho GTPase activating protein 11B
up	ENSG00000240618.1	2.42576	-0.908773	2.04908e-09	3.30702e-07	0.45	0.54	0.3	0.74	0.92	5.79	RP11-206L10.5	chr1	lincRNA	--
up	ENSG00000130635.15	1.74395	-1.3856	8.35276e-05	0.00322325	0.02	0.01	0.02	0.01	0.04	0.1	COL5A1	chr9	protein_coding	collagen, type V, alpha 1
up	ENSG00000198440.9	1.14238	0.499785	2.2691e-05	0.00110208	0.15	0.13	0.17	0.32	0.41	0.3	ZNF583	chr19	protein_coding	zinc finger protein 583
up	ENSG00000242085.1	1.21307	-1.17666	0.00275783	0.0480905	0.38	0.91	0.42	1.47	1	1.69	RPS20P33	chr14	processed_pseudogene	ribosomal protein S20 pseudogene 33
up	ENSG00000229127.1	1.18208	-0.761093	0.00117575	0.0252256	0.1	0.16	0.14	0.31	0.25	0.36	AC007038.7	chr2	antisense	--
up	ENSG00000273167.1	3.14032	0.0558475	2.93516e-20	3.49814e-17	0.02	0.08	0.03	0.05	0.05	1.06	RP11-307N16.6	chr13	protein_coding	--
up	ENSG00000130643.8	1.58661	-0.877664	4.04458e-05	0.0017652	0.06	0.07	0.08	0.14	0.25	0.29	CALY	chr10	protein_coding	calcyon neuron-specific vesicular protein
up	ENSG00000178502.5	2.20439	-1.06757	2.45231e-07	2.24822e-05	0.03	0.04	0.09	0.05	0.08	0.67	KLHL11	chr17	protein_coding	kelch-like family member 11
up	ENSG00000124557.12	1.47318	-0.446272	1.18005e-05	0.000621877	0.12	0.07	0.13	0.39	0.37	0.18	BTN1A1	chr6	protein_coding	butyrophilin, subfamily 1, member A1
up	ENSG00000198482.10	1.09321	0.571636	2.87756e-05	0.00132099	0.27	0.19	0.14	0.27	0.19	0.86	ZNF808	chr19	protein_coding	zinc finger protein 808
up	ENSG00000235370.6	2.59785	-1.61043	5.1919e-07	4.25612e-05	0	0.02	0	0.01	0.01	0.13	DNM1P51	chr15	transcribed_unprocessed_pseudogene	dynamin 1 pseudogene 51
up	ENSG00000270964.1	1.1667	-0.0612874	9.2117e-05	0.00348727	0.35	0.24	0.37	0.86	0.78	0.59	RP11-502I4.3	chr15	lincRNA	--
up	ENSG00000066230.10	1.33431	-0.798114	0.000174074	0.00575058	0.07	0.16	0.07	0.22	0.19	0.37	SLC9A3	chr5	protein_coding	solute carrier family 9, subfamily A (NHE3, cation proton antiporter 3), member 3
up	ENSG00000280006.1	1.30295	-0.778024	0.000212717	0.00678833	0.7	1.12	0.24	0.29	0.85	4.26	AC009060.2	chr16	protein_coding	--
up	ENSG00000135052.16	1.80319	1.66094	9.41963e-15	5.30702e-12	0.38	0.4	0.39	1.27	1.36	1.55	GOLM1	chr9	protein_coding	golgi membrane protein 1
up	ENSG00000260774.1	1.08341	-0.77787	0.00263956	0.0466051	0.07	0.08	0.16	0.13	0.12	0.42	CTD-2083E4.4	chr5	processed_transcript	--
up	ENSG00000198198.13	1.39371	4.89208	6.27099e-13	2.28611e-10	1.02	1.26	1.09	1.24	1.4	6.31	SZT2	chr1	protein_coding	seizure threshold 2 homolog (mouse)
up	ENSG00000188766.12	1.1159	0.971893	4.76973e-06	0.000286397	0.17	0.27	0.17	0.33	0.37	0.65	SPRED3	chr19	protein_coding	sprouty-related, EVH1 domain containing 3
up	ENSG00000248905.8	1.37975	-0.960396	0.000448122	0.0122128	0.01	0.01	0.01	0.02	0.04	0.04	FMN1	chr15	protein_coding	formin 1
up	ENSG00000272986.1	1.15507	-0.512972	0.000567034	0.0145694	0.29	0.61	0.52	1.18	1.06	1.03	RP11-46J23.1	chr4	antisense	--
up	ENSG00000207551.1	5.14254	-2.97124	0.000332393	0.00958128	0	0	0	0	0	3.7	MIR608	chr10	miRNA	microRNA 608
up	ENSG00000235669.1	1.63017	-1.02438	3.17507e-05	0.00142795	0.23	0.23	0.22	0.93	0.82	0.5	AC004593.3	chr7	antisense	--
up	ENSG00000236209.1	1.26496	-1.14147	0.00193789	0.0371363	0.21	0.28	0.31	0.54	0.53	0.93	AC104135.2	chr2	lincRNA	--
up	ENSG00000188389.10	1.27259	-0.467976	0.000133164	0.0046837	0.11	0.14	0.24	0.27	0.45	0.5	PDCD1	chr2	protein_coding	programmed cell death 1
up	ENSG00000255176.1	2.63177	-2.44389	0.000500014	0.0132427	0.06	0	0	0	0.02	0.41	AP002954.3	chr11	antisense	--
up	ENSG00000109265.12	1.82061	1.41907	3.02147e-14	1.46291e-11	0.19	0.21	0.23	0.27	0.35	1.63	KIAA1211	chr4	protein_coding	KIAA1211
up	ENSG00000117122.13	1.37591	1.7334	1.25056e-09	2.14094e-07	1.51	1.11	1.23	3.52	3.74	3.05	MFAP2	chr1	protein_coding	microfibrillar-associated protein 2
up	ENSG00000010818.8	1.15689	2.71472	2.32209e-08	2.96109e-06	0.34	0.37	0.41	0.59	0.63	1.31	HIVEP2	chr6	protein_coding	human immunodeficiency virus type I enhancer binding protein 2
up	ENSG00000180229.12	2.10663	0.582112	3.53057e-14	1.60885e-11	0.05	0.06	0.06	0.07	0.09	0.61	HERC2P3	chr15	transcribed_unprocessed_pseudogene	hect domain and RLD 2 pseudogene 3
up	ENSG00000231298.6	1.22622	1.63408	7.53916e-08	8.0836e-06	0.85	0.71	0.98	2.14	2.36	1.63	LINC00704	chr10	lincRNA	long intergenic non-protein coding RNA 704
up	ENSG00000183458.13	1.14036	3.92156	6.20688e-09	8.9457e-07	1.04	1.39	1.27	1.16	1.16	5.91	RP11-958N24.1	chr16	transcribed_unprocessed_pseudogene	--
up	ENSG00000184497.12	1.02826	0.122696	0.000278393	0.00842438	0.06	0.11	0.11	0.15	0.12	0.33	TMEM255B	chr13	protein_coding	transmembrane protein 255B
up	ENSG00000279777.1	1.40854	-0.893406	0.000117976	0.00428072	0.21	1	0.64	0.44	0.43	4.25	AC004813.1	chr12	protein_coding	--
up	ENSG00000149639.14	1.17868	5.6752	6.90719e-10	1.35436e-07	1.85	2.18	1.69	3.08	2.98	7.11	SOGA1	chr20	protein_coding	suppressor of glucose, autophagy associated 1
up	ENSG00000186326.3	3.19092	-2.45178	7.42678e-05	0.00293913	0	0.02	0	0.12	0.05	0.04	RGS9BP	chr19	protein_coding	regulator of G protein signaling 9 binding protein
up	ENSG00000169884.13	2.00117	-1.30044	6.81495e-06	0.000389731	0.06	0.05	0.05	0.16	0.3	0.21	WNT10B	chr12	protein_coding	wingless-type MMTV integration site family, member 10B
up	ENSG00000225840.2	1.67342	1.6742	3.46784e-13	1.37767e-10	0.41	1.2	0.55	0.34	1.48	5.2	AC010970.2	chrY	processed_pseudogene	--
up	ENSG00000244480.1	2.05421	-1.96944	0.000321429	0.00938749	0.06	0.02	0.06	0.06	0.08	0.49	AC005154.7	chr7	transcribed_processed_pseudogene	--
up	ENSG00000270617.1	1.83692	-0.360144	4.25415e-08	4.99331e-06	0.37	0.27	0.41	0.52	0.65	2.72	URGCP-MRPS24	chr7	protein_coding	URGCP-MRPS24 readthrough
up	ENSG00000259726.1	1.72379	-0.43756	3.43231e-07	2.97919e-05	0.02	0.06	0.09	0.04	0.13	0.41	CSPG4P11	chr15	unprocessed_pseudogene	chondroitin sulfate proteoglycan 4 pseudogene 11
up	ENSG00000198483.12	2.2127	-1.86725	9.06485e-05	0.0034425	0.04	0	0.02	0.11	0.1	0.07	ANKRD35	chr1	protein_coding	ankyrin repeat domain 35
up	ENSG00000198106.8	1.58086	1.14604	1.14602e-10	2.63051e-08	0.2	0.21	0.19	0.31	0.26	1.26	SNX29P2	chr16	lincRNA	sorting nexin 29 pseudogene 2
up	ENSG00000171680.20	1.03019	2.98469	4.12664e-07	3.51297e-05	0.59	0.76	0.93	1.07	1.18	2.49	PLEKHG5	chr1	protein_coding	pleckstrin homology domain containing, family G (with RhoGef domain) member 5
up	ENSG00000257803.2	2.75247	-2.70713	0.00187951	0.0363095	0	0.02	0.02	0	0	0.31	RP11-575G13.2	chr12	processed_pseudogene	--
up	ENSG00000279759.1	1.73431	0.681664	5.97025e-11	1.45669e-08	0.12	0.19	0.09	0.08	0.08	1.2	CTC-425O23.5	chr19	TEC	--
up	ENSG00000234709.2	2.8344	-2.66287	0.00110024	0.0238579	0	0.07	0	0.04	0.14	0.44	UPF3AP3	chr9	transcribed_processed_pseudogene	UPF3A pseudogene 3
up	ENSG00000100101.15	1.31245	0.169093	4.17919e-06	0.000254922	0.1	0.16	0.07	0.09	0.11	0.64	RP1-37E16.12	chr22	protein_coding	--
up	ENSG00000179627.9	1.13395	3.05358	2.47615e-08	3.09389e-06	1.09	1.16	1.29	2.24	2.6	3.14	ZBTB42	chr14	protein_coding	zinc finger and BTB domain containing 42
up	ENSG00000182310.12	2.01349	-2.15502	0.00109796	0.0238579	0.04	0.11	0.08	0.11	0.11	0.79	SPACA6P	chr19	processed_transcript	sperm acrosome associated 6, pseudogene
up	ENSG00000260063.1	1.4459	-1.14685	0.000344206	0.00987584	0.09	0.11	0.07	0.34	0.23	0.21	RP5-968P14.2	chr1	antisense	--
up	ENSG00000136378.14	1.54074	0.336032	3.54135e-08	4.26988e-06	0.12	0.08	0.1	0.28	0.22	0.39	ADAMTS7	chr15	protein_coding	ADAM metallopeptidase with thrombospondin type 1 motif, 7
up	ENSG00000170776.19	1.08322	5.05974	1.66156e-08	2.20285e-06	1.14	1.14	1.15	1.46	1.6	4.32	AKAP13	chr15	protein_coding	A kinase (PRKA) anchor protein 13
up	ENSG00000277352.1	1.28929	-0.32616	5.80858e-05	0.00238714	0.79	0.33	0.65	1.23	0.63	2.6	KB-68A7.2	chr21	lincRNA	--
up	ENSG00000279165.1	1.20638	-0.877365	0.0010011	0.0223335	0.08	0.2	0.13	0.22	0.33	0.43	CTD-2144E22.9	chr16	TEC	--
up	ENSG00000243107.1	5.43627	-2.80698	4.87919e-05	0.00205144	0	0	0	0	0	0.29	AC000120.7	chr7	sense_overlapping	--
up	ENSG00000184922.13	2.53171	1.36205	3.98618e-23	7.26588e-20	0.15	0.15	0.16	0.77	0.83	1.22	FMNL1	chr17	protein_coding	formin-like 1
up	ENSG00000154358.19	1.11699	1.41512	1.19557e-06	8.62003e-05	0.05	0.06	0.05	0.04	0.04	0.26	OBSCN	chr1	protein_coding	obscurin, cytoskeletal calmodulin and titin-interacting RhoGEF
up	ENSG00000267426.5	2.33785	-1.16032	1.03229e-07	1.05569e-05	0.19	0.24	0.16	0.9	0.94	1.4	RP11-552F3.12	chr17	protein_coding	--
up	ENSG00000214279.12	1.56538	-1.06893	0.000102706	0.00383439	0.11	0.34	0.34	0.16	0.27	2.04	SCART1	chr10	unitary_pseudogene	--
up	ENSG00000279007.1	1.58861	0.0216619	7.34598e-08	7.93136e-06	0.29	2.36	0.72	0.66	0.51	9.33	FKSG56	chr9	protein_coding	--
up	ENSG00000205542.10	1.07769	3.38474	7.91684e-08	8.45928e-06	3.44	2.69	4.38	7.29	8.79	6.74	TMSB4X	chrX	protein_coding	thymosin beta 4, X-linked
up	ENSG00000277011.1	1.13245	-0.0855165	0.000159076	0.00536959	0.16	0.34	0.32	0.6	0.45	0.81	RP13-895J2.6	chr12	lincRNA	--
up	ENSG00000280205.1	4.92852	-1.8276	1.07771e-10	2.49563e-08	0	0.01	0	0	0.01	0.31	RP11-504I13.2	chr18	TEC	--
up	ENSG00000238132.2	1.88991	-2.22697	0.00257159	0.0456915	0.04	0.04	0.05	0.06	0.23	0.22	CASC4P1	chr13	processed_pseudogene	cancer susceptibility candidate 4 pseudogene 1
up	ENSG00000188211.8	1.90497	2.58542	9.6254e-19	9.94208e-16	0.35	0.42	0.28	0.32	0.4	3.22	NCR3LG1	chr11	protein_coding	natural killer cell cytotoxicity receptor 3 ligand 1
up	ENSG00000184619.3	1.49389	-0.0386851	7.7797e-07	5.98188e-05	0.15	0.17	0.13	0.17	0.24	0.92	KRBA2	chr17	protein_coding	KRAB-A domain containing 2
up	ENSG00000254694.1	3.45288	-2.80728	0.000742841	0.0178388	0.07	0	0	0	0	1.18	RP11-50B3.4	chr11	antisense	--
up	ENSG00000278195.1	1.68305	-0.609383	1.47274e-06	0.000103015	0.05	0.07	0.04	0.13	0.19	0.23	SSTR3	chr22	protein_coding	somatostatin receptor 3
up	ENSG00000188064.9	1.40384	1.61799	1.04289e-09	1.83613e-07	0.33	0.25	0.28	0.61	0.93	0.84	WNT7B	chr22	protein_coding	wingless-type MMTV integration site family, member 7B
up	ENSG00000186973.10	1.01351	0.410591	0.000172174	0.00571829	0.85	1.65	1.04	3.12	2.65	1.62	FAM183A	chr1	protein_coding	family with sequence similarity 183, member A
up	ENSG00000135625.7	2.15063	-1.76203	4.36522e-05	0.00187608	0	0.06	0.04	0.13	0.15	0.17	EGR4	chr2	protein_coding	early growth response 4
up	ENSG00000174501.14	1.27338	0.982556	1.91964e-07	1.81908e-05	0.2	0.23	0.08	0.21	0.23	0.81	ANKRD36C	chr2	protein_coding	ankyrin repeat domain 36C
up	ENSG00000261143.1	2.40446	-2.57193	0.00224924	0.0415854	0.01	0	0.02	0.04	0.01	0.08	ADAMTS7P3	chr15	transcribed_unprocessed_pseudogene	ADAMTS7 pseudogene 3
up	ENSG00000198720.12	1.29223	2.24559	1.9081e-09	3.12838e-07	0.61	0.9	0.75	1.82	1.78	2.09	ANKRD13B	chr17	protein_coding	ankyrin repeat domain 13B
up	ENSG00000168916.15	1.28306	1.05168	1.72294e-07	1.67889e-05	0.15	0.21	0.17	0.29	0.35	0.68	ZNF608	chr5	protein_coding	zinc finger protein 608
up	ENSG00000280138.1	1.07143	1.32904	3.97352e-06	0.000244301	0.06	0.1	0.07	0.07	0.06	0.36	RP11-463O12.5	chr12	TEC	--
up	ENSG00000213693.4	1.73743	-1.22971	4.32393e-05	0.00186195	0.05	0.1	0.05	0.15	0.31	0.25	SEC14L1P1	chr11	processed_pseudogene	SEC14-like 1 pseudogene 1
up	ENSG00000269900.3	2.19875	2.71523	3.88605e-24	8.0278e-21	5.8	11.49	5.91	7.26	28.62	72.62	RMRP	chr9	lincRNA	RNA component of mitochondrial RNA processing endoribonuclease
up	ENSG00000268750.6	3.71194	-2.65975	0.00012949	0.00460149	0	0.04	0	0	0	0.85	CTD-2583A14.10	chr19	protein_coding	--
up	ENSG00000100106.19	1.32708	5.32104	5.3619e-12	1.59759e-09	1.81	1.72	1.89	4.42	4.9	4.67	TRIOBP	chr22	protein_coding	TRIO and F-actin binding protein
up	ENSG00000271798.1	2.17243	-2.05818	0.000299544	0.00891639	0.2	0.61	0.45	0.42	0.41	5.39	SNORA51	chr20	snoRNA	small nucleolar RNA, H/ACA box 51
up	ENSG00000273706.4	2.82974	-2.66293	0.00110024	0.0238579	0	0	0.02	0.01	0.05	0.08	LHX1	chr17	protein_coding	LIM homeobox 1
up	ENSG00000167874.6	1.02944	-0.126672	0.000619953	0.0156098	0.52	0.58	0.61	1.35	0.87	1.4	TMEM88	chr17	protein_coding	transmembrane protein 88
up	ENSG00000255624.2	1.42657	-0.781598	8.36639e-05	0.00322449	0.26	0.16	0.14	0.5	0.78	0.3	RP11-564D11.3	chr10	transcribed_processed_pseudogene	--
up	ENSG00000185038.14	1.91147	1.52777	9.72684e-16	6.81023e-13	0.22	0.15	0.2	0.5	0.6	1.12	MROH2A	chr2	protein_coding	maestro heat-like repeat family member 2A
up	ENSG00000226026.5	2.48034	-2.52935	0.001366	0.0283322	0	0.01	0.02	0.06	0.03	0.13	RP11-57H12.3	chr1	antisense	--
up	ENSG00000099338.22	1.78772	0.232082	8.21001e-10	1.55122e-07	0.14	0.11	0.11	0.24	0.32	0.71	CATSPERG	chr19	protein_coding	catsper channel auxiliary subunit gamma
up	ENSG00000232063.1	2.60559	-1.96827	1.69164e-05	0.000853727	0.04	0.01	0.01	0.03	0.03	0.38	RP11-307E17.8	chr9	lincRNA	--
up	ENSG00000260596.5	6.12951	-2.36395	5.56352e-08	6.26898e-06	0	0	0	0	0	0.43	DUX4	chr4	protein_coding	double homeobox 4
up	ENSG00000205041.1	2.08907	-1.06615	7.74791e-07	5.98188e-05	0.04	0.11	0.14	0.06	0.07	1.15	CTC-425O23.2	chr19	sense_intronic	--
up	ENSG00000078487.17	1.01677	1.03164	3.35194e-05	0.00149664	0.4	0.46	0.57	0.93	0.94	1.08	ZCWPW1	chr7	protein_coding	zinc finger, CW type with PWWP domain 1
up	ENSG00000280248.1	2.28749	-1.54238	2.87538e-06	0.000187577	0.01	0.09	0.01	0.01	0	0.59	CTD-2047H16.3	chr17	TEC	--
up	ENSG00000138400.12	1.16652	-0.818889	0.00109038	0.0237941	0.1	0.18	0.04	0.29	0.29	0.18	MDH1B	chr2	protein_coding	malate dehydrogenase 1B, NAD (soluble)
up	ENSG00000143127.12	1.4321	0.114741	9.80954e-07	7.32454e-05	0.1	0.08	0.1	0.21	0.26	0.31	ITGA10	chr1	protein_coding	integrin, alpha 10
up	ENSG00000276168.1	2.85248	5.12536	6.06764e-44	4.70045e-40	21.4	32.96	21.59	25.66	85.94	440.22	RN7SL1	chr14	misc_RNA	RNA, 7SL, cytoplasmic 1
up	ENSG00000101098.12	1.24415	-0.493476	0.00020652	0.00662467	0.08	0.07	0.05	0.07	0.23	0.17	RIMS4	chr20	protein_coding	regulating synaptic membrane exocytosis 4
up	ENSG00000223823.1	2.06281	-0.604822	7.04464e-09	1.00596e-06	0.05	0.21	0.11	0.07	0.17	1.41	LINC01342	chr1	lincRNA	long intergenic non-protein coding RNA 1342
up	ENSG00000266498.1	3.24897	-2.9157	0.0023821	0.0431914	0	0.04	0	0.08	0	0.46	RP11-45M22.5	chr17	lincRNA	--
up	ENSG00000161791.13	1.70531	0.0867538	1.3093e-08	1.78728e-06	0.04	0.03	0.03	0.08	0.12	0.14	FMNL3	chr12	protein_coding	formin-like 3
up	ENSG00000214081.7	1.70512	-0.979773	9.36804e-06	0.000513783	0.05	0.09	0.04	0.07	0.04	0.5	CYP4F30P	chr2	transcribed_unprocessed_pseudogene	cytochrome P450, family 4, subfamily F, polypeptide 30, pseudogene
up	ENSG00000279948.1	1.75062	-1.22052	3.10841e-05	0.00140614	0.03	0.07	0.07	0.09	0.1	0.4	CTD-2233K9.1	chr19	TEC	--
up	ENSG00000196787.3	1.01993	0.179765	0.000278252	0.00842438	0.27	0.25	0.32	0.5	0.42	0.83	HIST1H2AG	chr6	protein_coding	histone cluster 1, H2ag
up	ENSG00000167889.12	1.64601	-1.946	0.00232853	0.0427029	0.02	0	0.04	0.03	0.08	0.06	MGAT5B	chr17	protein_coding	mannosyl (alpha-1,6-)-glycoprotein beta-1,6-N-acetyl-glucosaminyltransferase, isozyme B
up	ENSG00000103021.9	2.07481	-0.778225	4.09306e-08	4.84091e-06	0.05	0.03	0.03	0.1	0.2	0.15	CCDC113	chr16	protein_coding	coiled-coil domain containing 113
up	ENSG00000005884.17	1.04198	3.08595	2.72769e-07	2.43582e-05	0.95	0.97	1.1	1.41	1.99	2.97	ITGA3	chr17	protein_coding	integrin, alpha 3 (antigen CD49C, alpha 3 subunit of VLA-3 receptor)
up	ENSG00000232533.1	1.17594	2.25732	4.23197e-08	4.98617e-06	3.43	3.72	4.84	9.22	11.17	7.51	AC093673.5	chr7	antisense	--
up	ENSG00000184208.10	1.21712	3.68057	8.95673e-10	1.66348e-07	1.36	1.49	1.29	2.14	2.18	5.47	C22orf46	chr22	protein_coding	chromosome 22 open reading frame 46
up	ENSG00000158406.3	1.56396	-1.13457	8.00382e-05	0.00311968	0.4	0.47	0.45	0.55	0.41	3.15	HIST1H4H	chr6	protein_coding	histone cluster 1, H4h
up	ENSG00000278035.1	1.51441	-1.29949	0.000399398	0.0112001	0.42	0.24	0.4	0.92	1.27	0.95	RP11-234K24.6	chr20	lincRNA	--
up	ENSG00000163430.9	3.23817	-2.92118	0.0023821	0.0431914	0	0	0	0.02	0.03	0	FSTL1	chr3	protein_coding	follistatin-like 1
up	ENSG00000177725.5	2.55975	-2.48625	0.000827367	0.01932	0.01	0.02	0	0.03	0.01	0.19	CTD-2530N21.5	chr8	sense_overlapping	--
up	ENSG00000270067.1	2.00066	-2.00434	0.000488118	0.0130503	0.12	0.12	0.04	0.25	0.41	0.6	CTC-487M23.5	chr5	antisense	--
up	ENSG00000178209.14	1.19044	7.19805	3.45962e-10	7.00675e-08	3.94	6.26	4.38	5.12	5.34	23.13	PLEC	chr8	protein_coding	plectin
up	ENSG00000186566.11	1.25021	3.74748	3.00657e-10	6.39782e-08	1.2	1.33	1.25	1.54	1.31	6.27	GPATCH8	chr17	protein_coding	G patch domain containing 8
up	ENSG00000106070.17	1.51397	4.68447	8.3166e-15	4.77234e-12	1.79	1.79	1.96	5.21	5.67	5.37	GRB10	chr7	protein_coding	growth factor receptor-bound protein 10
up	ENSG00000234536.1	5.34207	-2.86108	9.21699e-05	0.00348727	0	0	0	0.21	0	0.88	GTF2IP13	chr7	unprocessed_pseudogene	--
up	ENSG00000239899.3	3.54453	-2.75647	0.000414767	0.0114753	0	0.1	0	0	0	1.66	RN7SL674P	chr2	misc_RNA	RNA, 7SL, cytoplasmic 674, pseudogene
up	ENSG00000189136.8	1.10652	-0.585725	0.000806433	0.019003	0.1	0.47	0.17	0.08	0.22	1.37	UBE2Q2P1	chr15	transcribed_unprocessed_pseudogene	ubiquitin-conjugating enzyme E2Q family member 2 pseudogene 1
up	ENSG00000223459.5	3.01659	-1.1457	1.07921e-10	2.49563e-08	0.01	0.07	0.01	0.01	0.02	0.83	TCAF1P1	chr7	unprocessed_pseudogene	TRPM8 channel-associated factor 1 pseudogene 1
up	ENSG00000231064.5	4.77222	-3.15752	0.00233862	0.0427029	0	0	0	0.02	0.02	0.13	RP11-263K19.4	chr1	antisense	--
up	ENSG00000262652.1	2.20912	-2.22144	0.000668166	0.0165372	0.05	0.18	0	0	0.09	1.1	RP13-638C3.2	chr17	sense_intronic	--
up	ENSG00000161682.14	1.44763	2.39101	1.38191e-11	3.72359e-09	0.82	0.71	0.82	1.8	1.99	2.8	FAM171A2	chr17	protein_coding	family with sequence similarity 171, member A2
up	ENSG00000167972.13	1.85427	1.4238	1.67063e-14	8.92551e-12	0.15	0.13	0.18	0.37	0.54	0.75	ABCA3	chr16	protein_coding	ATP-binding cassette, sub-family A (ABC1), member 3
up	ENSG00000205809.9	1.42273	-0.935355	0.000161542	0.00542328	0.19	0.17	0.11	0.39	0.46	0.47	KLRC2	chr12	protein_coding	killer cell lectin-like receptor subfamily C, member 2
up	ENSG00000131477.10	1.61386	-0.600876	5.82574e-06	0.000338056	0.18	0.18	0.4	0.9	0.91	0.58	RAMP2	chr17	protein_coding	receptor (G protein-coupled) activity modifying protein 2
up	ENSG00000232545.1	3.99725	-2.48424	1.27743e-05	0.000664109	0	0.05	0	0	0.05	1.07	KB-318B8.7	chr22	sense_intronic	--
up	ENSG00000267896.1	1.06587	-0.320161	0.000729482	0.0176874	0.59	0.93	0.82	0.55	0.54	3.95	AC018766.4	chr19	antisense	--
up	ENSG00000188219.14	3.10626	-0.930909	1.48725e-12	4.95543e-10	0.03	0.02	0.01	0.01	0.03	0.52	POTEE	chr2	protein_coding	POTE ankyrin domain family, member E
up	ENSG00000267632.1	1.41259	-1.44284	0.00146542	0.0300722	0.03	0.19	0.03	0.08	0.06	0.57	RP11-400F19.18	chr17	sense_intronic	--
up	ENSG00000235018.1	5.82356	-2.56869	2.1348e-06	0.00014412	0	0	0	0	0	1.13	RP11-11M20.2	chr20	processed_pseudogene	--
up	ENSG00000230068.2	5.82096	-2.57005	2.1348e-06	0.00014412	0	0	0	0.12	0	0.74	CDC42-IT1	chr1	sense_intronic	CDC42 intronic transcript 1
up	ENSG00000276966.1	2.48459	0.084376	6.83487e-15	4.07293e-12	0.51	1.29	0.77	1.49	1.65	11.76	HIST1H4E	chr6	protein_coding	histone cluster 1, H4e
up	ENSG00000117148.7	1.35011	1.70702	2.74679e-09	4.23456e-07	1.02	0.73	0.83	2.23	2.36	2.21	ACTL8	chr1	protein_coding	actin-like 8
up	ENSG00000096433.10	1.06599	7.85869	1.66349e-08	2.20285e-06	12.34	14.85	13.58	16.55	18.52	51.5	ITPR3	chr6	protein_coding	inositol 1,4,5-trisphosphate receptor, type 3
up	ENSG00000172086.7	1.12771	1.93511	3.11866e-07	2.75322e-05	1.24	0.99	1.38	2.67	3.57	1.9	KRCC1	chr2	protein_coding	lysine-rich coiled-coil 1
up	ENSG00000170579.14	2.00192	-2.16216	0.00109796	0.0238579	0	0.01	0	0.06	0.01	0.02	DLGAP1	chr18	protein_coding	discs, large (Drosophila) homolog-associated protein 1
up	ENSG00000279953.1	2.12796	-1.52811	1.09005e-05	0.000582369	0.08	0.09	0.02	0.19	0.13	0.58	RP11-338K17.5	chr12	TEC	--
up	ENSG00000167595.14	1.17394	2.46584	2.40309e-08	3.02701e-06	1.06	1.17	0.94	1.36	1.19	4.71	PROSER3	chr19	protein_coding	proline and serine rich 3
up	ENSG00000128731.15	1.06943	5.17795	2.37288e-08	3.01346e-06	1.2	1.55	1.33	1.4	1.51	5.75	HERC2	chr15	protein_coding	HECT and RLD domain containing E3 ubiquitin protein ligase 2
up	ENSG00000169105.7	1.08486	4.06797	2.79099e-08	3.45937e-06	2.92	2.85	2.25	6.06	6.29	5.21	CHST14	chr15	protein_coding	carbohydrate (N-acetylgalactosamine 4-0) sulfotransferase 14
up	ENSG00000169994.18	1.65762	-0.172165	1.74732e-07	1.69201e-05	0.04	0.05	0.06	0.2	0.15	0.15	MYO7B	chr2	protein_coding	myosin VIIB
up	ENSG00000273329.1	1.1637	1.13218	1.46134e-06	0.000102449	0.22	0.14	0.14	0.28	0.37	0.49	RP11-448A19.1	chr7	lincRNA	--
up	ENSG00000261211.1	4.32396	-2.26361	4.14666e-07	3.52034e-05	0	0	0.01	0.07	0.1	0.07	RP1-80N2.3	chr6	lincRNA	--
up	ENSG00000230606.10	1.46069	0.107737	6.61528e-07	5.21597e-05	0.11	0.14	0.12	0.34	0.3	0.42	AC159540.1	chr2	lincRNA	--
up	ENSG00000135596.17	1.03603	5.29147	6.0758e-08	6.72396e-06	5.06	6	6.35	9.33	10.52	16.63	MICAL1	chr6	protein_coding	microtubule associated monooxygenase, calponin and LIM domain containing 1
up	ENSG00000237440.8	1.83336	-0.196476	1.25438e-08	1.73524e-06	0.07	0.12	0.12	0.21	0.3	0.61	ZNF737	chr19	protein_coding	zinc finger protein 737
up	ENSG00000235333.3	1.11129	0.19264	7.37187e-05	0.00292487	0.44	0.85	0.58	0.45	0.89	2.82	PVRIG2P	chr7	transcribed_unprocessed_pseudogene	poliovirus receptor related immunoglobulin domain containing 2, pseudogene
up	ENSG00000269825.1	2.54613	-0.123498	1.99961e-14	1.01577e-11	0.05	0.14	0.04	0.05	0.1	1.27	CTD-3099C6.9	chr19	sense_intronic	--
up	ENSG00000058453.16	1.2095	2.68078	5.89631e-09	8.53781e-07	0.51	0.61	0.42	0.8	0.84	2	CROCC	chr1	protein_coding	ciliary rootlet coiled-coil, rootletin
up	ENSG00000277739.1	3.33102	-2.36523	2.52066e-05	0.00119981	0	0.35	0	0	0.18	4.28	RNA5-8S5	chr21	rRNA	RNA, 5.8S ribosomal 5
up	ENSG00000160299.16	1.17887	4.91045	9.42657e-10	1.71824e-07	1.53	1.68	1.45	1.84	1.97	6.9	PCNT	chr21	protein_coding	pericentrin
up	ENSG00000241634.1	2.99612	-2.57044	0.000375215	0.0106278	0	0.11	0	0.05	0.05	0.95	RP11-381E24.1	chr3	processed_pseudogene	--
up	ENSG00000171368.11	1.39911	-0.355761	2.16213e-05	0.00106009	0.08	0.04	0.04	0.13	0.18	0.17	TPPP	chr5	protein_coding	tubulin polymerization promoting protein
up	ENSG00000281530.1	3.78553	-2.6143	7.24407e-05	0.00288768	0	0	0.04	0	0.07	0.6	DGCR12	chr22	sense_intronic	DiGeorge syndrome critical region gene 12 (non-protein coding)
up	ENSG00000162512.15	1.07292	4.4454	3.07645e-08	3.78293e-06	1.74	1.95	1.91	3.6	3.79	4.69	SDC3	chr1	protein_coding	syndecan 3
up	ENSG00000187775.16	1.62678	3.65826	7.39274e-16	5.72697e-13	0.32	0.45	0.43	0.46	0.53	2.76	DNAH17	chr17	protein_coding	dynein, axonemal, heavy chain 17
up	ENSG00000279192.1	1.66816	0.160707	8.21569e-09	1.15718e-06	0.08	0.29	0.06	0.03	0.13	1.23	PWAR5	chr15	TEC	Prader Willi/Angelman region RNA 5
up	ENSG00000280388.1	1.31458	-0.910489	0.000324639	0.00945449	0.08	0.24	0.03	0.03	0.14	0.77	RP11-229D13.3	chr7	TEC	--
up	ENSG00000105392.15	1.9178	-1.91569	0.000502017	0.0132444	0.01	0.04	0	0.03	0.03	0.14	CRX	chr19	protein_coding	cone-rod homeobox
up	ENSG00000248103.1	2.52251	-0.931027	7.5321e-10	1.44072e-07	0.24	0.29	0.11	0.1	0.05	3.84	CTC-338M12.9	chr5	lincRNA	--
up	ENSG00000140848.16	1.00668	4.20921	2.27065e-07	2.11293e-05	3.67	3.7	3.79	7.74	8.58	6.78	CPNE2	chr16	protein_coding	copine II
up	ENSG00000280130.1	1.46836	-0.149073	1.79953e-06	0.000123367	0.7	1.55	0.86	0.43	0.43	8.07	AC073333.1	chr7	protein_coding	--
up	ENSG00000138642.14	1.11684	-0.643627	0.00133406	0.0278374	0.1	0.06	0.09	0.14	0.23	0.19	HERC6	chr4	protein_coding	HECT and RLD domain containing E3 ubiquitin protein ligase family member 6
up	ENSG00000171303.6	1.09424	-0.390052	0.000739338	0.0178388	0.07	0.06	0.06	0.16	0.1	0.16	KCNK3	chr2	protein_coding	potassium channel, two pore domain subfamily K, member 3
up	ENSG00000182963.9	2.10338	0.606141	3.46375e-14	1.60196e-11	0.06	0.07	0.05	0.21	0.26	0.33	GJC1	chr17	protein_coding	gap junction protein, gamma 1, 45kDa
up	ENSG00000241489.7	1.90145	-2.22226	0.00257159	0.0456915	0.01	0.04	0.01	0.01	0.03	0.22	IDS	chrX	protein_coding	iduronate 2-sulfatase
up	ENSG00000272476.1	1.26372	-0.0822456	2.78123e-05	0.0012863	0.17	0.23	0.14	0.44	0.39	0.51	RP1-191J18.66	chr6	antisense	--
up	ENSG00000275793.1	2.61966	-2.44812	0.000500014	0.0132427	0	0	0.01	0.02	0.03	0.05	RIMBP3	chr22	protein_coding	RIMS binding protein 3
up	ENSG00000197837.3	2.20941	-1.25749	6.70417e-07	5.27264e-05	0	0.51	0.05	0.38	0.56	1.87	HIST4H4	chr12	protein_coding	histone cluster 4, H4
up	ENSG00000213020.8	1.04653	1.11046	1.28162e-05	0.000664109	0.24	0.27	0.25	0.4	0.34	0.87	ZNF611	chr19	protein_coding	zinc finger protein 611
up	ENSG00000232406.6	1.36607	-1.46877	0.00199259	0.0379033	0.05	0.08	0.03	0.13	0.1	0.21	RP11-234K24.3	chr20	antisense	--
up	ENSG00000229953.1	1.7536	2.30579	9.06659e-16	6.53364e-13	2.26	3.11	2.52	3.33	3.18	20.46	RP11-284F21.7	chr1	antisense	--
up	ENSG00000258708.1	1.11423	1.09846	4.36509e-06	0.000264182	0.75	0.57	0.5	1.28	1.28	1.51	SLC25A21-AS1	chr14	antisense	SLC25A21 antisense RNA 1
up	ENSG00000115828.15	1.69717	2.46139	3.69548e-15	2.33698e-12	1.39	1.14	1.43	4.82	4.29	4.09	QPCT	chr2	protein_coding	glutaminyl-peptide cyclotransferase
up	ENSG00000230189.6	1.97412	-1.14871	1.96755e-06	0.000133703	0.06	0.09	0.08	0.09	0.06	0.79	GS1-124K5.2	chr7	transcribed_unprocessed_pseudogene	--
up	ENSG00000146858.7	1.38751	-0.763005	8.05971e-05	0.00313752	0.11	0.2	0.14	0.14	0.12	0.94	ZC3HAV1L	chr7	protein_coding	zinc finger CCCH-type, antiviral 1-like
up	ENSG00000275209.1	4.37251	-0.163429	2.84558e-25	6.78278e-22	1.09	2.73	0	78.83	8.85	1.16	FP236383.4	chr21	miRNA	--
up	ENSG00000253731.2	1.07931	-0.745109	0.00241831	0.043711	0.02	0.05	0.04	0.06	0.06	0.13	PCDHGA6	chr5	protein_coding	protocadherin gamma subfamily A, 6
up	ENSG00000281207.1	1.27566	1.06843	1.7318e-07	1.68223e-05	0.16	0.29	0.21	0.13	0.21	1.3	SLFNL1-AS1	chr1	antisense	SLFNL1 antisense RNA 1
up	ENSG00000110427.14	2.35317	-2.12851	0.000170294	0.00567971	0.01	0	0	0.03	0.02	0.02	KIAA1549L	chr11	protein_coding	KIAA1549-like
up	ENSG00000240204.2	2.61666	-2.45198	0.000500014	0.0132427	0.03	0.05	0	0.24	0.21	0.11	SMKR1	chr7	protein_coding	small lysine-rich protein 1
up	ENSG00000226648.1	2.74168	-2.71352	0.00187951	0.0363095	0.04	0	0	0.06	0.15	0.1	PLCG1-AS1	chr20	antisense	PLCG1 antisense RNA 1
up	ENSG00000234965.2	3.31901	-0.892629	6.80007e-13	2.45016e-10	0.02	0.02	0.13	0.41	0.62	0.67	SHISA8	chr22	protein_coding	shisa family member 8
up	ENSG00000272791.1	1.24492	-1.09994	0.00148898	0.0304347	0.29	0.2	0.19	0.76	0.55	0.37	RP11-464F9.22	chr10	lincRNA	--
up	ENSG00000224424.7	1.48147	-0.605122	2.65862e-05	0.0012407	0.05	0.08	0.11	0.16	0.21	0.33	PRKAR2A-AS1	chr3	antisense	PRKAR2A antisense RNA 1
up	ENSG00000126001.15	1.15864	6.35903	1.10791e-09	1.92869e-07	2.48	3.29	2.82	3.2	3.12	13.05	CEP250	chr20	protein_coding	centrosomal protein 250kDa
up	ENSG00000108819.10	1.1521	4.8384	2.28093e-09	3.62457e-07	3.58	4.27	3.55	7.15	7.08	11.68	PPP1R9B	chr17	protein_coding	protein phosphatase 1, regulatory subunit 9B
up	ENSG00000227354.6	1.47899	-0.196472	2.7921e-06	0.000182915	0.07	0.15	0.14	0.42	0.31	0.32	RBM26-AS1	chr13	antisense	RBM26 antisense RNA 1
up	ENSG00000280023.1	2.51878	-2.02711	2.6901e-05	0.00125162	0.06	0.1	0	0.07	0	0.99	LLNLR-276H7.1	chr19	TEC	--
up	ENSG00000279794.1	1.91136	-1.11907	2.99725e-06	0.000193491	0.2	0.44	0	0.16	0.28	2.15	CTD-2621I17.3	chr19	TEC	--
up	ENSG00000198788.8	2.75061	-2.7091	0.00187951	0.0363095	0.01	0.01	0	0.01	0.01	0.08	MUC2	chr11	processed_transcript	mucin 2, oligomeric mucus/gel-forming
up	ENSG00000279283.1	1.47618	-0.751964	2.90153e-05	0.0013261	0.08	0.23	0.12	0.2	0.12	0.92	RP11-417L19.5	chr12	TEC	--
up	ENSG00000279744.1	1.26622	-1.32225	0.00208333	0.0391486	0.02	0.18	0.13	0.02	0.03	0.76	RP13-20L14.10	chr17	TEC	--
up	ENSG00000275223.1	1.69784	-0.332931	2.33788e-07	2.16898e-05	0.37	0.37	0.54	1.02	0.49	2.75	RP1-63M2.7	chr20	lincRNA	--
up	ENSG00000226696.5	1.13581	-0.567147	0.000524281	0.0136981	0.24	0.42	0.17	0.34	0.25	1.33	LENG8-AS1	chr19	antisense	LENG8 antisense RNA 1
up	ENSG00000196604.11	3.68086	0.950835	3.10874e-34	1.60551e-30	0.04	0.09	0.03	0.02	0.01	2.13	POTEF	chr2	protein_coding	POTE ankyrin domain family, member F
up	ENSG00000275252.1	5.14254	-2.97124	0.000332393	0.00958128	0	0	0	0	0	3.24	FP671120.2	chr21	miRNA	--
up	ENSG00000280828.1	2.81152	-0.612264	4.39882e-13	1.66227e-10	0.16	0.19	0.11	0.13	0.1	3.23	RP11-274B21.1	chr7	unprocessed_pseudogene	--
up	ENSG00000270722.1	2.17387	-2.45037	0.00246413	0.0442387	0.16	0.33	0.18	0.33	1.82	1.21	U1	chr1	snRNA	--
up	ENSG00000261123.1	3.93072	-2.52631	2.27492e-05	0.00110307	0	0.04	0	0	0.05	0.95	RP11-304L19.3	chr16	sense_intronic	--
up	ENSG00000270106.5	1.4096	0.454399	1.78354e-07	1.7217e-05	0.14	0.22	0.18	0.15	0.18	1.14	TSNAX-DISC1	chr1	protein_coding	TSNAX-DISC1 readthrough (NMD candidate)
up	ENSG00000095752.6	1.22424	2.07137	2.07794e-08	2.70579e-06	0.8	0.97	1.03	1.86	2.24	2.63	IL11	chr19	protein_coding	interleukin 11
up	ENSG00000281591.1	2.67087	-0.72025	1.01366e-11	2.88167e-09	0.02	0.05	0.04	0.03	0.05	0.69	DBET	chr4	lincRNA	D4Z4 binding element transcript (non-protein coding)
up	ENSG00000180806.4	1.40221	0.398217	4.0993e-07	3.49931e-05	0.33	0.34	0.52	1.14	1.17	0.91	HOXC9	chr12	protein_coding	homeobox C9
up	ENSG00000102870.5	1.31581	4.86943	1.02319e-11	2.88232e-09	2.32	2.79	2.25	4.67	4.88	9.17	ZNF629	chr16	protein_coding	zinc finger protein 629
up	ENSG00000257315.1	3.03141	-0.992304	1.06653e-11	2.97734e-09	0.01	0.04	0	0.03	0.04	0.45	ZBED6	chr1	protein_coding	zinc finger, BED-type containing 6
up	ENSG00000160766.14	1.01511	0.112878	0.000381762	0.0107738	0.19	0.19	0.19	0.28	0.32	0.59	GBAP1	chr1	transcribed_unprocessed_pseudogene	glucosidase, beta, acid pseudogene 1
up	ENSG00000253764.1	1.10768	-0.584121	0.000806433	0.019003	0.47	0.5	0.3	0.27	0.17	2.41	RP11-439C15.4	chr8	lincRNA	--
up	ENSG00000154252.11	1.46823	0.211158	2.61636e-07	2.36365e-05	0.31	0.43	0.39	0.28	0.46	2.49	GAL3ST2	chr2	protein_coding	galactose-3-O-sulfotransferase 2
up	ENSG00000130595.16	3.73426	-1.69052	2.66945e-09	4.15669e-07	0.02	0	0.04	0.18	0.35	0.29	TNNT3	chr11	protein_coding	troponin T type 3 (skeletal, fast)
up	ENSG00000262601.1	1.43621	-1.41991	0.00183834	0.0357368	0.14	0.1	0.35	0.14	0.21	1.28	CTC-786C10.1	chr16	lincRNA	--
up	ENSG00000260852.1	2.08814	2.51295	1.40686e-21	2.07593e-18	0.37	0.63	0.45	0.98	0.93	4.37	FBXL19-AS1	chr16	antisense	FBXL19 antisense RNA 1 (head to head)
up	ENSG00000188878.16	1.34756	2.89032	6.64005e-11	1.60746e-08	0.6	0.76	0.76	1.31	1.36	2.82	FBF1	chr17	protein_coding	Fas (TNFRSF6) binding factor 1
up	ENSG00000280800.1	5.88835	-2.52628	1.15316e-06	8.40773e-05	0	0	0	0.06	0	0.62	CH507-513H4.6	chr21	lincRNA	--
up	ENSG00000101638.13	1.91486	-1.78158	0.000232727	0.00727733	0	0	0.01	0.01	0.02	0.04	ST8SIA5	chr18	protein_coding	ST8 alpha-N-acetyl-neuraminide alpha-2,8-sialyltransferase 5
up	ENSG00000229056.2	1.36897	2.3907	1.50869e-10	3.33928e-08	1.94	1.51	1.69	4.87	5.18	3.69	AC020571.3	chr2	antisense	--
up	ENSG00000223745.7	1.07664	1.08888	7.36431e-06	0.000414349	0.32	0.32	0.35	0.42	0.58	1.13	RP4-717I23.3	chr1	processed_transcript	--
up	ENSG00000196834.11	2.9986	1.2035	2.34099e-28	7.25401e-25	0.05	0.08	0.06	0.05	0.08	1.4	POTEI	chr2	protein_coding	POTE ankyrin domain family, member I
up	ENSG00000167460.14	1.2565	8.59556	3.3199e-11	8.29628e-09	72.97	63.75	65.57	173.06	175.97	149.26	TPM4	chr19	protein_coding	tropomyosin 4
up	ENSG00000049089.13	1.05107	6.00007	3.24951e-08	3.97994e-06	12.05	13.86	13.1	23.54	26.41	32.91	COL9A2	chr1	protein_coding	collagen, type IX, alpha 2
up	ENSG00000167535.7	1.33346	0.67595	2.70283e-07	2.42761e-05	0.18	0.31	0.25	0.61	0.64	0.66	CACNB3	chr12	protein_coding	calcium channel, voltage-dependent, beta 3 subunit
up	ENSG00000002079.12	1.70243	-1.174	8.14409e-05	0.00316242	0.02	0.01	0.04	0.07	0.07	0.11	MYH16	chr7	unitary_pseudogene	myosin, heavy chain 16 pseudogene
up	ENSG00000173821.19	1.00061	6.7537	1.23224e-07	1.23571e-05	2.5	3.1	2.65	2.46	2.66	11.55	RNF213	chr17	protein_coding	ring finger protein 213
up	ENSG00000275468.1	1.36803	-1.54415	0.00215931	0.0403319	0.2	0.14	0.1	0	0.09	1.13	LLNLR-304A6.2	chr19	processed_pseudogene	--
up	ENSG00000135976.16	1.50252	1.5013	1.22619e-10	2.76714e-08	0.17	0.24	0.15	0.26	0.24	1.12	ANKRD36	chr2	protein_coding	ankyrin repeat domain 36
up	ENSG00000239775.1	1.82091	-1.61562	0.000165724	0.00553967	0.08	0.11	0.25	0.54	0.23	0.84	AC017116.11	chr7	sense_overlapping	--
up	ENSG00000180071.18	1.00838	1.44525	1.05333e-05	0.000566658	0.34	0.43	0.33	0.27	0.41	1.57	ANKRD18A	chr9	protein_coding	ankyrin repeat domain 18A
up	ENSG00000257800.1	2.08601	-1.15608	8.7994e-07	6.66667e-05	0.08	0.08	0.03	0.18	0.16	0.53	FNBP1P1	chr2	processed_pseudogene	formin binding protein 1 pseudogene 1
up	ENSG00000278864.1	1.56964	-0.895445	2.32549e-05	0.00112103	0.15	0.14	0.07	0.19	0.06	0.88	RP11-45M22.2	chr17	TEC	--
up	ENSG00000273270.1	1.22503	3.43306	9.73365e-10	1.75358e-07	0.86	0.84	0.74	1.64	1.69	2.52	RP11-212P7.2	chr7	lincRNA	--
up	ENSG00000280308.1	1.69881	-1.80452	0.000732784	0.0177258	0	0.5	0.24	0	0.29	2.28	FKSG61	chr14	protein_coding	--
up	ENSG00000275160.1	2.61842	-2.45093	0.000500014	0.0132427	0.09	0.05	0	0.14	0.51	0.34	RP11-187C18.3	chr9	processed_pseudogene	--
up	ENSG00000251992.1	1.11641	-0.0769028	0.000151236	0.00518821	2.6	4.65	3.11	1.33	1.13	20.75	SCARNA17	chr18	scaRNA	small Cajal body-specific RNA 17
up	ENSG00000147883.10	1.49768	2.15723	8.25512e-12	2.39067e-09	0.5	0.53	0.5	1.39	1.41	1.63	CDKN2B	chr9	protein_coding	cyclin-dependent kinase inhibitor 2B (p15, inhibits CDK4)
up	ENSG00000280417.1	1.49764	-1.0558	0.000137477	0.00481877	0.14	0.12	0.03	0.25	0.4	0.22	RP11-5O17.1	chr3	TEC	--
up	ENSG00000120318.15	1.31963	0.751602	2.74776e-07	2.44669e-05	0.14	0.14	0.2	0.28	0.36	0.57	ARAP3	chr5	protein_coding	ArfGAP with RhoGAP domain, ankyrin repeat and PH domain 3
up	ENSG00000213809.8	1.07725	-0.66482	0.00203933	0.0385321	0.16	0.15	0.29	0.41	0.44	0.43	KLRK1	chr12	protein_coding	killer cell lectin-like receptor subfamily K, member 1
up	ENSG00000239002.3	2.41162	-2.09267	0.000107568	0.00398708	0.08	0.16	0.18	0.33	0.57	1.55	SCARNA10	chr12	snoRNA	small Cajal body-specific RNA 10
up	ENSG00000154548.8	1.16521	-0.813636	0.00160178	0.0322381	0.09	0.07	0.07	0.17	0.19	0.18	SRSF12	chr6	protein_coding	serine/arginine-rich splicing factor 12
up	ENSG00000135472.8	4.38015	-2.22663	2.35722e-07	2.18039e-05	0	0	0	0.02	0.05	0.07	FAIM2	chr12	protein_coding	Fas apoptotic inhibitory molecule 2
up	ENSG00000237152.3	1.51119	-1.62119	0.00181794	0.0354292	0.09	0.06	0.05	0.12	0.27	0.2	DLEU7-AS1	chr13	antisense	DLEU7 antisense RNA 1
up	ENSG00000092853.13	1.03942	3.9122	1.09766e-07	1.11154e-05	1.66	2.13	1.5	1.76	1.83	7.43	CLSPN	chr1	protein_coding	claspin
up	ENSG00000261550.1	3.53756	-2.76003	0.000414767	0.0114753	0	0.06	0	0.24	0.18	0.55	RP11-467J12.4	chr16	antisense	--
up	ENSG00000184058.12	1.61249	-1.55361	0.00122406	0.0260687	0.05	0.01	0.07	0.12	0.16	0.13	TBX1	chr22	protein_coding	T-box 1
up	ENSG00000261069.3	1.15643	0.116155	4.63036e-05	0.00197635	0.37	0.52	0.48	0.18	0.18	2.79	RP11-701H24.4	chr15	lincRNA	--
up	ENSG00000127528.5	1.08577	-0.42445	0.000965279	0.0216434	0.21	0.16	0.21	0.49	0.48	0.3	KLF2	chr19	protein_coding	Kruppel-like factor 2
up	ENSG00000144730.16	1.38287	0.747687	8.50168e-08	9.02197e-06	0.07	0.08	0.11	0.18	0.24	0.29	IL17RD	chr3	protein_coding	interleukin 17 receptor D
up	ENSG00000118557.15	1.16533	-0.474857	0.00043045	0.0118248	0.04	0.1	0.07	0.11	0.12	0.28	PMFBP1	chr16	protein_coding	polyamine modulated factor 1 binding protein 1
up	ENSG00000271119.1	3.53314	-2.76216	0.000414767	0.0114753	0.02	0	0	0.08	0.1	0.09	CTD-2012J19.3	chr5	lincRNA	--
up	ENSG00000173013.5	1.07334	0.214728	0.000127779	0.00456161	0.33	0.24	0.33	0.59	0.83	0.54	CCDC96	chr4	protein_coding	coiled-coil domain containing 96
up	ENSG00000261140.1	1.3953	-0.360459	1.72757e-05	0.000866219	0.82	0.82	0.65	0.9	0.83	4.53	RP11-20I23.6	chr16	antisense	--
up	ENSG00000197061.4	1.05452	-0.35451	0.000944449	0.0213151	1.11	0.74	1.03	0.63	1.74	3.79	HIST1H4C	chr6	protein_coding	histone cluster 1, H4c
up	ENSG00000274475.1	5.14254	-2.97124	0.000332393	0.00958128	0	0	0	0	0	1.24	RN7SL650P	chr14	misc_RNA	RNA, 7SL, cytoplasmic 650, pseudogene
up	ENSG00000256304.1	3.13645	-2.48624	0.000127486	0.00455641	0.01	0.01	0	0	0.05	0.22	CCDC150P1	chr12	processed_pseudogene	coiled-coil domain containing 150 pseudogene 1
up	ENSG00000280327.1	1.08501	-0.595349	0.00172991	0.0341648	0.26	0.19	0.16	0.46	0.28	0.62	LA16c-313F4.1	chr16	TEC	--
up	ENSG00000278987.1	1.29712	-0.869569	0.000306285	0.00907347	0.06	0.2	0.08	0.18	0.06	0.64	LA16c-431H6.7	chr16	TEC	--
up	ENSG00000279407.1	1.22662	-0.433983	0.000185031	0.00604167	0.07	0.14	0.15	0.08	0.07	0.72	AC007191.4	chr19	TEC	--
up	ENSG00000128564.6	1.48448	-0.189858	2.23902e-06	0.000149206	0.11	0.13	0.19	0.42	0.49	0.32	VGF	chr7	protein_coding	VGF nerve growth factor inducible
up	ENSG00000267263.1	2.79958	-1.30641	4.4833e-09	6.55302e-07	0.07	0.1	0.12	0.21	0.25	1.7	RP11-75C10.7	chr17	sense_intronic	--
up	ENSG00000224975.1	2.34616	-0.799628	1.67222e-09	2.81615e-07	0.09	0.23	0.16	0.29	0.2	2.02	INE1	chrX	sense_intronic	inactivation escape 1 (non-protein coding)
up	ENSG00000254462.1	2.46317	-0.880168	1.00524e-09	1.7902e-07	0.05	0.41	0.2	0.19	0.56	3.11	TMX2-CTNND1	chr11	protein_coding	TMX2-CTNND1 readthrough (NMD candidate)
up	ENSG00000279369.1	1.78351	-1.86595	0.00109298	0.0238172	0.07	0.01	0.05	0.2	0.16	0.14	RP11-51F16.1	chr17	TEC	--
up	ENSG00000240731.1	1.94197	-0.204238	1.22123e-09	2.10235e-07	0.62	1.11	0.54	0.5	1.33	7.3	RP5-890O3.9	chr1	sense_intronic	--
up	ENSG00000271734.1	5.50967	-2.76265	2.59184e-05	0.00122017	0	0	0	0.47	0.29	0.24	RP1-111B22.3	chr6	lincRNA	--
up	ENSG00000259444.1	2.06537	-2.12333	0.00071398	0.017384	0.21	0.07	0.15	0.21	0.35	1.4	RP11-736N17.8	chr14	sense_overlapping	--
up	ENSG00000240445.3	1.40612	-1.23736	0.000654575	0.0163049	0.14	0.07	0.06	0.09	0.11	0.56	FOXO3B	chr17	processed_pseudogene	forkhead box O3B pseudogene
up	ENSG00000262227.1	3.06443	-2.52835	0.000218775	0.006953	0.05	0	0.05	0	0.25	0.77	RP5-1050D4.5	chr17	antisense	--
up	ENSG00000185567.6	1.37894	3.34471	9.51972e-12	2.73137e-09	0.26	0.29	0.27	0.28	0.42	1.46	AHNAK2	chr14	protein_coding	AHNAK nucleoprotein 2
up	ENSG00000178917.14	1.04436	0.0511426	0.000384755	0.0108484	0.31	0.18	0.38	0.44	0.52	0.87	ZNF852	chr3	protein_coding	zinc finger protein 852
up	ENSG00000276916.1	1.96145	-2.02928	0.000739399	0.0178388	0.19	0.19	0.07	0.2	0.19	1.57	RP11-230F18.6	chr13	sense_intronic	--
up	ENSG00000269688.1	1.94932	-1.16577	2.77903e-06	0.000182445	0.22	0.33	0.3	0.11	0.44	2.89	AC008982.2	chr19	sense_intronic	--
up	ENSG00000071246.10	1.7818	-1.44813	8.27502e-05	0.00320522	0.01	0.03	0.02	0.04	0.07	0.1	VASH1	chr14	protein_coding	vasohibin 1
up	ENSG00000213793.4	2.64717	-1.94055	1.06308e-05	0.000569923	0.05	0.15	0.05	0.15	0.15	1.45	ZNF888	chr19	lincRNA	zinc finger protein 888
up	ENSG00000166546.13	1.75057	-0.881357	3.85626e-06	0.000239467	0.05	0.02	0.03	0.1	0.15	0.12	BEAN1	chr16	protein_coding	brain expressed, associated with NEDD4, 1
up	ENSG00000130283.8	1.13784	1.32993	1.19618e-06	8.62003e-05	0.57	0.56	0.49	1.09	1.16	1.44	GDF1	chr19	protein_coding	growth differentiation factor 1
up	ENSG00000257489.6	2.1892	-1.88367	9.06485e-05	0.0034425	0.08	0	0.07	0.04	0.06	0.62	RP11-175P13.3	chr12	transcribed_unprocessed_pseudogene	--
up	ENSG00000239883.8	1.62664	0.792608	3.17633e-10	6.51822e-08	0.21	0.34	0.21	0.27	0.27	1.86	PARGP1	chr10	transcribed_unprocessed_pseudogene	poly (ADP-ribose) glycohydrolase pseudogene 1
up	ENSG00000198740.8	1.24128	1.63181	4.39196e-08	5.09714e-06	0.21	0.28	0.29	0.27	0.32	1.3	ZNF652	chr17	protein_coding	zinc finger protein 652
up	ENSG00000146054.17	1.2131	-0.110114	7.25019e-05	0.00288768	0.09	0.09	0.11	0.22	0.3	0.16	TRIM7	chr5	protein_coding	tripartite motif containing 7
up	ENSG00000278771.1	3.02123	2.32287	2.70249e-37	1.67484e-33	2.24	4.93	2.5	2.57	9.88	67.18	Metazoa_SRP	chr14	misc_RNA	--
up	ENSG00000269937.1	2.62861	1.35334	1.11171e-24	2.46062e-21	0.13	0.22	0.16	0.08	0.18	2.95	RP11-20I23.8	chr16	antisense	--
up	ENSG00000060491.16	1.48566	6.0599	1.02385e-14	5.66538e-12	6.76	6.67	6.57	16.05	16.88	24.41	OGFR	chr20	protein_coding	opioid growth factor receptor
up	ENSG00000157657.14	1.18957	-0.888055	0.0010011	0.0223335	0.02	0.03	0.03	0.05	0.04	0.1	ZNF618	chr9	protein_coding	zinc finger protein 618
up	ENSG00000260992.1	3.2432	-2.91863	0.0023821	0.0431914	0	0.03	0	0.07	0.17	0.21	DOCK9-AS2	chr13	antisense	DOCK9 antisense RNA 2 (head to head)
up	ENSG00000279561.2	1.21731	1.22509	3.42452e-07	2.97919e-05	0.31	0.31	0.28	0.76	0.84	0.55	RP11-4L24.4	chr9	TEC	--
up	ENSG00000223396.2	1.73862	-1.15766	2.27826e-05	0.00110307	0.03	0.13	0.04	0.09	0.21	0.4	RP11-134G8.5	chr1	lincRNA	--
up	ENSG00000215041.9	1.17585	3.98623	2.03522e-09	3.30184e-07	1.54	1.62	1.78	2.03	2.05	7.21	NEURL4	chr17	protein_coding	neuralized E3 ubiquitin protein ligase 4
up	ENSG00000174460.3	2.74439	-2.37352	0.000181698	0.00596427	0.02	0	0.01	0.1	0.12	0.06	ZCCHC12	chrX	protein_coding	zinc finger, CCHC domain containing 12
up	ENSG00000235651.1	5.34364	-2.86028	9.21699e-05	0.00348727	0	0	0	0	0.02	0.28	AC064850.4	chr2	processed_pseudogene	--
up	ENSG00000224086.5	1.28314	0.558581	1.42229e-06	0.000100165	0.02	0.02	0.02	0.03	0.03	0.08	LL22NC03-86G7.1	chr22	antisense	--
up	ENSG00000167524.14	1.68372	-1.121	3.17245e-05	0.00142795	0.15	0.11	0.15	0.33	0.15	0.88	SGK494	chr17	protein_coding	--
up	ENSG00000256663.1	1.29125	1.0051	1.70326e-07	1.66495e-05	0.49	0.96	0.67	0.75	1.09	3.48	RP11-424C20.2	chr12	processed_pseudogene	--
up	ENSG00000127481.14	1.1025	7.45348	5.61468e-09	8.16817e-07	4.42	5.82	5.01	4.79	4.99	23.23	UBR4	chr1	protein_coding	ubiquitin protein ligase E3 component n-recognin 4
up	ENSG00000154917.10	1.52823	-0.975417	7.47068e-05	0.00295273	0.01	0.07	0.03	0.07	0.11	0.15	RAB6B	chr3	protein_coding	RAB6B, member RAS oncogene family
up	ENSG00000235499.1	2.85917	-2.02714	4.77837e-06	0.000286397	0	0.21	0.08	0	0.21	2.12	AC073046.25	chr2	lincRNA	--
up	ENSG00000232593.6	1.23692	-1.05447	0.00105691	0.0232768	0.13	0.1	0.09	0.07	0.07	0.67	KANTR	chrX	lincRNA	KDM5C adjacent non-coding transcript
up	ENSG00000099250.17	1.05936	2.44715	4.78871e-07	3.98892e-05	0.32	0.27	0.27	0.59	0.71	0.56	NRP1	chr10	protein_coding	neuropilin 1
up	ENSG00000276931.1	1.51171	-1.61783	0.00130217	0.0273561	0.21	0.08	0.28	0.73	0.3	0.67	RP11-161M6.6	chr16	sense_intronic	--
up	ENSG00000231560.1	2.05796	-0.797179	4.09306e-08	4.84091e-06	0.05	0.05	0.03	0.03	0.02	0.53	AC091814.3	chr12	lincRNA	--
up	ENSG00000237296.9	1.14733	0.2984	2.85109e-05	0.00131418	0.11	0.14	0.14	0.08	0.12	0.67	SMG1P1	chr16	transcribed_unprocessed_pseudogene	SMG1 pseudogene 1
up	ENSG00000130589.16	1.03866	3.98788	1.09482e-07	1.11154e-05	0.76	1.08	1.05	1.13	1.69	3.22	HELZ2	chr20	protein_coding	helicase with zinc finger 2, transcriptional coactivator
up	ENSG00000254929.6	1.80627	-2.12212	0.00252415	0.0450812	0.05	0.05	0.02	0.03	0.03	0.39	RP11-144G6.12	chr10	processed_transcript	--
up	ENSG00000280069.1	1.91944	-0.711736	1.46294e-07	1.45762e-05	0.09	0.15	0.04	0.1	0.06	0.98	CTD-2349P21.3	chr17	TEC	--
up	ENSG00000179431.6	1.10175	1.22029	3.27475e-06	0.000208367	0.55	0.51	0.51	1.02	1.35	1.11	FJX1	chr11	protein_coding	four jointed box 1 (Drosophila)
up	ENSG00000272679.1	1.07433	3.79675	4.91785e-08	5.60256e-06	15.85	13.84	12.84	18.8	17.39	54.88	RP11-216L13.18	chr9	processed_transcript	--
up	ENSG00000163885.11	1.52669	0.425406	3.42296e-08	4.14325e-06	0.26	0.13	0.39	0.7	0.75	0.85	CCDC37	chr3	protein_coding	coiled-coil domain containing 37
up	ENSG00000101188.4	1.29223	2.59169	7.34468e-10	1.4136e-07	0.72	0.78	0.74	1.51	2.18	1.96	NTSR1	chr20	protein_coding	neurotensin receptor 1 (high affinity)
up	ENSG00000114853.13	1.12261	1.46953	1.03722e-06	7.72607e-05	0.34	0.41	0.46	0.61	0.75	1.33	ZBTB47	chr3	protein_coding	zinc finger and BTB domain containing 47
up	ENSG00000224959.1	1.33179	-1.22189	0.00108923	0.0237941	0.15	0.33	0.14	0.19	0.34	1.13	AC017002.2	chr2	lincRNA	--
up	ENSG00000231431.7	1.62106	-0.653953	3.34679e-06	0.00021208	0.1	0.15	0.1	0.14	0.12	0.88	FAR2P4	chr2	transcribed_unprocessed_pseudogene	fatty acyl CoA reductase 2 pseudogene 4
up	ENSG00000214626.2	3.86016	-2.57008	4.05697e-05	0.00176812	0	0.02	0	0.02	0.02	0.44	POLR3DP1	chr10	processed_pseudogene	polymerase (RNA) III (DNA directed) polypeptide D, 44kDa pseudogene 1
up	ENSG00000215105.4	1.8806	-1.68726	0.000162557	0.00544556	0.02	0.01	0.02	0.04	0.06	0.08	TTC3P1	chrX	processed_pseudogene	tetratricopeptide repeat domain 3 pseudogene 1
up	ENSG00000196081.9	1.8677	0.428837	2.77346e-11	7.04437e-09	0.12	0.15	0.2	0.15	0.22	1.35	ZNF724P	chr19	protein_coding	zinc finger protein 724, pseudogene
up	ENSG00000242588.5	2.96957	-1.33898	1.90624e-09	3.12838e-07	0.07	0.07	0.03	0.02	0	1.47	RP11-274B21.14	chr7	processed_transcript	--
up	ENSG00000151746.13	1.16675	1.46048	4.63405e-07	3.90205e-05	0.15	0.13	0.13	0.29	0.27	0.4	BICD1	chr12	protein_coding	bicaudal D homolog 1 (Drosophila)
up	ENSG00000234432.4	1.03994	0.853119	3.08785e-05	0.00139888	0.35	0.4	0.39	0.82	0.64	0.98	RP11-1275H24.1	chr7	lincRNA	--
up	ENSG00000279765.3	1.74879	0.461682	2.54186e-10	5.46976e-08	0.63	0.63	0.74	0.58	0.84	5.46	RP11-437B10.1	chr15	protein_coding	--
up	ENSG00000231256.7	2.24941	-2.40875	0.00154151	0.0311793	0.01	0.02	0	0.02	0.04	0.09	C17orf105	chr17	protein_coding	chromosome 17 open reading frame 105
up	ENSG00000267546.2	1.48715	-1.18643	0.000268691	0.00821909	0.3	0.04	0.07	0.19	0.15	0.88	RP11-666A8.8	chr17	antisense	--
up	ENSG00000228705.1	2.03436	-1.83953	0.000149273	0.00515392	0.2	0.15	0.06	0.61	0.55	0.63	LINC00659	chr20	antisense	long intergenic non-protein coding RNA 659
up	ENSG00000214837.8	1.44517	0.734281	2.07822e-08	2.70579e-06	0.12	0.28	0.2	0.19	0.23	1.24	LINC01347	chr1	transcribed_unprocessed_pseudogene	long intergenic non-protein coding RNA 1347
up	ENSG00000278917.1	2.75945	-2.36595	0.000181698	0.00596427	0	0.01	0.01	0.01	0.01	0.14	RP11-15A1.4	chr19	TEC	--
up	ENSG00000279720.1	1.18732	-1.1358	0.00251645	0.0450476	0.16	0.64	0.48	0.55	0.32	2.16	bP-2171C21.6	chr21	processed_pseudogene	--
up	ENSG00000273802.1	1.11414	0.181438	8.66343e-05	0.00332657	0.9	0.73	1.29	0.74	1.47	4.22	HIST1H2BG	chr6	protein_coding	histone cluster 1, H2bg
up	ENSG00000146950.12	2.0691	-1.4488	2.7253e-05	0.0012661	0.01	0.01	0.03	0.07	0.04	0.06	SHROOM2	chrX	protein_coding	shroom family member 2
up	ENSG00000250753.2	1.73743	-0.839749	2.95563e-06	0.000191603	0.38	1.05	0.25	0.61	0.3	5.02	RP11-241F15.10	chr4	processed_pseudogene	--
up	ENSG00000212232.1	1.70795	0.0835947	1.05481e-08	1.46571e-06	1.24	2.49	1.51	1.5	4.46	11.77	SNORD17	chr20	snoRNA	small nucleolar RNA, C/D box 17
up	ENSG00000158373.8	1.32429	1.08196	5.75709e-08	6.44995e-06	1.08	1.29	1.24	2.17	2.58	4.51	HIST1H2BD	chr6	protein_coding	histone cluster 1, H2bd
up	ENSG00000261056.2	2.62427	-2.44703	0.000500014	0.0132427	0	0.03	0.02	0.07	0.07	0.24	RP11-454F8.2	chr16	transcribed_processed_pseudogene	--
up	ENSG00000137821.11	1.13659	0.0359238	0.000104605	0.00388658	0.07	0.07	0.06	0.17	0.14	0.15	LRRC49	chr15	protein_coding	leucine rich repeat containing 49
up	ENSG00000020181.17	2.17733	-0.578843	1.75634e-09	2.91035e-07	0.03	0.04	0.01	0.11	0.13	0.15	ADGRA2	chr8	protein_coding	adhesion G protein-coupled receptor A2
up	ENSG00000214176.9	1.50006	3.35801	1.49145e-13	6.41882e-11	0.61	0.69	0.62	0.55	0.78	4.16	PLEKHM1P	chr17	transcribed_unprocessed_pseudogene	pleckstrin homology domain containing, family M (with RUN domain) member 1 pseudogene
up	ENSG00000205181.5	1.02706	0.881352	4.00235e-05	0.00174924	0.16	0.17	0.16	0.31	0.37	0.37	LINC00654	chr20	lincRNA	long intergenic non-protein coding RNA 654
up	ENSG00000253636.1	1.44686	-1.34476	0.000740615	0.0178388	0.02	0.07	0.05	0.05	0.05	0.29	RP11-531A24.5	chr8	antisense	--
up	ENSG00000234814.7	2.66677	-0.637171	3.68414e-12	1.1303e-09	0.04	0.07	0.05	0.03	0.08	0.96	SVILP1	chr10	transcribed_unprocessed_pseudogene	supervillin pseudogene 1
up	ENSG00000263968.2	3.71072	-2.65921	0.00012949	0.00460149	0	0	0.1	0	0	1.72	RN7SL381P	chr16	misc_RNA	RNA, 7SL, cytoplasmic 381, pseudogene
up	ENSG00000184270.4	2.62758	-2.44518	0.000500014	0.0132427	0.07	0.07	0.08	0	0.28	1.23	HIST2H2AB	chr1	protein_coding	histone cluster 2, H2ab
up	ENSG00000274964.1	2.16626	-1.89599	0.000138485	0.00484338	0.06	0.02	0.07	0.32	0.3	0.06	RP11-817I4.1	chr12	sense_intronic	--
up	ENSG00000185745.9	1.39174	-1.11592	0.000714165	0.017384	0.02	0.05	0.06	0.06	0.21	0.07	IFIT1	chr10	protein_coding	interferon-induced protein with tetratricopeptide repeats 1
up	ENSG00000244560.6	1.00927	2.62485	1.13527e-06	8.35598e-05	0.72	1.12	0.89	1.06	1.22	3.32	RP4-800G7.2	chr7	transcribed_unprocessed_pseudogene	--
up	ENSG00000137819.13	1.33844	-1.03793	0.000812354	0.0191045	0.04	0.02	0.05	0.11	0.11	0.06	PAQR5	chr15	protein_coding	progestin and adipoQ receptor family member V
up	ENSG00000214617.9	1.82137	-1.25147	1.54482e-05	0.000789921	0.04	0.02	0.04	0.02	0.04	0.29	SLC6A10P	chr16	transcribed_unprocessed_pseudogene	solute carrier family 6 (neurotransmitter transporter), member 10, pseudogene
up	ENSG00000259877.2	1.06976	0.745821	2.53514e-05	0.00120117	0.35	0.54	0.24	0.72	0.87	0.89	RP11-46C24.7	chr16	antisense	--
up	ENSG00000209582.1	2.68821	-2.4063	0.000301634	0.00894425	0	0	0.66	0.61	1	2.95	SNORA48	chr17	snoRNA	small nucleolar RNA, H/ACA box 48
up	ENSG00000203709.9	1.02523	0.900449	3.36957e-05	0.00149803	0.07	0.07	0.06	0.05	0.08	0.31	C1orf132	chr1	lincRNA	chromosome 1 open reading frame 132
up	ENSG00000268575.1	2.28002	0.962831	5.44288e-18	5.27058e-15	0.06	0.15	0.13	0.16	0.12	1.41	RP1-283E3.8	chr1	processed_transcript	--
up	ENSG00000261553.5	1.86785	1.04032	1.47652e-13	6.41882e-11	0.16	0.25	0.15	0.14	0.16	1.76	RP11-29G8.3	chr13	processed_transcript	--
up	ENSG00000137877.9	1.97833	-0.60601	2.67793e-08	3.33258e-06	0.01	0.03	0.02	0.04	0.07	0.12	SPTBN5	chr15	protein_coding	spectrin, beta, non-erythrocytic 5
up	ENSG00000273618.1	5.88813	-2.5264	1.15316e-06	8.40773e-05	0	0	0	0.02	0.02	0.34	RP11-66N24.7	chr14	antisense	--
up	ENSG00000221890.2	1.17555	2.94518	9.26703e-09	1.2935e-06	0.68	0.78	0.71	1.28	1.77	1.98	NPTXR	chr22	protein_coding	neuronal pentraxin receptor
up	ENSG00000233602.1	3.44586	-2.29075	8.56748e-06	0.000474921	0	0.09	0	0	0.04	1.15	ERI3-IT1	chr1	sense_intronic	ERI3 intronic transcript 1
up	ENSG00000164898.12	1.00446	4.12257	2.54626e-07	2.31381e-05	9.18	7.81	8.57	19.68	17.97	15.26	C7orf55	chr7	protein_coding	chromosome 7 open reading frame 55
up	ENSG00000198286.9	1.38114	4.94574	9.62495e-13	3.31387e-10	3.35	3.62	3.51	6.61	7.03	14.19	CARD11	chr7	protein_coding	caspase recruitment domain family, member 11
up	ENSG00000267750.5	1.1872	-0.887857	0.00149667	0.0305576	0.02	0.07	0.06	0.07	0.1	0.19	RUNDC3A-AS1	chr17	antisense	RUNDC3A antisense RNA 1
up	ENSG00000125844.15	1.01417	8.39967	7.46878e-08	8.03595e-06	33.48	40.08	33.79	44.46	46.18	129.4	RRBP1	chr20	protein_coding	ribosome binding protein 1
up	ENSG00000277561.4	1.68633	-0.558027	1.55398e-06	0.000108209	0.11	0.08	0.1	0.19	0.22	0.59	GOLGA8IP	chr15	transcribed_unprocessed_pseudogene	golgin A8 family, member I, pseudogene
up	ENSG00000252139.1	2.0116	-1.99888	0.000488118	0.0130503	0.32	1.61	0.36	0.99	0.65	8.57	SCARNA18	chr18	scaRNA	small Cajal body-specific RNA 18
up	ENSG00000129250.11	1.16183	7.96378	8.25995e-10	1.55122e-07	16.99	18.21	17.01	30.96	32.4	55.95	KIF1C	chr17	protein_coding	kinesin family member 1C
up	ENSG00000270872.2	1.48802	-1.63852	0.00181794	0.0354292	0.18	0.13	0.03	0.19	0.16	0.7	SRGAP2D	chr1	unprocessed_pseudogene	SLIT-ROBO Rho GTPase activating protein 2D (pseudogene)
up	ENSG00000253910.2	3.45061	-2.80844	0.000742841	0.0178388	0.01	0	0	0	0.01	0.08	PCDHGB2	chr5	protein_coding	protocadherin gamma subfamily B, 2
up	ENSG00000268361.1	2.69727	-2.40262	0.000301634	0.00894425	0.07	0	0.15	0	0	1.59	L34079.2	chr19	protein_coding	--
up	ENSG00000233930.3	2.81659	-2.33125	0.000109327	0.00404745	0.01	0.02	0	0.05	0.05	0.2	KRTAP5-AS1	chr11	antisense	KRTAP5-1/KRTAP5-2 antisense RNA 1
up	ENSG00000270077.1	2.40417	-2.57438	0.00224924	0.0415854	0.05	0.1	0	0.2	0.24	0.46	KB-1958F4.1	chr8	sense_intronic	--
up	ENSG00000143816.7	2.17419	0.83642	4.7686e-16	3.78884e-13	0.16	0.12	0.14	0.53	0.65	0.77	WNT9A	chr1	protein_coding	wingless-type MMTV integration site family, member 9A
up	ENSG00000282458.1	1.07126	2.62227	2.52812e-07	2.30408e-05	1.3	1.88	1.85	1.64	1.65	7.4	WASH5P	chr19	transcribed_processed_pseudogene	WAS protein family homolog 5 pseudogene
up	ENSG00000279821.1	1.91715	-1.66367	0.000110986	0.00409906	0.04	0.02	0.04	0.06	0.13	0.18	RP11-1334A24.5	chr5	TEC	--
up	ENSG00000131016.16	1.19013	6.11213	4.23839e-10	8.47322e-08	4.34	4.2	4.38	6.35	7.47	16.19	AKAP12	chr6	protein_coding	A kinase (PRKA) anchor protein 12
up	ENSG00000127603.23	1.11261	8.03178	3.93651e-09	5.8086e-07	4.04	4.94	4.07	4.86	5.23	18.46	MACF1	chr1	protein_coding	microtubule-actin crosslinking factor 1
up	ENSG00000203804.4	2.31394	-1.80486	2.52046e-05	0.00119981	0.03	0.13	0.03	0.03	0.1	0.88	ADAMTSL4-AS1	chr1	processed_transcript	ADAMTSL4 antisense RNA 1
up	ENSG00000276603.1	2.05735	-1.97003	0.000321429	0.00938749	0.19	0.19	0.07	0.13	0.26	1.7	RP11-425M5.7	chr20	sense_intronic	--
up	ENSG00000196782.12	1.46331	-1.01537	0.000222885	0.00704748	0.03	0.02	0.03	0.04	0.07	0.14	MAML3	chr4	protein_coding	mastermind-like 3 (Drosophila)
up	ENSG00000242798.1	2.05777	-1.96882	0.000321429	0.00938749	0.09	0.14	0.1	0.19	0.05	1.29	RP11-506M12.1	chr7	antisense	--
up	ENSG00000222489.1	2.486	-2.52746	0.001366	0.0283322	0.18	0.18	0.2	0.19	0.37	3.08	SNORA79	chr14	snoRNA	small nucleolar RNA, H/ACA box 79
up	ENSG00000235903.7	1.30858	-1.1117	0.00148898	0.0304347	0.03	0.05	0.08	0.12	0.14	0.14	CPB2-AS1	chr13	antisense	CPB2 antisense RNA 1
up	ENSG00000198910.12	1.17603	5.00787	9.94804e-10	1.78185e-07	3.34	3.41	3.56	6.34	7.15	10.37	L1CAM	chrX	protein_coding	L1 cell adhesion molecule
up	ENSG00000178404.9	2.63602	-1.75387	1.44755e-06	0.000101713	0.01	0.05	0.01	0.03	0.05	0.46	CEP295NL	chr17	protein_coding	CEP295 N-terminal like
up	ENSG00000174599.5	1.25067	-0.086285	4.08764e-05	0.00177899	0.33	0.13	0.22	0.56	0.7	0.44	TRAM1L1	chr4	protein_coding	translocation associated membrane protein 1-like 1
up	ENSG00000281896.1	4.90651	-3.09265	0.00121601	0.025933	0	0	0	0	0.1	1.01	RP11-274B21.13	chr7	transcribed_unprocessed_pseudogene	--
up	ENSG00000271204.1	4.77197	-3.15764	0.00233862	0.0427029	0	0	0	0	0.03	0.11	RP11-138A9.1	chr7	lincRNA	--
up	ENSG00000159905.14	1.66064	-1.44453	0.000232066	0.00727102	0.08	0.05	0.01	0.08	0.06	0.34	ZNF221	chr19	protein_coding	zinc finger protein 221
up	ENSG00000262766.1	2.25544	-2.40537	0.00154151	0.0311793	0.15	0.05	0	0.1	0.05	0.94	RP11-196G11.4	chr16	sense_intronic	--
up	ENSG00000272449.1	1.20468	1.82058	6.45549e-08	7.09349e-06	1.88	1.67	2.1	4.35	4.71	4.34	RP3-395M20.12	chr1	lincRNA	--
up	ENSG00000103657.13	1.04723	4.34854	6.69928e-08	7.29272e-06	0.73	0.83	0.79	0.81	1.06	3.05	HERC1	chr15	protein_coding	HECT and RLD domain containing E3 ubiquitin protein ligase family member 1
up	ENSG00000101197.12	1.42332	1.67803	4.58671e-10	9.10771e-08	0.93	0.94	1.05	2.16	3.19	2.71	BIRC7	chr20	protein_coding	baculoviral IAP repeat containing 7
up	ENSG00000100441.9	1.01304	6.65207	8.78374e-08	9.19533e-06	8.44	8.89	8.5	15.22	15.64	22.51	KHNYN	chr14	protein_coding	KH and NYN domain containing
up	ENSG00000241860.6	2.58831	0.854561	7.75308e-21	1.04454e-17	0.05	0.11	0.06	0.06	0.06	1.23	RP11-34P13.13	chr1	processed_transcript	--
up	ENSG00000279041.1	1.97229	-0.856289	2.03277e-07	1.91458e-05	0.08	0.19	0.11	0.19	0.25	1.08	CTD-2373N4.3	chr8	TEC	--
up	ENSG00000235245.1	2.61951	-0.760257	4.14061e-11	1.02202e-08	0.26	0.17	0.19	0.22	0.43	3.36	RP11-122K13.12	chr10	antisense	--
up	ENSG00000279352.1	1.59305	-1.11635	5.89164e-05	0.0024085	0.09	0.31	0.21	0.16	0.13	1.65	RP11-411B10.7	chr18	TEC	--
up	ENSG00000215447.7	1.82046	0.597569	1.1795e-11	3.23445e-09	0.37	0.57	0.23	0.36	0.59	3.29	BX322557.10	chr21	processed_transcript	--
up	ENSG00000222009.8	1.87475	1.62253	1.44231e-15	9.5091e-13	0.63	0.9	0.67	0.75	1.31	6.15	BTBD19	chr1	protein_coding	BTB (POZ) domain containing 19
up	ENSG00000281383.1	5.88835	-2.52628	1.15316e-06	8.40773e-05	0	0	0	0.06	0	0.62	CH507-513H4.5	chr21	lincRNA	--
up	ENSG00000277369.1	1.3043	-0.724578	0.000309647	0.00915632	0.33	0.33	0.37	0.68	0.91	1.06	RP11-486I11.2	chr16	lincRNA	--
up	ENSG00000160013.8	2.25536	-1.43	5.6361e-06	0.0003289	0	0.02	0.1	0.11	0.26	0.19	PTGIR	chr19	protein_coding	prostaglandin I2 (prostacyclin) receptor (IP)
up	ENSG00000163888.3	1.02649	0.94876	3.3657e-05	0.00149803	0.65	0.75	1.03	1.51	2.19	1.38	CAMK2N2	chr3	protein_coding	calcium/calmodulin-dependent protein kinase II inhibitor 2
up	ENSG00000122574.10	2.13882	-2.26126	0.00104885	0.0231487	0.01	0.01	0	0.03	0.03	0.05	WIPF3	chr7	protein_coding	WAS/WASL interacting protein family, member 3
up	ENSG00000231367.5	2.39586	-2.57749	0.00224924	0.0415854	0.02	0.02	0.02	0.04	0.24	0.06	AC016995.3	chr2	lincRNA	--
up	ENSG00000225302.2	1.19469	-0.799733	0.000860626	0.0199463	0.07	0.07	0.03	0.12	0.11	0.17	RP11-539I5.1	chr10	antisense	--
up	ENSG00000184908.17	1.81992	-1.97303	0.0011132	0.0240549	0.02	0.04	0.02	0.03	0.08	0.17	CLCNKB	chr1	protein_coding	chloride channel, voltage-sensitive Kb
up	ENSG00000265800.1	1.56513	-0.7864	2.25332e-05	0.00109958	0.2	0.74	0.82	0.55	0.54	4.27	RP11-649A18.5	chr17	sense_intronic	--
up	ENSG00000251493.3	1.42294	-0.883062	0.000117976	0.00428072	0.05	0.19	0.09	0.35	0.33	0.23	FOXD1	chr5	protein_coding	forkhead box D1
up	ENSG00000226383.5	1.31675	-0.947192	0.000704032	0.0172322	0.12	0.08	0.15	0.3	0.28	0.31	AC093375.1	chr2	lincRNA	--
up	ENSG00000170049.9	1.17342	-0.0873564	9.64397e-05	0.00362228	0.25	0.16	0.17	0.37	0.41	0.59	KCNAB3	chr17	protein_coding	potassium channel, voltage gated subfamily A regulatory beta subunit 3
up	ENSG00000137497.17	1.23352	6.94899	8.46987e-11	2.00348e-08	8.35	9.52	8.37	12.09	12.34	38.14	NUMA1	chr11	protein_coding	nuclear mitotic apparatus protein 1
up	ENSG00000132881.11	1.2891	-0.0410017	1.27908e-05	0.000664109	0.35	0.36	0.19	0.55	0.65	1.1	RSG1	chr1	protein_coding	REM2 and RAB-like small GTPase 1
up	ENSG00000276997.4	1.9959	-0.713946	5.27073e-08	5.98257e-06	0.15	0.16	0.08	0.07	0.28	1.3	RP11-378J18.9	chr1	lincRNA	--
up	ENSG00000275530.1	2.4849	0.0291166	8.13453e-15	4.75593e-12	1.91	11.48	0	0	18.39	61.48	FP671120.4	chr21	miRNA	--
up	ENSG00000197774.12	2.00609	0.140428	1.67389e-11	4.43323e-09	0.33	0.39	0.17	0.31	0.31	3.09	EME2	chr16	protein_coding	essential meiotic structure-specific endonuclease subunit 2
up	ENSG00000277737.2	1.16771	0.287623	2.51157e-05	0.00119981	0.57	0.32	0.23	0.8	0.66	1.17	FP325317.1	chr9	protein_coding	--
up	ENSG00000225138.7	1.644	-0.333097	6.48551e-07	5.13981e-05	0.17	0.17	0.16	0.38	0.51	0.75	CTD-2228K2.7	chr5	processed_transcript	--
up	ENSG00000115297.10	2.25277	-2.19259	0.000424548	0.0116834	0.02	0.02	0.01	0.06	0.08	0.13	TLX2	chr2	protein_coding	T-cell leukemia homeobox 2
up	ENSG00000279432.1	1.22584	-1.11609	0.00148898	0.0304347	0.03	0.12	0.05	0	0.03	0.46	RP11-135N5.3	chr17	TEC	--
up	ENSG00000136367.13	1.50648	0.822222	3.74412e-09	5.57784e-07	0.07	0.12	0.06	0.12	0.18	0.43	ZFHX2	chr14	protein_coding	zinc finger homeobox 2
up	ENSG00000154133.14	1.95541	0.236328	4.15574e-11	1.02202e-08	0.08	0.12	0.06	0.27	0.32	0.44	ROBO4	chr11	protein_coding	roundabout, axon guidance receptor, homolog 4 (Drosophila)
up	ENSG00000275620.1	2.09426	-1.94551	0.000211191	0.00674659	0.02	0	0	0.04	0.02	0.06	FLJ16779	chr20	antisense	--
up	ENSG00000254389.3	1.24015	0.489192	3.68698e-06	0.00023034	0.4	0.42	0.28	1	1.07	0.64	RHPN1-AS1	chr8	antisense	RHPN1 antisense RNA 1 (head to head)
up	ENSG00000269978.1	1.76543	-2.00313	0.00165029	0.0329105	0.2	0.2	0.45	0.21	1.32	1.49	RP11-338N10.3	chr1	lincRNA	--
up	ENSG00000185989.10	1.46693	1.79441	7.5184e-11	1.80599e-08	0.41	0.41	0.34	0.78	0.95	1.55	RASA3	chr13	protein_coding	RAS p21 protein activator 3
up	ENSG00000143028.8	1.72844	0.475603	4.00099e-10	8.05057e-08	0.13	0.15	0.18	0.54	0.47	0.54	SYPL2	chr1	protein_coding	synaptophysin-like 2
up	ENSG00000277072.4	1.53287	2.77735	2.14742e-13	8.87228e-11	1.27	1.94	1.18	1.66	1.44	9.75	STAG3L2	chr7	transcribed_unprocessed_pseudogene	stromal antigen 3-like 2 (pseudogene)
up	ENSG00000179388.8	3.53712	-2.22667	2.91988e-06	0.000189682	0.01	0	0.01	0.05	0.05	0.08	EGR3	chr8	protein_coding	early growth response 3
up	ENSG00000106031.7	3.34615	-2.86464	0.00133048	0.0277813	0.01	0	0	0.03	0.02	0.03	HOXA13	chr7	protein_coding	homeobox A13
up	ENSG00000252010.1	2.97261	-1.94754	1.80818e-06	0.000123686	0	0.29	0.11	0	1.87	1.65	SCARNA5	chr2	scaRNA	small Cajal body-specific RNA 5
up	ENSG00000263327.6	1.21834	0.0698947	3.17258e-05	0.00142795	0.26	0.15	0.23	0.54	0.57	0.45	TAPT1-AS1	chr4	antisense	TAPT1 antisense RNA 1 (head to head)
up	ENSG00000279608.1	1.65896	-1.94185	0.00232853	0.0427029	0	0.02	0.02	0.02	0.02	0.1	RP11-182N22.9	chr9	TEC	--
up	ENSG00000114923.16	1.22863	-0.100499	4.95113e-05	0.00207887	0.09	0.1	0.12	0.22	0.18	0.34	SLC4A3	chr2	protein_coding	solute carrier family 4 (anion exchanger), member 3
up	ENSG00000087258.13	1.79445	-2.12614	0.00252415	0.0450812	0.01	0.01	0.01	0.04	0.01	0.04	GNAO1	chr16	protein_coding	guanine nucleotide binding protein (G protein), alpha activating activity polypeptide O
up	ENSG00000262691.1	1.89436	-1.57174	7.89219e-05	0.00308801	0.02	0.06	0.03	0.04	0.13	0.28	CTC-277H1.7	chr16	processed_transcript	--
up	ENSG00000122694.15	1.4979	-0.552141	1.58208e-05	0.000806313	0.12	0.11	0.16	0.53	0.19	0.44	GLIPR2	chr9	protein_coding	GLI pathogenesis-related 2
up	ENSG00000132688.10	1.7313	7.25381	2.28875e-19	2.44557e-16	11.74	11.24	11.08	25.93	28.46	60.79	NES	chr1	protein_coding	nestin
up	ENSG00000147889.16	1.18402	3.42937	3.59431e-09	5.41296e-07	1.98	1.62	1.96	4.14	4.87	4	CDKN2A	chr9	protein_coding	cyclin-dependent kinase inhibitor 2A
up	ENSG00000280649.1	1.06556	1.62602	2.70053e-06	0.000178045	1.39	1.65	1.92	3.6	4.15	2.93	AC245100.1	chr1	protein_coding	--
up	ENSG00000280341.1	1.21044	-1.07228	0.0013724	0.0284458	0.02	0.06	0.02	0.04	0.02	0.2	LA16c-60D12.1	chr22	lincRNA	--
up	ENSG00000126882.12	1.78781	-0.918555	3.71626e-06	0.000231702	0.02	0.06	0.04	0.13	0.13	0.2	FAM78A	chr9	protein_coding	family with sequence similarity 78, member A
up	ENSG00000062370.16	1.08237	0.664571	3.02834e-05	0.00137999	0.27	0.19	0.25	0.52	0.48	0.54	ZNF112	chr19	protein_coding	zinc finger protein 112
up	ENSG00000168298.5	2.18645	0.939905	6.50019e-17	6.10368e-14	0.77	1.62	0.27	0.83	1.68	10.09	HIST1H1E	chr6	protein_coding	histone cluster 1, H1e
up	ENSG00000123407.3	1.96586	0.0488984	1.9084e-10	4.16447e-08	0.14	0.1	0.08	0.43	0.39	0.46	HOXC12	chr12	protein_coding	homeobox C12
up	ENSG00000230513.1	1.28454	-0.146337	3.07806e-05	0.00139648	0.17	0.19	0.21	0.45	0.51	0.47	THAP7-AS1	chr22	antisense	THAP7 antisense RNA 1
up	ENSG00000187672.12	2.25669	-1.68934	1.91012e-05	0.000948539	0.01	0	0.02	0.03	0.08	0.07	ERC2	chr3	protein_coding	ELKS/RAB6-interacting/CAST family member 2
up	ENSG00000143479.15	1.0126	0.0709582	0.000427012	0.0117407	0.19	0.23	0.24	0.37	0.56	0.44	DYRK3	chr1	protein_coding	dual-specificity tyrosine-(Y)-phosphorylation regulated kinase 3
up	ENSG00000197714.8	1.89939	0.751341	7.03626e-13	2.47772e-10	0.19	0.16	0.18	0.12	0.29	1.63	ZNF460	chr19	protein_coding	zinc finger protein 460
up	ENSG00000173898.11	2.30851	4.26269	9.37986e-30	3.22949e-26	0.68	0.68	0.68	1.87	1.96	6.45	SPTBN2	chr11	protein_coding	spectrin, beta, non-erythrocytic 2
up	ENSG00000265799.1	1.91632	-1.18628	5.53286e-06	0.000323484	0.11	0.14	0.18	0.25	0.3	1.13	RP11-387H17.6	chr17	lincRNA	--
up	ENSG00000183638.5	1.70706	-1.91511	0.00159794	0.0322366	0.01	0.02	0.01	0.03	0.01	0.07	RP1L1	chr8	protein_coding	retinitis pigmentosa 1-like 1
up	ENSG00000237004.3	1.67716	-1.27152	6.00711e-05	0.00243642	0.42	0.3	0.27	0.19	0.55	2.63	ZNRF2P1	chr7	processed_pseudogene	zinc and ring finger 2 pseudogene 1
up	ENSG00000274267.1	1.49152	-0.651148	1.65761e-05	0.000838976	0.39	1.17	0.36	0.53	1.91	3.25	HIST1H3B	chr6	protein_coding	histone cluster 1, H3b
up	ENSG00000275832.4	1.07309	1.60886	2.18513e-06	0.00014656	0.26	0.33	0.27	0.49	0.49	0.88	ARHGAP23	chr17	protein_coding	Rho GTPase activating protein 23
up	ENSG00000187566.4	1.32514	-1.16316	0.00101153	0.0225175	0.23	0.14	0.13	0.44	0.48	0.36	NHLRC1	chr6	protein_coding	NHL repeat containing E3 ubiquitin protein ligase 1
up	ENSG00000258559.2	1.06047	-0.0645205	0.000327404	0.00949931	0.33	0.49	0.31	0.18	0.24	2.02	AC005519.4	chr14	sense_overlapping	--
up	ENSG00000236269.1	1.79888	-1.85937	0.000745339	0.0178622	0.07	0.18	0.08	0.07	0.22	0.96	ENO1-IT1	chr1	sense_intronic	ENO1 intronic transcript 1
up	ENSG00000181722.15	1.70929	0.174601	4.38614e-09	6.44138e-07	0.08	0.1	0.11	0.06	0.12	0.79	ZBTB20	chr3	protein_coding	zinc finger and BTB domain containing 20
up	ENSG00000229589.1	1.0274	0.182081	0.000238417	0.00741005	0.3	0.21	0.24	0.58	0.38	0.62	ACVR2B-AS1	chr3	antisense	ACVR2B antisense RNA 1
up	ENSG00000159433.11	1.20234	3.93962	9.22086e-10	1.69069e-07	0.44	0.63	0.52	0.54	0.5	2.66	STARD9	chr15	protein_coding	StAR-related lipid transfer (START) domain containing 9
up	ENSG00000256325.1	1.44765	-1.75483	0.00273327	0.0478443	0.07	0.72	0.08	0.15	0.14	2.28	RP11-611O2.1	chr12	antisense	--
up	ENSG00000250251.6	2.33679	0.438513	9.88997e-16	6.81023e-13	0.07	0.08	0.09	0.09	0.1	1.06	PKD1P6	chr16	transcribed_unprocessed_pseudogene	polycystic kidney disease 1 (autosomal dominant) pseudogene 6
up	ENSG00000235373.1	2.71542	0.480856	5.77482e-20	6.62757e-17	0.03	0.13	0.03	0.02	0.04	1.24	RP11-206L10.3	chr1	lincRNA	--
up	ENSG00000269699.5	3.93907	2.71134	2.97987e-57	9.23373e-53	0.13	0.53	0.18	0.22	0.27	12.49	ZIM2	chr19	protein_coding	zinc finger, imprinted 2
up	ENSG00000178015.4	3.23965	-2.92029	0.0023821	0.0431914	0.01	0	0	0.09	0.05	0.03	GPR150	chr5	protein_coding	G protein-coupled receptor 150
up	ENSG00000198466.11	1.24474	4.21332	1.85699e-10	4.08103e-08	1.27	1.53	1.39	1.3	1.47	7.26	ZNF587	chr19	protein_coding	zinc finger protein 587
up	ENSG00000114270.15	1.24502	5.46474	8.38846e-11	1.99949e-08	2.17	2.98	2.42	2.22	2.98	12.89	COL7A1	chr3	protein_coding	collagen, type VII, alpha 1
up	ENSG00000152669.8	1.74167	-1.39096	8.35276e-05	0.00322325	0.13	0.11	0.02	0.15	0.34	0.46	CCNO	chr5	protein_coding	cyclin O
up	ENSG00000280063.1	2.77448	0.530341	7.48932e-21	1.04454e-17	0.26	0.16	0.05	0.13	0.24	3.01	RP11-295D4.3	chr16	TEC	--
up	ENSG00000274627.1	1.43776	2.2991	2.19035e-11	5.70356e-09	0.33	0.65	0.31	0.35	0.33	2.87	RP11-104N10.2	chr16	sense_intronic	--
up	ENSG00000167522.14	1.33223	6.24388	3.0942e-12	9.58801e-10	3.43	4.78	3.71	5.28	5.31	19.78	ANKRD11	chr16	protein_coding	ankyrin repeat domain 11
up	ENSG00000228594.3	1.30232	3.30173	1.23234e-10	2.76714e-08	2.27	2.72	2.27	6.35	6.28	5.83	C1orf233	chr1	protein_coding	chromosome 1 open reading frame 233
up	ENSG00000239415.1	2.04319	-1.70456	4.79274e-05	0.00202333	0.03	0.07	0.03	0.01	0.05	0.48	AP001469.9	chr21	antisense	--
up	ENSG00000184304.14	1.8927	-1.37378	2.85847e-05	0.00131418	0.01	0.05	0.04	0.09	0.17	0.12	PRKD1	chr14	protein_coding	protein kinase D1
up	ENSG00000263740.2	3.54931	-2.22137	2.91988e-06	0.000189682	0.09	0.09	0	0.09	0.28	2.31	RN7SL4P	chr3	misc_RNA	RNA, 7SL, cytoplasmic 4, pseudogene
up	ENSG00000215458.8	1.01328	0.554082	0.000102952	0.00383896	0.2	0.16	0.15	0.21	0.23	0.62	AATBC	chr21	antisense	apoptosis associated transcript in bladder cancer
up	ENSG00000243708.8	2.55921	-1.99969	2.6901e-05	0.00125162	0.04	0.01	0	0.06	0.01	0.23	PLA2G4B	chr15	protein_coding	phospholipase A2, group IVB (cytosolic)
up	ENSG00000122133.16	1.3563	1.44084	6.68511e-09	9.59035e-07	1.03	1.24	1.58	3.06	3.55	3.51	PAEP	chr9	protein_coding	progestagen-associated endometrial protein
up	ENSG00000158292.6	1.15569	1.95305	1.53133e-07	1.51602e-05	0.41	0.54	0.6	1.18	1.16	1.21	GPR153	chr1	protein_coding	G protein-coupled receptor 153
up	ENSG00000279555.1	1.45641	-1.02439	0.000132556	0.00467198	0.03	0.18	0.09	0.01	0.13	0.69	RP11-426D19.1	chr17	TEC	--
up	ENSG00000155640.6	1.24309	3.14344	9.64961e-10	1.74861e-07	1.05	0.88	0.9	1.2	0.97	4.63	C10orf12	chr10	protein_coding	chromosome 10 open reading frame 12
up	ENSG00000229212.7	1.82246	-1.96962	0.0011132	0.0240549	0.02	0.05	0.07	0.02	0.1	0.41	RP11-561C5.4	chr15	transcribed_unprocessed_pseudogene	--
up	ENSG00000215154.6	1.10757	2.42327	1.48302e-07	1.4729e-05	1.21	1.03	1.03	1.18	1.4	4.6	AC141586.5	chr16	transcribed_unprocessed_pseudogene	--
up	ENSG00000221990.4	1.15885	2.03205	1.01286e-07	1.04271e-05	1.34	1.48	1.19	3	3.36	2.87	EXOC3-AS1	chr5	antisense	EXOC3 antisense RNA 1
up	ENSG00000173442.11	1.10123	5.21787	9.1115e-09	1.27755e-06	3.45	4.1	3.77	5.45	5.18	14.05	EHBP1L1	chr11	protein_coding	EH domain binding protein 1-like 1
up	ENSG00000198835.3	1.19293	1.54533	2.17568e-07	2.03679e-05	0.55	0.69	0.84	1.51	1.52	1.84	GJC2	chr1	protein_coding	gap junction protein, gamma 2, 47kDa
up	ENSG00000270060.1	1.48493	-1.186	0.000268691	0.00821909	0.09	0.51	0.31	0.29	0.47	1.93	RP11-390K5.6	chr11	sense_intronic	--
up	ENSG00000240602.7	1.36936	-0.378519	2.22148e-05	0.00108747	0.23	0.2	0.09	0.46	0.55	0.38	AADACP1	chr3	transcribed_unprocessed_pseudogene	arylacetamide deacetylase pseudogene 1
up	ENSG00000281881.1	2.71872	-2.12134	3.33166e-05	0.00148973	0	0.15	0	0.04	0.08	1.05	SPRY4-IT1	chr5	lincRNA	SPRY4 intronic transcript 1
up	ENSG00000105419.17	1.77973	-0.804623	1.6263e-06	0.000112738	0.08	0.08	0.04	0.19	0.32	0.22	MEIS3	chr19	protein_coding	Meis homeobox 3
up	ENSG00000123095.5	1.70722	-1.69079	0.000713517	0.017384	0.01	0.05	0.02	0.13	0.07	0.07	BHLHE41	chr12	protein_coding	basic helix-loop-helix family, member e41
up	ENSG00000112659.13	1.24978	3.64861	3.37092e-10	6.87202e-08	0.76	0.89	0.9	1.2	1.08	3.86	CUL9	chr6	protein_coding	cullin 9
up	ENSG00000130176.7	1.39151	-0.802525	0.000174074	0.00575058	0.13	0.13	0.14	0.39	0.38	0.3	CNN1	chr19	protein_coding	calponin 1, basic, smooth muscle
up	ENSG00000280230.1	2.83768	-2.66003	0.00110024	0.0238579	0	0.07	0.08	0.07	0	1.21	FKSG51	chr4	protein_coding	--
up	ENSG00000213290.4	4.76966	-3.15881	0.00233862	0.0427029	0	0	0	0.11	0	0.12	PGK1P2	chr19	processed_pseudogene	phosphoglycerate kinase 1, pseudogene 2
up	ENSG00000169856.8	1.14803	0.775937	5.64873e-06	0.000329017	0.28	0.39	0.36	0.31	0.23	1.78	ONECUT1	chr15	protein_coding	one cut homeobox 1
up	ENSG00000260261.1	1.00155	1.92255	4.77124e-06	0.000286397	0.75	0.65	0.49	0.6	0.78	2.49	RP11-480A16.1	chr3	lincRNA	--
up	ENSG00000223473.2	2.5707	-0.991406	1.15746e-09	2.0037e-07	0.1	0.12	0.08	0.07	0.15	1.67	GS1-124K5.3	chr7	lincRNA	--
up	ENSG00000280447.1	1.91643	-0.966122	9.28524e-07	6.98354e-05	0.43	0.64	0.24	0.73	0.43	4.1	FKSG52	chr5	protein_coding	--
up	ENSG00000056558.10	1.05494	-0.0592082	0.000388889	0.010955	0.07	0.07	0.1	0.11	0.14	0.26	TRAF1	chr9	protein_coding	TNF receptor-associated factor 1
up	ENSG00000162975.4	2.41242	-0.161856	1.06101e-12	3.59395e-10	0.09	0.08	0.13	0.48	0.54	0.66	KCNF1	chr2	protein_coding	potassium channel, voltage gated modifier subfamily F, member 1
up	ENSG00000262222.1	1.77656	-1.45422	0.000117591	0.00427674	0.12	0.02	0.01	0.2	0.25	0.15	RP11-876N24.4	chr16	antisense	--
up	ENSG00000110274.14	1.08309	4.55441	2.13191e-08	2.76408e-06	2.19	2.6	2.37	3.5	3.79	8.16	CEP164	chr11	protein_coding	centrosomal protein 164kDa
up	ENSG00000214425.6	1.12357	3.59989	1.53458e-08	2.05852e-06	0.84	1.4	0.89	1.13	1.27	4.53	LRRC37A4P	chr17	transcribed_unprocessed_pseudogene	leucine rich repeat containing 37, member A4, pseudogene
up	ENSG00000269940.1	1.27578	1.41091	4.86327e-08	5.56082e-06	1.45	2.59	2.64	3.99	4.08	8.43	RP11-73M18.7	chr14	sense_intronic	--
up	ENSG00000278249.1	1.47003	-0.854262	5.21404e-05	0.00216869	0.64	0.57	0.43	0.26	0.71	3.79	SCARNA2	chr1	scaRNA	small Cajal body-specific RNA 2
up	ENSG00000196371.3	1.1507	-0.154172	0.000185898	0.00606359	0.08	0.08	0.07	0.19	0.16	0.18	FUT4	chr11	protein_coding	fucosyltransferase 4 (alpha (1,3) fucosyltransferase, myeloid-specific)
up	ENSG00000235703.5	2.58655	-0.46425	1.06704e-12	3.59395e-10	0.05	0.03	0.03	0.07	0.05	0.57	LINC00894	chrX	antisense	long intergenic non-protein coding RNA 894
up	ENSG00000251562.7	2.06835	8.3681	1.63092e-26	4.21145e-23	10.27	19.8	8.88	8.37	10.92	144	MALAT1	chr11	lincRNA	metastasis associated lung adenocarcinoma transcript 1 (non-protein coding)
up	ENSG00000267096.1	3.18903	-2.0891	3.08507e-06	0.000197515	0.03	0.07	0	0	0.1	0.99	CTD-2537I9.13	chr19	sense_intronic	--
up	ENSG00000185900.9	1.7199	0.233058	2.68845e-09	4.16535e-07	0.21	0.31	0.21	0.16	0.25	2.09	POMK	chr8	protein_coding	protein-O-mannose kinase
up	ENSG00000281097.1	1.61818	-0.98054	2.34519e-05	0.00112667	0.27	0.27	0.03	0.14	0.17	1.59	LINC01395	chr11	lincRNA	long intergenic non-protein coding RNA 1395
up	ENSG00000270118.1	2.04879	-1.0973	6.95951e-07	5.44581e-05	0.22	0.51	0.4	0.22	0.07	4.6	RP11-57A19.5	chr16	lincRNA	--
up	ENSG00000181449.3	4.76633	-3.16049	0.00233862	0.0427029	0	0	0	0.01	0.06	0.03	SOX2	chr3	protein_coding	SRY (sex determining region Y)-box 2
up	ENSG00000163945.15	1.45339	2.8937	2.313e-12	7.37992e-10	0.66	0.66	0.65	0.71	0.73	4.02	UVSSA	chr4	protein_coding	UV-stimulated scaffold protein A
up	ENSG00000227507.2	1.82911	-0.19644	1.60737e-08	2.14688e-06	0.27	0.36	0.43	1.07	1.48	1.33	LTB	chr6	protein_coding	lymphotoxin beta (TNF superfamily, member 3)
up	ENSG00000280132.1	1.92671	-0.644976	8.81466e-08	9.19663e-06	0.06	0.21	0.06	0.49	0.34	0.49	RP11-452L6.6	chr16	TEC	--
up	ENSG00000200795.1	1.63703	-1.4552	0.000325059	0.00945784	1.33	0.76	0.64	0.39	6.54	2.02	RNU4-1	chr12	snRNA	RNA, U4 small nuclear 1
up	ENSG00000103832.10	4.77197	-3.15764	0.00233862	0.0427029	0	0	0	0	0.03	0.13	GOLGA8UP	chr15	unprocessed_pseudogene	golgin A8 family, member U, pseudogene
up	ENSG00000278716.1	3.24544	-2.91632	0.0023821	0.0431914	0	0	0.03	0.05	0.05	0.25	LA16c-352F7.1	chr16	lincRNA	--
up	ENSG00000224358.1	2.24849	-2.40707	0.00154151	0.0311793	0	0.02	0.03	0.05	0.05	0.17	RP11-466F5.8	chr1	antisense	--
up	ENSG00000242294.6	1.6396	2.3444	3.20276e-14	1.52683e-11	1.39	2.2	1.62	1.79	1.58	13.03	STAG3L5P	chr7	transcribed_unprocessed_pseudogene	stromal antigen 3-like 5 pseudogene
up	ENSG00000185453.12	1.04471	2.28765	8.92642e-07	6.74641e-05	0.78	0.79	0.77	1.29	1.27	2.4	C19orf68	chr19	protein_coding	chromosome 19 open reading frame 68
up	ENSG00000263934.4	1.78234	2.62903	7.88814e-17	6.9837e-14	3.29	4.14	3.12	4.7	13.22	19.25	SNORD3A	chr17	snoRNA	small nucleolar RNA, C/D box 3A
up	ENSG00000278912.1	2.40942	-2.57183	0.00224924	0.0415854	0	0.12	0	0.08	0.08	0.61	CTD-2196E14.8	chr16	TEC	--
up	ENSG00000196972.7	1.55071	-1.68963	0.00138101	0.0286052	0.07	0.03	0.02	0.14	0.1	0.14	SMIM10L2B	chrX	protein_coding	small integral membrane protein 10 like 2B
up	ENSG00000198417.6	1.09467	4.90132	1.28304e-08	1.75919e-06	23.28	21.93	24.27	53.37	52.92	46.56	MT1F	chr16	protein_coding	metallothionein 1F
up	ENSG00000160111.12	1.62445	-1.6433	0.000977207	0.0218791	0.02	0.02	0.01	0.09	0.04	0.06	CPAMD8	chr19	protein_coding	C3 and PZP-like, alpha-2-macroglobulin domain containing 8
up	ENSG00000232164.1	1.66241	1.67617	4.10806e-13	1.59121e-10	0.35	1.66	0.37	0.72	0.73	6.27	AC092669.3	chr2	lincRNA	--
up	ENSG00000230295.1	2.25149	-2.40653	0.00154151	0.0311793	0.08	0.15	0.09	0.23	0.23	1.22	GTF2IP23	chr7	unprocessed_pseudogene	--
up	ENSG00000199347.1	2.78927	-2.06928	2.05146e-05	0.00100903	0.22	0.22	0.5	0.68	5.2	1.19	RNU5E-1	chr1	snRNA	RNA, U5E small nuclear 1
up	ENSG00000183032.10	1.02098	0.364707	0.000171171	0.00569717	0.18	0.18	0.16	0.4	0.36	0.33	SLC25A21	chr14	protein_coding	solute carrier family 25 (mitochondrial oxoadipate carrier), member 21
up	ENSG00000258472.8	1.37291	-1.25728	0.000877277	0.0201813	0.26	0.47	0.29	0.32	0.69	1.78	RP11-192H23.4	chr17	protein_coding	--
up	ENSG00000259295.6	1.16684	0.729144	4.17387e-06	0.000254922	0.09	0.08	0.07	0.09	0.12	0.31	CSPG4P12	chr15	transcribed_unprocessed_pseudogene	chondroitin sulfate proteoglycan 4 pseudogene 12
up	ENSG00000166780.10	2.07275	0.846837	5.72415e-15	3.47792e-12	0.26	0.19	0.21	0.88	1.12	0.88	C16orf45	chr16	protein_coding	chromosome 16 open reading frame 45
up	ENSG00000274641.1	1.27441	-0.980646	0.000582542	0.0148938	0.42	0.91	0.47	0.72	0.28	3.58	HIST1H2BO	chr6	protein_coding	histone cluster 1, H2bo
up	ENSG00000167548.14	1.19881	6.10846	3.16162e-10	6.51822e-08	1.64	2.48	1.66	1.61	1.61	10.13	KMT2D	chr12	protein_coding	lysine (K)-specific methyltransferase 2D
up	ENSG00000270108.1	2.31857	-2.36639	0.000961284	0.0216434	0.05	0.05	0.11	0.05	0.15	0.93	RP11-73M18.6	chr14	sense_intronic	--
up	ENSG00000167552.13	1.40073	6.94394	2.12495e-13	8.87228e-11	22.73	20.31	27.22	67.2	69.47	54.58	TUBA1A	chr12	protein_coding	tubulin, alpha 1a
up	ENSG00000278895.1	1.63816	-1.54676	0.000470878	0.0127211	0.03	0.14	0.02	0.07	0.04	0.49	CTC-448F2.7	chr19	TEC	--
up	ENSG00000225300.1	2.1852	-2.44469	0.00246413	0.0442387	0	0.04	0.02	0.04	0	0.25	RP11-1086F11.1	chr1	sense_intronic	--
up	ENSG00000280287.1	1.49262	1.38627	3.11585e-10	6.51822e-08	0.29	0.26	0.3	0.36	0.37	1.71	RP13-554M15.7	chr12	TEC	--
up	ENSG00000235897.1	1.6094	-1.24283	0.000113537	0.00415949	0.07	0.13	0.05	0.22	0.18	0.42	TM4SF19-AS1	chr3	antisense	TM4SF19 antisense RNA 1
up	ENSG00000225883.2	3.24584	-2.91715	0.0023821	0.0431914	0.03	0	0	0.12	0.03	0.26	BMS1P11	chr9	unprocessed_pseudogene	BMS1 ribosome biogenesis factor pseudogene 11
up	ENSG00000213085.9	1.81367	-1.97284	0.0011132	0.0240549	0.04	0	0.07	0.07	0.13	0.21	CFAP45	chr1	protein_coding	cilia and flagella associated protein 45
up	ENSG00000146122.16	1.54814	-1.69003	0.00194594	0.0371985	0.02	0.01	0.01	0.04	0.05	0.05	DAAM2	chr6	protein_coding	dishevelled associated activator of morphogenesis 2
up	ENSG00000100345.20	1.02221	9.32491	5.76576e-08	6.44995e-06	45.16	53.79	49.23	64.12	69.36	172.26	MYH9	chr22	protein_coding	myosin, heavy chain 9, non-muscle
up	ENSG00000185963.13	1.29728	4.99934	1.81141e-11	4.7568e-09	2.46	2.61	2.63	6.09	6	7.34	BICD2	chr9	protein_coding	bicaudal D homolog 2 (Drosophila)
up	ENSG00000049323.15	1.35766	-0.45413	5.69124e-05	0.00234202	0.06	0.04	0.04	0.14	0.14	0.12	LTBP1	chr2	protein_coding	latent transforming growth factor beta binding protein 1
up	ENSG00000214331.8	1.01208	0.264814	0.000251124	0.00775831	0.29	0.18	0.16	0.22	0.3	0.8	RP11-252A24.2	chr16	transcribed_unprocessed_pseudogene	--
up	ENSG00000258976.1	2.01706	-2.33338	0.00256048	0.0455724	0.12	0.08	0	0.41	0.08	0.43	CTD-2207P18.2	chr14	lincRNA	--
up	ENSG00000163395.16	1.44055	0.389609	1.70214e-07	1.66495e-05	0.05	0.07	0.04	0.05	0.06	0.32	IGFN1	chr1	protein_coding	immunoglobulin-like and fibronectin type III domain containing 1
up	ENSG00000245017.2	1.22914	-0.814084	0.000860626	0.0199463	0.18	0.09	0.18	0.44	0.34	0.3	RP11-181C3.1	chr12	lincRNA	--
up	ENSG00000278705.1	1.76708	-1.13913	1.64641e-05	0.000834978	0.12	0.73	0.2	0.31	0.99	2.53	HIST1H4B	chr6	protein_coding	histone cluster 1, H4b
up	ENSG00000235084.3	2.90523	-2.62207	0.000642932	0.0160536	0.06	0.06	0	0.55	0.42	0.13	CHCHD2P6	chr1	processed_pseudogene	coiled-coil-helix-coiled-coil-helix domain containing 2 pseudogene 6
up	ENSG00000272904.1	1.8481	-1.49896	5.65328e-05	0.0023295	0.17	0.08	0.28	0.04	0.09	1.88	RP11-392E22.11	chr9	processed_transcript	--
up	ENSG00000138380.17	1.1449	1.43044	8.21886e-07	6.25744e-05	0.16	0.19	0.18	0.4	0.42	0.38	CARF	chr2	protein_coding	calcium responsive transcription factor
up	ENSG00000227039.6	1.52833	-0.762334	2.25332e-05	0.00109958	0.11	0.1	0.09	0.2	0.32	0.36	ITGB2-AS1	chr21	antisense	ITGB2 antisense RNA 1
up	ENSG00000203867.7	2.27055	-1.5512	4.30844e-06	0.000261775	0.01	0.01	0	0.05	0.03	0.1	RBM20	chr10	protein_coding	RNA binding motif protein 20
up	ENSG00000171700.13	1.47691	3.47249	2.83192e-13	1.13964e-10	3.27	2.79	3.08	8.85	9.68	7.73	RGS19	chr20	protein_coding	regulator of G-protein signaling 19
up	ENSG00000218416.4	1.1177	-0.17014	0.000269503	0.00823578	0.18	0.21	0.29	0.49	0.57	0.48	PP14571	chr2	processed_transcript	--
up	ENSG00000187479.5	2.47104	-2.53298	0.001366	0.0283322	0	0	0.04	0.15	0.05	0.02	C11orf96	chr11	protein_coding	chromosome 11 open reading frame 96
up	ENSG00000100354.20	1.00352	4.54154	2.02609e-07	1.9141e-05	0.69	0.79	0.72	0.94	1.04	2.52	TNRC6B	chr22	protein_coding	trinucleotide repeat containing 6B
up	ENSG00000186446.11	1.12035	0.657813	1.6597e-05	0.000838976	0.24	0.26	0.25	0.49	0.62	0.58	ZNF501	chr3	protein_coding	zinc finger protein 501
up	ENSG00000279568.1	1.50512	-1.24015	0.000280593	0.00847439	0.09	0.12	0.07	0.09	0.22	0.54	RP11-20I23.5	chr16	TEC	--
up	ENSG00000248971.2	3.71082	-2.66032	0.00012949	0.00460149	0	0.02	0	0	0.02	0.34	KRT8P46	chr4	processed_pseudogene	keratin 8 pseudogene 46
up	ENSG00000255513.1	1.07636	-0.00948247	0.000184692	0.00603699	1.45	2.14	0.94	1.48	1.47	6.97	AC005363.9	chr16	transcribed_processed_pseudogene	--
up	ENSG00000279700.1	2.37534	-1.03564	1.39463e-08	1.88713e-06	0.02	0.12	0.13	0.12	0.06	1.28	RP13-554M15.2	chr12	TEC	--
up	ENSG00000132329.10	1.67762	-1.2654	8.33412e-05	0.00322325	0.09	0.11	0.17	0.29	0.62	0.3	RAMP1	chr2	protein_coding	receptor (G protein-coupled) activity modifying protein 1
up	ENSG00000131711.14	1.29024	6.00868	1.47302e-11	3.93487e-09	2.7	3.04	2.57	5.71	5.77	9.32	MAP1B	chr5	protein_coding	microtubule-associated protein 1B
up	ENSG00000179899.8	1.64766	-1.73137	0.00102162	0.0226932	0.03	0.06	0.01	0.04	0.04	0.26	PHC1P1	chr12	processed_pseudogene	polyhomeotic homolog 1 (Drosophila) pseudogene 1
up	ENSG00000150281.6	1.19439	1.72515	1.19547e-07	1.20664e-05	0.82	1.21	1.15	2.73	2.48	2.27	CTF1	chr16	protein_coding	cardiotrophin 1
up	ENSG00000119943.10	1.08396	-0.364441	0.000837268	0.0195071	0.18	0.2	0.22	0.31	0.57	0.43	PYROXD2	chr10	protein_coding	pyridine nucleotide-disulphide oxidoreductase domain 2
up	ENSG00000201321.1	1.67995	-1.19284	5.99557e-05	0.00243492	2.25	0.45	1.26	1.84	5.47	5.98	RNA5S9	chr1	rRNA	RNA, 5S ribosomal 9
up	ENSG00000277105.1	3.75024	-1.11806	1.35068e-13	5.97909e-11	1.88	0.47	0	0	7.13	28.95	FP236383.10	chr21	miRNA	--
up	ENSG00000280102.2	3.2436	3.1794	4.62236e-47	4.77443e-43	14.73	29.12	13.45	16.78	54.55	476.95	RN7SL2	chr14	miRNA	RNA, 7SL, cytoplasmic 2
up	ENSG00000213846.4	2.20158	-0.553909	2.08996e-09	3.34763e-07	0.29	0.18	0.32	0.88	1.31	1.57	AC098614.2	chr3	processed_pseudogene	--
up	ENSG00000271966.1	1.8929	-1.37247	2.85847e-05	0.00131418	0.05	0.12	0.16	0.37	0.46	0.43	RP11-7F18.2	chr8	lincRNA	--
up	ENSG00000174353.17	1.33297	1.05508	4.35959e-08	5.0786e-06	0.45	0.64	0.37	0.56	0.53	2.67	STAG3L3	chr7	transcribed_unprocessed_pseudogene	stromal antigen 3-like 3 (pseudogene)
up	ENSG00000245498.6	1.54618	-0.403092	2.173e-06	0.000146062	0.1	0.05	0.04	0.2	0.17	0.21	RP11-677M14.7	chr11	antisense	--
up	ENSG00000162068.1	3.24781	-2.91629	0.0023821	0.0431914	0	0.01	0	0.03	0.01	0.14	NTN3	chr16	protein_coding	netrin 3
up	ENSG00000228544.1	1.46833	0.0825246	5.38931e-07	4.3947e-05	0.2	0.21	0.18	0.18	0.2	1.3	CCDC183-AS1	chr9	antisense	CCDC183 antisense RNA 1
up	ENSG00000099814.15	1.01343	6.12304	9.3989e-08	9.77328e-06	5.17	6.74	6.16	7.52	8.81	20.75	CEP170B	chr14	protein_coding	centrosomal protein 170B
up	ENSG00000130119.15	1.49177	3.34916	2.08564e-13	8.85312e-11	1.94	1.85	1.97	2.49	2.6	11.31	GNL3L	chrX	protein_coding	guanine nucleotide binding protein-like 3 (nucleolar)-like
up	ENSG00000181773.6	1.03501	2.51336	7.29265e-07	5.66359e-05	1.56	1.65	1.48	3.51	3.7	2.7	GPR3	chr1	protein_coding	G protein-coupled receptor 3
up	ENSG00000226891.6	2.83454	-2.66163	0.00110024	0.0238579	0	0.01	0.01	0.01	0.01	0.1	LINC01359	chr1	lincRNA	long intergenic non-protein coding RNA 1359
up	ENSG00000117643.14	2.37164	-2.33531	0.00059783	0.0151958	0.01	0.01	0.01	0.03	0.05	0.04	MAN1C1	chr1	protein_coding	mannosidase, alpha, class 1C, member 1
up	ENSG00000106006.6	2.48301	-2.53014	0.001366	0.0283322	0.03	0.05	0	0.06	0.14	0.35	HOXA6	chr7	protein_coding	homeobox A6
up	ENSG00000281796.1	2.9176	-2.61571	0.000642932	0.0160536	0.02	0.02	0	0	0.05	0.24	EHMT1-IT1	chr9	sense_intronic	EHMT1 intronic transcript 1
up	ENSG00000174950.10	1.79555	-2.12767	0.00252415	0.0450812	0.05	0.05	0.02	0.11	0.16	0.2	CD164L2	chr1	protein_coding	CD164 sialomucin-like 2
up	ENSG00000250986.1	1.2627	0.316601	5.15007e-06	0.000305719	0.15	0.13	0.13	0.22	0.38	0.42	AC141928.1	chr4	lincRNA	--
up	ENSG00000230863.2	1.2682	-1.19457	0.00275783	0.0480905	0.25	0.18	0.36	0.74	0.69	0.54	RP4-595K12.2	chr1	processed_pseudogene	--
up	ENSG00000245888.6	1.12088	-0.571336	0.000926658	0.0210516	0.12	0.1	0.1	0.12	0.22	0.38	FLJ21408	chr16	antisense	--
up	ENSG00000204959.4	1.37229	-0.681542	0.000117478	0.00427674	0.06	0.06	0.07	0.1	0.09	0.31	ARHGEF34P	chr7	unprocessed_pseudogene	Rho guanine nucleotide exchange factor (GEF) 34, pseudogene
up	ENSG00000167100.14	1.29602	-1.36936	0.00227059	0.0418553	0.03	0.05	0.03	0.04	0.09	0.15	SAMD14	chr17	protein_coding	sterile alpha motif domain containing 14
up	ENSG00000213888.3	1.09505	0.579276	3.19625e-05	0.0014354	0.23	0.59	0.43	0.94	0.78	1.04	LINC01521	chr22	lincRNA	long intergenic non-protein coding RNA 1521
up	ENSG00000253931.1	1.63716	-0.736562	9.92044e-06	0.000538362	0.34	0.44	0.49	0.76	1.59	1.78	RP11-909N17.2	chr8	antisense	--
up	ENSG00000120738.7	1.60811	1.28554	2.76327e-11	7.04437e-09	0.26	0.4	0.33	0.96	1.17	1.01	EGR1	chr5	protein_coding	early growth response 1
up	ENSG00000015133.18	1.01208	4.4935	1.6434e-07	1.61664e-05	1.31	1.58	1.42	2.08	1.99	4.78	CCDC88C	chr14	protein_coding	coiled-coil domain containing 88C
up	ENSG00000118971.7	1.35846	5.59617	1.52713e-12	5.03418e-10	3.68	3.59	3.95	9	10.42	10.16	CCND2	chr12	protein_coding	cyclin D2
up	ENSG00000279107.1	1.62878	-0.69917	4.33748e-06	0.000263024	0.09	0.37	0.15	0.17	0.12	1.72	RP11-823P9.4	chr5	TEC	--
up	ENSG00000268614.1	1.16542	1.13407	1.17238e-06	8.52783e-05	1.25	1.25	1.24	0.87	1.06	6.62	CTD-2207O23.10	chr19	protein_coding	--
up	ENSG00000135436.8	1.7255	-1.7872	0.000732784	0.0177258	0.03	0.02	0.01	0.07	0.07	0.09	FAM186B	chr12	protein_coding	family with sequence similarity 186, member B
up	ENSG00000205885.7	1.9801	1.22122	1.62922e-15	1.05177e-12	0.13	0.2	0.09	0.21	0.14	1.36	C1RL-AS1	chr12	antisense	C1RL antisense RNA 1
up	ENSG00000259001.3	2.40896	2.74136	5.33466e-28	1.50277e-24	2.69	4.07	2.01	3.39	15.59	28.72	RPPH1	chr14	antisense	ribonuclease P RNA component H1
up	ENSG00000266145.1	2.21205	-1.36088	1.22356e-06	8.79684e-05	0.08	0.74	0.09	0.08	0.25	4.3	RHOT1P1	chr18	processed_pseudogene	ras homolog family member T1 pseudogene 1
up	ENSG00000224066.1	1.57992	-1.19257	0.000111215	0.00410264	0.08	0.22	0.07	0.14	0.42	0.59	RP4-622L5.7	chr1	antisense	--
up	ENSG00000189045.13	1.64863	-1.53445	0.000470878	0.0127211	0.03	0.06	0.05	0.14	0.19	0.13	ANKDD1B	chr5	protein_coding	ankyrin repeat and death domain containing 1B
up	ENSG00000265008.1	2.90902	-2.6191	0.000642932	0.0160536	0	0.06	0.06	0.35	0.29	0.42	RP11-53I6.3	chr18	antisense	--
up	ENSG00000204655.11	4.90465	-3.09359	0.00121601	0.025933	0	0	0	0.02	0.01	0.09	MOG	chr6	protein_coding	myelin oligodendrocyte glycoprotein
up	ENSG00000262265.1	2.43817	-2.29682	0.000370935	0.0105258	0.07	0.2	0	0.41	0.41	0.85	RP5-867C24.4	chr17	sense_intronic	--
up	ENSG00000124143.10	1.74287	1.91025	1.41393e-14	7.68658e-12	0.56	0.53	0.52	1.69	1.68	2.14	ARHGAP40	chr20	protein_coding	Rho GTPase activating protein 40
up	ENSG00000232653.8	1.1595	0.621293	8.28079e-06	0.000461505	0.14	0.18	0.14	0.34	0.41	0.3	GOLGA8N	chr15	protein_coding	golgin A8 family, member N
up	ENSG00000183260.6	2.13695	-2.26351	0.00104885	0.0231487	0.01	0.05	0	0.08	0.13	0.11	ABHD16B	chr20	protein_coding	abhydrolase domain containing 16B
up	ENSG00000163520.13	1.6322	-1.3726	0.000418157	0.0115588	0.03	0.01	0.04	0.11	0.1	0.09	FBLN2	chr3	protein_coding	fibulin 2
up	ENSG00000223703.1	5.02751	-3.03158	0.000634612	0.0159229	0	0	0	0	0.02	0.12	AC027612.4	chr2	unprocessed_pseudogene	--
up	ENSG00000205116.3	1.52302	-0.457595	5.78602e-06	0.000336382	0.93	0.33	0.61	0.84	0.61	4.11	TMEM88B	chr1	protein_coding	transmembrane protein 88B
up	ENSG00000177374.12	1.51521	-0.238126	2.23745e-06	0.000149206	0.04	0.06	0.06	0.16	0.16	0.16	HIC1	chr17	protein_coding	hypermethylated in cancer 1
up	ENSG00000272347.1	3.34516	-2.86529	0.00133048	0.0277813	0	0.02	0	0.09	0.09	0.07	RP11-43F13.4	chr5	lincRNA	--
up	ENSG00000238035.8	1.70103	-0.254857	1.21876e-07	1.22616e-05	0.13	0.19	0.21	0.21	0.16	1.41	AC138035.2	chr5	lincRNA	--
up	ENSG00000251184.1	2.05326	-0.866837	9.47475e-08	9.78647e-06	0.28	0.64	0.4	0.43	0.72	4.59	RP11-101E3.5	chr9	protein_coding	--
