# Supplementary material for: PAIP1 regulates expression of immune and inflammatory response associated genes at transcript level in liver cancer cell
Source: PeerJ. 2023 Apr 21;11:e15070. doi: 10.7717/peerj.15070 (PMC10124545; doi:10.7717/peerj.15070)
Supplement: Supplemental Information 7 [file peerj-11-15070-s007.xlsx]

## Sheet: Table S7
Table S7 GO biology process terms of PAIP1-knockdown upregulated genes
#Term	Database	ID	Input number	Background number	P-Value	Corrected P-Value	Input	Hyperlink
transcription, DNA-dependent	Gene Ontology	GO:0006351	41	1857	1.78363e-05	0.000802632	HOXC9|ZCCHC12|ZNF587|DUX4|CRX|ZFHX2|TBX1|MAPK11|ZNF629|EGR3|HOXA13|EGR4|KLF2|ZIM2|CDKN2B|ZNF221|CDKN2A|ZBED6|KMT2D|FOXD1|ZNF583|HOXC12|ZNF808|HELZ2|CARF|SETD7|HIC1|ZNF611|ZNF737|ZNF618|ZNF888|TLX2|HOXA6|ZBTB42|HIVEP2|ZBTB47|ZNF501|ZNF460|ZNF112|ZNF724P|ZNF652	http://amigo.geneontology.org/amigo/term/GO:0006351
regulation of small GTPase mediated signal transduction	Gene Ontology	GO:0051056	9	160	8.88361e-05	0.00199881	OBSCN|ARAP3|ARHGAP40|PLEKHG5|ARHGAP23|AKAP13|ARHGAP11B|RALGAPA2|RASA3	http://amigo.geneontology.org/amigo/term/GO:0051056
G2/M transition of mitotic cell cycle	Gene Ontology	GO:0000086	8	143	0.000228195	0.00342293	CDKN2B|CEP164|NUMA1|WNT10B|CEP250|NES|PCNT|TUBA1A	http://amigo.geneontology.org/amigo/term/GO:0000086
multicellular organismal development	Gene Ontology	GO:0007275	15	474	0.000337093	0.00344583	OBSCN|TMEM88|CATSPERG|HIC1|PAQR5|WNT9A|WNT10B|ADAMTS9|C19orf68|SPRED3|HOXC12|PAEP|WIPF3|PDCD1|WNT7B	http://amigo.geneontology.org/amigo/term/GO:0007275
cell-cell signaling	Gene Ontology	GO:0007267	10	237	0.00038287	0.00344583	LHX1|CTF1|IL11|GJC2|PTGIR|LTB|SSTR3|DLGAP1|WNT9A|NRP1	http://amigo.geneontology.org/amigo/term/GO:0007267
cellular response to retinoic acid	Gene Ontology	GO:0071300	5	57	0.000464068	0.00348051	CYP26B1|WNT10B|TBX1|WNT9A|WNT7B	http://amigo.geneontology.org/amigo/term/GO:0071300
cell cycle arrest	Gene Ontology	GO:0007050	7	132	0.000775138	0.00498303	CDKN2B|CDKN2A|VASH1|WNT10B|MACF1|SOX2|PPP1R9B	http://amigo.geneontology.org/amigo/term/GO:0007050
axon guidance	Gene Ontology	GO:0007411	11	334	0.00153706	0.00864594	NTN3|CACNB3|MYH9|COL9A2|FOXD1|ITGA10|COL5A1|L1CAM|SPTBN2|SPTBN5|NRP1	http://amigo.geneontology.org/amigo/term/GO:0007411
Wnt receptor signaling pathway	Gene Ontology	GO:0016055	7	157	0.00211642	0.0098133	TMEM88|MACF1|HIC1|WNT10B|CCDC88C|WNT9A|WNT7B	http://amigo.geneontology.org/amigo/term/GO:0016055
nucleosome assembly	Gene Ontology	GO:0006334	6	117	0.00218073	0.0098133	HIST1H2BD|HIST2H2BF|HIST1H1E|HIST1H2AG|HIST1H2BO|HIST2H2AB	http://amigo.geneontology.org/amigo/term/GO:0006334
angiogenesis	Gene Ontology	GO:0001525	8	206	0.0024672	0.0100931	VASH1|MYH9|RAMP1|ROBO4|RAMP2|TBX1|NRP1|PRKD1	http://amigo.geneontology.org/amigo/term/GO:0001525
cilium assembly	Gene Ontology	GO:0042384	5	86	0.0029648	0.0105131	CEP164|ONECUT1|FBF1|PCNT|RSG1	http://amigo.geneontology.org/amigo/term/GO:0042384
extracellular matrix organization	Gene Ontology	GO:0030198	10	312	0.00303712	0.0105131	SDC3|COL7A1|LTBP1|ITGA3|COL9A2|ITGA10|COL5A1|PLEC|MFAP2|FBLN2	http://amigo.geneontology.org/amigo/term/GO:0030198
small GTPase mediated signal transduction	Gene Ontology	GO:0007264	10	348	0.00649753	0.0200866	OBSCN|ARAP3|ARHGAP40|PLEKHG5|RSG1|RAB6B|RGS19|ARHGAP23|AKAP13|ARHGAP11B	http://amigo.geneontology.org/amigo/term/GO:0007264
regulation of transcription, DNA-dependent	Gene Ontology	GO:0006355	25	1305	0.00669553	0.0200866	KRBA2|CRX|SOX2|ZNF629|SETD7|ONECUT1|ZIM2|ZNF221|KMT2D|ZNF583|ZNF808|ZNF587|BICD1|HIC1|ZNF611|ZNF737|ZNF618|ZNF888|ZNF724P|ZBTB47|ZNF501|ZNF460|ZNF112|HIVEP2|ZNF652	http://amigo.geneontology.org/amigo/term/GO:0006355
positive regulation of transcription from RNA polymerase II promoter	Gene Ontology	GO:0045944	15	749	0.023691	0.0666309	CDKN2B|CDKN2A|MAML3|KMT2D|IL11|CRX|EGR1|HOXA13|FOXD1|TBX1|KLF2|HELZ2|SOX2|ONECUT1|PRKD1	http://amigo.geneontology.org/amigo/term/GO:0045944
signal transduction	Gene Ontology	GO:0007165	19	1045	0.0284247	0.0722549	TRAF1|KLRC2|ARAP3|ARHGAP40|RASA3|MICAL1|KLRK1|GRB10|CARD11|PLAU|PRKD1|ARHGAP23|LTB|ANKDD1B|MAPK11|ITPR3|IL17RD|NRP1|PDCD1	http://amigo.geneontology.org/amigo/term/GO:0007165
positive regulation of gene expression	Gene Ontology	GO:0010628	5	151	0.0290521	0.0722549	CYP26B1|RAMP2|ITGA3|WNT7B|FOXD1	http://amigo.geneontology.org/amigo/term/GO:0010628
heart development	Gene Ontology	GO:0007507	5	153	0.0305076	0.0722549	TBX1|ITGA3|NRP1|RBM20|RAMP2	http://amigo.geneontology.org/amigo/term/GO:0007507
in utero embryonic development	Gene Ontology	GO:0001701	6	220	0.039847	0.0896557	KMT2D|PCNT|MYH9|KLF2|WNT7B|ANKRD11	http://amigo.geneontology.org/amigo/term/GO:0001701
transport	Gene Ontology	GO:0006810	8	349	0.0460745	0.098731	SLC4A3|CACNB3|GJC1|HERC1|ABCA3|PAEP|CLCNKB|BICD1	http://amigo.geneontology.org/amigo/term/GO:0006810
G-protein coupled receptor signaling pathway	Gene Ontology	GO:0007186	7	317	0.0702084	0.143608	NTSR1|GNAO1|RAMP1|RGS19|AKAP12|ITPR3|RAMP2	http://amigo.geneontology.org/amigo/term/GO:0007186
synaptic transmission	Gene Ontology	GO:0007268	8	389	0.076349	0.149378	EPB41L1|KCNK3|CACNB3|KCNF1|NTSR1|DLGAP1|KCNAB3|GJC1	http://amigo.geneontology.org/amigo/term/GO:0007268
cell death	Gene Ontology	GO:0008219	5	207	0.0874341	0.158401	SPTBN2|GJC2|BICD2|BEAN1|L1CAM	http://amigo.geneontology.org/amigo/term/GO:0008219
protein transport	Gene Ontology	GO:0015031	8	402	0.0882843	0.158401	ADAMTS9|MYH9|RAMP1|RSG1|RAB6B|RAMP2|RRBP1|TRAM1L1	http://amigo.geneontology.org/amigo/term/GO:0015031
nerve growth factor receptor signaling pathway	Gene Ontology	GO:0048011	6	273	0.0915208	0.158401	OBSCN|AKAP13|PLEKHG5|MAPK11|ITPR3|TNRC6B	http://amigo.geneontology.org/amigo/term/GO:0048011
carbohydrate metabolic process	Gene Ontology	GO:0005975	7	354	0.109351	0.182251	NHLRC1|CHST14|ST8SIA5|SDC3|IDS|MDH1B|FUT4	http://amigo.geneontology.org/amigo/term/GO:0005975
cell adhesion	Gene Ontology	GO:0007155	8	445	0.135016	0.21699	ITGA3|COL7A1|TPM4|ITGA10|COL5A1|L1CAM|MOG|NRP1	http://amigo.geneontology.org/amigo/term/GO:0007155
mitotic cell cycle	Gene Ontology	GO:0000278	7	403	0.175608	0.272495	CDKN2B|CEP164|CDKN2A|NUMA1|TUBA1A|CEP250|PCNT	http://amigo.geneontology.org/amigo/term/GO:0000278
DNA repair	Gene Ontology	GO:0006281	5	280	0.213918	0.314233	CCNO|CEP164|HERC2|CLSPN|EME2	http://amigo.geneontology.org/amigo/term/GO:0006281
positive regulation of cell proliferation	Gene Ontology	GO:0008284	7	429	0.216472	0.314233	CTF1|KMT2D|IL11|WNT10B|EGR4|TBX1|WNT7B	http://amigo.geneontology.org/amigo/term/GO:0008284
intracellular signal transduction	Gene Ontology	GO:0035556	6	379	0.262278	0.363388	AKAP13|MAPK11|PLEKHM1P|RP1L1|PRKD1|RASA3	http://amigo.geneontology.org/amigo/term/GO:0035556
response to drug	Gene Ontology	GO:0042493	5	305	0.266484	0.363388	GNAO1|ITGA3|CCNO|ABCA3|KCNK3	http://amigo.geneontology.org/amigo/term/GO:0042493
blood coagulation	Gene Ontology	GO:0007596	7	469	0.285111	0.377352	TMSB4X|ITGA3|PLAU|PTGIR|ITGA10|L1CAM|ITPR3	http://amigo.geneontology.org/amigo/term/GO:0007596
negative regulation of apoptotic process	Gene Ontology	GO:0043066	7	475	0.295863	0.380396	FAIM2|BIRC7|EGR3|EGR1|EGR4|MICAL1|PCNT	http://amigo.geneontology.org/amigo/term/GO:0043066
spermatogenesis	Gene Ontology	GO:0007283	5	346	0.357574	0.446968	WIPF3|CYP26B1|SSTR3|CATSPERG|HERC2	http://amigo.geneontology.org/amigo/term/GO:0007283
negative regulation of transcription from RNA polymerase II promoter	Gene Ontology	GO:0000122	7	565	0.462541	0.553603	HIC1|ZBED6|BHLHE41|WNT10B|EGR1|ZBTB42|SOX2	http://amigo.geneontology.org/amigo/term/GO:0000122
cell differentiation	Gene Ontology	GO:0030154	5	395	0.467487	0.553603	WIPF3|BHLHE41|CATSPERG|KLRK1|ROBO4	http://amigo.geneontology.org/amigo/term/GO:0030154
apoptotic process	Gene Ontology	GO:0006915	7	605	0.534983	0.617288	FAIM2|TRAF1|CLSPN|BIRC7|PLEC|PRKD1|PDCD1	http://amigo.geneontology.org/amigo/term/GO:0006915
negative regulation of transcription, DNA-dependent	Gene Ontology	GO:0045892	5	464	0.610499	0.686812	BHLHE41|CDKN2A|LHX1|ZBED6|FOXD1	http://amigo.geneontology.org/amigo/term/GO:0045892
innate immune response	Gene Ontology	GO:0045087	8	754	0.629514	0.69093	KLRC2|KLRK1|CARD11|MAPK11|WIPF3|ITPR3|PRKD1|TNRC6B	http://amigo.geneontology.org/amigo/term/GO:0045087
transmembrane transport	Gene Ontology	GO:0055085	6	578	0.646495	0.692673	SLC9A3|SLC25A21|ABCA3|SLC4A3|SLC9B1|CLCNKB	http://amigo.geneontology.org/amigo/term/GO:0055085
positive regulation of transcription, DNA-dependent	Gene Ontology	GO:0045893	5	503	0.68085	0.712518	SOX2|LHX1|CDKN2A|TBX1|EGR1	http://amigo.geneontology.org/amigo/term/GO:0045893
gene expression	Gene Ontology	GO:0010467	6	672	0.781013	0.798764	CDKN2B|MAML3|FMN1|LTB|TNRC6B|MAPK11	http://amigo.geneontology.org/amigo/term/GO:0010467
small molecule metabolic process	Gene Ontology	GO:0044281	10	1413	0.965514	0.965514	NHLRC1|CHST14|SDC3|IDS|CYP26B1|SLC25A21|HELZ2|ITPR3|PLA2G4B|PRKD1	http://amigo.geneontology.org/amigo/term/GO:0044281
#fg	170
#bg	14960
##Statistical test method: hypergeometric test
##FDR correction method: Benjamini and Hochberg
