# Supplementary material for: PAIP1 regulates expression of immune and inflammatory response associated genes at transcript level in liver cancer cell
Source: PeerJ. 2023 Apr 21;11:e15070. doi: 10.7717/peerj.15070 (PMC10124545; doi:10.7717/peerj.15070)
Supplement: Supplemental Information 8 [file peerj-11-15070-s008.xlsx]

## Sheet: Table S8
Table S8 GO biology process terms of PAIP1-knockdown downregulated genes
#Term	Database	ID	Input number	Background number	P-Value	Corrected P-Value	Input	Hyperlink
steroid metabolic process	Gene Ontology	GO:0008202	10	57	3.29404e-11	1.08703e-09	MSMO1|AKR1B10|CYP2D6|CYP2B6|CYP19A1|G6PC|CYP2E1|CYP17A1|SULT2B1|AKR1C2	http://amigo.geneontology.org/amigo/term/GO:0008202
immune response	Gene Ontology	GO:0006955	15	476	9.21323e-06	0.00010492	IL18|IL1RN|CTSS|CCL14|HAMP|TNFSF14|GBP2|TRIM22|C8B|PTGDR2|PTAFR|IL1RAP|CD8B|IL1R2|CCL26	http://amigo.geneontology.org/amigo/term/GO:0006955
triglyceride metabolic process	Gene Ontology	GO:0006641	5	35	9.59769e-06	0.00010492	G6PC|MTTP|ACSL6|APOC3|CYP2E1	http://amigo.geneontology.org/amigo/term/GO:0006641
acute-phase response	Gene Ontology	GO:0006953	5	37	1.27176e-05	0.00010492	IL1RN|HP|SAA4|SERPINA3|SERPINF2	http://amigo.geneontology.org/amigo/term/GO:0006953
small molecule metabolic process	Gene Ontology	GO:0044281	27	1413	2.87727e-05	0.000158389	MSMO1|ACP5|BAAT|CYP17A1|APOC3|UPB1|SLC52A3|G6PC|CYP2D6|DAO|CYP2B6|MTTP|DIO1|SACM1L|HAL|PTGR1|PLA2G2A|CYP3A7|PTGES|ALDOB|BCAN|CYP19A1|ACSL6|CYP2E1|ANGPTL4|SULT2B1|HAO1	http://amigo.geneontology.org/amigo/term/GO:0044281
xenobiotic metabolic process	Gene Ontology	GO:0006805	8	146	2.87979e-05	0.000158389	CYP2D6|CYP19A1|CYP2B6|CYP2E1|CYP17A1|SULT2B1|CYP3A7|AKR1C1	http://amigo.geneontology.org/amigo/term/GO:0006805
inflammatory response	Gene Ontology	GO:0006954	11	307	4.90409e-05	0.000231193	IL18|AOC3|SERPINA3|STAB1|IL23A|KNG1|ITGAL|APOC3|IL1RAP|PTAFR|CCL26	http://amigo.geneontology.org/amigo/term/GO:0006954
proteolysis	Gene Ontology	GO:0006508	9	211	6.51066e-05	0.000268565	PGC|TMPRSS2|MMP19|CTSZ|PCOLCE|MMP7|CTSS|DPP4|PROZ	http://amigo.geneontology.org/amigo/term/GO:0006508
digestion	Gene Ontology	GO:0007586	5	55	9.01015e-05	0.000330372	PPARGC1A|AKR1B10|AKR1C1|AKR1C2|PGC	http://amigo.geneontology.org/amigo/term/GO:0007586
cholesterol homeostasis	Gene Ontology	GO:0042632	5	59	0.000126287	0.000416747	LIPC|MTTP|G6PC|APOC3|AKR1C1	http://amigo.geneontology.org/amigo/term/GO:0042632
angiogenesis	Gene Ontology	GO:0001525	8	206	0.000317164	0.000951493	IL18|ECSCR|MMP19|EPHA1|EGFL7|ANGPTL4|PTPRB|TBX4	http://amigo.geneontology.org/amigo/term/GO:0001525
negative regulation of endopeptidase activity	Gene Ontology	GO:0010951	5	90	0.000903878	0.00248566	SERPINB2|KNG1|SERPINA3|SERPINB5|SERPINF2	http://amigo.geneontology.org/amigo/term/GO:0010951
response to drug	Gene Ontology	GO:0042493	9	305	0.00098888	0.00251023	IL1RN|CCND1|CYP2E1|CRYAA|CYP17A1|APOC3|MMP7|SPINK4|LCK	http://amigo.geneontology.org/amigo/term/GO:0042493
oxidation-reduction process	Gene Ontology	GO:0055114	6	144	0.00126167	0.00297393	STAB1|CYP2D6|CYP2B6|CYP2E1|AKR1C1|AKR1C2	http://amigo.geneontology.org/amigo/term/GO:0055114
extracellular matrix disassembly	Gene Ontology	GO:0022617	5	112	0.00238836	0.00525438	BCAN|MMP7|CTSS|ELN|MMP19	http://amigo.geneontology.org/amigo/term/GO:0022617
cytokine-mediated signaling pathway	Gene Ontology	GO:0019221	7	229	0.0029759	0.0061378	SOCS3|GBP2|IL1R2|PTAFR|IL22RA1|EDN2|EBI3	http://amigo.geneontology.org/amigo/term/GO:0019221
transmembrane transport	Gene Ontology	GO:0055085	11	578	0.00856669	0.0166295	G6PC|SLC40A1|SLC7A7|SLC6A9|SLC7A10|SLC22A7|SLC5A11|TRPV4|SLC6A12|SLC22A9|FXYD3	http://amigo.geneontology.org/amigo/term/GO:0055085
positive regulation of cell proliferation	Gene Ontology	GO:0008284	9	429	0.00940641	0.0172451	CCL14|RAB25|KLB|MZB1|EPHA1|KRT6A|EDN2|DPP4|AKR1C2	http://amigo.geneontology.org/amigo/term/GO:0008284
extracellular matrix organization	Gene Ontology	GO:0030198	7	312	0.015199	0.0263983	BCAN|ELN|MMP19|ITGAL|MMP7|CTSS|SERPINB5	http://amigo.geneontology.org/amigo/term/GO:0030198
blood coagulation	Gene Ontology	GO:0007596	9	469	0.0160754	0.0265244	PROZ|SLC7A7|KNG1|SLC7A10|ITGAL|SERPINF2|PRKG1|SERPINB2|LCK	http://amigo.geneontology.org/amigo/term/GO:0007596
G-protein coupled receptor signaling pathway	Gene Ontology	GO:0007186	6	317	0.0484419	0.0761229	PTGDR2|RASD1|HCAR3|PTAFR|APOC3|AKR1C2	http://amigo.geneontology.org/amigo/term/GO:0007186
cell adhesion	Gene Ontology	GO:0007155	7	445	0.0769041	0.115356	BCAN|AOC3|STAB1|NINJ2|ITGAL|MYBPC1|DPP4	http://amigo.geneontology.org/amigo/term/GO:0007155
cell differentiation	Gene Ontology	GO:0030154	6	395	0.110407	0.15841	ETV2|ECSCR|MMP19|CHRDL2|ANGPTL4|KRT6A	http://amigo.geneontology.org/amigo/term/GO:0030154
apoptotic process	Gene Ontology	GO:0006915	8	605	0.129688	0.178322	ECSCR|TNFSF14|GSDMA|MZB1|SLC5A11|RNF144B|CIDEB|LCK	http://amigo.geneontology.org/amigo/term/GO:0006915
signal transduction	Gene Ontology	GO:0007165	12	1045	0.156894	0.2071	VLDLR|RASD1|TNFSF14|PRR5-ARHGAP8|LGALS9|IGFBP1|ITGAL|SIT1|PRKG1|PTGES|TSPAN8|CCL26	http://amigo.geneontology.org/amigo/term/GO:0007165
transport	Gene Ontology	GO:0006810	5	349	0.164157	0.208353	SLC7A7|SLC6A9|SLC6A12|MFSD2B|PDZK1	http://amigo.geneontology.org/amigo/term/GO:0006810
carbohydrate metabolic process	Gene Ontology	GO:0005975	5	354	0.170944	0.208931	BCAN|DHDH|ALDOB|G6PC|KLB	http://amigo.geneontology.org/amigo/term/GO:0005975
negative regulation of apoptotic process	Gene Ontology	GO:0043066	6	475	0.20175	0.237776	IL1RN|SLC40A1|SOCS3|CRYAA|ANGPTL4|SERPINB2	http://amigo.geneontology.org/amigo/term/GO:0043066
cellular protein metabolic process	Gene Ontology	GO:0044267	6	530	0.276575	0.314723	MUC3A|PROZ|TUBB1|CTSZ|IGFBP1|ACE2	http://amigo.geneontology.org/amigo/term/GO:0044267
innate immune response	Gene Ontology	GO:0045087	6	754	0.599315	0.659246	KLB|IL23A|PGLYRP2|C8B|CTSS|LCK	http://amigo.geneontology.org/amigo/term/GO:0045087
positive regulation of transcription from RNA polymerase II promoter	Gene Ontology	GO:0045944	5	749	0.750047	0.798438	MYCN|ETV2|PPARGC1A|IL23A|SERPINF2	http://amigo.geneontology.org/amigo/term/GO:0045944
regulation of transcription, DNA-dependent	Gene Ontology	GO:0006355	6	1305	0.964928	0.990007	CSDC2|ZNF320|PPARGC1A|TRIM22|TBX4|ZNF22	http://amigo.geneontology.org/amigo/term/GO:0006355
transcription, DNA-dependent	Gene Ontology	GO:0006351	8	1857	0.990007	0.990007	RIPPLY1|ZNF320|CCND1|TRIM22|TBX10|CREB3L3|TBX4|ZNF22	http://amigo.geneontology.org/amigo/term/GO:0006351
#fg	124
#bg	14960
##Statistical test method: hypergeometric test
##FDR correction method: Benjamini and Hochberg
