# Supplementary material for: PAIP1 regulates expression of immune and inflammatory response associated genes at transcript level in liver cancer cell
Source: PeerJ. 2023 Apr 21;11:e15070. doi: 10.7717/peerj.15070 (PMC10124545; doi:10.7717/peerj.15070)
Supplement: Supplemental Information 9 [file peerj-11-15070-s009.xlsx]

## Sheet: Table S9
Table S9 Reactome pathways of PAIP1-knockdown upregulated genes
Pathway identifier	Pathway name	#Entities found	#Entities total	Entities ratio	Entities pValue	Entities FDR	#Reactions found	#Reactions total	Reactions ratio	Species identifier	Species name	Submitted entities found	Mapped entities	Found reaction identifiers	PathwayBrowser
R-HSA-2559580	Oxidative Stress Induced Senescence	16	114	0.00774404	9.16868e-05	0.0694069	19	40	0.00302366	9606	Homo sapiens	CDKN2B;HIST1H2BO;CDKN2A;MAPK11;HIST1H4B;HIST4H4;HIST1H4H;HIST1H2BG;HIST1H3B;HIST1H4C;HIST1H2BD;HIST1H4E;TNRC6B		R-HSA-182594;R-HSA-6804998;R-HSA-3229138;R-HSA-6804996;R-HSA-3238999;R-HSA-3209111;R-HSA-450222;R-HSA-6804879;R-HSA-3209114;R-HSA-3209151;R-HSA-3229089;R-HSA-3222593;R-HSA-3223200;R-HSA-3240295;R-HSA-3239014;R-HSA-3239019;R-HSA-450333;R-HSA-9645672;R-HSA-3229102	https://reactome.org/PathwayBrowser/#/R-HSA-2559580
R-HSA-2559585	Oncogene Induced Senescence	8	42	0.00285307	0.000782122	0.2199	13	19	0.00143624	9606	Homo sapiens	CDKN2B;CDKN2A;TNRC6B		R-HSA-182594;R-HSA-6804998;R-HSA-6804996;R-HSA-8979082;R-HSA-3209109;R-HSA-3209111;R-HSA-3200023;R-HSA-6804879;R-HSA-3209114;R-HSA-3209151;R-HSA-3209096;R-HSA-3209098;R-HSA-9645672	https://reactome.org/PathwayBrowser/#/R-HSA-2559585
R-HSA-73728	RNA Polymerase I Promoter Opening	7	34	0.00230963	0.00105759	0.2199	1	2	0.000151183	9606	Homo sapiens	HIST1H2BO;HIST1H4B;HIST4H4;HIST1H4H;HIST1H2BG;HIST1H3B;HIST1H4C;HIST1H2BD;HIST1H4E		R-HSA-73718	https://reactome.org/PathwayBrowser/#/R-HSA-73728
R-HSA-3214815	HDACs deacetylate histones	10	67	0.00455132	0.00116349	0.2199	4	5	0.000377958	9606	Homo sapiens	HIST1H2BO;HIST1H4B;HIST4H4;HIST2H2AB;HIST1H4H;HIST1H2AG;HIST1H2BG;HIST1H3B;HIST1H4C;HIST2H2BF;HIST1H2BD;HIST1H4E		R-HSA-3777129;R-HSA-3782637;R-HSA-3782655;R-HSA-3769447	https://reactome.org/PathwayBrowser/#/R-HSA-3214815
R-HSA-5334118	DNA methylation	7	36	0.00244549	0.00146143	0.220675	7	7	0.000529141	9606	Homo sapiens	HIST1H2BO;HIST1H4B;HIST4H4;HIST1H4H;HIST1H2BG;HIST1H3B;HIST1H4C;HIST1H2BD;HIST1H4E		R-HSA-5334097;R-HSA-5334160;R-HSA-5334099;R-HSA-5334179;R-HSA-5334164;R-HSA-5334151;R-HSA-5334152	https://reactome.org/PathwayBrowser/#/R-HSA-5334118
R-HSA-2559582	Senescence-Associated Secretory Phenotype (SASP)	11	91	0.00618165	0.00344022	0.402155	5	22	0.00166301	9606	Homo sapiens	CDKN2B;HIST1H2BO;HIST1H4B;CDKN2A;HIST4H4;HIST1H4H;HIST1H2BG;HIST1H3B;HIST1H4C;HIST1H2BD;HIST1H4E		R-HSA-3788745;R-HSA-182594;R-HSA-3788748;R-HSA-3857345;R-HSA-3857348	https://reactome.org/PathwayBrowser/#/R-HSA-2559582
R-HSA-212300	PRC2 methylates histones and DNA	7	44	0.00298893	0.00438658	0.402155	4	4	0.000302366	9606	Homo sapiens	HIST1H2BO;HIST1H4B;HIST4H4;HIST1H4H;HIST1H2BG;HIST1H3B;HIST1H4C;HIST1H2BD;HIST1H4E		R-HSA-212263;R-HSA-212222;R-HSA-212269;R-HSA-212252	https://reactome.org/PathwayBrowser/#/R-HSA-212300
R-HSA-427359	SIRT1 negatively regulates rRNA expression	7	45	0.00305686	0.00494215	0.402155	3	5	0.000377958	9606	Homo sapiens	HIST1H2BO;HIST1H4B;HIST4H4;HIST1H4H;HIST1H2BG;HIST1H3B;HIST1H4C;HIST1H2BD;HIST1H4E		R-HSA-427527;R-HSA-427514;R-HSA-427528	https://reactome.org/PathwayBrowser/#/R-HSA-427359
R-HSA-171306	Packaging Of Telomere Ends	6	34	0.00230963	0.00499391	0.402155	2	2	0.000151183	9606	Homo sapiens	HIST1H2BO;HIST1H4B;HIST4H4;HIST1H4H;HIST1H2BG;HIST1H4C;HIST1H2BD;HIST1H4E		R-HSA-181450;R-HSA-176700	https://reactome.org/PathwayBrowser/#/R-HSA-171306
R-HSA-2559583	Cellular Senescence	18	200	0.013586	0.00536207	0.402155	30	90	0.00680324	9606	Homo sapiens	CDKN2B;HIST1H2BO;CDKN2A;MAPK11;HIST1H4B;HIST4H4;HIST1H1E;HIST1H4H;HIST1H2BG;HIST1H3B;HIST1H4C;HIST1H2BD;HIST1H4E;TNRC6B		R-HSA-182594;R-HSA-8979082;R-HSA-3209151;R-HSA-3229089;R-HSA-3223200;R-HSA-3785711;R-HSA-3240295;R-HSA-3239014;R-HSA-3239019;R-HSA-450333;R-HSA-3229102;R-HSA-6804998;R-HSA-3229138;R-HSA-6804996;R-HSA-3209109;R-HSA-3238999;R-HSA-3209111;R-HSA-3200023;R-HSA-450222;R-HSA-6804879;R-HSA-3209114;R-HSA-4647594;R-HSA-3788745;R-HSA-3222593;R-HSA-3788748;R-HSA-3209096;R-HSA-3209098;R-HSA-9645672;R-HSA-3857…	https://reactome.org/PathwayBrowser/#/R-HSA-2559583
R-HSA-427389	ERCC6 (CSB) and EHMT2 (G9a) positively regulate rRNA expression	7	48	0.00326065	0.00692809	0.47111	2	4	0.000302366	9606	Homo sapiens	HIST1H2BO;HIST1H4B;HIST4H4;HIST1H4H;HIST1H2BG;HIST1H3B;HIST1H4C;HIST1H2BD;HIST1H4E		R-HSA-427383;R-HSA-427336	https://reactome.org/PathwayBrowser/#/R-HSA-427389
R-HSA-5625886	Activated PKN1 stimulates transcription of AR (androgen receptor) regulated genes KLK2 and KLK3	7	49	0.00332858	0.0077059	0.485472	8	11	0.000831507	9606	Homo sapiens	HIST1H2BO;HIST1H4B;HIST4H4;HIST1H4H;HIST1H2BG;HIST1H3B;HIST1H4C;HIST1H2BD;HIST1H4E		R-HSA-5625797;R-HSA-5625796;R-HSA-5625870;R-HSA-5625774;R-HSA-5625849;R-HSA-5625848;R-HSA-5625784;R-HSA-5625883	https://reactome.org/PathwayBrowser/#/R-HSA-5625886
R-HSA-110330	Recognition and association of DNA glycosylase with site containing an affected purine	6	39	0.00264928	0.00944077	0.535729	2	10	0.000755915	9606	Homo sapiens	HIST1H2BO;HIST1H4B;HIST4H4;HIST1H4H;HIST1H2BG;HIST1H4C;HIST1H2BD;HIST1H4E		R-HSA-9629195;R-HSA-9629373	https://reactome.org/PathwayBrowser/#/R-HSA-110330
R-HSA-8936459	RUNX1 regulates genes involved in megakaryocyte differentiation and platelet function	9	78	0.00529855	0.0102542	0.535729	20	33	0.00249452	9606	Homo sapiens	KMT2D;HIST1H2BO;HIST1H4B;HIST4H4;HIST1H4H;HIST1H2BG;HIST1H3B;HIST1H4C;HIST1H2BD;HIST1H4E;TNRC6B		R-HSA-8936584;R-HSA-8936616;R-HSA-8937097;R-HSA-8937037;R-HSA-8936621;R-HSA-8936608;R-HSA-8936481;R-HSA-8936995;R-HSA-8937016;R-HSA-8937113;R-HSA-8937050;R-HSA-8935740;R-HSA-8936989;R-HSA-8937118;R-HSA-8937022;R-HSA-8935730;R-HSA-8936979;R-HSA-8935731;R-HSA-8936628;R-HSA-8936599	https://reactome.org/PathwayBrowser/#/R-HSA-8936459
R-HSA-198725	Nuclear Events (kinase and transcription factor activation)	9	80	0.00543441	0.0119181	0.535729	27	48	0.00362839	9606	Homo sapiens	EGR1;MAPK11;DYRK3;EGR3;EGR4;VGF		R-HSA-9613202;R-HSA-9031624;R-HSA-9613207;R-HSA-9613210;R-HSA-9031616;R-HSA-198669;R-HSA-9612483;R-HSA-9621386;R-HSA-9621385;R-HSA-9612493;R-HSA-9621042;R-HSA-9620723;R-HSA-9620663;R-HSA-9621048;R-HSA-9621054;R-HSA-199917;R-HSA-9612514;R-HSA-9613219;R-HSA-9612516;R-HSA-9621035;R-HSA-9621032;R-HSA-9612073;R-HSA-9616105;R-HSA-9616110;R-HSA-9616367;R-HSA-9612076;R-HSA-9620717	https://reactome.org/PathwayBrowser/#/R-HSA-198725
R-HSA-201722	Formation of the beta-catenin:TCF transactivating complex	8	67	0.00455132	0.012491	0.535729	3	13	0.00098269	9606	Homo sapiens	KMT2D;HIST1H2BO;HIST1H4B;HIST4H4;HIST1H4H;HIST1H2BG;HIST1H3B;HIST1H4C;HIST1H2BD;HIST1H4E		R-HSA-3364026;R-HSA-3364014;R-HSA-3451147	https://reactome.org/PathwayBrowser/#/R-HSA-201722
R-HSA-110328	Recognition and association of DNA glycosylase with site containing an affected pyrimidine	6	42	0.00285307	0.0131749	0.535729	1	21	0.00158742	9606	Homo sapiens	HIST1H2BO;HIST1H4B;HIST4H4;HIST1H4H;HIST1H2BG;HIST1H4C;HIST1H2BD;HIST1H4E		R-HSA-9629372	https://reactome.org/PathwayBrowser/#/R-HSA-110328
R-HSA-2299718	Condensation of Prophase Chromosomes	7	55	0.00373616	0.0137862	0.535729	8	10	0.000755915	9606	Homo sapiens	HIST1H2BO;HIST1H4B;HIST4H4;HIST1H4H;HIST1H2BG;HIST1H3B;HIST1H4C;HIST1H2BD;HIST1H4E		R-HSA-2245218;R-HSA-2288097;R-HSA-2301205;R-HSA-2294580;R-HSA-2172678;R-HSA-2294600;R-HSA-2294574;R-HSA-2294590	https://reactome.org/PathwayBrowser/#/R-HSA-2299718
R-HSA-9630747	Diseases of Cellular Senescence	2	4	0.000271721	0.0145509	0.535729	3	3	0.000226775	9606	Homo sapiens	CDKN2A		R-HSA-9646295;R-HSA-9630795;R-HSA-9630792	https://reactome.org/PathwayBrowser/#/R-HSA-9630747
R-HSA-9675132	Diseases of cellular response to stress	2	4	0.000271721	0.0145509	0.535729	3	3	0.000226775	9606	Homo sapiens	CDKN2A		R-HSA-9646295;R-HSA-9630795;R-HSA-9630792	https://reactome.org/PathwayBrowser/#/R-HSA-9675132
R-HSA-9031628	NGF-stimulated transcription	7	56	0.00380409	0.0150608	0.535729	25	37	0.00279689	9606	Homo sapiens	EGR1;EGR3;EGR4;VGF		R-HSA-9613202;R-HSA-9031624;R-HSA-9613207;R-HSA-9613210;R-HSA-9031616;R-HSA-9612483;R-HSA-9621386;R-HSA-9621385;R-HSA-9612493;R-HSA-9621042;R-HSA-9620723;R-HSA-9620663;R-HSA-9621048;R-HSA-9621054;R-HSA-9612514;R-HSA-9613219;R-HSA-9612516;R-HSA-9621035;R-HSA-9621032;R-HSA-9612073;R-HSA-9616105;R-HSA-9616110;R-HSA-9616367;R-HSA-9612076;R-HSA-9620717	https://reactome.org/PathwayBrowser/#/R-HSA-9031628
R-HSA-5693571	Nonhomologous End-Joining (NHEJ)	7	57	0.00387202	0.0164171	0.535729	4	13	0.00098269	9606	Homo sapiens	HIST1H2BO;HIST1H4B;HERC2;HIST4H4;HIST1H4H;HIST1H2BG;HIST1H4C;HIST1H2BD;HIST1H4E		R-HSA-5686900;R-HSA-5686704;R-HSA-5693599;R-HSA-5686685	https://reactome.org/PathwayBrowser/#/R-HSA-5693571
R-HSA-110331	Cleavage of the damaged purine	6	45	0.00305686	0.0178368	0.535729	2	9	0.000680324	9606	Homo sapiens	HIST1H2BO;HIST1H4B;HIST4H4;HIST1H4H;HIST1H2BG;HIST1H4C;HIST1H2BD;HIST1H4E		R-HSA-9629216;R-HSA-9629483	https://reactome.org/PathwayBrowser/#/R-HSA-110331
R-HSA-912446	Meiotic recombination	7	58	0.00393995	0.0178576	0.535729	4	9	0.000680324	9606	Homo sapiens	HIST1H2BO;HIST1H4B;HIST4H4;HIST1H4H;HIST1H2BG;HIST1H3B;HIST1H4C;HIST1H2BD;HIST1H4E		R-HSA-912458;R-HSA-912503;R-HSA-912496;R-HSA-1214188	https://reactome.org/PathwayBrowser/#/R-HSA-912446
R-HSA-73927	Depurination	6	46	0.00312479	0.0196134	0.568788	4	19	0.00143624	9606	Homo sapiens	HIST1H2BO;HIST1H4B;HIST4H4;HIST1H4H;HIST1H2BG;HIST1H4C;HIST1H2BD;HIST1H4E		R-HSA-9629216;R-HSA-9629483;R-HSA-9629195;R-HSA-9629373	https://reactome.org/PathwayBrowser/#/R-HSA-73927
R-HSA-1912408	Pre-NOTCH Transcription and Translation	9	89	0.00604578	0.0219793	0.588239	19	28	0.00211656	9606	Homo sapiens	HIST1H2BO;HIST1H4B;HIST4H4;HIST1H4H;HIST1H2BG;MAML3;HIST1H3B;HIST1H4C;HIST1H2BD;HIST1H4E;TNRC6B		R-HSA-1912413;R-HSA-1912412;R-HSA-1912415;R-HSA-9017835;R-HSA-1606682;R-HSA-1912409;R-HSA-1912410;R-HSA-1912406;R-HSA-9604831;R-HSA-1912368;R-HSA-9604829;R-HSA-9604834;R-HSA-1912364;R-HSA-1912367;R-HSA-1912366;R-HSA-1912363;R-HSA-1912362;R-HSA-1606561;R-HSA-1912416	https://reactome.org/PathwayBrowser/#/R-HSA-1912408
R-HSA-9670095	Inhibition of DNA recombination at telomere	6	48	0.00326065	0.0235199	0.588239	3	4	0.000302366	9606	Homo sapiens	HIST1H2BO;HIST1H4B;HIST4H4;HIST1H4H;HIST1H2BG;HIST1H4C;HIST1H2BD;HIST1H4E		R-HSA-9670114;R-HSA-9670149;R-HSA-9670101	https://reactome.org/PathwayBrowser/#/R-HSA-9670095
R-HSA-1221632	Meiotic synapsis	7	62	0.00421167	0.02451	0.588239	4	6	0.000453549	9606	Homo sapiens	HIST1H2BO;HIST1H4B;HIST4H4;HIST1H4H;HIST1H2BG;HIST1H4C;HIST1H2BD;SYNE2;HIST1H4E		R-HSA-912408;R-HSA-912470;R-HSA-912467;R-HSA-912450	https://reactome.org/PathwayBrowser/#/R-HSA-1221632
R-HSA-5250924	B-WICH complex positively regulates rRNA expression	7	62	0.00421167	0.02451	0.588239	1	3	0.000226775	9606	Homo sapiens	HIST1H2BO;HIST1H4B;HIST4H4;HIST1H4H;HIST1H2BG;HIST1H3B;HIST1H4C;HIST1H2BD;HIST1H4E		R-HSA-5250938	https://reactome.org/PathwayBrowser/#/R-HSA-5250924
R-HSA-73772	RNA Polymerase I Promoter Escape	7	64	0.00434753	0.0284013	0.645021	1	2	0.000151183	9606	Homo sapiens	HIST1H2BO;HIST1H4B;HIST4H4;HIST1H4H;HIST1H2BG;HIST1H3B;HIST1H4C;HIST1H2BD;HIST1H4E		R-HSA-74986	https://reactome.org/PathwayBrowser/#/R-HSA-73772
R-HSA-110329	Cleavage of the damaged pyrimidine	6	51	0.00346444	0.0303052	0.645021	1	20	0.00151183	9606	Homo sapiens	HIST1H2BO;HIST1H4B;HIST4H4;HIST1H4H;HIST1H2BG;HIST1H4C;HIST1H2BD;HIST1H4E		R-HSA-9629497	https://reactome.org/PathwayBrowser/#/R-HSA-110329
R-HSA-73928	Depyrimidination	6	51	0.00346444	0.0303052	0.645021	2	41	0.00309925	9606	Homo sapiens	HIST1H2BO;HIST1H4B;HIST4H4;HIST1H4H;HIST1H2BG;HIST1H4C;HIST1H2BD;HIST1H4E		R-HSA-9629497;R-HSA-9629372	https://reactome.org/PathwayBrowser/#/R-HSA-73928
R-HSA-3214847	HATs acetylate histones	10	110	0.00747232	0.0307153	0.645021	13	15	0.00113387	9606	Homo sapiens	HIST1H2BO;HIST1H4B;HIST4H4;HIST2H2AB;HIST1H4H;HIST1H2AG;HIST1H2BG;HIST1H3B;HIST1H4C;HIST2H2BF;HIST1H2BD;HIST1H4E		R-HSA-3318486;R-HSA-3321975;R-HSA-3301237;R-HSA-3662335;R-HSA-3697008;R-HSA-3321883;R-HSA-5144542;R-HSA-3301345;R-HSA-3697920;R-HSA-3662318;R-HSA-3318415;R-HSA-3321805;R-HSA-3318413	https://reactome.org/PathwayBrowser/#/R-HSA-3214847
R-HSA-5625740	RHO GTPases activate PKNs	8	80	0.00543441	0.0314542	0.660538	9	20	0.00151183	9606	Homo sapiens	HIST1H2BO;HIST1H4B;HIST4H4;MYH9;HIST1H4H;HIST1H2BG;HIST1H3B;HIST1H4C;HIST1H2BD;HIST1H4E		R-HSA-5625797;R-HSA-5625796;R-HSA-419232;R-HSA-5625870;R-HSA-5625774;R-HSA-5625849;R-HSA-5625848;R-HSA-5625784;R-HSA-5625883	https://reactome.org/PathwayBrowser/#/R-HSA-5625740
R-HSA-5693565	Recruitment and ATM-mediated phosphorylation of repair and signaling proteins at DNA double strand breaks	7	67	0.00455132	0.0349894	0.699788	29	39	0.00294807	9606	Homo sapiens	HIST1H2BO;HIST1H4B;HERC2;HIST4H4;HIST1H4H;HIST1H2BG;HIST1H4C;HIST1H2BD;HIST1H4E		R-HSA-5683735;R-HSA-5682967;R-HSA-69891;R-HSA-5682965;R-HSA-5683986;R-HSA-5682588;R-HSA-5682586;R-HSA-5683930;R-HSA-5683801;R-HSA-5682629;R-HSA-5683077;R-HSA-5693583;R-HSA-5683405;R-HSA-5682992;R-HSA-5693566;R-HSA-5683967;R-HSA-5683964;R-HSA-5683384;R-HSA-5683385;R-HSA-5682598;R-HSA-5682983;R-HSA-5693602;R-HSA-5693536;R-HSA-5683425;R-HSA-5682607;R-HSA-5682863;R-HSA-5693551;R-HSA-5693549;R-HSA-568…	https://reactome.org/PathwayBrowser/#/R-HSA-5693565
R-HSA-774815	Nucleosome assembly	6	54	0.00366823	0.0382591	0.726922	3	4	0.000302366	9606	Homo sapiens	HIST1H2BO;HIST1H4B;HIST4H4;HIST1H4H;HIST1H2BG;HIST1H4C;HIST1H2BD;HIST1H4E		R-HSA-606287;R-HSA-606289;R-HSA-606326	https://reactome.org/PathwayBrowser/#/R-HSA-774815
R-HSA-606279	Deposition of new CENPA-containing nucleosomes at the centromere	6	54	0.00366823	0.0382591	0.726922	3	4	0.000302366	9606	Homo sapiens	HIST1H2BO;HIST1H4B;HIST4H4;HIST1H4H;HIST1H2BG;HIST1H4C;HIST1H2BD;HIST1H4E		R-HSA-606287;R-HSA-606289;R-HSA-606326	https://reactome.org/PathwayBrowser/#/R-HSA-606279
R-HSA-9646303	Evasion of Oncogene Induced Senescence Due to p14ARF Defects	1	1	6.79302e-05	0.0442997	0.769141	1	1	7.55915e-05	9606	Homo sapiens	CDKN2A		R-HSA-9646295	https://reactome.org/PathwayBrowser/#/R-HSA-9646303
R-HSA-9646304	Evasion of Oxidative Stress Induced Senescence Due to p14ARF Defects	1	1	6.79302e-05	0.0442997	0.769141	1	1	7.55915e-05	9606	Homo sapiens	CDKN2A		R-HSA-9646295	https://reactome.org/PathwayBrowser/#/R-HSA-9646304
R-HSA-2559586	DNA Damage/Telomere Stress Induced Senescence	7	71	0.00482304	0.0452436	0.769141	2	18	0.00136065	9606	Homo sapiens	HIST1H2BO;HIST1H4B;HIST4H4;HIST1H1E;HIST1H4H;HIST1H2BG;HIST1H4C;HIST1H2BD;HIST1H4E		R-HSA-3785711;R-HSA-4647594	https://reactome.org/PathwayBrowser/#/R-HSA-2559586
R-HSA-9616222	Transcriptional regulation of granulopoiesis	7	71	0.00482304	0.0452436	0.769141	1	27	0.00204097	9606	Homo sapiens	HIST1H2BO;HIST1H4B;HIST4H4;HIST1H4H;HIST1H2BG;HIST1H3B;HIST1H4C;HIST1H2BD;HIST1H4E		R-HSA-8865505	https://reactome.org/PathwayBrowser/#/R-HSA-9616222
R-HSA-8948216	Collagen chain trimerization	5	44	0.00298893	0.0518095	0.804684	5	28	0.00211656	9606	Homo sapiens	COL5A1;COL7A1;COL9A2		R-HSA-8944250;R-HSA-8944223;R-HSA-8944255;R-HSA-8944240;R-HSA-8944229	https://reactome.org/PathwayBrowser/#/R-HSA-8948216
R-HSA-5693607	Processing of DNA double-strand break ends	8	90	0.00611372	0.0553402	0.804684	4	17	0.00128506	9606	Homo sapiens	HIST1H2BO;HIST1H4B;HERC2;HIST4H4;HIST1H4H;HIST1H2BG;CLSPN;HIST1H4C;HIST1H2BD;HIST1H4E		R-HSA-5684071;R-HSA-5684887;R-HSA-5684052;R-HSA-5684882	https://reactome.org/PathwayBrowser/#/R-HSA-5693607
R-HSA-5693606	DNA Double Strand Break Response	7	75	0.00509476	0.0572499	0.804684	29	48	0.00362839	9606	Homo sapiens	HIST1H2BO;HIST1H4B;HERC2;HIST4H4;HIST1H4H;HIST1H2BG;HIST1H4C;HIST1H2BD;HIST1H4E		R-HSA-5683735;R-HSA-5682967;R-HSA-69891;R-HSA-5682965;R-HSA-5683986;R-HSA-5682588;R-HSA-5682586;R-HSA-5683930;R-HSA-5683801;R-HSA-5682629;R-HSA-5683077;R-HSA-5693583;R-HSA-5683405;R-HSA-5682992;R-HSA-5693566;R-HSA-5683967;R-HSA-5683964;R-HSA-5683384;R-HSA-5683385;R-HSA-5682598;R-HSA-5682983;R-HSA-5693602;R-HSA-5693536;R-HSA-5683425;R-HSA-5682607;R-HSA-5682863;R-HSA-5693551;R-HSA-5693549;R-HSA-568…	https://reactome.org/PathwayBrowser/#/R-HSA-5693606
R-HSA-5693567	HDR through Homologous Recombination (HRR) or Single Strand Annealing (SSA)	10	124	0.00842334	0.0593521	0.804684	16	42	0.00317484	9606	Homo sapiens	HIST1H2BO;HIST1H4B;HERC2;EME2;HIST4H4;HIST1H4H;HIST1H2BG;CLSPN;HIST1H4C;HIST1H2BD;HIST1H4E;PLEC		R-HSA-5684887;R-HSA-5684052;R-HSA-5693620;R-HSA-5693589;R-HSA-5684882;R-HSA-5686483;R-HSA-5693584;R-HSA-5686430;R-HSA-5693593;R-HSA-5684071;R-HSA-5686469;R-HSA-5693539;R-HSA-5685838;R-HSA-5686410;R-HSA-5686475;R-HSA-5686440	https://reactome.org/PathwayBrowser/#/R-HSA-5693567
R-HSA-1650814	Collagen biosynthesis and modifying enzymes	7	76	0.00516269	0.0605316	0.804684	26	51	0.00385517	9606	Homo sapiens	FMNL1;COL5A1;COL7A1;KLHL11;COL9A2		R-HSA-8948232;R-HSA-2002460;R-HSA-8948234;R-HSA-8948224;R-HSA-8948226;R-HSA-8948228;R-HSA-8948230;R-HSA-8948231;R-HSA-1981128;R-HSA-2002440;R-HSA-8944223;R-HSA-1980233;R-HSA-1981120;R-HSA-1650808;R-HSA-2002428;R-HSA-2022073;R-HSA-2089971;R-HSA-8944229;R-HSA-1981104;R-HSA-8944250;R-HSA-8948219;R-HSA-2152276;R-HSA-8948222;R-HSA-8944255;R-HSA-8944240;R-HSA-1981157	https://reactome.org/PathwayBrowser/#/R-HSA-1650814
R-HSA-1500620	Meiosis	8	92	0.00624958	0.0612074	0.804684	8	15	0.00113387	9606	Homo sapiens	HIST1H2BO;HIST1H4B;HIST4H4;HIST1H4H;HIST1H2BG;HIST1H3B;HIST1H4C;HIST1H2BD;SYNE2;HIST1H4E		R-HSA-912408;R-HSA-912458;R-HSA-912503;R-HSA-912470;R-HSA-912496;R-HSA-912467;R-HSA-1214188;R-HSA-912450	https://reactome.org/PathwayBrowser/#/R-HSA-1500620
R-HSA-73929	Base-Excision Repair, AP Site Formation	6	62	0.00421167	0.065508	0.804684	6	62	0.00468667	9606	Homo sapiens	HIST1H2BO;HIST1H4B;HIST4H4;HIST1H4H;HIST1H2BG;HIST1H4C;HIST1H2BD;HIST1H4E		R-HSA-9629216;R-HSA-9629483;R-HSA-9629195;R-HSA-9629497;R-HSA-9629372;R-HSA-9629373	https://reactome.org/PathwayBrowser/#/R-HSA-73929
R-HSA-8853884	Transcriptional Regulation by VENTX	5	48	0.00326065	0.0694888	0.804684	4	13	0.00098269	9606	Homo sapiens	CDKN2A;TNRC6B		R-HSA-8853921;R-HSA-8853920;R-HSA-3209114;R-HSA-3209151	https://reactome.org/PathwayBrowser/#/R-HSA-8853884
R-HSA-427413	NoRC negatively regulates rRNA expression	7	80	0.00543441	0.0747916	0.804684	3	7	0.000529141	9606	Homo sapiens	HIST1H2BO;HIST1H4B;HIST4H4;HIST1H4H;HIST1H2BG;HIST1H3B;HIST1H4C;HIST1H2BD;HIST1H4E		R-HSA-5227490;R-HSA-433672;R-HSA-427337	https://reactome.org/PathwayBrowser/#/R-HSA-427413
R-HSA-5250913	Positive epigenetic regulation of rRNA expression	7	80	0.00543441	0.0747916	0.804684	3	7	0.000529141	9606	Homo sapiens	HIST1H2BO;HIST1H4B;HIST4H4;HIST1H4H;HIST1H2BG;HIST1H3B;HIST1H4C;HIST1H2BD;HIST1H4E		R-HSA-427383;R-HSA-5250938;R-HSA-427336	https://reactome.org/PathwayBrowser/#/R-HSA-5250913
R-HSA-1912422	Pre-NOTCH Expression and Processing	9	113	0.00767611	0.0754306	0.804684	19	38	0.00287248	9606	Homo sapiens	HIST1H2BO;HIST1H4B;HIST4H4;HIST1H4H;HIST1H2BG;MAML3;HIST1H3B;HIST1H4C;HIST1H2BD;HIST1H4E;TNRC6B		R-HSA-1912413;R-HSA-1912412;R-HSA-1912415;R-HSA-9017835;R-HSA-1606682;R-HSA-1912409;R-HSA-1912410;R-HSA-1912406;R-HSA-9604831;R-HSA-1912368;R-HSA-9604829;R-HSA-9604834;R-HSA-1912364;R-HSA-1912367;R-HSA-1912366;R-HSA-1912363;R-HSA-1912362;R-HSA-1606561;R-HSA-1912416	https://reactome.org/PathwayBrowser/#/R-HSA-1912422
R-HSA-5693538	Homology Directed Repair	10	130	0.00883092	0.0756775	0.804684	16	50	0.00377958	9606	Homo sapiens	HIST1H2BO;HIST1H4B;HERC2;EME2;HIST4H4;HIST1H4H;HIST1H2BG;CLSPN;HIST1H4C;HIST1H2BD;HIST1H4E;PLEC		R-HSA-5684887;R-HSA-5684052;R-HSA-5693620;R-HSA-5693589;R-HSA-5684882;R-HSA-5686483;R-HSA-5693584;R-HSA-5686430;R-HSA-5693593;R-HSA-5684071;R-HSA-5686469;R-HSA-5693539;R-HSA-5685838;R-HSA-5686410;R-HSA-5686475;R-HSA-5686440	https://reactome.org/PathwayBrowser/#/R-HSA-5693538
R-HSA-447041	CHL1 interactions	2	10	0.000679302	0.0762751	0.804684	2	5	0.000377958	9606	Homo sapiens	NRP1;ITGA10		R-HSA-445088;R-HSA-445083	https://reactome.org/PathwayBrowser/#/R-HSA-447041
R-HSA-5578749	Transcriptional regulation by small RNAs	7	81	0.00550234	0.0786403	0.804684	1	5	0.000377958	9606	Homo sapiens	HIST1H2BO;HIST1H4B;HIST4H4;HIST1H4H;HIST1H2BG;HIST1H3B;HIST1H4C;HIST1H2BD;HIST1H4E		R-HSA-5578742	https://reactome.org/PathwayBrowser/#/R-HSA-5578749
R-HSA-69473	G2/M DNA damage checkpoint	7	81	0.00550234	0.0786403	0.804684	2	12	0.000907098	9606	Homo sapiens	HIST1H2BO;HIST1H4B;HERC2;HIST4H4;HIST1H4H;HIST1H2BG;HIST1H4C;HIST1H2BD;HIST1H4E		R-HSA-5683735;R-HSA-69891	https://reactome.org/PathwayBrowser/#/R-HSA-69473
R-HSA-9632697	Evasion of Oxidative Stress Induced Senescence Due to Defective p16INK4A binding to CDK4	1	2	0.00013586	0.0866398	0.804684	1	1	7.55915e-05	9606	Homo sapiens	CDKN2A		R-HSA-9630792	https://reactome.org/PathwayBrowser/#/R-HSA-9632697
R-HSA-9630791	Evasion of Oncogene Induced Senescence Due to Defective p16INK4A binding to CDK4	1	2	0.00013586	0.0866398	0.804684	1	1	7.55915e-05	9606	Homo sapiens	CDKN2A		R-HSA-9630792	https://reactome.org/PathwayBrowser/#/R-HSA-9630791
R-HSA-9645722	Defective Intrinsic Pathway for Apoptosis Due to p14ARF Loss of Function	1	2	0.00013586	0.0866398	0.804684	1	1	7.55915e-05	9606	Homo sapiens	CDKN2A		R-HSA-9645766	https://reactome.org/PathwayBrowser/#/R-HSA-9645722
R-HSA-1181150	Signaling by NODAL	3	23	0.00156239	0.0880656	0.804684	6	12	0.000907098	9606	Homo sapiens	CCDC88C;GDF1;FOXO3B		R-HSA-1181155;R-HSA-1225894;R-HSA-1181156;R-HSA-1535903;R-HSA-1181355;R-HSA-1225919	https://reactome.org/PathwayBrowser/#/R-HSA-1181150
R-HSA-419812	Calcitonin-like ligand receptors	2	11	0.000747232	0.0896635	0.804684	3	4	0.000302366	9606	Homo sapiens	RAMP2;RAMP1		R-HSA-420214;R-HSA-420127;R-HSA-420265	https://reactome.org/PathwayBrowser/#/R-HSA-419812
R-HSA-3214858	RMTs methylate histone arginines	5	53	0.0036003	0.095682	0.804684	15	22	0.00166301	9606	Homo sapiens	HIST1H4B;HIST4H4;HIST2H2AB;HIST1H4H;HIST1H2AG;HIST1H3B;HIST1H4C;HIST1H4E		R-HSA-5205867;R-HSA-5218952;R-HSA-5212679;R-HSA-5205799;R-HSA-5205798;R-HSA-5205861;R-HSA-5661117;R-HSA-5225602;R-HSA-5205824;R-HSA-5661126;R-HSA-5205822;R-HSA-5205820;R-HSA-5229203;R-HSA-5229010;R-HSA-5225649	https://reactome.org/PathwayBrowser/#/R-HSA-3214858
R-HSA-375165	NCAM signaling for neurite out-growth	6	70	0.00475511	0.101715	0.804684	9	23	0.0017386	9606	Homo sapiens	SPTBN5;CACNB3;COL5A1;COL9A2;SPTBN2		R-HSA-392053;R-HSA-525833;R-HSA-392054;R-HSA-392051;R-HSA-391868;R-HSA-375151;R-HSA-391871;R-HSA-391865;R-HSA-391866	https://reactome.org/PathwayBrowser/#/R-HSA-375165
R-HSA-73854	RNA Polymerase I Promoter Clearance	7	87	0.00590992	0.104093	0.804684	2	10	0.000755915	9606	Homo sapiens	HIST1H2BO;HIST1H4B;HIST4H4;HIST1H4H;HIST1H2BG;HIST1H3B;HIST1H4C;HIST1H2BD;HIST1H4E		R-HSA-73718;R-HSA-74986	https://reactome.org/PathwayBrowser/#/R-HSA-73854
R-HSA-1474290	Collagen formation	8	104	0.00706474	0.104339	0.804684	34	77	0.00582055	9606	Homo sapiens	FMNL1;COL5A1;COL7A1;KLHL11;COL9A2;PLEC		R-HSA-8948232;R-HSA-2002460;R-HSA-8948234;R-HSA-8948224;R-HSA-8948226;R-HSA-1474266;R-HSA-8948228;R-HSA-8948230;R-HSA-8948231;R-HSA-2214324;R-HSA-1981128;R-HSA-2002440;R-HSA-8944223;R-HSA-1980233;R-HSA-2214330;R-HSA-1981120;R-HSA-1650808;R-HSA-2002428;R-HSA-2022073;R-HSA-2213192;R-HSA-2213195;R-HSA-2089971;R-HSA-8944229;R-HSA-1981104;R-HSA-2396234;R-HSA-2213201;R-HSA-8944250;R-HSA-8948219;R-HSA-2…	https://reactome.org/PathwayBrowser/#/R-HSA-1474290
R-HSA-977225	Amyloid fiber formation	7	88	0.00597785	0.108722	0.804684	1	33	0.00249452	9606	Homo sapiens	HIST1H2BO;HIST1H4B;HIST4H4;HIST1H4H;HIST1H2BG;HIST1H3B;HIST1H4C;HIST1H2BD;HIST1H4E		R-HSA-977224	https://reactome.org/PathwayBrowser/#/R-HSA-977225
R-HSA-1474165	Reproduction	9	123	0.00835541	0.111053	0.804684	10	24	0.0018142	9606	Homo sapiens	HIST1H2BO;HIST1H4B;HIST4H4;CATSPERG;HIST1H4H;HIST1H2BG;HIST1H3B;HIST1H4C;HIST1H2BD;SYNE2;HIST1H4E		R-HSA-2534359;R-HSA-2534388;R-HSA-912408;R-HSA-912458;R-HSA-912503;R-HSA-912470;R-HSA-912496;R-HSA-912467;R-HSA-1214188;R-HSA-912450	https://reactome.org/PathwayBrowser/#/R-HSA-1474165
R-HSA-5250941	Negative epigenetic regulation of rRNA expression	7	89	0.00604578	0.11346	0.804684	6	12	0.000907098	9606	Homo sapiens	HIST1H2BO;HIST1H4B;HIST4H4;HIST1H4H;HIST1H2BG;HIST1H3B;HIST1H4C;HIST1H2BD;HIST1H4E		R-HSA-427527;R-HSA-427514;R-HSA-5227490;R-HSA-433672;R-HSA-427528;R-HSA-427337	https://reactome.org/PathwayBrowser/#/R-HSA-5250941
R-HSA-73864	RNA Polymerase I Transcription	7	89	0.00604578	0.11346	0.804684	2	14	0.00105828	9606	Homo sapiens	HIST1H2BO;HIST1H4B;HIST4H4;HIST1H4H;HIST1H2BG;HIST1H3B;HIST1H4C;HIST1H2BD;HIST1H4E		R-HSA-73718;R-HSA-74986	https://reactome.org/PathwayBrowser/#/R-HSA-73864
R-HSA-5173214	O-glycosylation of TSR domain-containing proteins	4	41	0.00278514	0.117887	0.804684	2	2	0.000151183	9606	Homo sapiens	FMNL1;MYH9;ADAMTS9;ADAMTS7		R-HSA-5173005;R-HSA-5173192	https://reactome.org/PathwayBrowser/#/R-HSA-5173214
R-HSA-190861	Gap junction assembly	4	41	0.00278514	0.117887	0.804684	4	16	0.00120946	9606	Homo sapiens	GJC1;TUBA1A;GJC2		R-HSA-190682;R-HSA-190520;R-HSA-191737;R-HSA-190877	https://reactome.org/PathwayBrowser/#/R-HSA-190861
R-HSA-187037	Signaling by NTRK1 (TRKA)	10	143	0.00971401	0.119794	0.804684	29	102	0.00771033	9606	Homo sapiens	EGR1;MAPK11;DYRK3;EGR3;EGR4;VGF;PLEKHG5		R-HSA-9613202;R-HSA-171011;R-HSA-9031624;R-HSA-9613207;R-HSA-9613210;R-HSA-9031616;R-HSA-198669;R-HSA-9612483;R-HSA-9621386;R-HSA-9621385;R-HSA-9612493;R-HSA-9621042;R-HSA-9620723;R-HSA-9620663;R-HSA-187688;R-HSA-9621048;R-HSA-9621054;R-HSA-199917;R-HSA-9612514;R-HSA-9613219;R-HSA-9612516;R-HSA-9621035;R-HSA-9621032;R-HSA-9612073;R-HSA-9616105;R-HSA-9616110;R-HSA-9616367;R-HSA-9612076;R-HSA-96207…	https://reactome.org/PathwayBrowser/#/R-HSA-187037
R-HSA-9630750	Evasion of Oncogene Induced Senescence Due to p16INK4A Defects	1	3	0.000203791	0.127107	0.804684	2	2	0.000151183	9606	Homo sapiens	CDKN2A		R-HSA-9630795;R-HSA-9630792	https://reactome.org/PathwayBrowser/#/R-HSA-9630750
R-HSA-9632693	Evasion of Oxidative Stress Induced Senescence Due to p16INK4A Defects	1	3	0.000203791	0.127107	0.804684	2	2	0.000151183	9606	Homo sapiens	CDKN2A		R-HSA-9630795;R-HSA-9630792	https://reactome.org/PathwayBrowser/#/R-HSA-9632693
R-HSA-9630794	Evasion of Oncogene Induced Senescence Due to Defective p16INK4A binding to CDK4 and CDK6	1	3	0.000203791	0.127107	0.804684	1	1	7.55915e-05	9606	Homo sapiens	CDKN2A		R-HSA-9630795	https://reactome.org/PathwayBrowser/#/R-HSA-9630794
R-HSA-1299316	TWIK-releated acid-sensitive K+ channel (TASK)	1	3	0.000203791	0.127107	0.804684	1	1	7.55915e-05	9606	Homo sapiens	KCNK3		R-HSA-1299318	https://reactome.org/PathwayBrowser/#/R-HSA-1299316
R-HSA-9632700	Evasion of Oxidative Stress Induced Senescence Due to Defective p16INK4A binding to CDK4 and CDK6	1	3	0.000203791	0.127107	0.804684	1	1	7.55915e-05	9606	Homo sapiens	CDKN2A		R-HSA-9630795	https://reactome.org/PathwayBrowser/#/R-HSA-9632700
R-HSA-210747	Regulation of gene expression in early pancreatic precursor cells	2	14	0.000951022	0.133272	0.804684	3	6	0.000453549	9606	Homo sapiens	ONECUT1		R-HSA-210769;R-HSA-210784;R-HSA-210767	https://reactome.org/PathwayBrowser/#/R-HSA-210747
R-HSA-3238698	WNT ligand biogenesis and trafficking	3	28	0.00190204	0.135575	0.804684	8	12	0.000907098	9606	Homo sapiens	WNT10B;WNT7B;WNT9A		R-HSA-3247840;R-HSA-3238691;R-HSA-3247843;R-HSA-3247844;R-HSA-3238694;R-HSA-3781941;R-HSA-3247837;R-HSA-3781943	https://reactome.org/PathwayBrowser/#/R-HSA-3238698
R-HSA-419037	NCAM1 interactions	4	44	0.00298893	0.141455	0.804684	2	10	0.000755915	9606	Homo sapiens	CACNB3;COL5A1;COL9A2		R-HSA-525833;R-HSA-375151	https://reactome.org/PathwayBrowser/#/R-HSA-419037
R-HSA-3000170	Syndecan interactions	3	29	0.00196997	0.14596	0.804684	3	15	0.00113387	9606	Homo sapiens	COL5A1;SDC3;COL9A2		R-HSA-2684507;R-HSA-2681694;R-HSA-2731075	https://reactome.org/PathwayBrowser/#/R-HSA-3000170
R-HSA-8866654	E3 ubiquitin ligases ubiquitinate target proteins	5	61	0.00414374	0.146348	0.804684	2	16	0.00120946	9606	Homo sapiens	HIST1H2BO;HIST1H2BG;HIST1H2BD		R-HSA-8942099;R-HSA-8942101	https://reactome.org/PathwayBrowser/#/R-HSA-8866654
R-HSA-376172	DSCAM interactions	2	15	0.00101895	0.148704	0.804684	1	6	0.000453549	9606	Homo sapiens	MAPK11;PLEKHG5		R-HSA-451366	https://reactome.org/PathwayBrowser/#/R-HSA-376172
R-HSA-5617472	Activation of anterior HOX genes in hindbrain development during early embryogenesis	8	116	0.0078799	0.160636	0.804684	31	43	0.00325043	9606	Homo sapiens	KMT2D;HIST1H2BO;HIST1H4B;HIST4H4;HIST1H4H;HIST1H2BG;HIST1H3B;HIST1H4C;HIST1H2BD;HIST1H4E		R-HSA-5617877;R-HSA-5617492;R-HSA-5617431;R-HSA-5621010;R-HSA-5617874;R-HSA-6810159;R-HSA-6810158;R-HSA-5617887;R-HSA-5617862;R-HSA-6810161;R-HSA-5617859;R-HSA-5617484;R-HSA-5617676;R-HSA-5693644;R-HSA-5617486;R-HSA-5617672;R-HSA-5617483;R-HSA-5617867;R-HSA-5621002;R-HSA-5617866;R-HSA-5617462;R-HSA-5617650;R-HSA-5617661;R-HSA-5617471;R-HSA-5617445;R-HSA-5617452;R-HSA-5617454;R-HSA-6810139;R-HSA-5…	https://reactome.org/PathwayBrowser/#/R-HSA-5617472
R-HSA-5619507	Activation of HOX genes during differentiation	8	116	0.0078799	0.160636	0.804684	31	43	0.00325043	9606	Homo sapiens	KMT2D;HIST1H2BO;HIST1H4B;HIST4H4;HIST1H4H;HIST1H2BG;HIST1H3B;HIST1H4C;HIST1H2BD;HIST1H4E		R-HSA-5617877;R-HSA-5617492;R-HSA-5617431;R-HSA-5621010;R-HSA-5617874;R-HSA-6810159;R-HSA-6810158;R-HSA-5617887;R-HSA-5617862;R-HSA-6810161;R-HSA-5617859;R-HSA-5617484;R-HSA-5617676;R-HSA-5693644;R-HSA-5617486;R-HSA-5617672;R-HSA-5617483;R-HSA-5617867;R-HSA-5621002;R-HSA-5617866;R-HSA-5617462;R-HSA-5617650;R-HSA-5617661;R-HSA-5617471;R-HSA-5617445;R-HSA-5617452;R-HSA-5617454;R-HSA-6810139;R-HSA-5…	https://reactome.org/PathwayBrowser/#/R-HSA-5619507
R-HSA-8951936	RUNX3 regulates p14-ARF	2	16	0.00108688	0.16447	0.804684	2	8	0.000604732	9606	Homo sapiens	CDKN2A		R-HSA-8952081;R-HSA-8952101	https://reactome.org/PathwayBrowser/#/R-HSA-8951936
R-HSA-194306	Neurophilin interactions with VEGF and VEGFR	1	4	0.000271721	0.165783	0.804684	1	2	0.000151183	9606	Homo sapiens	NRP1		R-HSA-195408	https://reactome.org/PathwayBrowser/#/R-HSA-194306
R-HSA-211000	Gene Silencing by RNA	8	117	0.00794783	0.165873	0.804684	3	36	0.00272129	9606	Homo sapiens	HIST1H2BO;HIST1H4B;HIST4H4;HIST1H4H;HIST1H2BG;HIST1H3B;HIST1H4C;HIST1H2BD;HIST1H4E;TNRC6B		R-HSA-5578742;R-HSA-426522;R-HSA-426489	https://reactome.org/PathwayBrowser/#/R-HSA-211000
R-HSA-1482801	Acyl chain remodelling of PS	3	31	0.00210584	0.167461	0.804684	4	8	0.000604732	9606	Homo sapiens	PLA2G4B;NES		R-HSA-1482691;R-HSA-1482771;R-HSA-1482897;R-HSA-1482636	https://reactome.org/PathwayBrowser/#/R-HSA-1482801
R-HSA-8874081	MET activates PTK2 signaling	3	32	0.00217377	0.178539	0.804684	1	5	0.000377958	9606	Homo sapiens	COL5A1;ITGA3;COL9A2		R-HSA-8874079	https://reactome.org/PathwayBrowser/#/R-HSA-8874081
R-HSA-6788467	IL-6-type cytokine receptor ligand interactions	2	17	0.00115481	0.180512	0.804684	4	14	0.00105828	9606	Homo sapiens	IL11;CTF1		R-HSA-449829;R-HSA-6783524;R-HSA-5696482;R-HSA-449976	https://reactome.org/PathwayBrowser/#/R-HSA-6788467
R-HSA-3214841	PKMTs methylate histone lysines	4	49	0.00332858	0.184369	0.804684	20	22	0.00166301	9606	Homo sapiens	KMT2D;HIST1H4B;HIST4H4;SETD7;HIST1H4H;HIST1H3B;HIST1H4C;HIST1H4E		R-HSA-5637686;R-HSA-5159245;R-HSA-5244692;R-HSA-5634802;R-HSA-5638332;R-HSA-5634750;R-HSA-5638333;R-HSA-5638141;R-HSA-5423038;R-HSA-5651654;R-HSA-5649799;R-HSA-5649764;R-HSA-5638157;R-HSA-5634729;R-HSA-5649802;R-HSA-5649800;R-HSA-4827383;R-HSA-5651657;R-HSA-4827382;R-HSA-5649801	https://reactome.org/PathwayBrowser/#/R-HSA-3214841
R-HSA-445095	Interaction between L1 and Ankyrins	3	33	0.0022417	0.18981	0.804684	4	4	0.000302366	9606	Homo sapiens	SPTBN5;L1CAM;SPTBN2		R-HSA-445076;R-HSA-374675;R-HSA-392751;R-HSA-373739	https://reactome.org/PathwayBrowser/#/R-HSA-445095
R-HSA-2022090	Assembly of collagen fibrils and other multimeric structures	5	67	0.00455132	0.190401	0.804684	8	26	0.00196538	9606	Homo sapiens	COL5A1;COL7A1;COL9A2;PLEC		R-HSA-2213201;R-HSA-2214324;R-HSA-2213192;R-HSA-2213195;R-HSA-2213210;R-HSA-2214330;R-HSA-1474266;R-HSA-2396234	https://reactome.org/PathwayBrowser/#/R-HSA-2022090
R-HSA-1483115	Hydrolysis of LPC	2	18	0.00122274	0.196774	0.804684	2	6	0.000453549	9606	Homo sapiens	PLA2G4B		R-HSA-1482612;R-HSA-1482685	https://reactome.org/PathwayBrowser/#/R-HSA-1483115
R-HSA-69236	G1 Phase	4	51	0.00346444	0.202604	0.804684	10	15	0.00113387	9606	Homo sapiens	CDKN2B;CCND2;CDKN2A		R-HSA-182594;R-HSA-8941915;R-HSA-8942607;R-HSA-9018017;R-HSA-69227;R-HSA-8942803;R-HSA-1226094;R-HSA-8942836;R-HSA-1226095;R-HSA-8941895	https://reactome.org/PathwayBrowser/#/R-HSA-69236
R-HSA-69231	Cyclin D associated events in G1	4	51	0.00346444	0.202604	0.804684	10	15	0.00113387	9606	Homo sapiens	CDKN2B;CCND2;CDKN2A		R-HSA-182594;R-HSA-8941915;R-HSA-8942607;R-HSA-9018017;R-HSA-69227;R-HSA-8942803;R-HSA-1226094;R-HSA-8942836;R-HSA-1226095;R-HSA-8941895	https://reactome.org/PathwayBrowser/#/R-HSA-69231
R-HSA-2206296	MPS II - Hunter syndrome	1	5	0.000339651	0.202749	0.804684	2	2	0.000151183	9606	Homo sapiens	IDS		R-HSA-2262743;R-HSA-9036046	https://reactome.org/PathwayBrowser/#/R-HSA-2206296
R-HSA-5683678	Defective ABCA3 causes SMDP3	1	5	0.000339651	0.202749	0.804684	1	1	7.55915e-05	9606	Homo sapiens	ABCA3		R-HSA-5683672	https://reactome.org/PathwayBrowser/#/R-HSA-5683678
R-HSA-5688399	Defective ABCA3 causes SMDP3	1	5	0.000339651	0.202749	0.804684	1	1	7.55915e-05	9606	Homo sapiens	ABCA3		R-HSA-5688397	https://reactome.org/PathwayBrowser/#/R-HSA-5688399
R-HSA-5579015	Defective CYP26B1 causes Radiohumeral fusions with other skeletal and craniofacial anomalies (RHFCA)	1	5	0.000339651	0.202749	0.804684	1	1	7.55915e-05	9606	Homo sapiens	CYP26B1		R-HSA-5602063	https://reactome.org/PathwayBrowser/#/R-HSA-5579015
R-HSA-5368598	Negative regulation of TCF-dependent signaling by DVL-interacting proteins	1	5	0.000339651	0.202749	0.804684	1	2	0.000151183	9606	Homo sapiens	CCDC88C		R-HSA-5368588	https://reactome.org/PathwayBrowser/#/R-HSA-5368598
R-HSA-216083	Integrin cell surface interactions	6	87	0.00590992	0.205375	0.804684	13	55	0.00415753	9606	Homo sapiens	COL5A1;ITGA3;COL7A1;ITGA10;COL9A2		R-HSA-114563;R-HSA-4085083;R-HSA-4539779;R-HSA-216043;R-HSA-2467436;R-HSA-216040;R-HSA-2327695;R-HSA-204434;R-HSA-265429;R-HSA-4086223;R-HSA-4088264;R-HSA-4086216;R-HSA-4084903	https://reactome.org/PathwayBrowser/#/R-HSA-216083
R-HSA-1442490	Collagen degradation	5	69	0.00468718	0.206036	0.804684	10	34	0.00257011	9606	Homo sapiens	COL5A1;COL7A1;COL9A2		R-HSA-2485111;R-HSA-1564164;R-HSA-1474213;R-HSA-1454757;R-HSA-1474210;R-HSA-2473584;R-HSA-2471842;R-HSA-2537499;R-HSA-1564184;R-HSA-1564120	https://reactome.org/PathwayBrowser/#/R-HSA-1442490
R-HSA-8939236	RUNX1 regulates transcription of genes involved in differentiation of HSCs	7	106	0.0072006	0.20898	0.804684	3	15	0.00113387	9606	Homo sapiens	HIST1H2BO;HIST1H4B;HIST4H4;HIST1H4H;HIST1H2BG;HIST1H3B;HIST1H4C;HIST1H2BD;HIST1H4E		R-HSA-8865491;R-HSA-8865505;R-HSA-8865498	https://reactome.org/PathwayBrowser/#/R-HSA-8939236
R-HSA-190828	Gap junction trafficking	4	52	0.00353237	0.211915	0.804684	4	20	0.00151183	9606	Homo sapiens	GJC1;TUBA1A;GJC2		R-HSA-190682;R-HSA-190520;R-HSA-191737;R-HSA-190877	https://reactome.org/PathwayBrowser/#/R-HSA-190828
R-HSA-171007	p38MAPK events	2	19	0.00129067	0.213206	0.804684	2	5	0.000377958	9606	Homo sapiens	MAPK11;PLEKHG5		R-HSA-171011;R-HSA-187688	https://reactome.org/PathwayBrowser/#/R-HSA-171007
R-HSA-166520	Signaling by NTRKs	10	166	0.0112764	0.225075	0.804684	29	164	0.012397	9606	Homo sapiens	EGR1;MAPK11;DYRK3;EGR3;EGR4;VGF;PLEKHG5		R-HSA-9613202;R-HSA-171011;R-HSA-9031624;R-HSA-9613207;R-HSA-9613210;R-HSA-9031616;R-HSA-198669;R-HSA-9612483;R-HSA-9621386;R-HSA-9621385;R-HSA-9612493;R-HSA-9621042;R-HSA-9620723;R-HSA-9620663;R-HSA-187688;R-HSA-9621048;R-HSA-9621054;R-HSA-199917;R-HSA-9612514;R-HSA-9613219;R-HSA-9612516;R-HSA-9621035;R-HSA-9621032;R-HSA-9612073;R-HSA-9616105;R-HSA-9616110;R-HSA-9616367;R-HSA-9612076;R-HSA-96207…	https://reactome.org/PathwayBrowser/#/R-HSA-166520
R-HSA-210744	Regulation of gene expression in late stage (branching morphogenesis) pancreatic bud precursor cells	2	20	0.0013586	0.229759	0.804684	4	4	0.000302366	9606	Homo sapiens	ONECUT1;MAML3		R-HSA-1980047;R-HSA-210837;R-HSA-210836;R-HSA-210824	https://reactome.org/PathwayBrowser/#/R-HSA-210744
R-HSA-3232118	SUMOylation of transcription factors	2	20	0.0013586	0.229759	0.804684	2	11	0.000831507	9606	Homo sapiens	CDKN2A;HIC1		R-HSA-2997706;R-HSA-4090281	https://reactome.org/PathwayBrowser/#/R-HSA-3232118
R-HSA-5693532	DNA Double-Strand Break Repair	10	168	0.0114123	0.235613	0.804684	49	111	0.00839066	9606	Homo sapiens	HIST1H2BO;HIST1H4B;HERC2;EME2;HIST4H4;HIST1H4H;HIST1H2BG;CLSPN;HIST1H4C;HIST1H2BD;HIST1H4E;PLEC		R-HSA-5684052;R-HSA-69891;R-HSA-5686483;R-HSA-5683930;R-HSA-5683801;R-HSA-5682629;R-HSA-5686469;R-HSA-5685838;R-HSA-5683405;R-HSA-5686475;R-HSA-5686900;R-HSA-5693566;R-HSA-5683967;R-HSA-5683964;R-HSA-5684071;R-HSA-5693539;R-HSA-5693536;R-HSA-5683425;R-HSA-5693551;R-HSA-5693549;R-HSA-5683735;R-HSA-5682967;R-HSA-5684887;R-HSA-5682965;R-HSA-5693589;R-HSA-5683986;R-HSA-5684882;R-HSA-5693584;R-HSA-568…	https://reactome.org/PathwayBrowser/#/R-HSA-5693532
R-HSA-8952158	RUNX3 regulates BCL2L11 (BIM) transcription	1	6	0.000407581	0.238079	0.804684	2	2	0.000151183	9606	Homo sapiens	FOXO3B		R-HSA-8952232;R-HSA-8952226	https://reactome.org/PathwayBrowser/#/R-HSA-8952158
R-HSA-112303	Electric Transmission Across Gap Junctions	1	6	0.000407581	0.238079	0.804684	1	4	0.000302366	9606	Homo sapiens	GJC1		R-HSA-375330	https://reactome.org/PathwayBrowser/#/R-HSA-112303
R-HSA-112307	Transmission across Electrical Synapses	1	6	0.000407581	0.238079	0.804684	1	4	0.000302366	9606	Homo sapiens	GJC1		R-HSA-375330	https://reactome.org/PathwayBrowser/#/R-HSA-112307
R-HSA-157579	Telomere Maintenance	7	111	0.00754025	0.241578	0.804684	10	34	0.00257011	9606	Homo sapiens	HIST1H2BO;HIST1H4B;HIST4H4;HIST1H4H;HIST1H2BG;L1CAM;HIST1H4C;HIST1H2BD;HIST1H4E		R-HSA-9670114;R-HSA-174439;R-HSA-9668902;R-HSA-9670149;R-HSA-9670101;R-HSA-174452;R-HSA-181450;R-HSA-9668904;R-HSA-174447;R-HSA-176700	https://reactome.org/PathwayBrowser/#/R-HSA-157579
R-HSA-2129379	Molecules associated with elastic fibres	3	38	0.00258135	0.248436	0.804684	6	10	0.000755915	9606	Homo sapiens	MFAP2;LTBP1;FBLN2		R-HSA-2161282;R-HSA-2328033;R-HSA-2328048;R-HSA-2395328;R-HSA-2537665;R-HSA-1592387	https://reactome.org/PathwayBrowser/#/R-HSA-2129379
R-HSA-157858	Gap junction trafficking and regulation	4	56	0.00380409	0.250242	0.804684	4	24	0.0018142	9606	Homo sapiens	GJC1;TUBA1A;GJC2		R-HSA-190682;R-HSA-190520;R-HSA-191737;R-HSA-190877	https://reactome.org/PathwayBrowser/#/R-HSA-157858
R-HSA-68875	Mitotic Prophase	8	135	0.00917057	0.271675	0.804684	9	34	0.00257011	9606	Homo sapiens	HIST1H2BO;HIST1H4B;NUMA1;HIST4H4;HIST1H4H;HIST1H2BG;HIST1H3B;HIST1H4C;HIST1H2BD;HIST1H4E		R-HSA-2245218;R-HSA-2288097;R-HSA-380278;R-HSA-2301205;R-HSA-2294580;R-HSA-2172678;R-HSA-2294600;R-HSA-2294574;R-HSA-2294590	https://reactome.org/PathwayBrowser/#/R-HSA-68875
R-HSA-426496	Post-transcriptional silencing by small RNAs	1	7	0.000475511	0.271845	0.804684	2	3	0.000226775	9606	Homo sapiens	TNRC6B		R-HSA-426522;R-HSA-426489	https://reactome.org/PathwayBrowser/#/R-HSA-426496
R-HSA-74713	IRS activation	1	7	0.000475511	0.271845	0.804684	1	3	0.000226775	9606	Homo sapiens	GRB10		R-HSA-74707	https://reactome.org/PathwayBrowser/#/R-HSA-74713
R-HSA-1482788	Acyl chain remodelling of PC	3	40	0.00271721	0.272627	0.804684	4	9	0.000680324	9606	Homo sapiens	PLA2G4B;NES		R-HSA-1482533;R-HSA-1482547;R-HSA-1482862;R-HSA-1482856	https://reactome.org/PathwayBrowser/#/R-HSA-1482788
R-HSA-201681	TCF dependent signaling in response to WNT	12	216	0.0146729	0.278255	0.804684	10	71	0.005367	9606	Homo sapiens	KMT2D;HIST1H2BO;WNT9A;SOX2;AKAP12;HIST1H4B;HIST4H4;CCDC88C;HIST1H4H;HIST1H2BG;HIST1H3B;HIST1H4C;HIST1H2BD;HIST1H4E		R-HSA-3769370;R-HSA-3364026;R-HSA-3364042;R-HSA-3772434;R-HSA-1458875;R-HSA-3772436;R-HSA-3364014;R-HSA-5368588;R-HSA-3451147;R-HSA-5626938	https://reactome.org/PathwayBrowser/#/R-HSA-201681
R-HSA-73884	Base Excision Repair	6	99	0.00672509	0.29432	0.804684	6	105	0.00793711	9606	Homo sapiens	HIST1H2BO;HIST1H4B;HIST4H4;HIST1H4H;HIST1H2BG;HIST1H4C;HIST1H2BD;HIST1H4E		R-HSA-9629216;R-HSA-9629483;R-HSA-9629195;R-HSA-9629497;R-HSA-9629372;R-HSA-9629373	https://reactome.org/PathwayBrowser/#/R-HSA-73884
R-HSA-3247509	Chromatin modifying enzymes	14	260	0.0176618	0.294382	0.804684	71	85	0.00642528	9606	Homo sapiens	KMT2D;HIST1H2BO;SETD7;HIST2H2AB;HIST2H2BF;HIST1H4B;HIST4H4;HIST1H4H;HIST1H2AG;HIST1H2BG;HIST1H3B;HIST1H4C;HIST1H2BD;HIST1H4E		R-HSA-5159245;R-HSA-5205824;R-HSA-5661126;R-HSA-5144542;R-HSA-5651654;R-HSA-5661124;R-HSA-5661125;R-HSA-5661122;R-HSA-5661123;R-HSA-5661120;R-HSA-5661121;R-HSA-5229010;R-HSA-4722133;R-HSA-5651657;R-HSA-5205867;R-HSA-5634802;R-HSA-3321883;R-HSA-5205861;R-HSA-5638141;R-HSA-5649764;R-HSA-3697920;R-HSA-3318415;R-HSA-4827383;R-HSA-4827382;R-HSA-3318413;R-HSA-4754187;R-HSA-5244692;R-HSA-3321975;R-HSA-3…	https://reactome.org/PathwayBrowser/#/R-HSA-3247509
R-HSA-4839726	Chromatin organization	14	260	0.0176618	0.294382	0.804684	71	85	0.00642528	9606	Homo sapiens	KMT2D;HIST1H2BO;SETD7;HIST2H2AB;HIST2H2BF;HIST1H4B;HIST4H4;HIST1H4H;HIST1H2AG;HIST1H2BG;HIST1H3B;HIST1H4C;HIST1H2BD;HIST1H4E		R-HSA-5159245;R-HSA-5205824;R-HSA-5661126;R-HSA-5144542;R-HSA-5651654;R-HSA-5661124;R-HSA-5661125;R-HSA-5661122;R-HSA-5661123;R-HSA-5661120;R-HSA-5661121;R-HSA-5229010;R-HSA-4722133;R-HSA-5651657;R-HSA-5205867;R-HSA-5634802;R-HSA-3321883;R-HSA-5205861;R-HSA-5638141;R-HSA-5649764;R-HSA-3697920;R-HSA-3318415;R-HSA-4827383;R-HSA-4827382;R-HSA-3318413;R-HSA-4754187;R-HSA-5244692;R-HSA-3321975;R-HSA-3…	https://reactome.org/PathwayBrowser/#/R-HSA-4839726
R-HSA-1482839	Acyl chain remodelling of PE	3	42	0.00285307	0.297051	0.804684	4	9	0.000680324	9606	Homo sapiens	PLA2G4B;NES		R-HSA-1482646;R-HSA-1482884;R-HSA-1482828;R-HSA-1482667	https://reactome.org/PathwayBrowser/#/R-HSA-1482839
R-HSA-1368108	BMAL1:CLOCK,NPAS2 activates circadian gene expression	3	42	0.00285307	0.297051	0.804684	3	20	0.00151183	9606	Homo sapiens	HELZ2;BHLHE41		R-HSA-879724;R-HSA-879770;R-HSA-5663105	https://reactome.org/PathwayBrowser/#/R-HSA-1368108
R-HSA-445144	Signal transduction by L1	2	25	0.00169825	0.312979	0.804684	6	11	0.000831507	9606	Homo sapiens	NRP1;L1CAM		R-HSA-392752;R-HSA-374669;R-HSA-437230;R-HSA-374686;R-HSA-445069;R-HSA-374681	https://reactome.org/PathwayBrowser/#/R-HSA-445144
R-HSA-6811436	COPI-independent Golgi-to-ER retrograde traffic	4	63	0.0042796	0.320138	0.804684	3	7	0.000529141	9606	Homo sapiens	TUBA1A;BICD1;RAB6B;BICD2		R-HSA-8849350;R-HSA-8849348;R-HSA-8849353	https://reactome.org/PathwayBrowser/#/R-HSA-6811436
R-HSA-1482925	Acyl chain remodelling of PG	2	26	0.00176618	0.32948	0.804684	4	10	0.000755915	9606	Homo sapiens	PLA2G4B		R-HSA-1482900;R-HSA-1482847;R-HSA-1482920;R-HSA-1482745	https://reactome.org/PathwayBrowser/#/R-HSA-1482925
R-HSA-210991	Basigin interactions	2	26	0.00176618	0.32948	0.804684	2	10	0.000755915	9606	Homo sapiens	ITGA3;L1CAM		R-HSA-204434;R-HSA-375133	https://reactome.org/PathwayBrowser/#/R-HSA-210991
R-HSA-167044	Signalling to RAS	2	26	0.00176618	0.32948	0.804684	2	10	0.000755915	9606	Homo sapiens	MAPK11;PLEKHG5		R-HSA-171011;R-HSA-187688	https://reactome.org/PathwayBrowser/#/R-HSA-167044
R-HSA-8852135	Protein ubiquitination	5	84	0.00570613	0.333212	0.804684	2	32	0.00241893	9606	Homo sapiens	HIST1H2BO;HIST1H2BG;HIST1H2BD		R-HSA-8942099;R-HSA-8942101	https://reactome.org/PathwayBrowser/#/R-HSA-8852135
R-HSA-8875878	MET promotes cell motility	3	45	0.00305686	0.333874	0.804684	1	12	0.000907098	9606	Homo sapiens	COL5A1;ITGA3;COL9A2		R-HSA-8874079	https://reactome.org/PathwayBrowser/#/R-HSA-8875878
R-HSA-3595174	Defective CHST14 causes EDS, musculocontractural type	1	9	0.000611372	0.334961	0.804684	1	1	7.55915e-05	9606	Homo sapiens	CHST14		R-HSA-3636919	https://reactome.org/PathwayBrowser/#/R-HSA-3595174
R-HSA-6802953	RAS signaling downstream of NF1 loss-of-function variants	1	9	0.000611372	0.334961	0.804684	1	1	7.55915e-05	9606	Homo sapiens	SPRED3		R-HSA-6802837	https://reactome.org/PathwayBrowser/#/R-HSA-6802953
R-HSA-199920	CREB phosphorylation	1	9	0.000611372	0.334961	0.804684	1	4	0.000302366	9606	Homo sapiens	DYRK3		R-HSA-199917	https://reactome.org/PathwayBrowser/#/R-HSA-199920
R-HSA-195721	Signaling by WNT	17	332	0.0225528	0.338924	0.804684	25	157	0.0118679	9606	Homo sapiens	KMT2D;WNT10B;HIST1H2BO;WNT7B;ITPR3;WNT9A;SOX2;AKAP12;GNAO1;HIST1H4B;HIST4H4;CCDC88C;HIST1H4H;HIST1H2BG;HIST1H3B;HIST1H4C;HIST1H2BD;HIST1H4E;TNRC6B		R-HSA-3364026;R-HSA-3781941;R-HSA-3781943;R-HSA-3247840;R-HSA-3238691;R-HSA-3247843;R-HSA-169680;R-HSA-3247844;R-HSA-3238694;R-HSA-4420052;R-HSA-3364014;R-HSA-5368588;R-HSA-3769370;R-HSA-3772434;R-HSA-4518575;R-HSA-3247837;R-HSA-1458875;R-HSA-3772436;R-HSA-5626938;R-HSA-3965444;R-HSA-3364042;R-HSA-3965447;R-HSA-3965441;R-HSA-4518585;R-HSA-3451147	https://reactome.org/PathwayBrowser/#/R-HSA-195721
R-HSA-1566948	Elastic fibre formation	3	46	0.00312479	0.346145	0.804684	9	17	0.00128506	9606	Homo sapiens	MFAP2;LTBP1;FBLN2		R-HSA-2161282;R-HSA-2328033;R-HSA-2328048;R-HSA-2395328;R-HSA-2537665;R-HSA-2129353;R-HSA-2129385;R-HSA-1592387;R-HSA-2129375	https://reactome.org/PathwayBrowser/#/R-HSA-1566948
R-HSA-964827	Progressive trimming of alpha-1,2-linked mannose residues from Man9/8/7GlcNAc2 to produce Man5GlcNAc2	1	10	0.000679302	0.36444	0.804684	3	3	0.000226775	9606	Homo sapiens	MAN1C1		R-HSA-964830;R-HSA-964825;R-HSA-964737	https://reactome.org/PathwayBrowser/#/R-HSA-964827
R-HSA-2892245	POU5F1 (OCT4), SOX2, NANOG repress genes related to differentiation	1	10	0.000679302	0.36444	0.804684	6	7	0.000529141	9606	Homo sapiens	SOX2		R-HSA-2972965;R-HSA-2972949;R-HSA-2972948;R-HSA-2972966;R-HSA-2972977;R-HSA-2972979	https://reactome.org/PathwayBrowser/#/R-HSA-2892245
R-HSA-9648895	Response of EIF2AK1 (HRI) to heme deficiency	2	29	0.00196997	0.378229	0.804684	1	20	0.00151183	9606	Homo sapiens	GRB10		R-HSA-9654792	https://reactome.org/PathwayBrowser/#/R-HSA-9648895
R-HSA-9609690	HCMV Early Events	11	215	0.014605	0.384419	0.804684	7	12	0.000907098	9606	Homo sapiens	HIST1H2BO;HIST2H2AB;HIST2H2BF;HIST1H4B;TUBA1A;HIST4H4;HIST1H4H;HIST1H2AG;HIST1H2BG;HIST1H3B;HIST1H4C;HIST1H2BD;HIST1H4E		R-HSA-9614816;R-HSA-9621073;R-HSA-9614343;R-HSA-9614810;R-HSA-9614811;R-HSA-9623096;R-HSA-9614367	https://reactome.org/PathwayBrowser/#/R-HSA-9609690
R-HSA-446107	Type I hemidesmosome assembly	1	11	0.000747232	0.392613	0.804684	6	6	0.000453549	9606	Homo sapiens	PLEC		R-HSA-446083;R-HSA-432956;R-HSA-446077;R-HSA-432909;R-HSA-432952;R-HSA-446089	https://reactome.org/PathwayBrowser/#/R-HSA-446107
R-HSA-3785653	Myoclonic epilepsy of Lafora	1	11	0.000747232	0.392613	0.804684	1	2	0.000151183	9606	Homo sapiens	NHLRC1		R-HSA-3797226	https://reactome.org/PathwayBrowser/#/R-HSA-3785653
R-HSA-425986	Sodium/Proton exchangers	1	11	0.000747232	0.392613	0.804684	1	4	0.000302366	9606	Homo sapiens	SLC9A3;ARHGAP23		R-HSA-425994	https://reactome.org/PathwayBrowser/#/R-HSA-425986
R-HSA-9018519	Estrogen-dependent gene expression	8	154	0.0104612	0.397937	0.804684	20	66	0.00498904	9606	Homo sapiens	HIST1H2BO;HIST1H4B;HIST4H4;HIST1H4H;HIST1H2BG;HIST1H3B;HIST1H4C;HIST1H2BD;HIST1H4E;TNRC6B		R-HSA-9009065;R-HSA-9012203;R-HSA-9011981;R-HSA-9011949;R-HSA-9011983;R-HSA-9011950;R-HSA-9012000;R-HSA-9009378;R-HSA-9011941;R-HSA-9012196;R-HSA-9011975;R-HSA-9011961;R-HSA-9009371;R-HSA-9012186;R-HSA-9011966;R-HSA-9011985;R-HSA-9011952;R-HSA-9011984;R-HSA-9012208;R-HSA-9011958	https://reactome.org/PathwayBrowser/#/R-HSA-9018519
R-HSA-69481	G2/M Checkpoints	8	154	0.0104612	0.397937	0.804684	4	24	0.0018142	9606	Homo sapiens	HIST1H2BO;HIST1H4B;HERC2;HIST4H4;HIST1H4H;HIST1H2BG;CLSPN;HIST1H4C;HIST1H2BD;HIST1H4E		R-HSA-5683735;R-HSA-69891;R-HSA-176298;R-HSA-176318	https://reactome.org/PathwayBrowser/#/R-HSA-69481
R-HSA-380284	Loss of proteins required for interphase microtubule organization from the centrosome	4	71	0.00482304	0.401372	0.804684	3	3	0.000226775	9606	Homo sapiens	TUBA1A;CEP164;CEP250;PCNT		R-HSA-380294;R-HSA-380272;R-HSA-380303	https://reactome.org/PathwayBrowser/#/R-HSA-380284
R-HSA-380259	Loss of Nlp from mitotic centrosomes	4	71	0.00482304	0.401372	0.804684	2	2	0.000151183	9606	Homo sapiens	TUBA1A;CEP164;CEP250;PCNT		R-HSA-380272;R-HSA-380303	https://reactome.org/PathwayBrowser/#/R-HSA-380259
R-HSA-3214842	HDMs demethylate histones	2	31	0.00210584	0.409899	0.804684	17	17	0.00128506	9606	Homo sapiens	HIST1H4B;HIST4H4;HIST1H4H;HIST1H3B;HIST1H4C;HIST1H4E		R-HSA-4754187;R-HSA-4754176;R-HSA-5661116;R-HSA-5661114;R-HSA-5661115;R-HSA-4754181;R-HSA-3214912;R-HSA-5661124;R-HSA-5661125;R-HSA-4724284;R-HSA-5661122;R-HSA-5661123;R-HSA-5661120;R-HSA-5661121;R-HSA-4722133;R-HSA-5423117;R-HSA-4724279	https://reactome.org/PathwayBrowser/#/R-HSA-3214842
R-HSA-3000157	Laminin interactions	2	31	0.00210584	0.409899	0.804684	3	15	0.00113387	9606	Homo sapiens	ITGA3;COL7A1		R-HSA-216048;R-HSA-3787997;R-HSA-4084501	https://reactome.org/PathwayBrowser/#/R-HSA-3000157
R-HSA-6783589	Interleukin-6 family signaling	2	31	0.00210584	0.409899	0.804684	4	34	0.00257011	9606	Homo sapiens	IL11;CTF1		R-HSA-449829;R-HSA-6783524;R-HSA-5696482;R-HSA-449976	https://reactome.org/PathwayBrowser/#/R-HSA-6783589
R-HSA-201688	WNT mediated activation of DVL	1	12	0.000815162	0.41954	0.804684	2	4	0.000302366	9606	Homo sapiens	AKAP12		R-HSA-3772434;R-HSA-3772436	https://reactome.org/PathwayBrowser/#/R-HSA-201688
R-HSA-8851680	Butyrophilin (BTN) family interactions	1	12	0.000815162	0.41954	0.804684	2	8	0.000604732	9606	Homo sapiens	BTN1A1		R-HSA-8851044;R-HSA-8938431	https://reactome.org/PathwayBrowser/#/R-HSA-8851680
R-HSA-198693	AKT phosphorylates targets in the nucleus	1	12	0.000815162	0.41954	0.804684	1	4	0.000302366	9606	Homo sapiens	FOXO3B		R-HSA-199299	https://reactome.org/PathwayBrowser/#/R-HSA-198693
R-HSA-450341	Activation of the AP-1 family of transcription factors	1	12	0.000815162	0.41954	0.804684	1	5	0.000377958	9606	Homo sapiens	MAPK11		R-HSA-168053	https://reactome.org/PathwayBrowser/#/R-HSA-450341
R-HSA-264870	Caspase-mediated cleavage of cytoskeletal proteins	1	12	0.000815162	0.41954	0.804684	1	10	0.000755915	9606	Homo sapiens	PLEC		R-HSA-201637	https://reactome.org/PathwayBrowser/#/R-HSA-264870
R-HSA-8934593	Regulation of RUNX1 Expression and Activity	2	32	0.00217377	0.425436	0.804684	13	19	0.00143624	9606	Homo sapiens	CCND2;TNRC6B		R-HSA-8938440;R-HSA-8935785;R-HSA-8938507;R-HSA-8937134;R-HSA-8936068;R-HSA-8865320;R-HSA-8935864;R-HSA-8939129;R-HSA-8935930;R-HSA-8936058;R-HSA-8938867;R-HSA-8935766;R-HSA-8938487	https://reactome.org/PathwayBrowser/#/R-HSA-8934593
R-HSA-525793	Myogenesis	2	32	0.00217377	0.425436	0.804684	6	14	0.00105828	9606	Homo sapiens	MAPK11;NTN3		R-HSA-375141;R-HSA-448951;R-HSA-448948;R-HSA-448958;R-HSA-448957;R-HSA-448955	https://reactome.org/PathwayBrowser/#/R-HSA-525793
R-HSA-5689901	Metalloprotease DUBs	2	32	0.00217377	0.425436	0.804684	2	6	0.000453549	9606	Homo sapiens	HIST2H2AB;HIST1H2AG		R-HSA-5691381;R-HSA-5691411	https://reactome.org/PathwayBrowser/#/R-HSA-5689901
R-HSA-1474244	Extracellular matrix organization	16	330	0.022417	0.426944	0.804684	81	319	0.0241137	9606	Homo sapiens	ITGA3;SDC3;KLHL11;LTBP1;FBLN2;FMNL1;COL5A1;COL7A1;ITGA10;MFAP2;MYH9;COL9A2;ADAMTS9;PLEC		R-HSA-8948232;R-HSA-2002460;R-HSA-8948234;R-HSA-114563;R-HSA-2471842;R-HSA-8948224;R-HSA-8948226;R-HSA-8948228;R-HSA-8948230;R-HSA-8948231;R-HSA-1564184;R-HSA-204434;R-HSA-3788075;R-HSA-1564164;R-HSA-2214324;R-HSA-2327733;R-HSA-2002440;R-HSA-2327738;R-HSA-4084903;R-HSA-2466238;R-HSA-2214330;R-HSA-2466106;R-HSA-2161282;R-HSA-2022073;R-HSA-4084501;R-HSA-2327695;R-HSA-1981104;R-HSA-1474213;R-HSA-145…	https://reactome.org/PathwayBrowser/#/R-HSA-1474244
R-HSA-8854518	AURKA Activation by TPX2	4	74	0.00502683	0.431513	0.804684	2	2	0.000151183	9606	Homo sapiens	TUBA1A;CEP164;CEP250;PCNT		R-HSA-8853405;R-HSA-8853419	https://reactome.org/PathwayBrowser/#/R-HSA-8854518
R-HSA-73886	Chromosome Maintenance	7	138	0.00937436	0.434406	0.804684	13	38	0.00287248	9606	Homo sapiens	HIST1H2BO;HIST1H4B;HIST4H4;HIST1H4H;HIST1H2BG;L1CAM;HIST1H4C;HIST1H2BD;HIST1H4E		R-HSA-174439;R-HSA-606287;R-HSA-9670101;R-HSA-181450;R-HSA-174447;R-HSA-9670114;R-HSA-9668902;R-HSA-9670149;R-HSA-174452;R-HSA-606289;R-HSA-9668904;R-HSA-176700;R-HSA-606326	https://reactome.org/PathwayBrowser/#/R-HSA-73886
R-HSA-194840	Rho GTPase cycle	8	160	0.0108688	0.438611	0.804684	2	12	0.000907098	9606	Homo sapiens	AKAP13;ARHGAP11B;OBSCN;ARHGAP40;PLEKHG5;ARAP3;ARHGAP23		R-HSA-194913;R-HSA-194922	https://reactome.org/PathwayBrowser/#/R-HSA-194840
R-HSA-212165	Epigenetic regulation of gene expression	7	139	0.00944229	0.441674	0.804684	20	34	0.00257011	9606	Homo sapiens	HIST1H2BO;HIST1H4B;HIST4H4;HIST1H4H;HIST1H2BG;HIST1H3B;HIST1H4C;HIST1H2BD;HIST1H4E		R-HSA-5334097;R-HSA-427527;R-HSA-5334160;R-HSA-5334099;R-HSA-212263;R-HSA-5334164;R-HSA-5250938;R-HSA-5227490;R-HSA-433672;R-HSA-212269;R-HSA-427528;R-HSA-427336;R-HSA-427337;R-HSA-427383;R-HSA-5334179;R-HSA-5334151;R-HSA-5334152;R-HSA-427514;R-HSA-212222;R-HSA-212252	https://reactome.org/PathwayBrowser/#/R-HSA-212165
R-HSA-75153	Apoptotic execution phase	3	54	0.00366823	0.442658	0.804684	4	57	0.00430872	9606	Homo sapiens	HIST1H1E;CLSPN;PLEC		R-HSA-211239;R-HSA-351936;R-HSA-201637;R-HSA-211247	https://reactome.org/PathwayBrowser/#/R-HSA-75153
R-HSA-1300642	Sperm Motility And Taxes	1	13	0.000883092	0.445275	0.804684	2	4	0.000302366	9606	Homo sapiens	CATSPERG		R-HSA-2534359;R-HSA-2534388	https://reactome.org/PathwayBrowser/#/R-HSA-1300642
R-HSA-2151209	Activation of PPARGC1A (PGC-1alpha) by phosphorylation	1	13	0.000883092	0.445275	0.804684	1	2	0.000151183	9606	Homo sapiens	MAPK11		R-HSA-1592233	https://reactome.org/PathwayBrowser/#/R-HSA-2151209
R-HSA-2022923	Dermatan sulfate biosynthesis	1	13	0.000883092	0.445275	0.804684	1	4	0.000302366	9606	Homo sapiens	CHST14		R-HSA-2022063	https://reactome.org/PathwayBrowser/#/R-HSA-2022923
R-HSA-140342	Apoptosis induced DNA fragmentation	1	13	0.000883092	0.445275	0.804684	2	12	0.000907098	9606	Homo sapiens	HIST1H1E		R-HSA-211239;R-HSA-211247	https://reactome.org/PathwayBrowser/#/R-HSA-140342
R-HSA-1296346	Tandem pore domain potassium channels	1	13	0.000883092	0.445275	0.804684	1	6	0.000453549	9606	Homo sapiens	KCNK3		R-HSA-1299318	https://reactome.org/PathwayBrowser/#/R-HSA-1296346
R-HSA-74749	Signal attenuation	1	13	0.000883092	0.445275	0.804684	1	7	0.000529141	9606	Homo sapiens	GRB10		R-HSA-110011	https://reactome.org/PathwayBrowser/#/R-HSA-74749
R-HSA-380320	Recruitment of NuMA to mitotic centrosomes	5	97	0.00658923	0.44811	0.804684	2	2	0.000151183	9606	Homo sapiens	TUBA1A;NUMA1;CEP164;CEP250;PCNT		R-HSA-380316;R-HSA-380508	https://reactome.org/PathwayBrowser/#/R-HSA-380320
R-HSA-8955332	Carboxyterminal post-translational modifications of tubulin	3	55	0.00373616	0.454374	0.804684	6	6	0.000453549	9606	Homo sapiens	TUBA1A;LRRC49;VASH1		R-HSA-8955706;R-HSA-8955869;R-HSA-8955712;R-HSA-8865774;R-HSA-8867370;R-HSA-8866105	https://reactome.org/PathwayBrowser/#/R-HSA-8955332
R-HSA-5620912	Anchoring of the basal body to the plasma membrane	5	99	0.00672509	0.465479	0.804684	8	9	0.000680324	9606	Homo sapiens	TUBA1A;FBF1;CEP164;CEP250;PCNT		R-HSA-5626228;R-HSA-5626227;R-HSA-5626220;R-HSA-5626223;R-HSA-5626681;R-HSA-5617816;R-HSA-5626699;R-HSA-5638009	https://reactome.org/PathwayBrowser/#/R-HSA-5620912
R-HSA-373080	Class B/2 (Secretin family receptors)	5	99	0.00672509	0.465479	0.804684	4	20	0.00151183	9606	Homo sapiens	WNT10B;RAMP2;WNT7B;WNT9A;RAMP1		R-HSA-420214;R-HSA-420127;R-HSA-201708;R-HSA-420265	https://reactome.org/PathwayBrowser/#/R-HSA-373080
R-HSA-112308	Presynaptic depolarization and calcium channel opening	1	14	0.000951022	0.46987	0.804684	1	1	7.55915e-05	9606	Homo sapiens	CACNB3		R-HSA-210420	https://reactome.org/PathwayBrowser/#/R-HSA-112308
R-HSA-75205	Dissolution of Fibrin Clot	1	14	0.000951022	0.46987	0.804684	6	19	0.00143624	9606	Homo sapiens	PLAU		R-HSA-158982;R-HSA-159001;R-HSA-158942;R-HSA-158959;R-HSA-159005;R-HSA-158925	https://reactome.org/PathwayBrowser/#/R-HSA-75205
R-HSA-425381	Bicarbonate transporters	1	14	0.000951022	0.46987	0.804684	1	4	0.000302366	9606	Homo sapiens	SLC4A3		R-HSA-425482	https://reactome.org/PathwayBrowser/#/R-HSA-425381
R-HSA-9614399	Regulation of localization of FOXO transcription factors	1	14	0.000951022	0.46987	0.804684	1	5	0.000377958	9606	Homo sapiens	FOXO3B		R-HSA-199299	https://reactome.org/PathwayBrowser/#/R-HSA-9614399
R-HSA-9635465	Suppression of apoptosis	1	14	0.000951022	0.46987	0.804684	1	7	0.000529141	9606	Homo sapiens	RNF213		R-HSA-9635609	https://reactome.org/PathwayBrowser/#/R-HSA-9635465
R-HSA-391908	Prostanoid ligand receptors	1	14	0.000951022	0.46987	0.804684	1	8	0.000604732	9606	Homo sapiens	PTGIR		R-HSA-391942	https://reactome.org/PathwayBrowser/#/R-HSA-391908
R-HSA-9662834	CD163 mediating an anti-inflammatory response	1	14	0.000951022	0.46987	0.804684	1	9	0.000680324	9606	Homo sapiens	MYH9		R-HSA-9663426	https://reactome.org/PathwayBrowser/#/R-HSA-9662834
R-HSA-450282	MAPK targets/ Nuclear events mediated by MAP kinases	2	35	0.00237756	0.470706	0.804684	3	16	0.00120946	9606	Homo sapiens	MAPK11;DYRK3		R-HSA-168053;R-HSA-198669;R-HSA-199917	https://reactome.org/PathwayBrowser/#/R-HSA-450282
R-HSA-5693568	Resolution of D-loop Structures through Holliday Junction Intermediates	2	36	0.00244549	0.485316	0.804684	8	9	0.000680324	9606	Homo sapiens	EME2;PLEC		R-HSA-5686469;R-HSA-5686483;R-HSA-5693539;R-HSA-5693584;R-HSA-5686430;R-HSA-5686410;R-HSA-5686475;R-HSA-5686440	https://reactome.org/PathwayBrowser/#/R-HSA-5693568
R-HSA-2424491	DAP12 signaling	2	36	0.00244549	0.485316	0.804684	10	17	0.00128506	9606	Homo sapiens	KLRK1;KLRC2		R-HSA-2395412;R-HSA-2424484;R-HSA-210289;R-HSA-2424486;R-HSA-2424487;R-HSA-2424480;R-HSA-2396594;R-HSA-2424482;R-HSA-2395439;R-HSA-2395801	https://reactome.org/PathwayBrowser/#/R-HSA-2424491
R-HSA-1266695	Interleukin-7 signaling	2	36	0.00244549	0.485316	0.804684	2	26	0.00196538	9606	Homo sapiens	HIST1H3B		R-HSA-8865711;R-HSA-8865613	https://reactome.org/PathwayBrowser/#/R-HSA-1266695
R-HSA-2214320	Anchoring fibril formation	1	15	0.00101895	0.493377	0.804684	4	4	0.000302366	9606	Homo sapiens	COL7A1		R-HSA-2214324;R-HSA-2213195;R-HSA-2214330;R-HSA-2396234	https://reactome.org/PathwayBrowser/#/R-HSA-2214320
R-HSA-3772470	Negative regulation of TCF-dependent signaling by WNT ligand antagonists	1	15	0.00101895	0.493377	0.804684	1	5	0.000377958	9606	Homo sapiens	WNT9A		R-HSA-3769370	https://reactome.org/PathwayBrowser/#/R-HSA-3772470
R-HSA-1502540	Signaling by Activin	1	15	0.00101895	0.493377	0.804684	1	10	0.000755915	9606	Homo sapiens	CCDC88C		R-HSA-1225919	https://reactome.org/PathwayBrowser/#/R-HSA-1502540
R-HSA-5693537	Resolution of D-Loop Structures	2	37	0.00251342	0.499672	0.804684	9	10	0.000755915	9606	Homo sapiens	EME2;PLEC		R-HSA-5693589;R-HSA-5686469;R-HSA-5686483;R-HSA-5693539;R-HSA-5693584;R-HSA-5686430;R-HSA-5686410;R-HSA-5686475;R-HSA-5686440	https://reactome.org/PathwayBrowser/#/R-HSA-5693537
R-HSA-9645723	Diseases of programmed cell death	2	37	0.00251342	0.499672	0.804684	7	24	0.0018142	9606	Homo sapiens	CDKN2A;FOXO3B		R-HSA-8870710;R-HSA-8870628;R-HSA-9645766;R-HSA-8870703;R-HSA-8870686;R-HSA-8870558;R-HSA-8870698	https://reactome.org/PathwayBrowser/#/R-HSA-9645723
R-HSA-380270	Recruitment of mitotic centrosome proteins and complexes	4	81	0.00550234	0.499969	0.804684	3	3	0.000226775	9606	Homo sapiens	TUBA1A;CEP164;CEP250;PCNT		R-HSA-380311;R-HSA-380455;R-HSA-380283	https://reactome.org/PathwayBrowser/#/R-HSA-380270
R-HSA-1474228	Degradation of the extracellular matrix	7	148	0.0100537	0.50615	0.804684	12	105	0.00793711	9606	Homo sapiens	COL5A1;COL7A1;MYH9;COL9A2;ADAMTS9		R-HSA-2485111;R-HSA-3788075;R-HSA-1564164;R-HSA-1474213;R-HSA-1454757;R-HSA-1474210;R-HSA-2473584;R-HSA-2471842;R-HSA-2537499;R-HSA-1592310;R-HSA-1564184;R-HSA-1564120	https://reactome.org/PathwayBrowser/#/R-HSA-1474228
R-HSA-111465	Apoptotic cleavage of cellular proteins	2	38	0.00258135	0.513768	0.804684	2	38	0.00287248	9606	Homo sapiens	CLSPN;PLEC		R-HSA-351936;R-HSA-201637	https://reactome.org/PathwayBrowser/#/R-HSA-111465
R-HSA-2197563	NOTCH2 intracellular domain regulates transcription	1	16	0.00108688	0.515842	0.804684	9	9	0.000680324	9606	Homo sapiens	MAML3		R-HSA-2976716;R-HSA-2127285;R-HSA-2197588;R-HSA-2976551;R-HSA-2976742;R-HSA-2976726;R-HSA-2197562;R-HSA-2197564;R-HSA-2976563	https://reactome.org/PathwayBrowser/#/R-HSA-2197563
R-HSA-3656237	Defective EXT2 causes exostoses 2	1	16	0.00108688	0.515842	0.804684	4	4	0.000302366	9606	Homo sapiens	SDC3		R-HSA-9036289;R-HSA-3656254;R-HSA-9036290;R-HSA-3656267	https://reactome.org/PathwayBrowser/#/R-HSA-3656237
R-HSA-3656253	Defective EXT1 causes exostoses 1, TRPS2 and CHDS	1	16	0.00108688	0.515842	0.804684	4	4	0.000302366	9606	Homo sapiens	SDC3		R-HSA-9036283;R-HSA-3656261;R-HSA-9036285;R-HSA-3656257	https://reactome.org/PathwayBrowser/#/R-HSA-3656253
R-HSA-8941856	RUNX3 regulates NOTCH signaling	1	16	0.00108688	0.515842	0.804684	5	7	0.000529141	9606	Homo sapiens	MAML3		R-HSA-1980047;R-HSA-8878243;R-HSA-4396347;R-HSA-8878237;R-HSA-8878220	https://reactome.org/PathwayBrowser/#/R-HSA-8941856
R-HSA-9617629	Regulation of FOXO transcriptional activity by acetylation	1	16	0.00108688	0.515842	0.804684	2	9	0.000680324	9606	Homo sapiens	FOXO3B		R-HSA-9620515;R-HSA-9620532	https://reactome.org/PathwayBrowser/#/R-HSA-9617629
R-HSA-75892	Platelet Adhesion to exposed collagen	1	16	0.00108688	0.515842	0.804684	1	6	0.000453549	9606	Homo sapiens	ITGA10		R-HSA-114563	https://reactome.org/PathwayBrowser/#/R-HSA-75892
R-HSA-5687613	Diseases associated with surfactant metabolism	1	16	0.00108688	0.515842	0.804684	1	7	0.000529141	9606	Homo sapiens	ABCA3		R-HSA-5688397	https://reactome.org/PathwayBrowser/#/R-HSA-5687613
R-HSA-5661231	Metallothioneins bind metals	1	16	0.00108688	0.515842	0.804684	2	27	0.00204097	9606	Homo sapiens	MT1F		R-HSA-5662596;R-HSA-5662623	https://reactome.org/PathwayBrowser/#/R-HSA-5661231
R-HSA-380287	Centrosome maturation	4	83	0.0056382	0.518882	0.804684	6	6	0.000453549	9606	Homo sapiens	TUBA1A;CEP164;CEP250;PCNT		R-HSA-380311;R-HSA-380455;R-HSA-380294;R-HSA-380272;R-HSA-380303;R-HSA-380283	https://reactome.org/PathwayBrowser/#/R-HSA-380287
R-HSA-3000171	Non-integrin membrane-ECM interactions	3	61	0.00414374	0.522273	0.804684	5	22	0.00166301	9606	Homo sapiens	COL5A1;SDC3;COL9A2		R-HSA-2684507;R-HSA-2681694;R-HSA-2465890;R-HSA-2327738;R-HSA-2731075	https://reactome.org/PathwayBrowser/#/R-HSA-3000171
R-HSA-5083635	Defective B3GALTL causes Peters-plus syndrome (PpS)	2	39	0.00264928	0.5276	0.804684	1	1	7.55915e-05	9606	Homo sapiens	ADAMTS9;ADAMTS7		R-HSA-6785565	https://reactome.org/PathwayBrowser/#/R-HSA-5083635
R-HSA-9668328	Sealing of the nuclear envelope (NE) by ESCRT-III	2	39	0.00264928	0.5276	0.804684	5	7	0.000529141	9606	Homo sapiens	TUBA1A;PLEKHG5		R-HSA-9668419;R-HSA-9668389;R-HSA-9668405;R-HSA-9668395;R-HSA-9668415	https://reactome.org/PathwayBrowser/#/R-HSA-9668328
R-HSA-2173796	SMAD2/SMAD3:SMAD4 heterotrimer regulates transcription	2	39	0.00264928	0.5276	0.804684	1	17	0.00128506	9606	Homo sapiens	CDKN2B		R-HSA-2187303	https://reactome.org/PathwayBrowser/#/R-HSA-2173796
R-HSA-373760	L1CAM interactions	6	130	0.00883092	0.537176	0.804684	34	54	0.00408194	9606	Homo sapiens	NRP1;SPTBN5;TUBA1A;ITGA10;L1CAM;SPTBN2		R-HSA-443783;R-HSA-443780;R-HSA-443778;R-HSA-443779;R-HSA-374669;R-HSA-445071;R-HSA-445069;R-HSA-443784;R-HSA-374677;R-HSA-445079;R-HSA-445076;R-HSA-445077;R-HSA-374673;R-HSA-374672;R-HSA-374675;R-HSA-445084;R-HSA-374686;R-HSA-374681;R-HSA-445083;R-HSA-374680;R-HSA-374683;R-HSA-445088;R-HSA-445089;R-HSA-392749;R-HSA-437230;R-HSA-392748;R-HSA-392751;R-HSA-374696;R-HSA-373736;R-HSA-373739;R-HSA-443…	https://reactome.org/PathwayBrowser/#/R-HSA-373760
R-HSA-9661069	Defective binding of RB1 mutants to E2F1,(E2F2, E2F3)	1	17	0.00115481	0.537313	0.804684	1	1	7.55915e-05	9606	Homo sapiens	CCND2		R-HSA-9659782	https://reactome.org/PathwayBrowser/#/R-HSA-9661069
R-HSA-9659787	Aberrant regulation of mitotic G1/S transition in cancer due to RB1 defects	1	17	0.00115481	0.537313	0.804684	1	2	0.000151183	9606	Homo sapiens	CCND2		R-HSA-9659782	https://reactome.org/PathwayBrowser/#/R-HSA-9659787
R-HSA-2559584	Formation of Senescence-Associated Heterochromatin Foci (SAHF)	1	17	0.00115481	0.537313	0.804684	1	2	0.000151183	9606	Homo sapiens	HIST1H1E		R-HSA-4647594	https://reactome.org/PathwayBrowser/#/R-HSA-2559584
R-HSA-5676594	TNF receptor superfamily (TNFSF) members mediating non-canonical NF-kB pathway	1	17	0.00115481	0.537313	0.804684	3	12	0.000907098	9606	Homo sapiens	LTB		R-HSA-5668789;R-HSA-5676593;R-HSA-5676591	https://reactome.org/PathwayBrowser/#/R-HSA-5676594
R-HSA-196843	Vitamin B2 (riboflavin) metabolism	1	17	0.00115481	0.537313	0.804684	1	5	0.000377958	9606	Homo sapiens	FMN1		R-HSA-196964	https://reactome.org/PathwayBrowser/#/R-HSA-196843
R-HSA-9610379	HCMV Late Events	8	175	0.0118878	0.537889	0.804684	1	19	0.00143624	9606	Homo sapiens	HIST1H2BO;HIST1H4B;HIST4H4;HIST2H2AB;HIST1H4H;HIST1H2AG;HIST1H2BG;HIST1H3B;HIST1H4C;HIST2H2BF;HIST1H2BD;HIST1H4E		R-HSA-9698928	https://reactome.org/PathwayBrowser/#/R-HSA-9610379
R-HSA-390522	Striated Muscle Contraction	2	40	0.00271721	0.541163	0.804684	4	4	0.000302366	9606	Homo sapiens	TPM4;TNNT3		R-HSA-390597;R-HSA-390598;R-HSA-390593;R-HSA-390595	https://reactome.org/PathwayBrowser/#/R-HSA-390522
R-HSA-168638	NOD1/2 Signaling Pathway	2	40	0.00271721	0.541163	0.804684	1	18	0.00136065	9606	Homo sapiens	MAPK11;PLEKHG5		R-HSA-1247960	https://reactome.org/PathwayBrowser/#/R-HSA-168638
R-HSA-193648	NRAGE signals death through JNK	3	63	0.0042796	0.543864	0.804684	1	7	0.000529141	9606	Homo sapiens	AKAP13;OBSCN;PLEKHG5		R-HSA-205039	https://reactome.org/PathwayBrowser/#/R-HSA-193648
R-HSA-8957275	Post-translational protein phosphorylation	5	109	0.00740439	0.54931	0.804684	1	1	7.55915e-05	9606	Homo sapiens	FAM171A2;VGF;GOLM1;LTBP1;FSTL1		R-HSA-8952289	https://reactome.org/PathwayBrowser/#/R-HSA-8957275
R-HSA-5173105	O-linked glycosylation	6	132	0.00896678	0.551951	0.804684	20	28	0.00211656	9606	Homo sapiens	FMNL1;MUC2;POMK;MYH9;ADAMTS9;ADAMTS7		R-HSA-5694487;R-HSA-977071;R-HSA-977228;R-HSA-5173005;R-HSA-1964505;R-HSA-5173192;R-HSA-913675;R-HSA-1964501;R-HSA-914017;R-HSA-8931653;R-HSA-914018;R-HSA-914012;R-HSA-914008;R-HSA-914010;R-HSA-981497;R-HSA-914005;R-HSA-981814;R-HSA-914006;R-HSA-6786012;R-HSA-981809	https://reactome.org/PathwayBrowser/#/R-HSA-5173105
R-HSA-194315	Signaling by Rho GTPases	21	470	0.0319272	0.556246	0.804684	30	125	0.00944894	9606	Homo sapiens	ARHGAP11B;HIST1H2BO;PLEKHG5;WIPF3;ARAP3;ARHGAP23;FMNL3;AKAP13;MAPK11;FMNL1;HIST1H4B;OBSCN;TUBA1A;ARHGAP40;HIST4H4;MYH9;HIST1H4H;HIST1H2BG;HIST1H3B;HIST1H4C;HIST1H2BD;HIST1H4E		R-HSA-5665686;R-HSA-2029466;R-HSA-5665809;R-HSA-5625883;R-HSA-5625797;R-HSA-5625796;R-HSA-9626880;R-HSA-5668932;R-HSA-5663232;R-HSA-2197691;R-HSA-5625870;R-HSA-2197690;R-HSA-5665802;R-HSA-5672329;R-HSA-194913;R-HSA-2197698;R-HSA-5668978;R-HSA-442592;R-HSA-419232;R-HSA-194922;R-HSA-5625849;R-HSA-5665659;R-HSA-5625848;R-HSA-5625784;R-HSA-5666169;R-HSA-5665767;R-HSA-5665761;R-HSA-5671919;R-HSA-56257…	https://reactome.org/PathwayBrowser/#/R-HSA-194315
R-HSA-399956	CRMPs in Sema3A signaling	1	18	0.00122274	0.557833	0.804684	5	5	0.000377958	9606	Homo sapiens	NRP1		R-HSA-399951;R-HSA-399946;R-HSA-399947;R-HSA-399931;R-HSA-399944	https://reactome.org/PathwayBrowser/#/R-HSA-399956
R-HSA-964739	N-glycan trimming and elongation in the cis-Golgi	1	18	0.00122274	0.557833	0.804684	3	5	0.000377958	9606	Homo sapiens	MAN1C1		R-HSA-964830;R-HSA-964825;R-HSA-964737	https://reactome.org/PathwayBrowser/#/R-HSA-964739
R-HSA-5607763	CLEC7A (Dectin-1) induces NFAT activation	1	18	0.00122274	0.557833	0.804684	2	6	0.000453549	9606	Homo sapiens	ITPR3		R-HSA-169683;R-HSA-169680	https://reactome.org/PathwayBrowser/#/R-HSA-5607763
R-HSA-187687	Signalling to ERKs	2	42	0.00285307	0.567468	0.804684	2	32	0.00241893	9606	Homo sapiens	MAPK11;PLEKHG5		R-HSA-171011;R-HSA-187688	https://reactome.org/PathwayBrowser/#/R-HSA-187687
R-HSA-8948700	Competing endogenous RNAs (ceRNAs) regulate PTEN translation	1	19	0.00129067	0.577445	0.804684	11	11	0.000831507	9606	Homo sapiens	TNRC6B		R-HSA-8948536;R-HSA-8948602;R-HSA-8948651;R-HSA-8948524;R-HSA-8948621;R-HSA-8948623;R-HSA-8948641;R-HSA-8948594;R-HSA-8948612;R-HSA-8948582;R-HSA-8948583	https://reactome.org/PathwayBrowser/#/R-HSA-8948700
R-HSA-399955	SEMA3A-Plexin repulsion signaling by inhibiting Integrin adhesion	1	19	0.00129067	0.577445	0.804684	6	8	0.000604732	9606	Homo sapiens	NRP1		R-HSA-399942;R-HSA-399941;R-HSA-399934;R-HSA-399935;R-HSA-399933;R-HSA-399928	https://reactome.org/PathwayBrowser/#/R-HSA-399955
R-HSA-399954	Sema3A PAK dependent Axon repulsion	1	19	0.00129067	0.577445	0.804684	3	6	0.000453549	9606	Homo sapiens	NRP1		R-HSA-399939;R-HSA-399952;R-HSA-399930	https://reactome.org/PathwayBrowser/#/R-HSA-399954
R-HSA-186712	Regulation of beta-cell development	3	67	0.00455132	0.58529	0.804684	7	26	0.00196538	9606	Homo sapiens	ONECUT1;MAML3		R-HSA-1980047;R-HSA-210769;R-HSA-210784;R-HSA-210837;R-HSA-210836;R-HSA-210824;R-HSA-210767	https://reactome.org/PathwayBrowser/#/R-HSA-186712
R-HSA-5689880	Ub-specific processing proteases	9	206	0.0139936	0.588626	0.804684	4	40	0.00302366	9606	Homo sapiens	HIST1H2BO;HIST2H2AB;HIST1H2AG;HIST1H2BG;CLSPN;HIST2H2BF;HIST1H2BD		R-HSA-5696914;R-HSA-5696960;R-HSA-5690080;R-HSA-5690157	https://reactome.org/PathwayBrowser/#/R-HSA-5689880
R-HSA-1296072	Voltage gated Potassium channels	2	44	0.00298893	0.592667	0.804684	1	1	7.55915e-05	9606	Homo sapiens	KCNF1;KCNAB3		R-HSA-1296127	https://reactome.org/PathwayBrowser/#/R-HSA-1296072
R-HSA-2024096	HS-GAG degradation	2	44	0.00298893	0.592667	0.804684	4	14	0.00105828	9606	Homo sapiens	SDC3;IDS		R-HSA-1678650;R-HSA-1667005;R-HSA-2024084;R-HSA-1678694	https://reactome.org/PathwayBrowser/#/R-HSA-2024096
R-HSA-3769402	Deactivation of the beta-catenin transactivating complex	2	44	0.00298893	0.592667	0.804684	2	14	0.00105828	9606	Homo sapiens	SOX2;KMT2D		R-HSA-3364042;R-HSA-5626938	https://reactome.org/PathwayBrowser/#/R-HSA-3769402
R-HSA-5083625	Defective GALNT3 causes familial hyperphosphatemic tumoral calcinosis (HFTC)	1	20	0.0013586	0.596187	0.804684	1	1	7.55915e-05	9606	Homo sapiens	MUC2		R-HSA-5096537	https://reactome.org/PathwayBrowser/#/R-HSA-5083625
R-HSA-5083636	Defective GALNT12 causes colorectal cancer 1 (CRCS1)	1	20	0.0013586	0.596187	0.804684	1	1	7.55915e-05	9606	Homo sapiens	MUC2		R-HSA-5096532	https://reactome.org/PathwayBrowser/#/R-HSA-5083636
R-HSA-5576886	Phase 4 - resting membrane potential	1	20	0.0013586	0.596187	0.804684	1	2	0.000151183	9606	Homo sapiens	KCNK3		R-HSA-5578910	https://reactome.org/PathwayBrowser/#/R-HSA-5576886
R-HSA-211916	Vitamins	1	20	0.0013586	0.596187	0.804684	1	5	0.000377958	9606	Homo sapiens	CYP26B1		R-HSA-212007	https://reactome.org/PathwayBrowser/#/R-HSA-211916
R-HSA-450604	KSRP (KHSRP) binds and destabilizes mRNA	1	20	0.0013586	0.596187	0.804684	1	5	0.000377958	9606	Homo sapiens	MAPK11		R-HSA-451152	https://reactome.org/PathwayBrowser/#/R-HSA-450604
R-HSA-8963684	Tyrosine catabolism	1	20	0.0013586	0.596187	0.804684	1	6	0.000453549	9606	Homo sapiens	HOXC9		R-HSA-71173	https://reactome.org/PathwayBrowser/#/R-HSA-8963684
R-HSA-111471	Apoptotic factor-mediated response	1	20	0.0013586	0.596187	0.804684	2	28	0.00211656	9606	Homo sapiens	CDKN2A		R-HSA-9645694;R-HSA-9645692	https://reactome.org/PathwayBrowser/#/R-HSA-111471
R-HSA-2565942	Regulation of PLK1 Activity at G2/M Transition	4	92	0.00624958	0.599416	0.804684	4	12	0.000907098	9606	Homo sapiens	TUBA1A;CEP164;CEP250;PCNT		R-HSA-3000319;R-HSA-2574845;R-HSA-3000310;R-HSA-2574840	https://reactome.org/PathwayBrowser/#/R-HSA-2565942
R-HSA-452723	Transcriptional regulation of pluripotent stem cells	2	45	0.00305686	0.604849	0.804684	28	35	0.0026457	9606	Homo sapiens	SOX2		R-HSA-2972975;R-HSA-480515;R-HSA-2972965;R-HSA-452750;R-HSA-2972964;R-HSA-2972967;R-HSA-480204;R-HSA-2972966;R-HSA-2972960;R-HSA-2972962;R-HSA-480470;R-HSA-452894;R-HSA-452958;R-HSA-452701;R-HSA-2972977;R-HSA-2972979;R-HSA-2972978;R-HSA-6800120;R-HSA-452838;R-HSA-452515;R-HSA-480685;R-HSA-452392;R-HSA-1112609;R-HSA-2972956;R-HSA-452338;R-HSA-2972949;R-HSA-2972948;R-HSA-480509	https://reactome.org/PathwayBrowser/#/R-HSA-452723
R-HSA-2892247	POU5F1 (OCT4), SOX2, NANOG activate genes related to proliferation	1	21	0.00142653	0.6141	0.804684	16	16	0.00120946	9606	Homo sapiens	SOX2		R-HSA-2972975;R-HSA-480515;R-HSA-452515;R-HSA-452750;R-HSA-2972964;R-HSA-2972967;R-HSA-2972960;R-HSA-2972962;R-HSA-480470;R-HSA-2972956;R-HSA-452338;R-HSA-452958;R-HSA-480509;R-HSA-452701;R-HSA-2972978;R-HSA-6800120	https://reactome.org/PathwayBrowser/#/R-HSA-2892247
R-HSA-3560783	Defective B4GALT7 causes EDS, progeroid type	1	21	0.00142653	0.6141	0.804684	1	1	7.55915e-05	9606	Homo sapiens	SDC3		R-HSA-3560804	https://reactome.org/PathwayBrowser/#/R-HSA-3560783
R-HSA-4420332	Defective B3GALT6 causes EDSP2 and SEMDJL1	1	21	0.00142653	0.6141	0.804684	1	1	7.55915e-05	9606	Homo sapiens	SDC3		R-HSA-4420365	https://reactome.org/PathwayBrowser/#/R-HSA-4420332
R-HSA-5083632	Defective C1GALT1C1 causes Tn polyagglutination syndrome (TNPS)	1	21	0.00142653	0.6141	0.804684	1	1	7.55915e-05	9606	Homo sapiens	MUC2		R-HSA-6785524	https://reactome.org/PathwayBrowser/#/R-HSA-5083632
R-HSA-5660526	Response to metal ions	1	21	0.00142653	0.6141	0.804684	2	31	0.00234334	9606	Homo sapiens	MT1F		R-HSA-5662596;R-HSA-5662623	https://reactome.org/PathwayBrowser/#/R-HSA-5660526
R-HSA-8878159	Transcriptional regulation by RUNX3	5	118	0.00801576	0.61895	0.804684	10	47	0.0035528	9606	Homo sapiens	CDKN2A;FOXO3B;MAML3		R-HSA-8952232;R-HSA-1980047;R-HSA-8878243;R-HSA-8952382;R-HSA-4396347;R-HSA-8952081;R-HSA-8952226;R-HSA-8878237;R-HSA-8878220;R-HSA-8952101	https://reactome.org/PathwayBrowser/#/R-HSA-8878159
R-HSA-9646399	Aggrephagy	2	47	0.00319272	0.628381	0.804684	13	15	0.00113387	9606	Homo sapiens	TUBA1A;PCNT		R-HSA-9646354;R-HSA-9640114;R-HSA-9639698;R-HSA-9646679;R-HSA-9641111;R-HSA-9646390;R-HSA-9641109;R-HSA-9646685;R-HSA-9641127;R-HSA-9646347;R-HSA-9641096;R-HSA-9646383;R-HSA-9646348	https://reactome.org/PathwayBrowser/#/R-HSA-9646399
R-HSA-3560801	Defective B3GAT3 causes JDSSDHD	1	22	0.00149446	0.631219	0.804684	1	1	7.55915e-05	9606	Homo sapiens	SDC3		R-HSA-3560802	https://reactome.org/PathwayBrowser/#/R-HSA-3560801
R-HSA-190840	Microtubule-dependent trafficking of connexons from Golgi to the plasma membrane	1	22	0.00149446	0.631219	0.804684	1	2	0.000151183	9606	Homo sapiens	TUBA1A		R-HSA-190520	https://reactome.org/PathwayBrowser/#/R-HSA-190840
R-HSA-139853	Elevation of cytosolic Ca2+ levels	1	22	0.00149446	0.631219	0.804684	1	5	0.000377958	9606	Homo sapiens	ITPR3		R-HSA-139854	https://reactome.org/PathwayBrowser/#/R-HSA-139853
R-HSA-3229121	Glycogen storage diseases	1	22	0.00149446	0.631219	0.804684	1	10	0.000755915	9606	Homo sapiens	NHLRC1		R-HSA-3797226	https://reactome.org/PathwayBrowser/#/R-HSA-3229121
R-HSA-1793185	Chondroitin sulfate/dermatan sulfate metabolism	3	73	0.0049589	0.642746	0.804684	7	28	0.00211656	9606	Homo sapiens	SDC3;IDS;CHST14		R-HSA-2022063;R-HSA-1889981;R-HSA-9638064;R-HSA-1793182;R-HSA-1889978;R-HSA-1878002;R-HSA-1889955	https://reactome.org/PathwayBrowser/#/R-HSA-1793185
R-HSA-392851	Prostacyclin signalling through prostacyclin receptor	1	23	0.00156239	0.64758	0.804684	4	4	0.000302366	9606	Homo sapiens	PTGIR		R-HSA-392852;R-HSA-392870;R-HSA-391942;R-HSA-392874	https://reactome.org/PathwayBrowser/#/R-HSA-392851
R-HSA-9614657	FOXO-mediated transcription of cell death genes	1	23	0.00156239	0.64758	0.804684	14	15	0.00113387	9606	Homo sapiens	FOXO3B		R-HSA-9622579;R-HSA-9621270;R-HSA-9621242;R-HSA-9625375;R-HSA-9621116;R-HSA-9625378;R-HSA-9622627;R-HSA-9622630;R-HSA-9614662;R-HSA-9622667;R-HSA-9621289;R-HSA-9622668;R-HSA-9622604;R-HSA-9614669	https://reactome.org/PathwayBrowser/#/R-HSA-9614657
R-HSA-9613829	Chaperone Mediated Autophagy	1	23	0.00156239	0.64758	0.804684	9	19	0.00143624	9606	Homo sapiens	PCNT		R-HSA-9625188;R-HSA-9620197;R-HSA-9622840;R-HSA-9615721;R-HSA-9624158;R-HSA-9622831;R-HSA-9625196;R-HSA-9626060;R-HSA-9625197	https://reactome.org/PathwayBrowser/#/R-HSA-9613829
R-HSA-190872	Transport of connexons to the plasma membrane	1	23	0.00156239	0.64758	0.804684	1	3	0.000226775	9606	Homo sapiens	TUBA1A		R-HSA-190520	https://reactome.org/PathwayBrowser/#/R-HSA-190872
R-HSA-5625900	RHO GTPases activate CIT	1	23	0.00156239	0.64758	0.804684	1	6	0.000453549	9606	Homo sapiens	MYH9		R-HSA-5671919	https://reactome.org/PathwayBrowser/#/R-HSA-5625900
R-HSA-5620922	BBSome-mediated cargo-targeting to cilium	1	24	0.00163032	0.663216	0.804684	2	5	0.000377958	9606	Homo sapiens	SSTR3		R-HSA-5624127;R-HSA-5624126	https://reactome.org/PathwayBrowser/#/R-HSA-5620922
R-HSA-389977	Post-chaperonin tubulin folding pathway	1	25	0.00169825	0.678159	0.804684	6	9	0.000680324	9606	Homo sapiens	TUBA1A		R-HSA-389972;R-HSA-389974;R-HSA-389964;R-HSA-389976;R-HSA-389963;R-HSA-389978	https://reactome.org/PathwayBrowser/#/R-HSA-389977
R-HSA-1482922	Acyl chain remodelling of PI	1	25	0.00169825	0.678159	0.804684	2	6	0.000453549	9606	Homo sapiens	PLA2G4B		R-HSA-1482932;R-HSA-1482825	https://reactome.org/PathwayBrowser/#/R-HSA-1482922
R-HSA-1368082	RORA activates gene expression	1	25	0.00169825	0.678159	0.804684	1	4	0.000302366	9606	Homo sapiens	HELZ2		R-HSA-1801587	https://reactome.org/PathwayBrowser/#/R-HSA-1368082
R-HSA-9609646	HCMV Infection	11	270	0.0183411	0.678853	0.804684	8	31	0.00234334	9606	Homo sapiens	HIST1H2BO;HIST2H2AB;HIST2H2BF;HIST1H4B;TUBA1A;HIST4H4;HIST1H4H;HIST1H2AG;HIST1H2BG;HIST1H3B;HIST1H4C;HIST1H2BD;HIST1H4E		R-HSA-9614816;R-HSA-9621073;R-HSA-9698928;R-HSA-9614343;R-HSA-9614810;R-HSA-9614811;R-HSA-9623096;R-HSA-9614367	https://reactome.org/PathwayBrowser/#/R-HSA-9609646
R-HSA-381426	Regulation of Insulin-like Growth Factor (IGF) transport and uptake by Insulin-like Growth Factor Binding Proteins (IGFBPs)	5	127	0.00862713	0.681812	0.804684	1	14	0.00105828	9606	Homo sapiens	FAM171A2;VGF;GOLM1;LTBP1;FSTL1		R-HSA-8952289	https://reactome.org/PathwayBrowser/#/R-HSA-381426
R-HSA-3906995	Diseases associated with O-glycosylation of proteins	3	78	0.00529855	0.686163	0.804684	4	9	0.000680324	9606	Homo sapiens	MUC2;ADAMTS9;ADAMTS7		R-HSA-6785524;R-HSA-5096537;R-HSA-5096532;R-HSA-6785565	https://reactome.org/PathwayBrowser/#/R-HSA-3906995
R-HSA-2172127	DAP12 interactions	2	53	0.0036003	0.692413	0.804684	12	33	0.00249452	9606	Homo sapiens	KLRK1;KLRC2		R-HSA-2395412;R-HSA-2424484;R-HSA-210289;R-HSA-2424486;R-HSA-2424487;R-HSA-2424480;R-HSA-210295;R-HSA-2396594;R-HSA-2424482;R-HSA-2395439;R-HSA-2395801;R-HSA-2172126	https://reactome.org/PathwayBrowser/#/R-HSA-2172127
R-HSA-9013695	NOTCH4 Intracellular Domain Regulates Transcription	1	26	0.00176618	0.69244	0.804684	8	9	0.000680324	9606	Homo sapiens	MAML3		R-HSA-9604451;R-HSA-9604550;R-HSA-9013693;R-HSA-9604471;R-HSA-9013711;R-HSA-9604664;R-HSA-9604553;R-HSA-9604446	https://reactome.org/PathwayBrowser/#/R-HSA-9013695
R-HSA-5627117	RHO GTPases Activate ROCKs	1	26	0.00176618	0.69244	0.804684	2	7	0.000529141	9606	Homo sapiens	MYH9		R-HSA-419232;R-HSA-419197	https://reactome.org/PathwayBrowser/#/R-HSA-5627117
R-HSA-416572	Sema4D induced cell migration and growth-cone collapse	1	26	0.00176618	0.69244	0.804684	1	7	0.000529141	9606	Homo sapiens	MYH9		R-HSA-419197	https://reactome.org/PathwayBrowser/#/R-HSA-416572
R-HSA-198753	ERK/MAPK targets	1	26	0.00176618	0.69244	0.804684	1	7	0.000529141	9606	Homo sapiens	MAPK11		R-HSA-198669	https://reactome.org/PathwayBrowser/#/R-HSA-198753
R-HSA-3322077	Glycogen synthesis	1	26	0.00176618	0.69244	0.804684	2	24	0.0018142	9606	Homo sapiens	NHLRC1		R-HSA-3781009;R-HSA-3780995	https://reactome.org/PathwayBrowser/#/R-HSA-3322077
R-HSA-1445148	Translocation of SLC2A4 (GLUT4) to the plasma membrane	3	79	0.00536648	0.694356	0.804684	4	15	0.00113387	9606	Homo sapiens	TUBA1A;RALGAPA2;MYH9		R-HSA-1458485;R-HSA-2316352;R-HSA-2316347;R-HSA-1458463	https://reactome.org/PathwayBrowser/#/R-HSA-1445148
R-HSA-3000178	ECM proteoglycans	3	79	0.00536648	0.694356	0.804684	4	23	0.0017386	9606	Homo sapiens	COL5A1;COL9A2		R-HSA-2396370;R-HSA-2327909;R-HSA-2466238;R-HSA-2466106	https://reactome.org/PathwayBrowser/#/R-HSA-3000178
R-HSA-204998	Cell death signalling via NRAGE, NRIF and NADE	3	80	0.00543441	0.702387	0.804684	1	17	0.00128506	9606	Homo sapiens	AKAP13;OBSCN;PLEKHG5		R-HSA-205039	https://reactome.org/PathwayBrowser/#/R-HSA-204998
R-HSA-9617828	FOXO-mediated transcription of cell cycle genes	1	27	0.00183411	0.706089	0.804684	18	22	0.00166301	9606	Homo sapiens	FOXO3B		R-HSA-9620915;R-HSA-9617840;R-HSA-9624976;R-HSA-9618004;R-HSA-9620788;R-HSA-9620891;R-HSA-9617848;R-HSA-9624985;R-HSA-9625406;R-HSA-9617852;R-HSA-9620828;R-HSA-9617853;R-HSA-9625409;R-HSA-9618021;R-HSA-9620837;R-HSA-9617838;R-HSA-9617996;R-HSA-9620813	https://reactome.org/PathwayBrowser/#/R-HSA-9617828
R-HSA-450302	activated TAK1 mediates p38 MAPK activation	1	27	0.00183411	0.706089	0.804684	3	5	0.000377958	9606	Homo sapiens	MAPK11		R-HSA-450257;R-HSA-450222;R-HSA-450333	https://reactome.org/PathwayBrowser/#/R-HSA-450302
R-HSA-5627123	RHO GTPases activate PAKs	1	27	0.00183411	0.706089	0.804684	3	15	0.00113387	9606	Homo sapiens	MYH9		R-HSA-5668932;R-HSA-5668978;R-HSA-419232	https://reactome.org/PathwayBrowser/#/R-HSA-5627123
R-HSA-4086398	Ca2+ pathway	3	81	0.00550234	0.710256	0.804684	7	27	0.00204097	9606	Homo sapiens	GNAO1;ITPR3;TNRC6B		R-HSA-169680;R-HSA-4420052;R-HSA-3965444;R-HSA-3965447;R-HSA-4518575;R-HSA-3965441;R-HSA-4518585	https://reactome.org/PathwayBrowser/#/R-HSA-4086398
R-HSA-437239	Recycling pathway of L1	2	55	0.00373616	0.711636	0.804684	14	14	0.00105828	9606	Homo sapiens	TUBA1A;L1CAM		R-HSA-443783;R-HSA-443779;R-HSA-445089;R-HSA-392749;R-HSA-445071;R-HSA-392748;R-HSA-374696;R-HSA-373736;R-HSA-374677;R-HSA-445079;R-HSA-555065;R-HSA-445077;R-HSA-445084;R-HSA-374680	https://reactome.org/PathwayBrowser/#/R-HSA-437239
R-HSA-3560782	Diseases associated with glycosaminoglycan metabolism	2	55	0.00373616	0.711636	0.804684	12	29	0.00219215	9606	Homo sapiens	SDC3;CHST14		R-HSA-3636919;R-HSA-3560804;R-HSA-9036283;R-HSA-3656261;R-HSA-3560802;R-HSA-9036285;R-HSA-3656257;R-HSA-9036289;R-HSA-3656254;R-HSA-9036290;R-HSA-3656267;R-HSA-4420365	https://reactome.org/PathwayBrowser/#/R-HSA-3560782
R-HSA-2173793	Transcriptional activity of SMAD2/SMAD3:SMAD4 heterotrimer	2	55	0.00373616	0.711636	0.804684	1	38	0.00287248	9606	Homo sapiens	CDKN2B		R-HSA-2187303	https://reactome.org/PathwayBrowser/#/R-HSA-2173793
R-HSA-977068	Termination of O-glycan biosynthesis	1	28	0.00190204	0.719132	0.804684	5	5	0.000377958	9606	Homo sapiens	MUC2		R-HSA-977071;R-HSA-977228;R-HSA-981497;R-HSA-981814;R-HSA-981809	https://reactome.org/PathwayBrowser/#/R-HSA-977068
R-HSA-350054	Notch-HLH transcription pathway	1	28	0.00190204	0.719132	0.804684	1	2	0.000151183	9606	Homo sapiens	MAML3		R-HSA-212356	https://reactome.org/PathwayBrowser/#/R-HSA-350054
R-HSA-6803205	TP53 regulates transcription of several additional cell death genes whose specific roles in p53-dependent apoptosis remain uncertain	1	28	0.00190204	0.719132	0.804684	3	19	0.00143624	9606	Homo sapiens	LRRC49		R-HSA-6801109;R-HSA-6801089;R-HSA-6801101	https://reactome.org/PathwayBrowser/#/R-HSA-6803205
R-HSA-195258	RHO GTPase Effectors	13	328	0.0222811	0.723502	0.804684	28	113	0.00854184	9606	Homo sapiens	HIST1H2BO;WIPF3;FMNL3;MAPK11;FMNL1;HIST1H4B;TUBA1A;HIST4H4;MYH9;HIST1H4H;HIST1H2BG;HIST1H3B;HIST1H4C;HIST1H2BD;HIST1H4E		R-HSA-5665686;R-HSA-2029466;R-HSA-5665809;R-HSA-5625883;R-HSA-5625797;R-HSA-5625796;R-HSA-9626880;R-HSA-5668932;R-HSA-5663232;R-HSA-2197691;R-HSA-5625870;R-HSA-2197690;R-HSA-5665802;R-HSA-5672329;R-HSA-2197698;R-HSA-5668978;R-HSA-442592;R-HSA-419232;R-HSA-5625849;R-HSA-5665659;R-HSA-5625848;R-HSA-5625784;R-HSA-5666169;R-HSA-5665767;R-HSA-5665761;R-HSA-5671919;R-HSA-5625774;R-HSA-419197	https://reactome.org/PathwayBrowser/#/R-HSA-195258
R-HSA-8943723	Regulation of PTEN mRNA translation	1	29	0.00196997	0.731598	0.804684	24	24	0.0018142	9606	Homo sapiens	TNRC6B		R-HSA-8944650;R-HSA-8944522;R-HSA-2318752;R-HSA-8948651;R-HSA-8944684;R-HSA-8948524;R-HSA-8945709;R-HSA-8948621;R-HSA-8948623;R-HSA-8948641;R-HSA-8944706;R-HSA-8944483;R-HSA-8948612;R-HSA-8948582;R-HSA-8948583;R-HSA-8944632;R-HSA-8948536;R-HSA-8944569;R-HSA-8948569;R-HSA-8944538;R-HSA-8948602;R-HSA-8944497;R-HSA-8948594;R-HSA-8944599	https://reactome.org/PathwayBrowser/#/R-HSA-8943723
R-HSA-389957	Prefoldin mediated transfer of substrate to CCT/TriC	1	29	0.00196997	0.731598	0.804684	2	2	0.000151183	9606	Homo sapiens	TUBA1A		R-HSA-389970;R-HSA-389980	https://reactome.org/PathwayBrowser/#/R-HSA-389957
R-HSA-2024101	CS/DS degradation	1	29	0.00196997	0.731598	0.804684	1	10	0.000755915	9606	Homo sapiens	IDS		R-HSA-1793182	https://reactome.org/PathwayBrowser/#/R-HSA-2024101
R-HSA-1369062	ABC transporters in lipid homeostasis	1	29	0.00196997	0.731598	0.804684	1	11	0.000831507	9606	Homo sapiens	ABCA3		R-HSA-5683714	https://reactome.org/PathwayBrowser/#/R-HSA-1369062
R-HSA-9634638	Estrogen-dependent nuclear events downstream of ESR-membrane signaling	1	29	0.00196997	0.731598	0.804684	1	12	0.000907098	9606	Homo sapiens	FOXO3B		R-HSA-9624526	https://reactome.org/PathwayBrowser/#/R-HSA-9634638
R-HSA-202040	G-protein activation	1	30	0.00203791	0.743511	0.804684	6	6	0.000453549	9606	Homo sapiens	GNAO1		R-HSA-167408;R-HSA-167415;R-HSA-167429;R-HSA-167419;R-HSA-167433;R-HSA-112271	https://reactome.org/PathwayBrowser/#/R-HSA-202040
R-HSA-389960	Formation of tubulin folding intermediates by CCT/TriC	1	30	0.00203791	0.743511	0.804684	2	2	0.000151183	9606	Homo sapiens	TUBA1A		R-HSA-389954;R-HSA-389961	https://reactome.org/PathwayBrowser/#/R-HSA-389960
R-HSA-5693554	Resolution of D-loop Structures through Synthesis-Dependent Strand Annealing (SDSA)	1	30	0.00203791	0.743511	0.804684	1	1	7.55915e-05	9606	Homo sapiens	PLEC		R-HSA-5693589	https://reactome.org/PathwayBrowser/#/R-HSA-5693554
R-HSA-8862803	Deregulated CDK5 triggers multiple neurodegenerative pathways in Alzheimer's disease models	1	30	0.00203791	0.743511	0.804684	6	22	0.00166301	9606	Homo sapiens	FOXO3B		R-HSA-8870710;R-HSA-8870628;R-HSA-8870703;R-HSA-8870686;R-HSA-8870558;R-HSA-8870698	https://reactome.org/PathwayBrowser/#/R-HSA-8862803
R-HSA-8863678	Neurodegenerative Diseases	1	30	0.00203791	0.743511	0.804684	6	22	0.00166301	9606	Homo sapiens	FOXO3B		R-HSA-8870710;R-HSA-8870628;R-HSA-8870703;R-HSA-8870686;R-HSA-8870558;R-HSA-8870698	https://reactome.org/PathwayBrowser/#/R-HSA-8863678
R-HSA-5357956	TNFR1-induced NFkappaB signaling pathway	1	30	0.00203791	0.743511	0.804684	1	5	0.000377958	9606	Homo sapiens	TRAF1		R-HSA-5357780	https://reactome.org/PathwayBrowser/#/R-HSA-5357956
R-HSA-201451	Signaling by BMP	1	30	0.00203791	0.743511	0.804684	1	17	0.00128506	9606	Homo sapiens	FSTL1		R-HSA-201810	https://reactome.org/PathwayBrowser/#/R-HSA-201451
R-HSA-8878171	Transcriptional regulation by RUNX1	10	261	0.0177298	0.744359	0.804684	36	132	0.00997808	9606	Homo sapiens	KMT2D;HIST1H2BO;HIST1H4B;CCND2;HIST4H4;HIST1H4H;HIST1H2BG;HIST1H3B;HIST1H4C;HIST1H2BD;HIST1H4E;TNRC6B		R-HSA-8936584;R-HSA-8938440;R-HSA-8937097;R-HSA-8938507;R-HSA-8937037;R-HSA-8936068;R-HSA-8937113;R-HSA-8937050;R-HSA-8865491;R-HSA-8936989;R-HSA-8937118;R-HSA-8936979;R-HSA-8865498;R-HSA-8935766;R-HSA-8936599;R-HSA-8936616;R-HSA-8935785;R-HSA-8936621;R-HSA-8865505;R-HSA-8937134;R-HSA-8936608;R-HSA-8936481;R-HSA-8936995;R-HSA-8865320;R-HSA-8937016;R-HSA-8935864;R-HSA-8939129;R-HSA-8935930;R-HSA-8…	https://reactome.org/PathwayBrowser/#/R-HSA-8878171
R-HSA-373752	Netrin-1 signaling	2	59	0.00400788	0.747065	0.804684	1	37	0.00279689	9606	Homo sapiens	MAPK11;PLEKHG5		R-HSA-451366	https://reactome.org/PathwayBrowser/#/R-HSA-373752
R-HSA-186797	Signaling by PDGF	3	86	0.00584199	0.747209	0.804684	1	31	0.00234334	9606	Homo sapiens	COL5A1;COL9A2		R-HSA-382054	https://reactome.org/PathwayBrowser/#/R-HSA-186797
R-HSA-416482	G alpha (12/13) signalling events	3	87	0.00590992	0.75413	0.804684	1	15	0.00113387	9606	Homo sapiens	AKAP13;OBSCN;PLEKHG5		R-HSA-419166	https://reactome.org/PathwayBrowser/#/R-HSA-416482
R-HSA-1971475	A tetrasaccharide linker sequence is required for GAG synthesis	1	31	0.00210584	0.754896	0.804684	5	5	0.000377958	9606	Homo sapiens	SDC3		R-HSA-1889981;R-HSA-9638064;R-HSA-1889978;R-HSA-1878002;R-HSA-1889955	https://reactome.org/PathwayBrowser/#/R-HSA-1971475
R-HSA-174411	Polymerase switching on the C-strand of the telomere	1	31	0.00210584	0.754896	0.804684	5	6	0.000453549	9606	Homo sapiens	L1CAM		R-HSA-174439;R-HSA-9668902;R-HSA-174452;R-HSA-9668904;R-HSA-174447	https://reactome.org/PathwayBrowser/#/R-HSA-174411
R-HSA-204174	Regulation of pyruvate dehydrogenase (PDH) complex	1	31	0.00210584	0.754896	0.804684	1	4	0.000302366	9606	Homo sapiens	HOXC9		R-HSA-9011595	https://reactome.org/PathwayBrowser/#/R-HSA-204174
R-HSA-1187000	Fertilization	1	31	0.00210584	0.754896	0.804684	2	9	0.000680324	9606	Homo sapiens	CATSPERG		R-HSA-2534359;R-HSA-2534388	https://reactome.org/PathwayBrowser/#/R-HSA-1187000
R-HSA-5218921	VEGFR2 mediated cell proliferation	1	31	0.00210584	0.754896	0.804684	2	12	0.000907098	9606	Homo sapiens	ITPR3		R-HSA-169683;R-HSA-169680	https://reactome.org/PathwayBrowser/#/R-HSA-5218921
R-HSA-2453864	Retinoid cycle disease events	1	31	0.00210584	0.754896	0.804684	1	16	0.00120946	9606	Homo sapiens	ABCA3		R-HSA-2466802	https://reactome.org/PathwayBrowser/#/R-HSA-2453864
R-HSA-2474795	Diseases associated with visual transduction	1	31	0.00210584	0.754896	0.804684	1	17	0.00128506	9606	Homo sapiens	ABCA3		R-HSA-2466802	https://reactome.org/PathwayBrowser/#/R-HSA-2474795
R-HSA-9675143	Diseases of the neuronal system	1	31	0.00210584	0.754896	0.804684	1	17	0.00128506	9606	Homo sapiens	ABCA3		R-HSA-2466802	https://reactome.org/PathwayBrowser/#/R-HSA-9675143
R-HSA-6794361	Neurexins and neuroligins	2	60	0.00407581	0.755318	0.804684	6	19	0.00143624	9606	Homo sapiens	EPB41L1;DLGAP1		R-HSA-6794357;R-HSA-6797554;R-HSA-6794338;R-HSA-6797553;R-HSA-6797568;R-HSA-6794344	https://reactome.org/PathwayBrowser/#/R-HSA-6794361
R-HSA-9006936	Signaling by TGFB family members	4	114	0.00774404	0.758516	0.804684	3	107	0.00808829	9606	Homo sapiens	CDKN2B;CCDC88C;FSTL1		R-HSA-201810;R-HSA-2187303;R-HSA-1225919	https://reactome.org/PathwayBrowser/#/R-HSA-9006936
R-HSA-6806834	Signaling by MET	3	88	0.00597785	0.760898	0.804684	1	49	0.00370398	9606	Homo sapiens	COL5A1;ITGA3;COL9A2		R-HSA-8874079	https://reactome.org/PathwayBrowser/#/R-HSA-6806834
R-HSA-400042	Adrenaline,noradrenaline inhibits insulin secretion	1	32	0.00217377	0.765777	0.804684	1	6	0.000453549	9606	Homo sapiens	CACNB3		R-HSA-400046	https://reactome.org/PathwayBrowser/#/R-HSA-400042
R-HSA-400685	Sema4D in semaphorin signaling	1	32	0.00217377	0.765777	0.804684	1	13	0.00098269	9606	Homo sapiens	MYH9		R-HSA-419197	https://reactome.org/PathwayBrowser/#/R-HSA-400685
R-HSA-5674400	Constitutive Signaling by AKT1 E17K in Cancer	1	32	0.00217377	0.765777	0.804684	1	18	0.00136065	9606	Homo sapiens	FOXO3B		R-HSA-2399992	https://reactome.org/PathwayBrowser/#/R-HSA-5674400
R-HSA-3928663	EPHA-mediated growth cone collapse	1	33	0.0022417	0.776175	0.804684	1	4	0.000302366	9606	Homo sapiens	MYH9		R-HSA-3928616	https://reactome.org/PathwayBrowser/#/R-HSA-3928663
R-HSA-9607240	FLT3 Signaling	2	64	0.00434753	0.786038	0.804684	7	43	0.00325043	9606	Homo sapiens	GRB10;FOXO3B		R-HSA-9706340;R-HSA-9706308;R-HSA-9699574;R-HSA-9699575;R-HSA-9706344;R-HSA-9706345;R-HSA-9699579	https://reactome.org/PathwayBrowser/#/R-HSA-9607240
R-HSA-9619483	Activation of AMPK downstream of NMDARs	1	34	0.00230963	0.786112	0.804684	1	3	0.000226775	9606	Homo sapiens	TUBA1A		R-HSA-9619542	https://reactome.org/PathwayBrowser/#/R-HSA-9619483
R-HSA-1483166	Synthesis of PA	2	65	0.00441546	0.793168	0.804684	2	17	0.00128506	9606	Homo sapiens	PLA2G4B		R-HSA-1482656;R-HSA-1482604	https://reactome.org/PathwayBrowser/#/R-HSA-1483166
R-HSA-9615710	Late endosomal microautophagy	1	35	0.00237756	0.795608	0.804684	3	3	0.000226775	9606	Homo sapiens	PCNT		R-HSA-9631065;R-HSA-9615721;R-HSA-9631068	https://reactome.org/PathwayBrowser/#/R-HSA-9615710
R-HSA-418360	Platelet calcium homeostasis	1	35	0.00237756	0.795608	0.804684	1	8	0.000604732	9606	Homo sapiens	ITPR3		R-HSA-139854	https://reactome.org/PathwayBrowser/#/R-HSA-418360
R-HSA-8856688	Golgi-to-ER retrograde transport	5	148	0.0100537	0.799847	0.804684	5	18	0.00136065	9606	Homo sapiens	TUBA1A;KIF1C;BICD1;RAB6B;BICD2		R-HSA-8849350;R-HSA-8849348;R-HSA-6811426;R-HSA-6811423;R-HSA-8849353	https://reactome.org/PathwayBrowser/#/R-HSA-8856688
R-HSA-9013508	NOTCH3 Intracellular Domain Regulates Transcription	1	36	0.00244549	0.804684	0.804684	20	22	0.00166301	9606	Homo sapiens	MAML3		R-HSA-9021480;R-HSA-9021451;R-HSA-9021450;R-HSA-9018538;R-HSA-9021325;R-HSA-9016751;R-HSA-9018542;R-HSA-9013568;R-HSA-9021412;R-HSA-9021478;R-HSA-9016861;R-HSA-9014141;R-HSA-9013567;R-HSA-9013631;R-HSA-9021406;R-HSA-9014129;R-HSA-9013488;R-HSA-9016916;R-HSA-9013652;R-HSA-9017398	https://reactome.org/PathwayBrowser/#/R-HSA-9013508
R-HSA-9687139	Aberrant regulation of mitotic cell cycle due to RB1 defects	1	36	0.00244549	0.804684	0.804684	1	3	0.000226775	9606	Homo sapiens	CCND2		R-HSA-9659782	https://reactome.org/PathwayBrowser/#/R-HSA-9687139
R-HSA-5626467	RHO GTPases activate IQGAPs	1	36	0.00244549	0.804684	0.804684	1	5	0.000377958	9606	Homo sapiens	TUBA1A		R-HSA-5672329	https://reactome.org/PathwayBrowser/#/R-HSA-5626467
R-HSA-2206281	Mucopolysaccharidoses	1	36	0.00244549	0.804684	0.804684	2	22	0.00166301	9606	Homo sapiens	IDS		R-HSA-2262743;R-HSA-9036046	https://reactome.org/PathwayBrowser/#/R-HSA-2206281
R-HSA-391903	Eicosanoid ligand-binding receptors	1	36	0.00244549	0.804684	0.804684	1	14	0.00105828	9606	Homo sapiens	PTGIR		R-HSA-391942	https://reactome.org/PathwayBrowser/#/R-HSA-391903
R-HSA-8873719	RAB geranylgeranylation	2	68	0.00461925	0.813314	0.813314	4	5	0.000377958	9606	Homo sapiens	LRRC49;RAB6B		R-HSA-8870469;R-HSA-8870466;R-HSA-8870465;R-HSA-8870461	https://reactome.org/PathwayBrowser/#/R-HSA-8873719
R-HSA-983189	Kinesins	2	68	0.00461925	0.813314	0.813314	2	14	0.00105828	9606	Homo sapiens	TUBA1A;KIF1C		R-HSA-983259;R-HSA-983266	https://reactome.org/PathwayBrowser/#/R-HSA-983189
R-HSA-389958	Cooperation of Prefoldin and TriC/CCT in actin and tubulin folding	1	37	0.00251342	0.813357	0.813357	4	6	0.000453549	9606	Homo sapiens	TUBA1A		R-HSA-389970;R-HSA-389954;R-HSA-389980;R-HSA-389961	https://reactome.org/PathwayBrowser/#/R-HSA-389958
R-HSA-5694530	Cargo concentration in the ER	1	37	0.00251342	0.813357	0.813357	4	12	0.000907098	9606	Homo sapiens	COL7A1		R-HSA-5694436;R-HSA-5694435;R-HSA-5694522;R-HSA-5694427	https://reactome.org/PathwayBrowser/#/R-HSA-5694530
R-HSA-399719	Trafficking of AMPA receptors	1	37	0.00251342	0.813357	0.813357	1	4	0.000302366	9606	Homo sapiens	EPB41L1		R-HSA-416320	https://reactome.org/PathwayBrowser/#/R-HSA-399719
R-HSA-8963693	Aspartate and asparagine metabolism	1	37	0.00251342	0.813357	0.813357	1	11	0.000831507	9606	Homo sapiens	ZFHX2		R-HSA-6787757	https://reactome.org/PathwayBrowser/#/R-HSA-8963693
R-HSA-8939211	ESR-mediated signaling	9	256	0.0173901	0.81927	0.81927	21	110	0.00831507	9606	Homo sapiens	HIST1H2BO;HIST1H4B;HIST4H4;HIST1H4H;FOXO3B;HIST1H2BG;HIST1H3B;HIST1H4C;HIST1H2BD;HIST1H4E;TNRC6B		R-HSA-9009065;R-HSA-9012203;R-HSA-9011981;R-HSA-9011949;R-HSA-9011983;R-HSA-9011950;R-HSA-9012000;R-HSA-9009378;R-HSA-9011941;R-HSA-9012196;R-HSA-9011975;R-HSA-9011961;R-HSA-9009371;R-HSA-9012186;R-HSA-9011966;R-HSA-9011985;R-HSA-9011952;R-HSA-9011984;R-HSA-9012208;R-HSA-9624526;R-HSA-9011958	https://reactome.org/PathwayBrowser/#/R-HSA-8939211
R-HSA-450294	MAP kinase activation	2	69	0.00468718	0.81963	0.81963	6	32	0.00241893	9606	Homo sapiens	MAPK11;DYRK3		R-HSA-168053;R-HSA-450257;R-HSA-450222;R-HSA-450333;R-HSA-198669;R-HSA-199917	https://reactome.org/PathwayBrowser/#/R-HSA-450294
R-HSA-1980145	Signaling by NOTCH2	1	38	0.00258135	0.821646	0.821646	9	20	0.00151183	9606	Homo sapiens	MAML3		R-HSA-2976716;R-HSA-2127285;R-HSA-2197588;R-HSA-2976551;R-HSA-2976742;R-HSA-2976726;R-HSA-2197562;R-HSA-2197564;R-HSA-2976563	https://reactome.org/PathwayBrowser/#/R-HSA-1980145
R-HSA-9675126	Diseases of mitotic cell cycle	1	38	0.00258135	0.821646	0.821646	1	5	0.000377958	9606	Homo sapiens	CCND2		R-HSA-9659782	https://reactome.org/PathwayBrowser/#/R-HSA-9675126
R-HSA-5668599	RHO GTPases Activate NADPH Oxidases	1	38	0.00258135	0.821646	0.821646	1	14	0.00105828	9606	Homo sapiens	MAPK11		R-HSA-9626880	https://reactome.org/PathwayBrowser/#/R-HSA-5668599
R-HSA-168643	Nucleotide-binding domain, leucine rich repeat containing receptor (NLR) signaling pathways	2	70	0.00475511	0.825754	0.825754	1	46	0.00347721	9606	Homo sapiens	MAPK11;PLEKHG5		R-HSA-1247960	https://reactome.org/PathwayBrowser/#/R-HSA-168643
R-HSA-157118	Signaling by NOTCH	9	258	0.017526	0.825941	0.825941	67	154	0.0116411	9606	Homo sapiens	HIST1H2BO;HIST1H4B;HIST4H4;HIST1H4H;HIST1H2BG;MAML3;HIST1H3B;HIST1H4C;HIST1H2BD;HIST1H4E;TNRC6B		R-HSA-9021451;R-HSA-1606682;R-HSA-9021450;R-HSA-9021325;R-HSA-2976551;R-HSA-4396371;R-HSA-1980047;R-HSA-9016861;R-HSA-2127285;R-HSA-4396379;R-HSA-2197562;R-HSA-4396382;R-HSA-2197564;R-HSA-9013652;R-HSA-2976563;R-HSA-9021480;R-HSA-9018538;R-HSA-9016751;R-HSA-9018542;R-HSA-9604664;R-HSA-1912368;R-HSA-9021478;R-HSA-1980078;R-HSA-1912364;R-HSA-1912367;R-HSA-1912366;R-HSA-9013693;R-HSA-9013567;R-HSA-1…	https://reactome.org/PathwayBrowser/#/R-HSA-157118
R-HSA-176187	Activation of ATR in response to replication stress	1	39	0.00264928	0.829567	0.829567	2	9	0.000680324	9606	Homo sapiens	CLSPN		R-HSA-176298;R-HSA-176318	https://reactome.org/PathwayBrowser/#/R-HSA-176187
R-HSA-9022692	Regulation of MECP2 expression and activity	1	39	0.00264928	0.829567	0.829567	3	14	0.00105828	9606	Homo sapiens	TNRC6B		R-HSA-9021183;R-HSA-9021182;R-HSA-9615501	https://reactome.org/PathwayBrowser/#/R-HSA-9022692
R-HSA-399721	Glutamate binding, activation of AMPA receptors and synaptic plasticity	1	39	0.00264928	0.829567	0.829567	1	9	0.000680324	9606	Homo sapiens	EPB41L1		R-HSA-416320	https://reactome.org/PathwayBrowser/#/R-HSA-399721
R-HSA-5365859	RA biosynthesis pathway	1	39	0.00264928	0.829567	0.829567	1	11	0.000831507	9606	Homo sapiens	CYP26B1		R-HSA-5362525	https://reactome.org/PathwayBrowser/#/R-HSA-5365859
R-HSA-9037629	Lewis blood group biosynthesis	1	39	0.00264928	0.829567	0.829567	1	13	0.00098269	9606	Homo sapiens	FUT4		R-HSA-9603984	https://reactome.org/PathwayBrowser/#/R-HSA-9037629
R-HSA-5658442	Regulation of RAS by GAPs	2	71	0.00482304	0.83169	0.83169	5	5	0.000377958	9606	Homo sapiens	SPRED3;RASA3		R-HSA-5658438;R-HSA-5658231;R-HSA-5658435;R-HSA-5658430;R-HSA-5658424	https://reactome.org/PathwayBrowser/#/R-HSA-5658442
R-HSA-112043	PLC beta mediated events	2	71	0.00482304	0.83169	0.83169	5	32	0.00241893	9606	Homo sapiens	GNAO1;ITPR3		R-HSA-169683;R-HSA-169680;R-HSA-112037;R-HSA-111879;R-HSA-111870	https://reactome.org/PathwayBrowser/#/R-HSA-112043
R-HSA-2022928	HS-GAG biosynthesis	1	40	0.00271721	0.837137	0.837137	13	14	0.00105828	9606	Homo sapiens	SDC3		R-HSA-2076383;R-HSA-2076508;R-HSA-2076371;R-HSA-2024108;R-HSA-2022860;R-HSA-2022856;R-HSA-2076392;R-HSA-2022887;R-HSA-2022919;R-HSA-2024100;R-HSA-2076419;R-HSA-2076611;R-HSA-2022851	https://reactome.org/PathwayBrowser/#/R-HSA-2022928
R-HSA-114508	Effects of PIP2 hydrolysis	1	40	0.00271721	0.837137	0.837137	2	9	0.000680324	9606	Homo sapiens	ITPR3		R-HSA-139941;R-HSA-139854	https://reactome.org/PathwayBrowser/#/R-HSA-114508
R-HSA-5685942	HDR through Homologous Recombination (HRR)	2	72	0.00489097	0.837443	0.837443	12	19	0.00143624	9606	Homo sapiens	EME2;PLEC		R-HSA-5693620;R-HSA-5693589;R-HSA-5686469;R-HSA-5686483;R-HSA-5693539;R-HSA-5693584;R-HSA-5685838;R-HSA-5686430;R-HSA-5686410;R-HSA-5686475;R-HSA-5686440;R-HSA-5693593	https://reactome.org/PathwayBrowser/#/R-HSA-5685942
R-HSA-373755	Semaphorin interactions	2	72	0.00489097	0.837443	0.837443	15	41	0.00309925	9606	Homo sapiens	NRP1;MYH9		R-HSA-399942;R-HSA-399941;R-HSA-399939;R-HSA-399951;R-HSA-399946;R-HSA-399947;R-HSA-399944;R-HSA-399952;R-HSA-399934;R-HSA-399935;R-HSA-399933;R-HSA-419197;R-HSA-399930;R-HSA-399931;R-HSA-399928	https://reactome.org/PathwayBrowser/#/R-HSA-373755
R-HSA-112040	G-protein mediated events	2	72	0.00489097	0.837443	0.837443	5	41	0.00309925	9606	Homo sapiens	GNAO1;ITPR3		R-HSA-169683;R-HSA-169680;R-HSA-112037;R-HSA-111879;R-HSA-111870	https://reactome.org/PathwayBrowser/#/R-HSA-112040
R-HSA-5663213	RHO GTPases Activate WASPs and WAVEs	1	41	0.00278514	0.844371	0.844371	5	10	0.000755915	9606	Homo sapiens	WIPF3		R-HSA-2197698;R-HSA-2029466;R-HSA-442592;R-HSA-2197691;R-HSA-2197690	https://reactome.org/PathwayBrowser/#/R-HSA-5663213
R-HSA-5357905	Regulation of TNFR1 signaling	1	41	0.00278514	0.844371	0.844371	3	17	0.00128506	9606	Homo sapiens	TRAF1		R-HSA-5634228;R-HSA-5693108;R-HSA-5634221	https://reactome.org/PathwayBrowser/#/R-HSA-5357905
R-HSA-400253	Circadian Clock	3	104	0.00706474	0.849877	0.849877	6	59	0.0044599	9606	Homo sapiens	HELZ2;BHLHE41		R-HSA-879724;R-HSA-1368065;R-HSA-879770;R-HSA-5663105;R-HSA-1801587;R-HSA-549493	https://reactome.org/PathwayBrowser/#/R-HSA-400253
R-HSA-6783310	Fanconi Anemia Pathway	1	42	0.00285307	0.851284	0.851284	2	13	0.00098269	9606	Homo sapiens	EME2		R-HSA-6785732;R-HSA-6785986	https://reactome.org/PathwayBrowser/#/R-HSA-6783310
R-HSA-6804757	Regulation of TP53 Degradation	1	43	0.002921	0.85789	0.85789	3	30	0.00226775	9606	Homo sapiens	CDKN2A		R-HSA-6804998;R-HSA-6804996;R-HSA-6804879	https://reactome.org/PathwayBrowser/#/R-HSA-6804757
R-HSA-8963691	Phenylalanine and tyrosine metabolism	1	43	0.002921	0.85789	0.85789	1	12	0.000907098	9606	Homo sapiens	HOXC9		R-HSA-71173	https://reactome.org/PathwayBrowser/#/R-HSA-8963691
R-HSA-8982491	Glycogen metabolism	1	43	0.002921	0.85789	0.85789	2	39	0.00294807	9606	Homo sapiens	NHLRC1		R-HSA-3781009;R-HSA-3780995	https://reactome.org/PathwayBrowser/#/R-HSA-8982491
R-HSA-8853659	RET signaling	1	43	0.002921	0.85789	0.85789	1	24	0.0018142	9606	Homo sapiens	GRB10		R-HSA-8853753	https://reactome.org/PathwayBrowser/#/R-HSA-8853659
R-HSA-6807878	COPI-mediated anterograde transport	3	107	0.00726853	0.862914	0.862914	6	12	0.000907098	9606	Homo sapiens	SPTBN5;TUBA1A;SPTBN2		R-HSA-6807877;R-HSA-6809011;R-HSA-6807875;R-HSA-6809010;R-HSA-6809006;R-HSA-6809003	https://reactome.org/PathwayBrowser/#/R-HSA-6807878
R-HSA-1296071	Potassium Channels	3	107	0.00726853	0.862914	0.862914	2	19	0.00143624	9606	Homo sapiens	KCNF1;KCNAB3;KCNK3		R-HSA-1299318;R-HSA-1296127	https://reactome.org/PathwayBrowser/#/R-HSA-1296071
R-HSA-448424	Interleukin-17 signaling	2	77	0.00523062	0.86362	0.86362	6	35	0.0026457	9606	Homo sapiens	MAPK11;DYRK3		R-HSA-168053;R-HSA-450257;R-HSA-450222;R-HSA-450333;R-HSA-198669;R-HSA-199917	https://reactome.org/PathwayBrowser/#/R-HSA-448424
R-HSA-5693579	Homologous DNA Pairing and Strand Exchange	1	44	0.00298893	0.864204	0.864204	2	8	0.000604732	9606	Homo sapiens	PLEC		R-HSA-5693620;R-HSA-5685838	https://reactome.org/PathwayBrowser/#/R-HSA-5693579
R-HSA-71064	Lysine catabolism	1	44	0.00298893	0.864204	0.864204	1	13	0.00098269	9606	Homo sapiens	SLC25A21		R-HSA-372480	https://reactome.org/PathwayBrowser/#/R-HSA-71064
R-HSA-6814122	Cooperation of PDCL (PhLP1) and TRiC/CCT in G-protein beta folding	1	45	0.00305686	0.870237	0.870237	1	11	0.000831507	9606	Homo sapiens	GNAO1		R-HSA-8850560	https://reactome.org/PathwayBrowser/#/R-HSA-6814122
R-HSA-193704	p75 NTR receptor-mediated signalling	3	109	0.00740439	0.871044	0.871044	1	50	0.00377958	9606	Homo sapiens	AKAP13;OBSCN;PLEKHG5		R-HSA-205039	https://reactome.org/PathwayBrowser/#/R-HSA-193704
R-HSA-6806003	Regulation of TP53 Expression and Degradation	1	46	0.00312479	0.876003	0.876003	3	35	0.0026457	9606	Homo sapiens	CDKN2A		R-HSA-6804998;R-HSA-6804996;R-HSA-6804879	https://reactome.org/PathwayBrowser/#/R-HSA-6806003
R-HSA-3108214	SUMOylation of DNA damage response and repair proteins	2	81	0.00550234	0.881718	0.881718	2	24	0.0018142	9606	Homo sapiens	HERC2;CDKN2A		R-HSA-4551724;R-HSA-4568846	https://reactome.org/PathwayBrowser/#/R-HSA-3108214
R-HSA-5663084	Diseases of carbohydrate metabolism	2	81	0.00550234	0.881718	0.881718	3	44	0.00332603	9606	Homo sapiens	IDS;NHLRC1		R-HSA-3797226;R-HSA-2262743;R-HSA-9036046	https://reactome.org/PathwayBrowser/#/R-HSA-5663084
R-HSA-389948	PD-1 signaling	1	48	0.00326065	0.886778	0.886778	5	5	0.000377958	9606	Homo sapiens	PDCD1		R-HSA-389762;R-HSA-388828;R-HSA-389759;R-HSA-389758;R-HSA-9679421	https://reactome.org/PathwayBrowser/#/R-HSA-389948
R-HSA-6811438	Intra-Golgi traffic	1	48	0.00326065	0.886778	0.886778	2	10	0.000755915	9606	Homo sapiens	MAN1C1		R-HSA-8847635;R-HSA-8847544	https://reactome.org/PathwayBrowser/#/R-HSA-6811438
R-HSA-3000480	Scavenging by Class A Receptors	1	48	0.00326065	0.886778	0.886778	1	10	0.000755915	9606	Homo sapiens	COL9A2		R-HSA-3221843	https://reactome.org/PathwayBrowser/#/R-HSA-3000480
R-HSA-69620	Cell Cycle Checkpoints	9	280	0.0190204	0.887331	0.887331	5	56	0.00423312	9606	Homo sapiens	HIST1H2BO;HIST1H4B;HERC2;CDKN2A;HIST4H4;HIST1H4H;HIST1H2BG;CLSPN;HIST1H4C;HIST1H2BD;HIST1H4E		R-HSA-5683735;R-HSA-69891;R-HSA-176298;R-HSA-6804879;R-HSA-176318	https://reactome.org/PathwayBrowser/#/R-HSA-69620
R-HSA-194138	Signaling by VEGF	4	144	0.00978194	0.891002	0.891002	5	86	0.00650087	9606	Homo sapiens	NRP1;MAPK11;PLEKHG5;ITPR3		R-HSA-169683;R-HSA-169680;R-HSA-195408;R-HSA-187688;R-HSA-5218804	https://reactome.org/PathwayBrowser/#/R-HSA-194138
R-HSA-9615017	FOXO-mediated transcription of oxidative stress, metabolic and neuronal genes	1	49	0.00332858	0.89181	0.89181	16	34	0.00257011	9606	Homo sapiens	FOXO3B		R-HSA-9622738;R-HSA-9623280;R-HSA-9624624;R-HSA-9622737;R-HSA-9623281;R-HSA-9623415;R-HSA-9617972;R-HSA-9625749;R-HSA-9623192;R-HSA-9625693;R-HSA-9623427;R-HSA-9625091;R-HSA-9624611;R-HSA-9623168;R-HSA-9625092;R-HSA-9617833	https://reactome.org/PathwayBrowser/#/R-HSA-9615017
R-HSA-381676	Glucagon-like Peptide-1 (GLP1) regulates insulin secretion	1	49	0.00332858	0.89181	0.89181	1	11	0.000831507	9606	Homo sapiens	ITPR3		R-HSA-381644	https://reactome.org/PathwayBrowser/#/R-HSA-381676
R-HSA-9609736	Assembly and cell surface presentation of NMDA receptors	1	49	0.00332858	0.89181	0.89181	2	23	0.0017386	9606	Homo sapiens	TUBA1A		R-HSA-9610627;R-HSA-9610408	https://reactome.org/PathwayBrowser/#/R-HSA-9609736
R-HSA-8854214	TBC/RABGAPs	1	49	0.00332858	0.89181	0.89181	1	14	0.00105828	9606	Homo sapiens	RAB6B		R-HSA-8854303	https://reactome.org/PathwayBrowser/#/R-HSA-8854214
R-HSA-170834	Signaling by TGF-beta Receptor Complex	2	85	0.00577406	0.897574	0.897574	1	82	0.0061985	9606	Homo sapiens	CDKN2B		R-HSA-2187303	https://reactome.org/PathwayBrowser/#/R-HSA-170834
R-HSA-174417	Telomere C-strand (Lagging Strand) Synthesis	1	51	0.00346444	0.901213	0.901213	5	18	0.00136065	9606	Homo sapiens	L1CAM		R-HSA-174439;R-HSA-9668902;R-HSA-174452;R-HSA-9668904;R-HSA-174447	https://reactome.org/PathwayBrowser/#/R-HSA-174417
R-HSA-75893	TNF signaling	1	51	0.00346444	0.901213	0.901213	4	32	0.00241893	9606	Homo sapiens	TRAF1		R-HSA-5634228;R-HSA-5693108;R-HSA-5357780;R-HSA-5634221	https://reactome.org/PathwayBrowser/#/R-HSA-75893
R-HSA-9637690	Response of Mtb to phagocytosis	1	51	0.00346444	0.901213	0.901213	1	30	0.00226775	9606	Homo sapiens	RNF213		R-HSA-9635609	https://reactome.org/PathwayBrowser/#/R-HSA-9637690
R-HSA-5688426	Deubiquitination	9	288	0.0195639	0.904692	0.904692	7	77	0.00582055	9606	Homo sapiens	HIST1H2BO;HIST2H2AB;HIST1H2AG;HIST1H2BG;CLSPN;HIST2H2BF;HIST1H2BD		R-HSA-5690790;R-HSA-5691381;R-HSA-5696914;R-HSA-5691411;R-HSA-5696960;R-HSA-5690080;R-HSA-5690157	https://reactome.org/PathwayBrowser/#/R-HSA-5688426
R-HSA-9033658	Blood group systems biosynthesis	1	52	0.00353237	0.905604	0.905604	1	22	0.00166301	9606	Homo sapiens	FUT4		R-HSA-9603984	https://reactome.org/PathwayBrowser/#/R-HSA-9033658
R-HSA-5683826	Surfactant metabolism	1	52	0.00353237	0.905604	0.905604	1	29	0.00219215	9606	Homo sapiens	ABCA3		R-HSA-5683714	https://reactome.org/PathwayBrowser/#/R-HSA-5683826
R-HSA-1638091	Heparan sulfate/heparin (HS-GAG) metabolism	2	88	0.00597785	0.908143	0.908143	22	33	0.00249452	9606	Homo sapiens	SDC3;IDS		R-HSA-2076383;R-HSA-1889981;R-HSA-9638064;R-HSA-2076508;R-HSA-1678650;R-HSA-1667005;R-HSA-1889978;R-HSA-2024084;R-HSA-2076371;R-HSA-1878002;R-HSA-2024108;R-HSA-2022860;R-HSA-2022856;R-HSA-2076392;R-HSA-2022887;R-HSA-2022919;R-HSA-2024100;R-HSA-2076419;R-HSA-2076611;R-HSA-2022851;R-HSA-1889955;R-HSA-1678694	https://reactome.org/PathwayBrowser/#/R-HSA-1638091
R-HSA-2995410	Nuclear Envelope (NE) Reassembly	2	88	0.00597785	0.908143	0.908143	5	24	0.0018142	9606	Homo sapiens	TUBA1A;PLEKHG5		R-HSA-9668419;R-HSA-9668389;R-HSA-9668405;R-HSA-9668395;R-HSA-9668415	https://reactome.org/PathwayBrowser/#/R-HSA-2995410
R-HSA-2672351	Stimuli-sensing channels	3	120	0.00815162	0.908561	0.908561	7	28	0.00211656	9606	Homo sapiens	CLCNKB;MEIS3;SLC9B1		R-HSA-2744361;R-HSA-9659568;R-HSA-5333671;R-HSA-2872444;R-HSA-2744242;R-HSA-2744228;R-HSA-2684901	https://reactome.org/PathwayBrowser/#/R-HSA-2672351
R-HSA-5617833	Cilium Assembly	6	208	0.0141295	0.909322	0.909322	18	50	0.00377958	9606	Homo sapiens	TUBA1A;FBF1;CEP164;CEP250;PCNT;SSTR3		R-HSA-5624949;R-HSA-5626228;R-HSA-5625424;R-HSA-5626227;R-HSA-5625426;R-HSA-5624127;R-HSA-5624126;R-HSA-5626681;R-HSA-5617816;R-HSA-5624952;R-HSA-5618328;R-HSA-5618331;R-HSA-5638009;R-HSA-5625421;R-HSA-5626220;R-HSA-5626223;R-HSA-5625416;R-HSA-5626699	https://reactome.org/PathwayBrowser/#/R-HSA-5617833
R-HSA-1489509	DAG and IP3 signaling	1	53	0.0036003	0.909801	0.909801	2	28	0.00211656	9606	Homo sapiens	ITPR3		R-HSA-169683;R-HSA-169680	https://reactome.org/PathwayBrowser/#/R-HSA-1489509
R-HSA-1614558	Degradation of cysteine and homocysteine	1	53	0.0036003	0.909801	0.909801	1	23	0.0017386	9606	Homo sapiens	ZFHX2		R-HSA-6814165	https://reactome.org/PathwayBrowser/#/R-HSA-1614558
R-HSA-9663891	Selective autophagy	2	89	0.00604578	0.911433	0.911433	13	48	0.00362839	9606	Homo sapiens	TUBA1A;PCNT		R-HSA-9646354;R-HSA-9640114;R-HSA-9639698;R-HSA-9646679;R-HSA-9641111;R-HSA-9646390;R-HSA-9641109;R-HSA-9646685;R-HSA-9641127;R-HSA-9646347;R-HSA-9641096;R-HSA-9646383;R-HSA-9646348	https://reactome.org/PathwayBrowser/#/R-HSA-9663891
R-HSA-2514859	Inactivation, recovery and regulation of the phototransduction cascade	1	54	0.00366823	0.913811	0.913811	2	19	0.00143624	9606	Homo sapiens	RGS9BP		R-HSA-2584246;R-HSA-74615	https://reactome.org/PathwayBrowser/#/R-HSA-2514859
R-HSA-445355	Smooth Muscle Contraction	1	55	0.00373616	0.917642	0.917642	4	11	0.000831507	9606	Homo sapiens	TPM4		R-HSA-445700;R-HSA-445699;R-HSA-445704;R-HSA-445705	https://reactome.org/PathwayBrowser/#/R-HSA-445355
R-HSA-6811440	Retrograde transport at the Trans-Golgi-Network	1	55	0.00373616	0.917642	0.917642	4	20	0.00151183	9606	Homo sapiens	RAB6B		R-HSA-6811431;R-HSA-6811429;R-HSA-6811428;R-HSA-6814682	https://reactome.org/PathwayBrowser/#/R-HSA-6811440
R-HSA-5620920	Cargo trafficking to the periciliary membrane	1	55	0.00373616	0.917642	0.917642	2	27	0.00204097	9606	Homo sapiens	SSTR3		R-HSA-5624127;R-HSA-5624126	https://reactome.org/PathwayBrowser/#/R-HSA-5620920
R-HSA-5620924	Intraflagellar transport	1	56	0.00380409	0.921304	0.921304	6	12	0.000907098	9606	Homo sapiens	TUBA1A		R-HSA-5624949;R-HSA-5625424;R-HSA-5625426;R-HSA-5625421;R-HSA-5624952;R-HSA-5625416	https://reactome.org/PathwayBrowser/#/R-HSA-5620924
R-HSA-6781823	Formation of TC-NER Pre-Incision Complex	1	56	0.00380409	0.921304	0.921304	2	7	0.000529141	9606	Homo sapiens	UVSSA		R-HSA-6782069;R-HSA-6782004	https://reactome.org/PathwayBrowser/#/R-HSA-6781823
R-HSA-6794362	Protein-protein interactions at synapses	2	93	0.00631751	0.923519	0.923519	6	33	0.00249452	9606	Homo sapiens	EPB41L1;DLGAP1		R-HSA-6794357;R-HSA-6797554;R-HSA-6794338;R-HSA-6797553;R-HSA-6797568;R-HSA-6794344	https://reactome.org/PathwayBrowser/#/R-HSA-6794362
R-HSA-2122947	NOTCH1 Intracellular Domain Regulates Transcription	1	57	0.00387202	0.924803	0.924803	11	18	0.00136065	9606	Homo sapiens	MAML3		R-HSA-4396371;R-HSA-1980078;R-HSA-1980047;R-HSA-1912393;R-HSA-1912394;R-HSA-4396347;R-HSA-4396379;R-HSA-1912391;R-HSA-1980067;R-HSA-4396382;R-HSA-1980065	https://reactome.org/PathwayBrowser/#/R-HSA-2122947
R-HSA-8941858	Regulation of RUNX3 expression and activity	1	57	0.00387202	0.924803	0.924803	1	9	0.000680324	9606	Homo sapiens	CDKN2A		R-HSA-8952382	https://reactome.org/PathwayBrowser/#/R-HSA-8941858
R-HSA-2453902	The canonical retinoid cycle in rods (twilight vision)	1	57	0.00387202	0.924803	0.924803	2	25	0.00188979	9606	Homo sapiens	ABCA3		R-HSA-2466749;R-HSA-1467466	https://reactome.org/PathwayBrowser/#/R-HSA-2453902
R-HSA-70268	Pyruvate metabolism	1	57	0.00387202	0.924803	0.924803	1	15	0.00113387	9606	Homo sapiens	HOXC9		R-HSA-9011595	https://reactome.org/PathwayBrowser/#/R-HSA-70268
R-HSA-975871	MyD88 cascade initiated on plasma membrane	2	94	0.00638544	0.926288	0.926288	6	58	0.00438431	9606	Homo sapiens	MAPK11;DYRK3		R-HSA-168053;R-HSA-450257;R-HSA-450222;R-HSA-450333;R-HSA-198669;R-HSA-199917	https://reactome.org/PathwayBrowser/#/R-HSA-975871
R-HSA-168176	Toll Like Receptor 5 (TLR5) Cascade	2	94	0.00638544	0.926288	0.926288	6	59	0.0044599	9606	Homo sapiens	MAPK11;DYRK3		R-HSA-168053;R-HSA-450257;R-HSA-450222;R-HSA-450333;R-HSA-198669;R-HSA-199917	https://reactome.org/PathwayBrowser/#/R-HSA-168176
R-HSA-168142	Toll Like Receptor 10 (TLR10) Cascade	2	94	0.00638544	0.926288	0.926288	6	59	0.0044599	9606	Homo sapiens	MAPK11;DYRK3		R-HSA-168053;R-HSA-450257;R-HSA-450222;R-HSA-450333;R-HSA-198669;R-HSA-199917	https://reactome.org/PathwayBrowser/#/R-HSA-168142
R-HSA-73887	Death Receptor Signalling	4	158	0.010733	0.927213	0.927213	5	93	0.00703001	9606	Homo sapiens	AKAP13;OBSCN;PLEKHG5;TRAF1		R-HSA-5634228;R-HSA-5693108;R-HSA-5357780;R-HSA-5634221;R-HSA-205039	https://reactome.org/PathwayBrowser/#/R-HSA-73887
R-HSA-6804756	Regulation of TP53 Activity through Phosphorylation	2	95	0.00645337	0.928963	0.928963	3	26	0.00196538	9606	Homo sapiens	MAPK11;DYRK3		R-HSA-6798374;R-HSA-6798372;R-HSA-3239014	https://reactome.org/PathwayBrowser/#/R-HSA-6804756
R-HSA-381038	XBP1(S) activates chaperone genes	2	95	0.00645337	0.928963	0.928963	1	47	0.0035528	9606	Homo sapiens	PLA2G4B		R-HSA-1791071	https://reactome.org/PathwayBrowser/#/R-HSA-381038
R-HSA-9660821	ADORA2B mediated anti-inflammatory cytokines production	4	159	0.0108009	0.92933	0.92933	1	12	0.000907098	9606	Homo sapiens	RAMP2;PTGIR;GPR150;RAMP1		R-HSA-9660824	https://reactome.org/PathwayBrowser/#/R-HSA-9660821
R-HSA-6811442	Intra-Golgi and retrograde Golgi-to-ER traffic	6	218	0.0148088	0.929587	0.929587	11	48	0.00362839	9606	Homo sapiens	TUBA1A;MAN1C1;KIF1C;BICD1;RAB6B;BICD2		R-HSA-6811431;R-HSA-8849350;R-HSA-6811429;R-HSA-6811428;R-HSA-8849348;R-HSA-8847635;R-HSA-6811426;R-HSA-6811423;R-HSA-6814682;R-HSA-8849353;R-HSA-8847544	https://reactome.org/PathwayBrowser/#/R-HSA-6811442
R-HSA-2514856	The phototransduction cascade	1	59	0.00400788	0.931343	0.931343	2	27	0.00204097	9606	Homo sapiens	RGS9BP		R-HSA-2584246;R-HSA-74615	https://reactome.org/PathwayBrowser/#/R-HSA-2514856
R-HSA-69541	Stabilization of p53	1	59	0.00400788	0.931343	0.931343	1	15	0.00113387	9606	Homo sapiens	CDKN2A		R-HSA-6804879	https://reactome.org/PathwayBrowser/#/R-HSA-69541
R-HSA-4085001	Sialic acid metabolism	1	60	0.00407581	0.934396	0.934396	1	21	0.00158742	9606	Homo sapiens	ST8SIA5		R-HSA-4084978	https://reactome.org/PathwayBrowser/#/R-HSA-4085001
R-HSA-5689603	UCH proteinases	2	98	0.00665716	0.936447	0.936447	1	11	0.000831507	9606	Homo sapiens	HIST2H2AB;HIST1H2AG		R-HSA-5690790	https://reactome.org/PathwayBrowser/#/R-HSA-5689603
R-HSA-9639288	Amino acids regulate mTORC1	1	61	0.00414374	0.937314	0.937314	5	12	0.000907098	9606	Homo sapiens	SZT2		R-HSA-9657619;R-HSA-9640195;R-HSA-9639287;R-HSA-9640254;R-HSA-9640237	https://reactome.org/PathwayBrowser/#/R-HSA-9639288
R-HSA-109606	Intrinsic Pathway for Apoptosis	1	61	0.00414374	0.937314	0.937314	2	62	0.00468667	9606	Homo sapiens	CDKN2A		R-HSA-9645694;R-HSA-9645692	https://reactome.org/PathwayBrowser/#/R-HSA-109606
R-HSA-68886	M Phase	13	416	0.0282589	0.938065	0.938065	25	91	0.00687883	9606	Homo sapiens	HIST1H2BO;NUMA1;PLEKHG5;CEP164;HIST1H4B;TUBA1A;HIST4H4;HIST1H4H;CEP250;HIST1H2BG;HIST1H3B;HIST1H4C;PCNT;HIST1H2BD;HIST1H4E		R-HSA-2245218;R-HSA-9648017;R-HSA-2288097;R-HSA-375302;R-HSA-2467809;R-HSA-2467811;R-HSA-1638803;R-HSA-2294574;R-HSA-9668419;R-HSA-2294580;R-HSA-380316;R-HSA-380508;R-HSA-2468287;R-HSA-2294590;R-HSA-9648114;R-HSA-9668405;R-HSA-2172678;R-HSA-2294600;R-HSA-9668415;R-HSA-380278;R-HSA-2484822;R-HSA-9668389;R-HSA-2301205;R-HSA-9668395;R-HSA-1638821	https://reactome.org/PathwayBrowser/#/R-HSA-68886
R-HSA-199977	ER to Golgi Anterograde Transport	4	164	0.0111405	0.939105	0.939105	19	39	0.00294807	9606	Homo sapiens	SPTBN5;TUBA1A;COL7A1;SPTBN2		R-HSA-6807877;R-HSA-6807875;R-HSA-5694418;R-HSA-203973;R-HSA-5694417;R-HSA-6809006;R-HSA-5694527;R-HSA-204008;R-HSA-6809003;R-HSA-5694522;R-HSA-5694427;R-HSA-5694439;R-HSA-5694436;R-HSA-6809011;R-HSA-6809010;R-HSA-5694435;R-HSA-5694446;R-HSA-5694441;R-HSA-5694409	https://reactome.org/PathwayBrowser/#/R-HSA-199977
R-HSA-4420097	VEGFA-VEGFR2 Pathway	3	133	0.00903471	0.939985	0.939985	4	79	0.00597173	9606	Homo sapiens	MAPK11;PLEKHG5;ITPR3		R-HSA-169683;R-HSA-169680;R-HSA-187688;R-HSA-5218804	https://reactome.org/PathwayBrowser/#/R-HSA-4420097
R-HSA-4551638	SUMOylation of chromatin organization proteins	1	62	0.00421167	0.940102	0.940102	2	15	0.00113387	9606	Homo sapiens	HIST1H4B;HIST4H4;HIST1H4H;HIST1H4C;HIST1H4E		R-HSA-4570485;R-HSA-4570496	https://reactome.org/PathwayBrowser/#/R-HSA-4551638
R-HSA-418597	G alpha (z) signalling events	1	62	0.00421167	0.940102	0.940102	1	13	0.00098269	9606	Homo sapiens	RGS19		R-HSA-392133	https://reactome.org/PathwayBrowser/#/R-HSA-418597
R-HSA-390466	Chaperonin-mediated protein folding	2	100	0.00679302	0.941014	0.941014	5	19	0.00143624	9606	Homo sapiens	GNAO1;TUBA1A		R-HSA-8850560;R-HSA-389970;R-HSA-389954;R-HSA-389980;R-HSA-389961	https://reactome.org/PathwayBrowser/#/R-HSA-390466
R-HSA-8986944	Transcriptional Regulation by MECP2	2	100	0.00679302	0.941014	0.941014	7	77	0.00582055	9606	Homo sapiens	SOX2;TNRC6B		R-HSA-9615554;R-HSA-9615570;R-HSA-9615571;R-HSA-9615536;R-HSA-9021183;R-HSA-9021182;R-HSA-9615501	https://reactome.org/PathwayBrowser/#/R-HSA-8986944
R-HSA-9012852	Signaling by NOTCH3	1	63	0.0042796	0.942767	0.942767	20	37	0.00279689	9606	Homo sapiens	MAML3		R-HSA-9021480;R-HSA-9021451;R-HSA-9021450;R-HSA-9018538;R-HSA-9021325;R-HSA-9016751;R-HSA-9018542;R-HSA-9013568;R-HSA-9021412;R-HSA-9021478;R-HSA-9016861;R-HSA-9014141;R-HSA-9013567;R-HSA-9013631;R-HSA-9021406;R-HSA-9014129;R-HSA-9013488;R-HSA-9016916;R-HSA-9013652;R-HSA-9017398	https://reactome.org/PathwayBrowser/#/R-HSA-9012852
R-HSA-975138	TRAF6 mediated induction of NFkB and MAP kinases upon TLR7/8 or 9 activation	2	101	0.00686095	0.943179	0.943179	6	48	0.00362839	9606	Homo sapiens	MAPK11;DYRK3		R-HSA-168053;R-HSA-450257;R-HSA-450222;R-HSA-450333;R-HSA-198669;R-HSA-199917	https://reactome.org/PathwayBrowser/#/R-HSA-975138
R-HSA-381070	IRE1alpha activates chaperones	2	101	0.00686095	0.943179	0.943179	1	53	0.00400635	9606	Homo sapiens	PLA2G4B		R-HSA-1791071	https://reactome.org/PathwayBrowser/#/R-HSA-381070
R-HSA-168164	Toll Like Receptor 3 (TLR3) Cascade	2	102	0.00692888	0.945269	0.945269	6	61	0.00461108	9606	Homo sapiens	MAPK11;DYRK3		R-HSA-168053;R-HSA-450257;R-HSA-450222;R-HSA-450333;R-HSA-198669;R-HSA-199917	https://reactome.org/PathwayBrowser/#/R-HSA-168164
R-HSA-975155	MyD88 dependent cascade initiated on endosome	2	102	0.00692888	0.945269	0.945269	6	63	0.00476226	9606	Homo sapiens	MAPK11;DYRK3		R-HSA-168053;R-HSA-450257;R-HSA-450222;R-HSA-450333;R-HSA-198669;R-HSA-199917	https://reactome.org/PathwayBrowser/#/R-HSA-975155
R-HSA-73894	DNA Repair	11	369	0.0250662	0.946204	0.946204	69	332	0.0250964	9606	Homo sapiens	HIST1H2BO;HIST1H4B;HERC2;EME2;HIST4H4;UVSSA;HIST1H4H;HIST1H2BG;CLSPN;HIST1H4C;HIST1H2BD;HIST1H4E;PLEC		R-HSA-5684052;R-HSA-69891;R-HSA-5686483;R-HSA-9684118;R-HSA-5683930;R-HSA-5683801;R-HSA-6782069;R-HSA-5682629;R-HSA-5686469;R-HSA-5685838;R-HSA-9629195;R-HSA-5683405;R-HSA-6782204;R-HSA-5686475;R-HSA-5686900;R-HSA-6785732;R-HSA-6785986;R-HSA-5693566;R-HSA-5683967;R-HSA-5683964;R-HSA-9629497;R-HSA-9629372;R-HSA-9629373;R-HSA-5684071;R-HSA-9629216;R-HSA-5693539;R-HSA-5693536;R-HSA-5683425;R-HSA-569…	https://reactome.org/PathwayBrowser/#/R-HSA-73894
R-HSA-5621480	Dectin-2 family	1	65	0.00441546	0.947746	0.947746	1	12	0.000907098	9606	Homo sapiens	MUC2		R-HSA-8858500	https://reactome.org/PathwayBrowser/#/R-HSA-5621480
R-HSA-168181	Toll Like Receptor 7/8 (TLR7/8) Cascade	2	104	0.00706474	0.94923	0.94923	6	66	0.00498904	9606	Homo sapiens	MAPK11;DYRK3		R-HSA-168053;R-HSA-450257;R-HSA-450222;R-HSA-450333;R-HSA-198669;R-HSA-199917	https://reactome.org/PathwayBrowser/#/R-HSA-168181
R-HSA-6782210	Gap-filling DNA repair synthesis and ligation in TC-NER	1	66	0.00448339	0.950071	0.950071	2	2	0.000151183	9606	Homo sapiens	UVSSA		R-HSA-6782227;R-HSA-6782208	https://reactome.org/PathwayBrowser/#/R-HSA-6782210
R-HSA-9029569	NR1H3 & NR1H2 regulate gene expression linked to cholesterol transport and efflux	1	66	0.00448339	0.950071	0.950071	8	40	0.00302366	9606	Homo sapiens	TNRC6B		R-HSA-9618486;R-HSA-9618405;R-HSA-9038545;R-HSA-9618392;R-HSA-9657791;R-HSA-9618479;R-HSA-9605052;R-HSA-9624925	https://reactome.org/PathwayBrowser/#/R-HSA-9029569
R-HSA-5674135	MAP2K and MAPK activation	1	66	0.00448339	0.950071	0.950071	2	12	0.000907098	9606	Homo sapiens	IL17RD		R-HSA-5674373;R-HSA-5674366	https://reactome.org/PathwayBrowser/#/R-HSA-5674135
R-HSA-1433557	Signaling by SCF-KIT	1	66	0.00448339	0.950071	0.950071	1	39	0.00294807	9606	Homo sapiens	GRB10		R-HSA-1433501	https://reactome.org/PathwayBrowser/#/R-HSA-1433557
R-HSA-3781865	Diseases of glycosylation	5	202	0.0137219	0.951063	0.951063	16	77	0.00582055	9606	Homo sapiens	MUC2;SDC3;CHST14;ADAMTS9;ADAMTS7		R-HSA-3636919;R-HSA-9036289;R-HSA-3656254;R-HSA-9036290;R-HSA-4420365;R-HSA-3560804;R-HSA-9036283;R-HSA-3656261;R-HSA-6785524;R-HSA-3560802;R-HSA-9036285;R-HSA-5096537;R-HSA-3656257;R-HSA-5096532;R-HSA-6785565;R-HSA-3656267	https://reactome.org/PathwayBrowser/#/R-HSA-3781865
R-HSA-156590	Glutathione conjugation	1	67	0.00455132	0.952292	0.952292	1	14	0.00105828	9606	Homo sapiens	HOXC9		R-HSA-176054	https://reactome.org/PathwayBrowser/#/R-HSA-156590
R-HSA-391251	Protein folding	2	106	0.0072006	0.952917	0.952917	11	28	0.00211656	9606	Homo sapiens	GNAO1;TUBA1A		R-HSA-389972;R-HSA-389974;R-HSA-8850560;R-HSA-389970;R-HSA-389954;R-HSA-389980;R-HSA-389964;R-HSA-389961;R-HSA-389976;R-HSA-389963;R-HSA-389978	https://reactome.org/PathwayBrowser/#/R-HSA-391251
R-HSA-422356	Regulation of insulin secretion	2	106	0.0072006	0.952917	0.952917	6	34	0.00257011	9606	Homo sapiens	CACNB3;ITPR3		R-HSA-169683;R-HSA-169680;R-HSA-400046;R-HSA-381644;R-HSA-265645;R-HSA-265166	https://reactome.org/PathwayBrowser/#/R-HSA-422356
R-HSA-5687128	MAPK6/MAPK4 signaling	2	106	0.0072006	0.952917	0.952917	3	40	0.00302366	9606	Homo sapiens	FOXO3B;TNRC6B		R-HSA-5687103;R-HSA-5687101;R-HSA-5687113	https://reactome.org/PathwayBrowser/#/R-HSA-5687128
R-HSA-8953897	Cellular responses to external stimuli	24	718	0.0487739	0.953139	0.953139	43	261	0.0197294	9606	Homo sapiens	CDKN2B;SZT2;HIST1H2BO;CDKN2A;MAPK11;HIST1H4B;TUBA1A;GNL3L;HIST4H4;MT1F;GRB10;HIST1H1E;HIST1H4H;HIST1H2BG;HIST1H3B;HIST1H4C;HIST1H2BD;HIST1H4E;TNRC6B		R-HSA-9657619;R-HSA-182594;R-HSA-8979082;R-HSA-5662623;R-HSA-3209151;R-HSA-9640195;R-HSA-3229089;R-HSA-3223200;R-HSA-5662596;R-HSA-3785711;R-HSA-3240295;R-HSA-3239014;R-HSA-3239019;R-HSA-450333;R-HSA-9654792;R-HSA-9633742;R-HSA-3229102;R-HSA-6804998;R-HSA-9633008;R-HSA-3229138;R-HSA-6804996;R-HSA-9639287;R-HSA-3209109;R-HSA-3238999;R-HSA-3209111;R-HSA-3200023;R-HSA-450222;R-HSA-6804879;R-HSA-3209…	https://reactome.org/PathwayBrowser/#/R-HSA-8953897
R-HSA-453279	Mitotic G1 phase and G1/S transition	4	173	0.0117519	0.953656	0.953656	10	99	0.00748356	9606	Homo sapiens	CDKN2B;CCND2;CDKN2A		R-HSA-182594;R-HSA-8941915;R-HSA-8942607;R-HSA-9018017;R-HSA-69227;R-HSA-8942803;R-HSA-1226094;R-HSA-8942836;R-HSA-1226095;R-HSA-8941895	https://reactome.org/PathwayBrowser/#/R-HSA-453279
R-HSA-6782135	Dual incision in TC-NER	1	68	0.00461925	0.954415	0.954415	7	7	0.000529141	9606	Homo sapiens	UVSSA		R-HSA-6782211;R-HSA-6782131;R-HSA-9684118;R-HSA-6782224;R-HSA-6782141;R-HSA-6782204;R-HSA-6782138	https://reactome.org/PathwayBrowser/#/R-HSA-6782135
R-HSA-2894858	Signaling by NOTCH1 HD+PEST Domain Mutants in Cancer	1	68	0.00461925	0.954415	0.954415	11	21	0.00158742	9606	Homo sapiens	MAML3		R-HSA-4396402;R-HSA-4396401;R-HSA-2220979;R-HSA-2220981;R-HSA-2220964;R-HSA-2220966;R-HSA-2220985;R-HSA-2220971;R-HSA-4396393;R-HSA-4396392;R-HSA-2220957	https://reactome.org/PathwayBrowser/#/R-HSA-2894858
R-HSA-2644602	Signaling by NOTCH1 PEST Domain Mutants in Cancer	1	68	0.00461925	0.954415	0.954415	11	21	0.00158742	9606	Homo sapiens	MAML3		R-HSA-4396402;R-HSA-4396401;R-HSA-2220979;R-HSA-2220981;R-HSA-2220964;R-HSA-2220966;R-HSA-2220985;R-HSA-2220971;R-HSA-4396393;R-HSA-4396392;R-HSA-2220957	https://reactome.org/PathwayBrowser/#/R-HSA-2644602
R-HSA-2894862	Constitutive Signaling by NOTCH1 HD+PEST Domain Mutants	1	68	0.00461925	0.954415	0.954415	11	21	0.00158742	9606	Homo sapiens	MAML3		R-HSA-4396402;R-HSA-4396401;R-HSA-2220979;R-HSA-2220981;R-HSA-2220964;R-HSA-2220966;R-HSA-2220985;R-HSA-2220971;R-HSA-4396393;R-HSA-4396392;R-HSA-2220957	https://reactome.org/PathwayBrowser/#/R-HSA-2894862
R-HSA-2644606	Constitutive Signaling by NOTCH1 PEST Domain Mutants	1	68	0.00461925	0.954415	0.954415	11	21	0.00158742	9606	Homo sapiens	MAML3		R-HSA-4396402;R-HSA-4396401;R-HSA-2220979;R-HSA-2220981;R-HSA-2220964;R-HSA-2220966;R-HSA-2220985;R-HSA-2220971;R-HSA-4396393;R-HSA-4396392;R-HSA-2220957	https://reactome.org/PathwayBrowser/#/R-HSA-2644606
R-HSA-2644603	Signaling by NOTCH1 in Cancer	1	68	0.00461925	0.954415	0.954415	11	39	0.00294807	9606	Homo sapiens	MAML3		R-HSA-4396402;R-HSA-4396401;R-HSA-2220979;R-HSA-2220981;R-HSA-2220964;R-HSA-2220966;R-HSA-2220985;R-HSA-2220971;R-HSA-4396393;R-HSA-4396392;R-HSA-2220957	https://reactome.org/PathwayBrowser/#/R-HSA-2644603
R-HSA-6811434	COPI-dependent Golgi-to-ER retrograde traffic	2	107	0.00726853	0.954664	0.954664	2	11	0.000831507	9606	Homo sapiens	TUBA1A;KIF1C		R-HSA-6811426;R-HSA-6811423	https://reactome.org/PathwayBrowser/#/R-HSA-6811434
R-HSA-937061	TRIF(TICAM1)-mediated TLR4 signaling	2	107	0.00726853	0.954664	0.954664	6	58	0.00438431	9606	Homo sapiens	MAPK11;DYRK3		R-HSA-168053;R-HSA-450257;R-HSA-450222;R-HSA-450333;R-HSA-198669;R-HSA-199917	https://reactome.org/PathwayBrowser/#/R-HSA-937061
R-HSA-166166	MyD88-independent TLR4 cascade	2	107	0.00726853	0.954664	0.954664	6	60	0.00453549	9606	Homo sapiens	MAPK11;DYRK3		R-HSA-168053;R-HSA-450257;R-HSA-450222;R-HSA-450333;R-HSA-198669;R-HSA-199917	https://reactome.org/PathwayBrowser/#/R-HSA-166166
R-HSA-168138	Toll Like Receptor 9 (TLR9) Cascade	2	107	0.00726853	0.954664	0.954664	6	68	0.00514022	9606	Homo sapiens	MAPK11;DYRK3		R-HSA-168053;R-HSA-450257;R-HSA-450222;R-HSA-450333;R-HSA-198669;R-HSA-199917	https://reactome.org/PathwayBrowser/#/R-HSA-168138
R-HSA-381340	Transcriptional regulation of white adipocyte differentiation	2	108	0.00733646	0.956348	0.956348	10	18	0.00136065	9606	Homo sapiens	HELZ2;WNT10B		R-HSA-1183058;R-HSA-560472;R-HSA-560473;R-HSA-560491;R-HSA-560493;R-HSA-560510;R-HSA-381309;R-HSA-1183003;R-HSA-560498;R-HSA-560517	https://reactome.org/PathwayBrowser/#/R-HSA-381340
R-HSA-5578775	Ion homeostasis	1	69	0.00468718	0.956444	0.956444	3	16	0.00120946	9606	Homo sapiens	ITPR3		R-HSA-169683;R-HSA-5226904;R-HSA-139854	https://reactome.org/PathwayBrowser/#/R-HSA-5578775
R-HSA-180786	Extension of Telomeres	1	69	0.00468718	0.956444	0.956444	5	28	0.00211656	9606	Homo sapiens	L1CAM		R-HSA-174439;R-HSA-9668902;R-HSA-174452;R-HSA-9668904;R-HSA-174447	https://reactome.org/PathwayBrowser/#/R-HSA-180786
R-HSA-1660499	Synthesis of PIPs at the plasma membrane	1	69	0.00468718	0.956444	0.956444	5	33	0.00249452	9606	Homo sapiens	AKAP12		R-HSA-1675773;R-HSA-1676145;R-HSA-1676082;R-HSA-1675810;R-HSA-1676134	https://reactome.org/PathwayBrowser/#/R-HSA-1660499
R-HSA-6784531	tRNA processing in the nucleus	1	70	0.00475511	0.958382	0.958382	1	7	0.000529141	9606	Homo sapiens	RPPH1		R-HSA-5696810	https://reactome.org/PathwayBrowser/#/R-HSA-6784531
R-HSA-8943724	Regulation of PTEN gene transcription	1	70	0.00475511	0.958382	0.958382	2	15	0.00113387	9606	Homo sapiens	EGR1		R-HSA-8944104;R-HSA-8944078	https://reactome.org/PathwayBrowser/#/R-HSA-8943724
R-HSA-2426168	Activation of gene expression by SREBF (SREBP)	1	70	0.00475511	0.958382	0.958382	3	42	0.00317484	9606	Homo sapiens	HELZ2		R-HSA-1655848;R-HSA-1655850;R-HSA-1655826	https://reactome.org/PathwayBrowser/#/R-HSA-2426168
R-HSA-69563	p53-Dependent G1 DNA Damage Response	1	70	0.00475511	0.958382	0.958382	1	22	0.00166301	9606	Homo sapiens	CDKN2A		R-HSA-6804879	https://reactome.org/PathwayBrowser/#/R-HSA-69563
R-HSA-69580	p53-Dependent G1/S DNA damage checkpoint	1	70	0.00475511	0.958382	0.958382	1	22	0.00166301	9606	Homo sapiens	CDKN2A		R-HSA-6804879	https://reactome.org/PathwayBrowser/#/R-HSA-69580
R-HSA-2262752	Cellular responses to stress	23	700	0.0475511	0.958727	0.958727	41	230	0.017386	9606	Homo sapiens	CDKN2B;SZT2;HIST1H2BO;CDKN2A;MAPK11;HIST1H4B;TUBA1A;GNL3L;HIST4H4;GRB10;HIST1H1E;HIST1H4H;HIST1H2BG;HIST1H3B;HIST1H4C;HIST1H2BD;HIST1H4E;TNRC6B		R-HSA-9657619;R-HSA-182594;R-HSA-8979082;R-HSA-3209151;R-HSA-9640195;R-HSA-3229089;R-HSA-3223200;R-HSA-3785711;R-HSA-3240295;R-HSA-3239014;R-HSA-3239019;R-HSA-450333;R-HSA-9654792;R-HSA-9633742;R-HSA-3229102;R-HSA-6804998;R-HSA-9633008;R-HSA-3229138;R-HSA-6804996;R-HSA-9639287;R-HSA-3209109;R-HSA-3238999;R-HSA-3209111;R-HSA-3200023;R-HSA-450222;R-HSA-6804879;R-HSA-3209114;R-HSA-4647594;R-HSA-9640…	https://reactome.org/PathwayBrowser/#/R-HSA-2262752
R-HSA-6790901	rRNA modification in the nucleus and cytosol	1	71	0.00482304	0.960234	0.960234	1	8	0.000604732	9606	Homo sapiens	SNORD3A		R-HSA-6790906	https://reactome.org/PathwayBrowser/#/R-HSA-6790901
R-HSA-166058	MyD88:MAL(TIRAP) cascade initiated on plasma membrane	2	111	0.00754025	0.961049	0.961049	6	64	0.00483786	9606	Homo sapiens	MAPK11;DYRK3		R-HSA-168053;R-HSA-450257;R-HSA-450222;R-HSA-450333;R-HSA-198669;R-HSA-199917	https://reactome.org/PathwayBrowser/#/R-HSA-166058
R-HSA-168188	Toll Like Receptor TLR6:TLR2 Cascade	2	111	0.00754025	0.961049	0.961049	6	66	0.00498904	9606	Homo sapiens	MAPK11;DYRK3		R-HSA-168053;R-HSA-450257;R-HSA-450222;R-HSA-450333;R-HSA-198669;R-HSA-199917	https://reactome.org/PathwayBrowser/#/R-HSA-168188
R-HSA-1169091	Activation of NF-kappaB in B cells	1	72	0.00489097	0.962004	0.962004	4	10	0.000755915	9606	Homo sapiens	CARD11		R-HSA-1168641;R-HSA-1168644;R-HSA-1168635;R-HSA-1168637	https://reactome.org/PathwayBrowser/#/R-HSA-1169091
R-HSA-74751	Insulin receptor signalling cascade	1	72	0.00489097	0.962004	0.962004	3	25	0.00188979	9606	Homo sapiens	GRB10		R-HSA-74707;R-HSA-74740;R-HSA-110011	https://reactome.org/PathwayBrowser/#/R-HSA-74751
R-HSA-5362517	Signaling by Retinoic Acid	1	72	0.00489097	0.962004	0.962004	1	21	0.00158742	9606	Homo sapiens	CYP26B1		R-HSA-5362525	https://reactome.org/PathwayBrowser/#/R-HSA-5362517
R-HSA-69615	G1/S DNA Damage Checkpoints	1	72	0.00489097	0.962004	0.962004	1	26	0.00196538	9606	Homo sapiens	CDKN2A		R-HSA-6804879	https://reactome.org/PathwayBrowser/#/R-HSA-69615
R-HSA-68877	Mitotic Prometaphase	5	211	0.0143333	0.962218	0.962218	9	20	0.00151183	9606	Homo sapiens	TUBA1A;NUMA1;CEP164;CEP250;PCNT		R-HSA-9648114;R-HSA-9648017;R-HSA-2484822;R-HSA-375302;R-HSA-380316;R-HSA-380508;R-HSA-1638803;R-HSA-2468287;R-HSA-1638821	https://reactome.org/PathwayBrowser/#/R-HSA-68877
R-HSA-111885	Opioid Signalling	2	112	0.00760818	0.962505	0.962505	11	59	0.0044599	9606	Homo sapiens	GNAO1;ITPR3		R-HSA-169683;R-HSA-169680;R-HSA-167408;R-HSA-112037;R-HSA-167415;R-HSA-111879;R-HSA-167429;R-HSA-167419;R-HSA-167433;R-HSA-112271;R-HSA-111870	https://reactome.org/PathwayBrowser/#/R-HSA-111885
R-HSA-913709	O-linked glycosylation of mucins	1	73	0.0049589	0.963696	0.963696	17	17	0.00128506	9606	Homo sapiens	MUC2		R-HSA-5694487;R-HSA-977071;R-HSA-977228;R-HSA-1964505;R-HSA-913675;R-HSA-1964501;R-HSA-914017;R-HSA-914018;R-HSA-914012;R-HSA-914008;R-HSA-914010;R-HSA-981497;R-HSA-914005;R-HSA-981814;R-HSA-914006;R-HSA-6786012;R-HSA-981809	https://reactome.org/PathwayBrowser/#/R-HSA-913709
R-HSA-5663220	RHO GTPases Activate Formins	3	149	0.0101216	0.964921	0.964921	8	27	0.00204097	9606	Homo sapiens	FMNL3;FMNL1;TUBA1A		R-HSA-5665686;R-HSA-5665767;R-HSA-5663232;R-HSA-5665809;R-HSA-5665761;R-HSA-5665802;R-HSA-5665659;R-HSA-5666169	https://reactome.org/PathwayBrowser/#/R-HSA-5663220
R-HSA-168179	Toll Like Receptor TLR1:TLR2 Cascade	2	114	0.00774404	0.965262	0.965262	6	66	0.00498904	9606	Homo sapiens	MAPK11;DYRK3		R-HSA-168053;R-HSA-450257;R-HSA-450222;R-HSA-450333;R-HSA-198669;R-HSA-199917	https://reactome.org/PathwayBrowser/#/R-HSA-168179
R-HSA-181438	Toll Like Receptor 2 (TLR2) Cascade	2	114	0.00774404	0.965262	0.965262	6	68	0.00514022	9606	Homo sapiens	MAPK11;DYRK3		R-HSA-168053;R-HSA-450257;R-HSA-450222;R-HSA-450333;R-HSA-198669;R-HSA-199917	https://reactome.org/PathwayBrowser/#/R-HSA-181438
R-HSA-3108232	SUMO E3 ligases SUMOylate target proteins	4	183	0.0124312	0.966028	0.966028	6	131	0.00990249	9606	Homo sapiens	HIST1H4B;HERC2;CDKN2A;HIST4H4;HIST1H4H;HIST1H4C;HIC1;HIST1H4E		R-HSA-4570485;R-HSA-4570496;R-HSA-2997706;R-HSA-4090281;R-HSA-4551724;R-HSA-4568846	https://reactome.org/PathwayBrowser/#/R-HSA-3108232
R-HSA-204005	COPII-mediated vesicle transport	1	77	0.00523062	0.969742	0.969742	10	16	0.00120946	9606	Homo sapiens	COL7A1		R-HSA-5694439;R-HSA-5694418;R-HSA-203973;R-HSA-5694417;R-HSA-5694446;R-HSA-5694527;R-HSA-204008;R-HSA-5694522;R-HSA-5694441;R-HSA-5694409	https://reactome.org/PathwayBrowser/#/R-HSA-204005
R-HSA-948021	Transport to the Golgi and subsequent modification	5	219	0.0148767	0.970122	0.970122	22	60	0.00453549	9606	Homo sapiens	SPTBN5;TUBA1A;COL7A1;MAN1C1;SPTBN2		R-HSA-6807877;R-HSA-6807875;R-HSA-5694418;R-HSA-203973;R-HSA-5694417;R-HSA-6809006;R-HSA-5694527;R-HSA-204008;R-HSA-6809003;R-HSA-5694522;R-HSA-5694427;R-HSA-964737;R-HSA-964830;R-HSA-5694439;R-HSA-5694436;R-HSA-6809011;R-HSA-6809010;R-HSA-5694435;R-HSA-964825;R-HSA-5694446;R-HSA-5694441;R-HSA-5694409	https://reactome.org/PathwayBrowser/#/R-HSA-948021
R-HSA-109581	Apoptosis	4	189	0.0128388	0.971898	0.971898	6	141	0.0106584	9606	Homo sapiens	CDKN2A;HIST1H1E;CLSPN;PLEC		R-HSA-211239;R-HSA-351936;R-HSA-201637;R-HSA-211247;R-HSA-9645694;R-HSA-9645692	https://reactome.org/PathwayBrowser/#/R-HSA-109581
R-HSA-975634	Retinoid metabolism and transport	1	79	0.00536648	0.972376	0.972376	3	28	0.00211656	9606	Homo sapiens	SDC3		R-HSA-2404131;R-HSA-2423785;R-HSA-2429643	https://reactome.org/PathwayBrowser/#/R-HSA-975634
R-HSA-5607764	CLEC7A (Dectin-1) signaling	2	120	0.00815162	0.972413	0.972413	3	45	0.00340162	9606	Homo sapiens	ITPR3;CARD11		R-HSA-169683;R-HSA-169680;R-HSA-202534	https://reactome.org/PathwayBrowser/#/R-HSA-5607764
R-HSA-3371497	HSP90 chaperone cycle for steroid hormone receptors (SHR)	1	80	0.00543441	0.973607	0.973607	1	15	0.00113387	9606	Homo sapiens	TUBA1A		R-HSA-5618080	https://reactome.org/PathwayBrowser/#/R-HSA-3371497
R-HSA-909733	Interferon alpha/beta signaling	4	191	0.0129747	0.973634	0.973634	2	22	0.00166301	9606	Homo sapiens	EGR1;IFIT1		R-HSA-1015702;R-HSA-1015699	https://reactome.org/PathwayBrowser/#/R-HSA-909733
R-HSA-2990846	SUMOylation	4	192	0.0130426	0.974464	0.974464	6	140	0.0105828	9606	Homo sapiens	HIST1H4B;HERC2;CDKN2A;HIST4H4;HIST1H4H;HIST1H4C;HIC1;HIST1H4E		R-HSA-4570485;R-HSA-4570496;R-HSA-2997706;R-HSA-4090281;R-HSA-4551724;R-HSA-4568846	https://reactome.org/PathwayBrowser/#/R-HSA-2990846
R-HSA-382556	ABC-family proteins mediated transport	2	122	0.00828748	0.974464	0.974464	2	27	0.00204097	9606	Homo sapiens	ABCA3		R-HSA-5683714;R-HSA-1467466	https://reactome.org/PathwayBrowser/#/R-HSA-382556
R-HSA-418346	Platelet homeostasis	2	123	0.00835541	0.975434	0.975434	5	30	0.00226775	9606	Homo sapiens	PTGIR;ITPR3		R-HSA-392852;R-HSA-392870;R-HSA-391942;R-HSA-139854;R-HSA-392874	https://reactome.org/PathwayBrowser/#/R-HSA-418346
R-HSA-983231	Factors involved in megakaryocyte development and platelet production	4	194	0.0131785	0.97605	0.97605	5	43	0.00325043	9606	Homo sapiens	TUBA1A;MICAL1;KIF1C;HIST1H3B		R-HSA-997263;R-HSA-8865107;R-HSA-983259;R-HSA-994106;R-HSA-983266	https://reactome.org/PathwayBrowser/#/R-HSA-983231
R-HSA-8852276	The role of GTSE1 in G2/M progression after G2 checkpoint	1	83	0.0056382	0.976978	0.976978	3	10	0.000755915	9606	Homo sapiens	TUBA1A		R-HSA-8852306;R-HSA-8852298;R-HSA-8852280	https://reactome.org/PathwayBrowser/#/R-HSA-8852276
R-HSA-1169408	ISG15 antiviral mechanism	1	83	0.0056382	0.976978	0.976978	2	16	0.00120946	9606	Homo sapiens	IFIT1		R-HSA-1678841;R-HSA-1169406	https://reactome.org/PathwayBrowser/#/R-HSA-1169408
R-HSA-5633008	TP53 Regulates Transcription of Cell Death Genes	1	83	0.0056382	0.976978	0.976978	3	68	0.00514022	9606	Homo sapiens	LRRC49		R-HSA-6801109;R-HSA-6801089;R-HSA-6801101	https://reactome.org/PathwayBrowser/#/R-HSA-5633008
R-HSA-1980143	Signaling by NOTCH1	1	84	0.00570613	0.978004	0.978004	11	39	0.00294807	9606	Homo sapiens	MAML3		R-HSA-4396371;R-HSA-1980078;R-HSA-1980047;R-HSA-1912393;R-HSA-1912394;R-HSA-4396347;R-HSA-4396379;R-HSA-1912391;R-HSA-1980067;R-HSA-4396382;R-HSA-1980065	https://reactome.org/PathwayBrowser/#/R-HSA-1980143
R-HSA-1660661	Sphingolipid de novo biosynthesis	1	84	0.00570613	0.978004	0.978004	1	32	0.00241893	9606	Homo sapiens	PRKD1		R-HSA-429698	https://reactome.org/PathwayBrowser/#/R-HSA-1660661
R-HSA-1592230	Mitochondrial biogenesis	2	127	0.00862713	0.978968	0.978968	2	36	0.00272129	9606	Homo sapiens	HELZ2;MAPK11		R-HSA-1592233;R-HSA-1592238	https://reactome.org/PathwayBrowser/#/R-HSA-1592230
R-HSA-6781827	Transcription-Coupled Nucleotide Excision Repair (TC-NER)	1	85	0.00577406	0.978984	0.978984	12	17	0.00128506	9606	Homo sapiens	UVSSA		R-HSA-6782069;R-HSA-6782004;R-HSA-6782211;R-HSA-6782131;R-HSA-6782227;R-HSA-9684118;R-HSA-6782224;R-HSA-6782208;R-HSA-6782141;R-HSA-6782204;R-HSA-6782138;R-HSA-6782234	https://reactome.org/PathwayBrowser/#/R-HSA-6781827
R-HSA-9024446	NR1H2 and NR1H3-mediated signaling	1	85	0.00577406	0.978984	0.978984	8	60	0.00453549	9606	Homo sapiens	TNRC6B		R-HSA-9618486;R-HSA-9618405;R-HSA-9038545;R-HSA-9618392;R-HSA-9657791;R-HSA-9618479;R-HSA-9605052;R-HSA-9624925	https://reactome.org/PathwayBrowser/#/R-HSA-9024446
R-HSA-1655829	Regulation of cholesterol biosynthesis by SREBP (SREBF)	1	86	0.00584199	0.97992	0.97992	3	52	0.00393076	9606	Homo sapiens	HELZ2		R-HSA-1655848;R-HSA-1655850;R-HSA-1655826	https://reactome.org/PathwayBrowser/#/R-HSA-1655829
R-HSA-9006931	Signaling by Nuclear Receptors	10	385	0.0261531	0.98049	0.98049	30	191	0.014438	9606	Homo sapiens	CYP26B1;HIST1H2BO;HIST1H4B;HIST4H4;HIST1H4H;FOXO3B;HIST1H2BG;HIST1H3B;HIST1H4C;HIST1H2BD;HIST1H4E;TNRC6B		R-HSA-9011981;R-HSA-9011983;R-HSA-9618392;R-HSA-5362525;R-HSA-9011975;R-HSA-9624925;R-HSA-9009371;R-HSA-9012186;R-HSA-9011985;R-HSA-9038545;R-HSA-9011984;R-HSA-9624526;R-HSA-9009065;R-HSA-9012203;R-HSA-9011949;R-HSA-9618486;R-HSA-9011950;R-HSA-9012000;R-HSA-9009378;R-HSA-9011941;R-HSA-9657791;R-HSA-9012196;R-HSA-9605052;R-HSA-9011961;R-HSA-9011966;R-HSA-9618405;R-HSA-9011952;R-HSA-9012208;R-HSA-9…	https://reactome.org/PathwayBrowser/#/R-HSA-9006931
R-HSA-3858494	Beta-catenin independent WNT signaling	3	166	0.0112764	0.980548	0.980548	7	51	0.00385517	9606	Homo sapiens	GNAO1;ITPR3;TNRC6B		R-HSA-169680;R-HSA-4420052;R-HSA-3965444;R-HSA-3965447;R-HSA-4518575;R-HSA-3965441;R-HSA-4518585	https://reactome.org/PathwayBrowser/#/R-HSA-3858494
R-HSA-2151201	Transcriptional activation of mitochondrial biogenesis	1	87	0.00590992	0.980815	0.980815	1	32	0.00241893	9606	Homo sapiens	HELZ2		R-HSA-1592238	https://reactome.org/PathwayBrowser/#/R-HSA-2151201
R-HSA-5579029	Metabolic disorders of biological oxidation enzymes	1	88	0.00597785	0.98167	0.98167	1	39	0.00294807	9606	Homo sapiens	CYP26B1		R-HSA-5602063	https://reactome.org/PathwayBrowser/#/R-HSA-5579029
R-HSA-2187338	Visual phototransduction	3	169	0.0114802	0.982502	0.982502	7	92	0.00695442	9606	Homo sapiens	RGS9BP;ABCA3;SDC3		R-HSA-2584246;R-HSA-74615;R-HSA-2404131;R-HSA-2466749;R-HSA-1467466;R-HSA-2423785;R-HSA-2429643	https://reactome.org/PathwayBrowser/#/R-HSA-2187338
R-HSA-1852241	Organelle biogenesis and maintenance	8	335	0.0227566	0.984633	0.984633	20	86	0.00650087	9606	Homo sapiens	HELZ2;MAPK11;TUBA1A;FBF1;CEP164;CEP250;PCNT;SSTR3		R-HSA-5624949;R-HSA-5626228;R-HSA-5625424;R-HSA-5626227;R-HSA-5625426;R-HSA-5624127;R-HSA-5624126;R-HSA-5626681;R-HSA-5617816;R-HSA-5624952;R-HSA-5618328;R-HSA-5618331;R-HSA-5638009;R-HSA-1592233;R-HSA-1592238;R-HSA-5625421;R-HSA-5626220;R-HSA-5626223;R-HSA-5625416;R-HSA-5626699	https://reactome.org/PathwayBrowser/#/R-HSA-1852241
R-HSA-9013694	Signaling by NOTCH4	1	92	0.00624958	0.984725	0.984725	8	20	0.00151183	9606	Homo sapiens	MAML3		R-HSA-9604451;R-HSA-9604550;R-HSA-9013693;R-HSA-9604471;R-HSA-9013711;R-HSA-9604664;R-HSA-9604553;R-HSA-9604446	https://reactome.org/PathwayBrowser/#/R-HSA-9013694
R-HSA-1168372	Downstream signaling events of B Cell Receptor (BCR)	1	93	0.00631751	0.985406	0.985406	4	15	0.00113387	9606	Homo sapiens	CARD11		R-HSA-1168641;R-HSA-1168644;R-HSA-1168635;R-HSA-1168637	https://reactome.org/PathwayBrowser/#/R-HSA-1168372
R-HSA-450531	Regulation of mRNA stability by proteins that bind AU-rich elements	1	93	0.00631751	0.985406	0.985406	1	26	0.00196538	9606	Homo sapiens	MAPK11		R-HSA-451152	https://reactome.org/PathwayBrowser/#/R-HSA-450531
R-HSA-69278	Cell Cycle, Mitotic	17	596	0.0404864	0.985588	0.985588	50	350	0.026457	9606	Homo sapiens	CDKN2B;HIST1H2BO;NUMA1;CDKN2A;PLEKHG5;CEP164;HIST1H4B;TUBA1A;CCND2;HIST4H4;HIST1H4H;CEP250;HIST1H2BG;HIST1H3B;HIST1H4C;PCNT;HIST1H2BD;HIST1H4E		R-HSA-9648017;R-HSA-380294;R-HSA-375302;R-HSA-8942607;R-HSA-380303;R-HSA-1638803;R-HSA-2294574;R-HSA-380311;R-HSA-2294580;R-HSA-380316;R-HSA-8853405;R-HSA-2468287;R-HSA-2294590;R-HSA-380455;R-HSA-9668405;R-HSA-2172678;R-HSA-9018017;R-HSA-9668415;R-HSA-8853419;R-HSA-9668389;R-HSA-2301205;R-HSA-9668395;R-HSA-1638821;R-HSA-8852280;R-HSA-2245218;R-HSA-182594;R-HSA-2288097;R-HSA-2467809;R-HSA-2467811;…	https://reactome.org/PathwayBrowser/#/R-HSA-69278
R-HSA-6807505	RNA polymerase II transcribes snRNA genes	1	94	0.00638544	0.986057	0.986057	11	11	0.000831507	9606	Homo sapiens	RNU4-1		R-HSA-6814885;R-HSA-6814549;R-HSA-6814559;R-HSA-6810239;R-HSA-6810238;R-HSA-6814555;R-HSA-6810235;R-HSA-6814554;R-HSA-6810234;R-HSA-6810233;R-HSA-6807496	https://reactome.org/PathwayBrowser/#/R-HSA-6807505
R-HSA-446728	Cell junction organization	1	94	0.00638544	0.986057	0.986057	6	37	0.00279689	9606	Homo sapiens	PLEC		R-HSA-446083;R-HSA-432956;R-HSA-446077;R-HSA-432909;R-HSA-432952;R-HSA-446089	https://reactome.org/PathwayBrowser/#/R-HSA-446728
R-HSA-6806667	Metabolism of fat-soluble vitamins	1	94	0.00638544	0.986057	0.986057	3	34	0.00257011	9606	Homo sapiens	SDC3		R-HSA-2404131;R-HSA-2423785;R-HSA-2429643	https://reactome.org/PathwayBrowser/#/R-HSA-6806667
R-HSA-1169410	Antiviral mechanism by IFN-stimulated genes	1	94	0.00638544	0.986057	0.986057	2	31	0.00234334	9606	Homo sapiens	IFIT1		R-HSA-1678841;R-HSA-1169406	https://reactome.org/PathwayBrowser/#/R-HSA-1169410
R-HSA-8876198	RAB GEFs exchange GTP for GDP on RABs	1	94	0.00638544	0.986057	0.986057	1	21	0.00158742	9606	Homo sapiens	RAB6B		R-HSA-8876193	https://reactome.org/PathwayBrowser/#/R-HSA-8876198
R-HSA-1614635	Sulfur amino acid metabolism	1	94	0.00638544	0.986057	0.986057	1	37	0.00279689	9606	Homo sapiens	ZFHX2		R-HSA-6814165	https://reactome.org/PathwayBrowser/#/R-HSA-1614635
R-HSA-1640170	Cell Cycle	22	734	0.0498607	0.98614	0.98614	76	449	0.0339406	9606	Homo sapiens	CDKN2B;HIST1H2BO;NUMA1;CDKN2A;PLEKHG5;CEP164;L1CAM;SYNE2;HIST1H4B;HERC2;TUBA1A;CCND2;HIST4H4;HIST1H4H;CEP250;HIST1H2BG;CLSPN;HIST1H3B;HIST1H4C;PCNT;HIST1H2BD;HIST1H4E		R-HSA-69891;R-HSA-9648017;R-HSA-380294;R-HSA-375302;R-HSA-8942607;R-HSA-380303;R-HSA-1638803;R-HSA-2294574;R-HSA-380311;R-HSA-912408;R-HSA-9670149;R-HSA-2294580;R-HSA-380316;R-HSA-8853405;R-HSA-2468287;R-HSA-2294590;R-HSA-380455;R-HSA-9668405;R-HSA-2172678;R-HSA-176298;R-HSA-9018017;R-HSA-9668415;R-HSA-8853419;R-HSA-9668902;R-HSA-9668389;R-HSA-2301205;R-HSA-9668395;R-HSA-9668904;R-HSA-176318;R-HS…	https://reactome.org/PathwayBrowser/#/R-HSA-1640170
R-HSA-69275	G2/M Transition	4	212	0.0144012	0.9867	0.9867	15	78	0.00589614	9606	Homo sapiens	TUBA1A;CEP164;CEP250;PCNT		R-HSA-380455;R-HSA-380294;R-HSA-380303;R-HSA-8853419;R-HSA-8852298;R-HSA-3000319;R-HSA-380311;R-HSA-380272;R-HSA-8852306;R-HSA-8853405;R-HSA-2574845;R-HSA-3000310;R-HSA-380283;R-HSA-2574840;R-HSA-8852280	https://reactome.org/PathwayBrowser/#/R-HSA-69275
R-HSA-438064	Post NMDA receptor activation events	1	96	0.0065213	0.987272	0.987272	1	39	0.00294807	9606	Homo sapiens	TUBA1A		R-HSA-9619542	https://reactome.org/PathwayBrowser/#/R-HSA-438064
R-HSA-5633007	Regulation of TP53 Activity	3	178	0.0120916	0.987301	0.987301	6	98	0.00740797	9606	Homo sapiens	MAPK11;DYRK3;CDKN2A		R-HSA-6804998;R-HSA-6798374;R-HSA-6804996;R-HSA-6798372;R-HSA-3239014;R-HSA-6804879	https://reactome.org/PathwayBrowser/#/R-HSA-5633007
R-HSA-453274	Mitotic G2-G2/M phases	4	214	0.0145371	0.987556	0.987556	15	80	0.00604732	9606	Homo sapiens	TUBA1A;CEP164;CEP250;PCNT		R-HSA-380455;R-HSA-380294;R-HSA-380303;R-HSA-8853419;R-HSA-8852298;R-HSA-3000319;R-HSA-380311;R-HSA-380272;R-HSA-8852306;R-HSA-8853405;R-HSA-2574845;R-HSA-3000310;R-HSA-380283;R-HSA-2574840;R-HSA-8852280	https://reactome.org/PathwayBrowser/#/R-HSA-453274
R-HSA-156902	Peptide chain elongation	1	97	0.00658923	0.987839	0.987839	4	5	0.000377958	9606	Homo sapiens	GNL3L		R-HSA-156915;R-HSA-156912;R-HSA-156923;R-HSA-156907	https://reactome.org/PathwayBrowser/#/R-HSA-156902
R-HSA-74752	Signaling by Insulin receptor	1	97	0.00658923	0.987839	0.987839	3	34	0.00257011	9606	Homo sapiens	GRB10		R-HSA-74707;R-HSA-74740;R-HSA-110011	https://reactome.org/PathwayBrowser/#/R-HSA-74752
R-HSA-71406	Pyruvate metabolism and Citric Acid (TCA) cycle	1	98	0.00665716	0.988382	0.988382	1	36	0.00272129	9606	Homo sapiens	HOXC9		R-HSA-9011595	https://reactome.org/PathwayBrowser/#/R-HSA-71406
R-HSA-5576891	Cardiac conduction	2	143	0.00971401	0.988783	0.988783	4	27	0.00204097	9606	Homo sapiens	ITPR3;KCNK3		R-HSA-169683;R-HSA-5226904;R-HSA-5578910;R-HSA-139854	https://reactome.org/PathwayBrowser/#/R-HSA-5576891
R-HSA-5619084	ABC transporter disorders	1	99	0.00672509	0.9889	0.9889	1	22	0.00166301	9606	Homo sapiens	ABCA3		R-HSA-5683672	https://reactome.org/PathwayBrowser/#/R-HSA-5619084
R-HSA-1630316	Glycosaminoglycan metabolism	3	182	0.0123633	0.989002	0.989002	24	88	0.00665205	9606	Homo sapiens	SDC3;IDS;CHST14		R-HSA-2076383;R-HSA-1889981;R-HSA-9638064;R-HSA-2076508;R-HSA-1678650;R-HSA-1667005;R-HSA-1793182;R-HSA-1889978;R-HSA-2024084;R-HSA-2076371;R-HSA-1878002;R-HSA-2022063;R-HSA-2024108;R-HSA-2022860;R-HSA-2022856;R-HSA-2076392;R-HSA-2022887;R-HSA-2022919;R-HSA-2024100;R-HSA-2076419;R-HSA-2076611;R-HSA-2022851;R-HSA-1889955;R-HSA-1678694	https://reactome.org/PathwayBrowser/#/R-HSA-1630316
R-HSA-5357801	Programmed Cell Death	4	218	0.0148088	0.989112	0.989112	6	175	0.0132285	9606	Homo sapiens	CDKN2A;HIST1H1E;CLSPN;PLEC		R-HSA-211239;R-HSA-351936;R-HSA-201637;R-HSA-211247;R-HSA-9645694;R-HSA-9645692	https://reactome.org/PathwayBrowser/#/R-HSA-5357801
R-HSA-166016	Toll Like Receptor 4 (TLR4) Cascade	2	144	0.00978194	0.989219	0.989219	6	95	0.00718119	9606	Homo sapiens	MAPK11;DYRK3		R-HSA-168053;R-HSA-450257;R-HSA-450222;R-HSA-450333;R-HSA-198669;R-HSA-199917	https://reactome.org/PathwayBrowser/#/R-HSA-166016
R-HSA-388841	Costimulation by the CD28 family	1	100	0.00679302	0.989395	0.989395	5	35	0.0026457	9606	Homo sapiens	PDCD1		R-HSA-389762;R-HSA-388828;R-HSA-389759;R-HSA-389758;R-HSA-9679421	https://reactome.org/PathwayBrowser/#/R-HSA-388841
R-HSA-163685	Integration of energy metabolism	2	145	0.00984987	0.989639	0.989639	6	62	0.00468667	9606	Homo sapiens	CACNB3;ITPR3		R-HSA-169683;R-HSA-169680;R-HSA-400046;R-HSA-381644;R-HSA-265645;R-HSA-265166	https://reactome.org/PathwayBrowser/#/R-HSA-163685
R-HSA-975956	Nonsense Mediated Decay (NMD) independent of the Exon Junction Complex (EJC)	1	101	0.00686095	0.989868	0.989868	1	1	7.55915e-05	9606	Homo sapiens	GNL3L		R-HSA-927789	https://reactome.org/PathwayBrowser/#/R-HSA-975956
R-HSA-6802957	Oncogenic MAPK signaling	1	101	0.00686095	0.989868	0.989868	1	46	0.00347721	9606	Homo sapiens	SPRED3		R-HSA-6802837	https://reactome.org/PathwayBrowser/#/R-HSA-6802957
R-HSA-2682334	EPH-Ephrin signaling	1	101	0.00686095	0.989868	0.989868	1	56	0.00423312	9606	Homo sapiens	MYH9		R-HSA-3928616	https://reactome.org/PathwayBrowser/#/R-HSA-2682334
R-HSA-156842	Eukaryotic Translation Elongation	1	102	0.00692888	0.99032	0.99032	4	9	0.000680324	9606	Homo sapiens	GNL3L		R-HSA-156915;R-HSA-156912;R-HSA-156923;R-HSA-156907	https://reactome.org/PathwayBrowser/#/R-HSA-156842
R-HSA-983695	Antigen activates B Cell Receptor (BCR) leading to generation of second messengers	1	103	0.00699681	0.990751	0.990751	3	25	0.00188979	9606	Homo sapiens	ITPR3		R-HSA-169683;R-HSA-169680;R-HSA-1168376	https://reactome.org/PathwayBrowser/#/R-HSA-983695
R-HSA-2132295	MHC class II antigen presentation	2	148	0.0100537	0.990804	0.990804	1	26	0.00196538	9606	Homo sapiens	TUBA1A;SPTBN2		R-HSA-2213248	https://reactome.org/PathwayBrowser/#/R-HSA-2132295
R-HSA-397014	Muscle contraction	4	224	0.0152164	0.991104	0.991104	12	42	0.00317484	9606	Homo sapiens	TPM4;TNNT3;ITPR3;KCNK3		R-HSA-390597;R-HSA-169683;R-HSA-445700;R-HSA-390598;R-HSA-390593;R-HSA-445699;R-HSA-390595;R-HSA-5226904;R-HSA-5578910;R-HSA-139854;R-HSA-445704;R-HSA-445705	https://reactome.org/PathwayBrowser/#/R-HSA-397014
R-HSA-5668541	TNFR2 non-canonical NF-kB pathway	1	104	0.00706474	0.991164	0.991164	7	43	0.00325043	9606	Homo sapiens	LTB		R-HSA-5668454;R-HSA-5668534;R-HSA-5668789;R-HSA-5676593;R-HSA-5668481;R-HSA-5668414;R-HSA-5676591	https://reactome.org/PathwayBrowser/#/R-HSA-5668541
R-HSA-1632852	Macroautophagy	2	150	0.0101895	0.991508	0.991508	13	87	0.00657646	9606	Homo sapiens	TUBA1A;PCNT		R-HSA-9646354;R-HSA-9640114;R-HSA-9639698;R-HSA-9646679;R-HSA-9641111;R-HSA-9646390;R-HSA-9641109;R-HSA-9646685;R-HSA-9641127;R-HSA-9646347;R-HSA-9641096;R-HSA-9646383;R-HSA-9646348	https://reactome.org/PathwayBrowser/#/R-HSA-1632852
R-HSA-72764	Eukaryotic Translation Termination	1	106	0.0072006	0.991935	0.991935	3	5	0.000377958	9606	Homo sapiens	GNL3L		R-HSA-141671;R-HSA-141691;R-HSA-141673	https://reactome.org/PathwayBrowser/#/R-HSA-72764
R-HSA-72689	Formation of a pool of free 40S subunits	1	106	0.0072006	0.991935	0.991935	1	2	0.000151183	9606	Homo sapiens	GNL3L		R-HSA-72673	https://reactome.org/PathwayBrowser/#/R-HSA-72689
R-HSA-9664433	Leishmania parasite growth and survival	6	297	0.0201753	0.992492	0.992492	4	40	0.00302366	9606	Homo sapiens	RAMP2;PTGIR;GPR150;MYH9;ITPR3;RAMP1		R-HSA-169683;R-HSA-9663426;R-HSA-169680;R-HSA-9660824	https://reactome.org/PathwayBrowser/#/R-HSA-9664433
R-HSA-9662851	Anti-inflammatory response favouring Leishmania parasite infection	6	297	0.0201753	0.992492	0.992492	4	40	0.00302366	9606	Homo sapiens	RAMP2;PTGIR;GPR150;MYH9;ITPR3;RAMP1		R-HSA-169683;R-HSA-9663426;R-HSA-169680;R-HSA-9660824	https://reactome.org/PathwayBrowser/#/R-HSA-9662851
R-HSA-2029480	Fcgamma receptor (FCGR) dependent phagocytosis	3	193	0.0131105	0.992624	0.992624	8	42	0.00317484	9606	Homo sapiens	WIPF3;MYH9;ITPR3		R-HSA-169683;R-HSA-169680;R-HSA-2197698;R-HSA-2029466;R-HSA-442592;R-HSA-2197691;R-HSA-2029476;R-HSA-2197690	https://reactome.org/PathwayBrowser/#/R-HSA-2029480
R-HSA-9006934	Signaling by Receptor Tyrosine Kinases	17	629	0.0427281	0.992962	0.992962	39	704	0.0532164	9606	Homo sapiens	EGR1;NRP1;DYRK3;EGR3;EGR4;ITGA3;PLEKHG5;ITPR3;MAPK11;VGF;COL5A1;GRB10;COL9A2		R-HSA-9613202;R-HSA-171011;R-HSA-9031624;R-HSA-9613207;R-HSA-1433501;R-HSA-9613210;R-HSA-9031616;R-HSA-198669;R-HSA-169683;R-HSA-9612483;R-HSA-74707;R-HSA-169680;R-HSA-195408;R-HSA-8874079;R-HSA-9621386;R-HSA-9621385;R-HSA-9612493;R-HSA-9621042;R-HSA-9620723;R-HSA-382054;R-HSA-9620663;R-HSA-187688;R-HSA-9621048;R-HSA-9621054;R-HSA-199917;R-HSA-9612514;R-HSA-9613219;R-HSA-74740;R-HSA-9612516;R-HSA…	https://reactome.org/PathwayBrowser/#/R-HSA-9006934
R-HSA-381119	Unfolded Protein Response (UPR)	2	155	0.0105292	0.993047	0.993047	1	94	0.0071056	9606	Homo sapiens	PLA2G4B		R-HSA-1791071	https://reactome.org/PathwayBrowser/#/R-HSA-381119
R-HSA-9614085	FOXO-mediated transcription	1	110	0.00747232	0.993281	0.993281	51	85	0.00642528	9606	Homo sapiens	FOXO3B		R-HSA-199299;R-HSA-9624976;R-HSA-9621270;R-HSA-9625749;R-HSA-9620891;R-HSA-9623192;R-HSA-9624985;R-HSA-9625375;R-HSA-9623427;R-HSA-9625091;R-HSA-9623168;R-HSA-9625092;R-HSA-9622667;R-HSA-9622668;R-HSA-9622579;R-HSA-9620915;R-HSA-9617840;R-HSA-9624624;R-HSA-9620532;R-HSA-9620788;R-HSA-9617972;R-HSA-9617848;R-HSA-9625406;R-HSA-9617852;R-HSA-9617853;R-HSA-9625378;R-HSA-9620515;R-HSA-9624611;R-HSA-96…	https://reactome.org/PathwayBrowser/#/R-HSA-9614085
R-HSA-9009391	Extra-nuclear estrogen signaling	1	110	0.00747232	0.993281	0.993281	1	38	0.00287248	9606	Homo sapiens	FOXO3B		R-HSA-9624526	https://reactome.org/PathwayBrowser/#/R-HSA-9009391
R-HSA-9664407	Parasite infection	2	157	0.010665	0.993583	0.993583	6	27	0.00204097	9606	Homo sapiens	WIPF3;MYH9		R-HSA-2197698;R-HSA-2029466;R-HSA-442592;R-HSA-9666458;R-HSA-2197691;R-HSA-2197690	https://reactome.org/PathwayBrowser/#/R-HSA-9664407
R-HSA-9664422	FCGR3A-mediated phagocytosis	2	157	0.010665	0.993583	0.993583	6	27	0.00204097	9606	Homo sapiens	WIPF3;MYH9		R-HSA-2197698;R-HSA-2029466;R-HSA-442592;R-HSA-9666458;R-HSA-2197691;R-HSA-2197690	https://reactome.org/PathwayBrowser/#/R-HSA-9664422
R-HSA-9664417	Leishmania phagocytosis	2	157	0.010665	0.993583	0.993583	6	27	0.00204097	9606	Homo sapiens	WIPF3;MYH9		R-HSA-2197698;R-HSA-2029466;R-HSA-442592;R-HSA-9666458;R-HSA-2197691;R-HSA-2197690	https://reactome.org/PathwayBrowser/#/R-HSA-9664417
R-HSA-2029482	Regulation of actin dynamics for phagocytic cup formation	2	158	0.010733	0.993836	0.993836	6	24	0.0018142	9606	Homo sapiens	WIPF3;MYH9		R-HSA-2197698;R-HSA-2029466;R-HSA-442592;R-HSA-2197691;R-HSA-2029476;R-HSA-2197690	https://reactome.org/PathwayBrowser/#/R-HSA-2029482
R-HSA-2408557	Selenocysteine synthesis	1	112	0.00760818	0.993867	0.993867	2	7	0.000529141	9606	Homo sapiens	GNL3L		R-HSA-2408529;R-HSA-5333615	https://reactome.org/PathwayBrowser/#/R-HSA-2408557
R-HSA-1483255	PI Metabolism	1	112	0.00760818	0.993867	0.993867	5	89	0.00672764	9606	Homo sapiens	AKAP12		R-HSA-1675773;R-HSA-1676145;R-HSA-1676082;R-HSA-1675810;R-HSA-1676134	https://reactome.org/PathwayBrowser/#/R-HSA-1483255
R-HSA-192823	Viral mRNA Translation	1	114	0.00774404	0.994402	0.994402	2	2	0.000151183	9606	Homo sapiens	GNL3L		R-HSA-192704;R-HSA-192841	https://reactome.org/PathwayBrowser/#/R-HSA-192823
R-HSA-442755	Activation of NMDA receptors and postsynaptic events	1	114	0.00774404	0.994402	0.994402	3	71	0.005367	9606	Homo sapiens	TUBA1A		R-HSA-9610627;R-HSA-9619542;R-HSA-9610408	https://reactome.org/PathwayBrowser/#/R-HSA-442755
R-HSA-9633012	Response of EIF2AK4 (GCN2) to amino acid deficiency	1	115	0.00781197	0.994652	0.994652	4	16	0.00120946	9606	Homo sapiens	GNL3L		R-HSA-9633008;R-HSA-9633742;R-HSA-9634669;R-HSA-9633005	https://reactome.org/PathwayBrowser/#/R-HSA-9633012
R-HSA-5621481	C-type lectin receptors (CLRs)	3	203	0.0137898	0.994894	0.994894	4	68	0.00514022	9606	Homo sapiens	MUC2;ITPR3;CARD11		R-HSA-169683;R-HSA-169680;R-HSA-8858500;R-HSA-202534	https://reactome.org/PathwayBrowser/#/R-HSA-5621481
R-HSA-422475	Axon guidance	15	586	0.0398071	0.994929	0.994929	64	298	0.0225263	9606	Homo sapiens	NRP1;SPTBN5;PLEKHG5;L1CAM;MAPK11;CACNB3;TUBA1A;GNL3L;COL5A1;ITGA10;GRB10;MYH9;COL9A2;SPTBN2		R-HSA-525833;R-HSA-443783;R-HSA-443780;R-HSA-443778;R-HSA-443779;R-HSA-374669;R-HSA-445071;R-HSA-445069;R-HSA-9010951;R-HSA-443784;R-HSA-374677;R-HSA-445079;R-HSA-445076;R-HSA-445077;R-HSA-3928616;R-HSA-374673;R-HSA-374672;R-HSA-374675;R-HSA-445084;R-HSA-374686;R-HSA-374681;R-HSA-445083;R-HSA-374680;R-HSA-374683;R-HSA-451366;R-HSA-445088;R-HSA-445089;R-HSA-392749;R-HSA-392748;R-HSA-392751;R-HSA-3…	https://reactome.org/PathwayBrowser/#/R-HSA-422475
R-HSA-425393	Transport of inorganic cations/anions and amino acids/oligopeptides	2	164	0.0111405	0.995159	0.995159	2	75	0.00566936	9606	Homo sapiens	SLC9A3;SLC4A3;ARHGAP23		R-HSA-425994;R-HSA-425482	https://reactome.org/PathwayBrowser/#/R-HSA-425393
R-HSA-5668914	Diseases of metabolism	9	408	0.0277155	0.995166	0.995166	21	191	0.014438	9606	Homo sapiens	CYP26B1;MUC2;ABCA3;SDC3;IDS;NHLRC1;CHST14;ADAMTS9;ADAMTS7		R-HSA-3636919;R-HSA-9036046;R-HSA-9036289;R-HSA-3656254;R-HSA-9036290;R-HSA-4420365;R-HSA-3560804;R-HSA-9036283;R-HSA-3656261;R-HSA-6785524;R-HSA-3797226;R-HSA-3560802;R-HSA-9036285;R-HSA-5096537;R-HSA-2262743;R-HSA-3656257;R-HSA-5096532;R-HSA-5602063;R-HSA-6785565;R-HSA-5688397;R-HSA-3656267	https://reactome.org/PathwayBrowser/#/R-HSA-5668914
R-HSA-9612973	Autophagy	2	166	0.0112764	0.995535	0.995535	24	108	0.00816388	9606	Homo sapiens	TUBA1A;PCNT		R-HSA-9646354;R-HSA-9640114;R-HSA-9639698;R-HSA-9646679;R-HSA-9641111;R-HSA-9646390;R-HSA-9641109;R-HSA-9622840;R-HSA-9631065;R-HSA-9624158;R-HSA-9646685;R-HSA-9631068;R-HSA-9641127;R-HSA-9625188;R-HSA-9620197;R-HSA-9646347;R-HSA-9615721;R-HSA-9641096;R-HSA-9646383;R-HSA-9622831;R-HSA-9625196;R-HSA-9626060;R-HSA-9625197;R-HSA-9646348	https://reactome.org/PathwayBrowser/#/R-HSA-9612973
R-HSA-1799339	SRP-dependent cotranslational protein targeting to membrane	1	119	0.00808369	0.995545	0.995545	5	5	0.000377958	9606	Homo sapiens	GNL3L		R-HSA-1799326;R-HSA-1799330;R-HSA-1799329;R-HSA-1799335;R-HSA-1799332	https://reactome.org/PathwayBrowser/#/R-HSA-1799339
R-HSA-5696398	Nucleotide Excision Repair	1	119	0.00808369	0.995545	0.995545	12	37	0.00279689	9606	Homo sapiens	UVSSA		R-HSA-6782069;R-HSA-6782004;R-HSA-6782211;R-HSA-6782131;R-HSA-6782227;R-HSA-9684118;R-HSA-6782224;R-HSA-6782208;R-HSA-6782141;R-HSA-6782204;R-HSA-6782138;R-HSA-6782234	https://reactome.org/PathwayBrowser/#/R-HSA-5696398
R-HSA-983168	Antigen processing: Ubiquitination & Proteasome degradation	6	315	0.021398	0.995704	0.995704	4	9	0.000680324	9606	Homo sapiens	RNF213;HERC2;HERC1;UBR4;KLHL11;HERC6		R-HSA-983147;R-HSA-983157;R-HSA-983156;R-HSA-983140	https://reactome.org/PathwayBrowser/#/R-HSA-983168
R-HSA-72706	GTP hydrolysis and joining of the 60S ribosomal subunit	1	120	0.00815162	0.995744	0.995744	2	3	0.000226775	9606	Homo sapiens	GNL3L		R-HSA-72672;R-HSA-72671	https://reactome.org/PathwayBrowser/#/R-HSA-72706
R-HSA-156827	L13a-mediated translational silencing of Ceruloplasmin expression	1	120	0.00815162	0.995744	0.995744	1	3	0.000226775	9606	Homo sapiens	GNL3L		R-HSA-156826	https://reactome.org/PathwayBrowser/#/R-HSA-156827
R-HSA-9648025	EML4 and NUDC in mitotic spindle formation	1	121	0.00821955	0.995934	0.995934	2	5	0.000377958	9606	Homo sapiens	TUBA1A		R-HSA-9648114;R-HSA-9648017	https://reactome.org/PathwayBrowser/#/R-HSA-9648025
R-HSA-983712	Ion channel transport	3	212	0.0144012	0.996347	0.996347	7	44	0.00332603	9606	Homo sapiens	CLCNKB;MEIS3;SLC9B1		R-HSA-2744361;R-HSA-9659568;R-HSA-5333671;R-HSA-2872444;R-HSA-2744242;R-HSA-2744228;R-HSA-2684901	https://reactome.org/PathwayBrowser/#/R-HSA-983712
R-HSA-6807070	PTEN Regulation	2	171	0.0116161	0.996354	0.996354	26	56	0.00423312	9606	Homo sapiens	EGR1;TNRC6B		R-HSA-8944650;R-HSA-8944522;R-HSA-2318752;R-HSA-8948621;R-HSA-8944078;R-HSA-8948623;R-HSA-8944706;R-HSA-8948612;R-HSA-8948569;R-HSA-8944538;R-HSA-8944599;R-HSA-8944104;R-HSA-8948651;R-HSA-8944684;R-HSA-8948524;R-HSA-8945709;R-HSA-8948641;R-HSA-8944483;R-HSA-8948582;R-HSA-8948583;R-HSA-8944632;R-HSA-8948536;R-HSA-8944569;R-HSA-8948602;R-HSA-8944497;R-HSA-8948594	https://reactome.org/PathwayBrowser/#/R-HSA-6807070
R-HSA-927802	Nonsense-Mediated Decay (NMD)	1	124	0.00842334	0.996455	0.996455	5	6	0.000453549	9606	Homo sapiens	GNL3L		R-HSA-927836;R-HSA-927789;R-HSA-927832;R-HSA-927813;R-HSA-927889	https://reactome.org/PathwayBrowser/#/R-HSA-927802
R-HSA-975957	Nonsense Mediated Decay (NMD) enhanced by the Exon Junction Complex (EJC)	1	124	0.00842334	0.996455	0.996455	4	5	0.000377958	9606	Homo sapiens	GNL3L		R-HSA-927836;R-HSA-927832;R-HSA-927813;R-HSA-927889	https://reactome.org/PathwayBrowser/#/R-HSA-975957
R-HSA-202424	Downstream TCR signaling	1	124	0.00842334	0.996455	0.996455	12	24	0.0018142	9606	Homo sapiens	CARD11		R-HSA-202466;R-HSA-202534;R-HSA-202437;R-HSA-202453;R-HSA-202500;R-HSA-202443;R-HSA-202459;R-HSA-202394;R-HSA-202489;R-HSA-202472;R-HSA-202478;R-HSA-202510	https://reactome.org/PathwayBrowser/#/R-HSA-202424
R-HSA-5610787	Hedgehog 'off' state	1	124	0.00842334	0.996455	0.996455	2	32	0.00241893	9606	Homo sapiens	TUBA1A		R-HSA-5610733;R-HSA-5610767	https://reactome.org/PathwayBrowser/#/R-HSA-5610787
R-HSA-5628897	TP53 Regulates Metabolic Genes	1	125	0.00849127	0.996613	0.996613	2	34	0.00257011	9606	Homo sapiens	TNRC6B		R-HSA-2318752;R-HSA-2321904	https://reactome.org/PathwayBrowser/#/R-HSA-5628897
R-HSA-6785807	Interleukin-4 and Interleukin-13 signaling	3	216	0.0146729	0.996855	0.996855	1	47	0.0035528	9606	Homo sapiens	SOX2;FOXO3B		R-HSA-6790036	https://reactome.org/PathwayBrowser/#/R-HSA-6785807
R-HSA-2871809	FCERI mediated Ca+2 mobilization	1	129	0.00876299	0.997179	0.997179	2	11	0.000831507	9606	Homo sapiens	ITPR3		R-HSA-169683;R-HSA-169680	https://reactome.org/PathwayBrowser/#/R-HSA-2871809
R-HSA-2029485	Role of phospholipids in phagocytosis	1	129	0.00876299	0.997179	0.997179	2	12	0.000907098	9606	Homo sapiens	ITPR3		R-HSA-169683;R-HSA-169680	https://reactome.org/PathwayBrowser/#/R-HSA-2029485
R-HSA-6811558	PI5P, PP2A and IER3 Regulate PI3K/AKT Signaling	1	129	0.00876299	0.997179	0.997179	1	7	0.000529141	9606	Homo sapiens	AKAP12		R-HSA-1676082	https://reactome.org/PathwayBrowser/#/R-HSA-6811558
R-HSA-9007101	Rab regulation of trafficking	1	129	0.00876299	0.997179	0.997179	2	35	0.0026457	9606	Homo sapiens	RAB6B		R-HSA-8876193;R-HSA-8854303	https://reactome.org/PathwayBrowser/#/R-HSA-9007101
R-HSA-72613	Eukaryotic Translation Initiation	1	130	0.00883092	0.997305	0.997305	4	21	0.00158742	9606	Homo sapiens	GNL3L		R-HSA-72673;R-HSA-72672;R-HSA-156826;R-HSA-72671	https://reactome.org/PathwayBrowser/#/R-HSA-72613
R-HSA-72737	Cap-dependent Translation Initiation	1	130	0.00883092	0.997305	0.997305	3	18	0.00136065	9606	Homo sapiens	GNL3L		R-HSA-72673;R-HSA-72672;R-HSA-72671	https://reactome.org/PathwayBrowser/#/R-HSA-72737
R-HSA-446219	Synthesis of substrates in N-glycan biosythesis	1	131	0.00889885	0.997426	0.997426	1	49	0.00370398	9606	Homo sapiens	ST8SIA5		R-HSA-4084978	https://reactome.org/PathwayBrowser/#/R-HSA-446219
R-HSA-1500931	Cell-Cell communication	1	133	0.00903471	0.99765	0.99765	6	60	0.00453549	9606	Homo sapiens	PLEC		R-HSA-446083;R-HSA-432956;R-HSA-446077;R-HSA-432909;R-HSA-432952;R-HSA-446089	https://reactome.org/PathwayBrowser/#/R-HSA-1500931
R-HSA-2500257	Resolution of Sister Chromatid Cohesion	1	134	0.00910264	0.997755	0.997755	4	8	0.000604732	9606	Homo sapiens	TUBA1A		R-HSA-2484822;R-HSA-1638803;R-HSA-2468287;R-HSA-1638821	https://reactome.org/PathwayBrowser/#/R-HSA-2500257
R-HSA-9635486	Infection with Mycobacterium tuberculosis	1	135	0.00917057	0.997856	0.997856	1	73	0.00551818	9606	Homo sapiens	RNF213		R-HSA-9635609	https://reactome.org/PathwayBrowser/#/R-HSA-9635486
R-HSA-9675108	Nervous system development	15	622	0.0422526	0.997898	0.997898	64	324	0.0244916	9606	Homo sapiens	NRP1;SPTBN5;PLEKHG5;L1CAM;MAPK11;CACNB3;TUBA1A;GNL3L;COL5A1;ITGA10;GRB10;MYH9;COL9A2;SPTBN2		R-HSA-525833;R-HSA-443783;R-HSA-443780;R-HSA-443778;R-HSA-443779;R-HSA-374669;R-HSA-445071;R-HSA-445069;R-HSA-9010951;R-HSA-443784;R-HSA-374677;R-HSA-445079;R-HSA-445076;R-HSA-445077;R-HSA-3928616;R-HSA-374673;R-HSA-374672;R-HSA-374675;R-HSA-445084;R-HSA-374686;R-HSA-374681;R-HSA-445083;R-HSA-374680;R-HSA-374683;R-HSA-451366;R-HSA-445088;R-HSA-445089;R-HSA-392749;R-HSA-392748;R-HSA-392751;R-HSA-3…	https://reactome.org/PathwayBrowser/#/R-HSA-9675108
R-HSA-168898	Toll-like Receptor Cascades	2	185	0.0125671	0.99794	0.99794	6	185	0.0139844	9606	Homo sapiens	MAPK11;DYRK3		R-HSA-168053;R-HSA-450257;R-HSA-450222;R-HSA-450333;R-HSA-198669;R-HSA-199917	https://reactome.org/PathwayBrowser/#/R-HSA-168898
R-HSA-199418	Negative regulation of the PI3K/AKT network	1	137	0.00930643	0.998043	0.998043	1	10	0.000755915	9606	Homo sapiens	AKAP12		R-HSA-1676082	https://reactome.org/PathwayBrowser/#/R-HSA-199418
R-HSA-114608	Platelet degranulation	1	137	0.00930643	0.998043	0.998043	1	11	0.000831507	9606	Homo sapiens	TMSB4X		R-HSA-481007	https://reactome.org/PathwayBrowser/#/R-HSA-114608
R-HSA-2219528	PI3K/AKT Signaling in Cancer	1	137	0.00930643	0.998043	0.998043	1	21	0.00158742	9606	Homo sapiens	FOXO3B		R-HSA-2399992	https://reactome.org/PathwayBrowser/#/R-HSA-2219528
R-HSA-6791226	Major pathway of rRNA processing in the nucleolus and cytosol	2	189	0.0128388	0.998252	0.998252	5	7	0.000529141	9606	Homo sapiens	GNL3L;SNORD3A		R-HSA-6791222;R-HSA-6791221;R-HSA-6791218;R-HSA-6791228;R-HSA-6791227	https://reactome.org/PathwayBrowser/#/R-HSA-6791226
R-HSA-1483206	Glycerophospholipid biosynthesis	3	232	0.0157598	0.998282	0.998282	22	133	0.0100537	9606	Homo sapiens	PLA2G4B;NES		R-HSA-1482646;R-HSA-1482900;R-HSA-1482612;R-HSA-1482932;R-HSA-1482547;R-HSA-1482771;R-HSA-1482897;R-HSA-1482847;R-HSA-1482685;R-HSA-1482745;R-HSA-1482884;R-HSA-1482533;R-HSA-1482691;R-HSA-1482656;R-HSA-1482862;R-HSA-1482636;R-HSA-1482604;R-HSA-1482828;R-HSA-1482667;R-HSA-1482856;R-HSA-1482920;R-HSA-1482825	https://reactome.org/PathwayBrowser/#/R-HSA-1483206
R-HSA-9664323	FCGR3A-mediated IL10 synthesis	1	141	0.00957815	0.99837	0.99837	2	20	0.00151183	9606	Homo sapiens	ITPR3		R-HSA-169683;R-HSA-169680	https://reactome.org/PathwayBrowser/#/R-HSA-9664323
R-HSA-983705	Signaling by the B Cell Receptor (BCR)	2	191	0.0129747	0.99839	0.99839	7	44	0.00332603	9606	Homo sapiens	ITPR3;CARD11		R-HSA-1168641;R-HSA-169683;R-HSA-169680;R-HSA-1168644;R-HSA-1168376;R-HSA-1168635;R-HSA-1168637	https://reactome.org/PathwayBrowser/#/R-HSA-983705
R-HSA-76005	Response to elevated platelet cytosolic Ca2+	1	144	0.00978194	0.998579	0.998579	1	14	0.00105828	9606	Homo sapiens	TMSB4X		R-HSA-481007	https://reactome.org/PathwayBrowser/#/R-HSA-76005
R-HSA-202403	TCR signaling	1	147	0.00998573	0.998762	0.998762	12	52	0.00393076	9606	Homo sapiens	CARD11		R-HSA-202466;R-HSA-202534;R-HSA-202437;R-HSA-202453;R-HSA-202500;R-HSA-202443;R-HSA-202459;R-HSA-202394;R-HSA-202489;R-HSA-202472;R-HSA-202478;R-HSA-202510	https://reactome.org/PathwayBrowser/#/R-HSA-202403
R-HSA-8868773	rRNA processing in the nucleus and cytosol	2	207	0.0140615	0.999169	0.999169	6	15	0.00113387	9606	Homo sapiens	GNL3L;SNORD3A		R-HSA-6791222;R-HSA-6791221;R-HSA-6791218;R-HSA-6791228;R-HSA-6791227;R-HSA-6790906	https://reactome.org/PathwayBrowser/#/R-HSA-8868773
R-HSA-9658195	Leishmania infection	7	403	0.0273759	0.999226	0.999226	10	95	0.00718119	9606	Homo sapiens	RAMP2;PTGIR;GPR150;WIPF3;MYH9;ITPR3;RAMP1		R-HSA-169683;R-HSA-9663426;R-HSA-169680;R-HSA-2197698;R-HSA-2029466;R-HSA-442592;R-HSA-9666458;R-HSA-2197691;R-HSA-9660824;R-HSA-2197690	https://reactome.org/PathwayBrowser/#/R-HSA-9658195
R-HSA-5683057	MAPK family signaling cascades	7	403	0.0273759	0.999226	0.999226	11	122	0.00922216	9606	Homo sapiens	SPRED3;SPTBN5;RASA3;FOXO3B;IL17RD;TNRC6B;SPTBN2		R-HSA-5658438;R-HSA-5658231;R-HSA-5674373;R-HSA-5672965;R-HSA-5658435;R-HSA-5658430;R-HSA-5674366;R-HSA-5687103;R-HSA-5687101;R-HSA-5658424;R-HSA-5687113	https://reactome.org/PathwayBrowser/#/R-HSA-5683057
R-HSA-446193	Biosynthesis of the N-glycan precursor (dolichol lipid-linked oligosaccharide, LLO) and transfer to a nascent protein	1	159	0.0108009	0.999285	0.999285	1	63	0.00476226	9606	Homo sapiens	ST8SIA5		R-HSA-4084978	https://reactome.org/PathwayBrowser/#/R-HSA-446193
R-HSA-375276	Peptide ligand-binding receptors	2	211	0.0143333	0.999296	0.999296	2	76	0.00574495	9606	Homo sapiens	SSTR3;NTSR1		R-HSA-388900;R-HSA-374758	https://reactome.org/PathwayBrowser/#/R-HSA-375276
R-HSA-9679191	Potential therapeutics for SARS	1	161	0.0109368	0.999348	0.999348	1	32	0.00241893	9606	Homo sapiens	PDCD1		R-HSA-9679421	https://reactome.org/PathwayBrowser/#/R-HSA-9679191
R-HSA-202733	Cell surface interactions at the vascular wall	3	258	0.017526	0.999369	0.999369	3	65	0.00491345	9606	Homo sapiens	ITGA3;SDC3;L1CAM		R-HSA-204434;R-HSA-375133;R-HSA-8870732	https://reactome.org/PathwayBrowser/#/R-HSA-202733
R-HSA-428157	Sphingolipid metabolism	1	162	0.0110047	0.999377	0.999377	1	64	0.00483786	9606	Homo sapiens	PRKD1		R-HSA-429698	https://reactome.org/PathwayBrowser/#/R-HSA-428157
R-HSA-2173782	Binding and Uptake of Ligands by Scavenger Receptors	1	167	0.0113443	0.999504	0.999504	1	33	0.00249452	9606	Homo sapiens	COL9A2		R-HSA-3221843	https://reactome.org/PathwayBrowser/#/R-HSA-2173782
R-HSA-5673001	RAF/MAP kinase cascade	5	345	0.0234359	0.999523	0.999523	8	75	0.00566936	9606	Homo sapiens	SPRED3;SPTBN5;RASA3;IL17RD;SPTBN2		R-HSA-5658438;R-HSA-5658231;R-HSA-5674373;R-HSA-5672965;R-HSA-5658435;R-HSA-5658430;R-HSA-5674366;R-HSA-5658424	https://reactome.org/PathwayBrowser/#/R-HSA-5673001
R-HSA-5358351	Signaling by Hedgehog	1	168	0.0114123	0.999527	0.999527	2	82	0.0061985	9606	Homo sapiens	TUBA1A		R-HSA-5610733;R-HSA-5610767	https://reactome.org/PathwayBrowser/#/R-HSA-5358351
R-HSA-5684996	MAPK1/MAPK3 signaling	5	352	0.0239114	0.999627	0.999627	8	82	0.0061985	9606	Homo sapiens	SPRED3;SPTBN5;RASA3;IL17RD;SPTBN2		R-HSA-5658438;R-HSA-5658231;R-HSA-5674373;R-HSA-5672965;R-HSA-5658435;R-HSA-5658430;R-HSA-5674366;R-HSA-5658424	https://reactome.org/PathwayBrowser/#/R-HSA-5684996
R-HSA-1989781	PPARA activates gene expression	1	174	0.0118198	0.999641	0.999641	41	41	0.00309925	9606	Homo sapiens	HELZ2		R-HSA-1655826;R-HSA-1989778;R-HSA-1989779;R-HSA-560517;R-HSA-1989776;R-HSA-1989777;R-HSA-1989774;R-HSA-560473;R-HSA-1989775;R-HSA-1989772;R-HSA-1989773;R-HSA-1989770;R-HSA-1368065;R-HSA-1989771;R-HSA-1989768;R-HSA-1989767;R-HSA-1989764;R-HSA-1989765;R-HSA-1989762;R-HSA-1989760;R-HSA-1989761;R-HSA-1989758;R-HSA-1989759;R-HSA-879724;R-HSA-1989756;R-HSA-1989757;R-HSA-1989754;R-HSA-1989755;R-HSA-1989…	https://reactome.org/PathwayBrowser/#/R-HSA-1989781
R-HSA-2871837	FCERI mediated NF-kB activation	1	175	0.0118878	0.999657	0.999657	11	19	0.00143624	9606	Homo sapiens	CARD11		R-HSA-2730904;R-HSA-2730861;R-HSA-2730876;R-HSA-202534;R-HSA-2730863;R-HSA-2730864;R-HSA-2730899;R-HSA-2730900;R-HSA-2730836;R-HSA-2730903;R-HSA-2730902	https://reactome.org/PathwayBrowser/#/R-HSA-2871837
R-HSA-400206	Regulation of lipid metabolism by PPARalpha	1	176	0.0119557	0.999672	0.999672	42	44	0.00332603	9606	Homo sapiens	HELZ2		R-HSA-400143;R-HSA-1655826;R-HSA-1989778;R-HSA-1989779;R-HSA-560517;R-HSA-1989776;R-HSA-1989777;R-HSA-1989774;R-HSA-560473;R-HSA-1989775;R-HSA-1989772;R-HSA-1989773;R-HSA-1989770;R-HSA-1368065;R-HSA-1989771;R-HSA-1989768;R-HSA-1989767;R-HSA-1989764;R-HSA-1989765;R-HSA-1989762;R-HSA-1989760;R-HSA-1989761;R-HSA-1989758;R-HSA-1989759;R-HSA-879724;R-HSA-1989756;R-HSA-1989757;R-HSA-1989754;R-HSA-19897…	https://reactome.org/PathwayBrowser/#/R-HSA-400206
R-HSA-168273	Influenza Viral RNA Transcription and Replication	1	176	0.0119557	0.999672	0.999672	2	14	0.00105828	9606	Homo sapiens	GNL3L		R-HSA-192704;R-HSA-192841	https://reactome.org/PathwayBrowser/#/R-HSA-168273
R-HSA-198933	Immunoregulatory interactions between a Lymphoid and a non-Lymphoid cell	4	317	0.0215339	0.99968	0.99968	5	44	0.00332603	9606	Homo sapiens	KLRK1;KLRC2;NCR3LG1;COL9A2		R-HSA-5696356;R-HSA-5696357;R-HSA-5685602;R-HSA-198983;R-HSA-199062	https://reactome.org/PathwayBrowser/#/R-HSA-198933
R-HSA-1257604	PIP3 activates AKT signaling	4	319	0.0216697	0.999703	0.999703	28	86	0.00650087	9606	Homo sapiens	AKAP12;EGR1;FOXO3B;TNRC6B		R-HSA-199299;R-HSA-8944650;R-HSA-8944522;R-HSA-2318752;R-HSA-8948621;R-HSA-8944078;R-HSA-8948623;R-HSA-8944706;R-HSA-8948612;R-HSA-8948569;R-HSA-8944538;R-HSA-8944599;R-HSA-8944104;R-HSA-8948651;R-HSA-8944684;R-HSA-8948524;R-HSA-8945709;R-HSA-8948641;R-HSA-1676082;R-HSA-8944483;R-HSA-8948582;R-HSA-8948583;R-HSA-8944632;R-HSA-8948536;R-HSA-8944569;R-HSA-8948602;R-HSA-8944497;R-HSA-8948594	https://reactome.org/PathwayBrowser/#/R-HSA-1257604
R-HSA-112314	Neurotransmitter receptors and postsynaptic signal transmission	2	232	0.0157598	0.999708	0.999708	4	109	0.00823947	9606	Homo sapiens	TUBA1A;EPB41L1		R-HSA-9610627;R-HSA-9619542;R-HSA-416320;R-HSA-9610408	https://reactome.org/PathwayBrowser/#/R-HSA-112314
R-HSA-199991	Membrane Trafficking	14	666	0.0452415	0.999711	0.999711	40	219	0.0165545	9606	Homo sapiens	SPTBN5;RALGAPA2;BICD1;BICD2;GJC1;TUBA1A;GJC2;COL7A1;MAN1C1;MYH9;KIF1C;RAB6B;SPTBN2		R-HSA-6811431;R-HSA-8849350;R-HSA-6811429;R-HSA-6811428;R-HSA-8849348;R-HSA-5694418;R-HSA-6811426;R-HSA-203973;R-HSA-5694417;R-HSA-1458463;R-HSA-6809006;R-HSA-6809003;R-HSA-5694427;R-HSA-8849353;R-HSA-6809011;R-HSA-8847635;R-HSA-6809010;R-HSA-190682;R-HSA-8854303;R-HSA-2316347;R-HSA-5694409;R-HSA-190877;R-HSA-6807877;R-HSA-1458485;R-HSA-2316352;R-HSA-6807875;R-HSA-8876193;R-HSA-5694527;R-HSA-2040…	https://reactome.org/PathwayBrowser/#/R-HSA-199991
R-HSA-2408522	Selenoamino acid metabolism	1	180	0.0122274	0.999727	0.999727	2	33	0.00249452	9606	Homo sapiens	GNL3L		R-HSA-2408529;R-HSA-5333615	https://reactome.org/PathwayBrowser/#/R-HSA-2408522
R-HSA-2454202	Fc epsilon receptor (FCERI) signaling	2	235	0.0159636	0.999742	0.999742	13	63	0.00476226	9606	Homo sapiens	ITPR3;CARD11		R-HSA-2730861;R-HSA-202534;R-HSA-2730863;R-HSA-169683;R-HSA-2730904;R-HSA-169680;R-HSA-2730876;R-HSA-2730864;R-HSA-2730899;R-HSA-2730900;R-HSA-2730836;R-HSA-2730903;R-HSA-2730902	https://reactome.org/PathwayBrowser/#/R-HSA-2454202
R-HSA-376176	Signaling by ROBO receptors	2	235	0.0159636	0.999742	0.999742	3	60	0.00453549	9606	Homo sapiens	NRP1;GNL3L		R-HSA-9014652;R-HSA-9014610;R-HSA-9010951	https://reactome.org/PathwayBrowser/#/R-HSA-376176
R-HSA-72306	tRNA processing	1	182	0.0123633	0.999751	0.999751	1	54	0.00408194	9606	Homo sapiens	RPPH1		R-HSA-5696810	https://reactome.org/PathwayBrowser/#/R-HSA-72306
R-HSA-9010553	Regulation of expression of SLITs and ROBOs	1	183	0.0124312	0.999762	0.999762	2	20	0.00151183	9606	Homo sapiens	GNL3L		R-HSA-9014652;R-HSA-9014610	https://reactome.org/PathwayBrowser/#/R-HSA-9010553
R-HSA-1483257	Phospholipid metabolism	4	325	0.0220773	0.999763	0.999763	27	218	0.0164789	9606	Homo sapiens	AKAP12;PLA2G4B;NES		R-HSA-1482646;R-HSA-1482900;R-HSA-1482771;R-HSA-1482897;R-HSA-1482847;R-HSA-1482884;R-HSA-1482691;R-HSA-1482636;R-HSA-1482828;R-HSA-1482825;R-HSA-1482612;R-HSA-1482932;R-HSA-1675773;R-HSA-1482547;R-HSA-1676145;R-HSA-1676082;R-HSA-1482685;R-HSA-1482745;R-HSA-1482533;R-HSA-1482656;R-HSA-1482862;R-HSA-1482604;R-HSA-1675810;R-HSA-1482667;R-HSA-1482856;R-HSA-1482920;R-HSA-1676134	https://reactome.org/PathwayBrowser/#/R-HSA-1483257
R-HSA-416476	G alpha (q) signalling events	3	283	0.0192242	0.999763	0.999763	9	35	0.0026457	9606	Homo sapiens	RGS19;ITPR3;NTSR1		R-HSA-418582;R-HSA-8982025;R-HSA-749448;R-HSA-8982026;R-HSA-139941;R-HSA-749452;R-HSA-8982017;R-HSA-139854;R-HSA-379048	https://reactome.org/PathwayBrowser/#/R-HSA-416476
R-HSA-9006925	Intracellular signaling by second messengers	5	366	0.0248624	0.999774	0.999774	30	114	0.00861743	9606	Homo sapiens	AKAP12;EGR1;FOXO3B;ITPR3;TNRC6B		R-HSA-199299;R-HSA-8944650;R-HSA-8944522;R-HSA-2318752;R-HSA-8948621;R-HSA-8944078;R-HSA-8948623;R-HSA-8944706;R-HSA-8948612;R-HSA-169683;R-HSA-8948569;R-HSA-169680;R-HSA-8944538;R-HSA-8944599;R-HSA-8944104;R-HSA-8948651;R-HSA-8944684;R-HSA-8948524;R-HSA-8945709;R-HSA-8948641;R-HSA-1676082;R-HSA-8944483;R-HSA-8948582;R-HSA-8948583;R-HSA-8944632;R-HSA-8948536;R-HSA-8944569;R-HSA-8948602;R-HSA-8944…	https://reactome.org/PathwayBrowser/#/R-HSA-9006925
R-HSA-1266738	Developmental Biology	34	1263	0.0857958	0.999778	0.999778	153	556	0.0420289	9606	Homo sapiens	NRP1;KMT2D;SPTBN5;HIST1H2BO;ONECUT1;NTN3;SOX2;HELZ2;TUBA1A;GRB10;FOXO3B;HIST1H3B;SPTBN2;WNT10B;PLEKHG5;GDF1;L1CAM;MAPK11;CACNB3;HIST1H4B;GNL3L;COL5A1;HIST4H4;ITGA10;CCDC88C;HIST1H4H;MYH9;COL9A2;HIST1H2BG;MAML3;HIST1H4C;HIST1H4E;HIST1H2BD		R-HSA-5617492;R-HSA-525833;R-HSA-2972975;R-HSA-480515;R-HSA-2972965;R-HSA-1183003;R-HSA-2972964;R-HSA-2972967;R-HSA-2972966;R-HSA-2972960;R-HSA-2972962;R-HSA-3928616;R-HSA-452894;R-HSA-5617484;R-HSA-5617486;R-HSA-2972977;R-HSA-5617483;R-HSA-2972979;R-HSA-2972978;R-HSA-451366;R-HSA-392749;R-HSA-392748;R-HSA-392751;R-HSA-452392;R-HSA-555065;R-HSA-1112609;R-HSA-2972956;R-HSA-392752;R-HSA-399934;R-HS…	https://reactome.org/PathwayBrowser/#/R-HSA-1266738
R-HSA-72163	mRNA Splicing - Major Pathway	1	185	0.0125671	0.999783	0.999783	2	9	0.000680324	9606	Homo sapiens	ZNF608		R-HSA-72130;R-HSA-72127	https://reactome.org/PathwayBrowser/#/R-HSA-72163
R-HSA-211897	Cytochrome P450 - arranged by substrate type	1	186	0.012635	0.999793	0.999793	1	61	0.00461108	9606	Homo sapiens	CYP26B1		R-HSA-212007	https://reactome.org/PathwayBrowser/#/R-HSA-211897
R-HSA-8951664	Neddylation	2	241	0.0163712	0.9998	0.9998	7	31	0.00234334	9606	Homo sapiens	CUL9;KLHL11		R-HSA-8956040;R-HSA-8955289;R-HSA-8955241;R-HSA-8956025;R-HSA-8956026;R-HSA-8956031;R-HSA-8956050	https://reactome.org/PathwayBrowser/#/R-HSA-8951664
R-HSA-72312	rRNA processing	2	245	0.0166429	0.999831	0.999831	6	21	0.00158742	9606	Homo sapiens	GNL3L;SNORD3A		R-HSA-6791222;R-HSA-6791221;R-HSA-6791218;R-HSA-6791228;R-HSA-6791227;R-HSA-6790906	https://reactome.org/PathwayBrowser/#/R-HSA-72312
R-HSA-68882	Mitotic Anaphase	2	249	0.0169146	0.999857	0.999857	7	32	0.00241893	9606	Homo sapiens	TUBA1A;PLEKHG5		R-HSA-9668419;R-HSA-2467809;R-HSA-9668389;R-HSA-9668405;R-HSA-2467811;R-HSA-9668395;R-HSA-9668415	https://reactome.org/PathwayBrowser/#/R-HSA-68882
R-HSA-2467813	Separation of Sister Chromatids	1	195	0.0132464	0.999863	0.999863	2	8	0.000604732	9606	Homo sapiens	TUBA1A		R-HSA-2467809;R-HSA-2467811	https://reactome.org/PathwayBrowser/#/R-HSA-2467813
R-HSA-2555396	Mitotic Metaphase and Anaphase	2	250	0.0169825	0.999863	0.999863	7	33	0.00249452	9606	Homo sapiens	TUBA1A;PLEKHG5		R-HSA-9668419;R-HSA-2467809;R-HSA-9668389;R-HSA-9668405;R-HSA-2467811;R-HSA-9668395;R-HSA-9668415	https://reactome.org/PathwayBrowser/#/R-HSA-2555396
R-HSA-72172	mRNA Splicing	1	196	0.0133143	0.999869	0.999869	2	14	0.00105828	9606	Homo sapiens	ZNF608		R-HSA-72130;R-HSA-72127	https://reactome.org/PathwayBrowser/#/R-HSA-72172
R-HSA-446203	Asparagine N-linked glycosylation	6	421	0.0285986	0.999876	0.999876	23	144	0.0108852	9606	Homo sapiens	SPTBN5;TUBA1A;COL7A1;MAN1C1;ST8SIA5;SPTBN2		R-HSA-6807877;R-HSA-6807875;R-HSA-5694418;R-HSA-203973;R-HSA-5694417;R-HSA-6809006;R-HSA-5694527;R-HSA-204008;R-HSA-4084978;R-HSA-6809003;R-HSA-5694522;R-HSA-5694427;R-HSA-964737;R-HSA-964830;R-HSA-5694439;R-HSA-5694436;R-HSA-6809011;R-HSA-6809010;R-HSA-5694435;R-HSA-964825;R-HSA-5694446;R-HSA-5694441;R-HSA-5694409	https://reactome.org/PathwayBrowser/#/R-HSA-446203
R-HSA-168255	Influenza Infection	1	200	0.013586	0.999891	0.999891	2	59	0.0044599	9606	Homo sapiens	GNL3L		R-HSA-192704;R-HSA-192841	https://reactome.org/PathwayBrowser/#/R-HSA-168255
R-HSA-112316	Neuronal System	8	501	0.034033	0.999901	0.999901	14	216	0.0163278	9606	Homo sapiens	GJC1;KCNF1;CACNB3;TUBA1A;EPB41L1;DLGAP1;KCNAB3;KCNK3		R-HSA-9619542;R-HSA-6794338;R-HSA-1299318;R-HSA-416320;R-HSA-6797568;R-HSA-375330;R-HSA-1296127;R-HSA-6794344;R-HSA-9610627;R-HSA-6794357;R-HSA-6797554;R-HSA-6797553;R-HSA-210420;R-HSA-9610408	https://reactome.org/PathwayBrowser/#/R-HSA-112316
R-HSA-983169	Class I MHC mediated antigen processing & presentation	6	465	0.0315875	0.999974	0.999974	4	48	0.00362839	9606	Homo sapiens	RNF213;HERC2;HERC1;UBR4;KLHL11;HERC6		R-HSA-983147;R-HSA-983157;R-HSA-983156;R-HSA-983140	https://reactome.org/PathwayBrowser/#/R-HSA-983169
R-HSA-1428517	The citric acid (TCA) cycle and respiratory electron transport	1	233	0.0158277	0.999976	0.999976	1	67	0.00506463	9606	Homo sapiens	HOXC9		R-HSA-9011595	https://reactome.org/PathwayBrowser/#/R-HSA-1428517
R-HSA-76002	Platelet activation, signaling and aggregation	2	296	0.0201073	0.999981	0.999981	3	115	0.00869302	9606	Homo sapiens	TMSB4X;ITPR3		R-HSA-139941;R-HSA-481007;R-HSA-139854	https://reactome.org/PathwayBrowser/#/R-HSA-76002
R-HSA-211945	Phase I - Functionalization of compounds	2	299	0.0203111	0.999983	0.999983	2	98	0.00740797	9606	Homo sapiens	CYP26B1;LTBP1		R-HSA-212007;R-HSA-6784959	https://reactome.org/PathwayBrowser/#/R-HSA-211945
R-HSA-112315	Transmission across Chemical Synapses	3	355	0.0241152	0.999987	0.999987	5	163	0.0123214	9606	Homo sapiens	CACNB3;TUBA1A;EPB41L1		R-HSA-9610627;R-HSA-9619542;R-HSA-416320;R-HSA-210420;R-HSA-9610408	https://reactome.org/PathwayBrowser/#/R-HSA-112315
R-HSA-913531	Interferon Signaling	4	401	0.02724	0.999987	0.999987	4	69	0.00521581	9606	Homo sapiens	EGR1;IFIT1		R-HSA-1678841;R-HSA-1015702;R-HSA-1015699;R-HSA-1169406	https://reactome.org/PathwayBrowser/#/R-HSA-913531
R-HSA-196849	Metabolism of water-soluble vitamins and cofactors	1	255	0.0173222	0.999991	0.999991	1	144	0.0108852	9606	Homo sapiens	FMN1		R-HSA-196964	https://reactome.org/PathwayBrowser/#/R-HSA-196849
R-HSA-72203	Processing of Capped Intron-Containing Pre-mRNA	1	256	0.0173901	0.999992	0.999992	2	32	0.00241893	9606	Homo sapiens	ZNF608		R-HSA-72130;R-HSA-72127	https://reactome.org/PathwayBrowser/#/R-HSA-72203
R-HSA-71387	Metabolism of carbohydrates	5	456	0.0309762	0.999992	0.999992	27	243	0.0183687	9606	Homo sapiens	SDC3;IDS;NHLRC1;CHST14;FUT4		R-HSA-2076383;R-HSA-9603984;R-HSA-2076508;R-HSA-1793182;R-HSA-2024084;R-HSA-2076371;R-HSA-2022860;R-HSA-2022856;R-HSA-2022919;R-HSA-2076419;R-HSA-2076611;R-HSA-2022851;R-HSA-1889981;R-HSA-9638064;R-HSA-1678650;R-HSA-1667005;R-HSA-1889978;R-HSA-3781009;R-HSA-1878002;R-HSA-2022063;R-HSA-2024108;R-HSA-2076392;R-HSA-2022887;R-HSA-2024100;R-HSA-3780995;R-HSA-1889955;R-HSA-1678694	https://reactome.org/PathwayBrowser/#/R-HSA-71387
R-HSA-156580	Phase II - Conjugation of compounds	1	259	0.0175939	0.999993	0.999993	1	72	0.00544259	9606	Homo sapiens	HOXC9		R-HSA-176054	https://reactome.org/PathwayBrowser/#/R-HSA-156580
R-HSA-5653656	Vesicle-mediated transport	15	825	0.0560424	0.999993	0.999993	41	252	0.0190491	9606	Homo sapiens	SPTBN5;RALGAPA2;BICD1;BICD2;GJC1;TUBA1A;GJC2;COL7A1;MAN1C1;MYH9;KIF1C;COL9A2;RAB6B;SPTBN2		R-HSA-6811431;R-HSA-8849350;R-HSA-6811429;R-HSA-6811428;R-HSA-8849348;R-HSA-5694418;R-HSA-6811426;R-HSA-203973;R-HSA-5694417;R-HSA-1458463;R-HSA-6809006;R-HSA-6809003;R-HSA-5694427;R-HSA-8849353;R-HSA-6809011;R-HSA-8847635;R-HSA-6809010;R-HSA-190682;R-HSA-8854303;R-HSA-2316347;R-HSA-5694409;R-HSA-190877;R-HSA-3221843;R-HSA-6807877;R-HSA-1458485;R-HSA-2316352;R-HSA-6807875;R-HSA-8876193;R-HSA-5694…	https://reactome.org/PathwayBrowser/#/R-HSA-5653656
R-HSA-418594	G alpha (i) signalling events	7	565	0.0383805	0.999997	0.999997	25	165	0.0124726	9606	Homo sapiens	GNAO1;RGS19;RGS9BP;ABCA3;SDC3;ITPR3;SSTR3		R-HSA-749454;R-HSA-111879;R-HSA-2404131;R-HSA-167429;R-HSA-8982019;R-HSA-167433;R-HSA-2423785;R-HSA-8982020;R-HSA-112271;R-HSA-2584246;R-HSA-169683;R-HSA-392212;R-HSA-169680;R-HSA-2466749;R-HSA-749456;R-HSA-1467466;R-HSA-112037;R-HSA-380073;R-HSA-2429643;R-HSA-167408;R-HSA-167415;R-HSA-8982012;R-HSA-74615;R-HSA-167419;R-HSA-111870	https://reactome.org/PathwayBrowser/#/R-HSA-418594
R-HSA-5619115	Disorders of transmembrane transporters	1	280	0.0190204	0.999997	0.999997	1	87	0.00657646	9606	Homo sapiens	ABCA3		R-HSA-5683672	https://reactome.org/PathwayBrowser/#/R-HSA-5619115
R-HSA-3700989	Transcriptional Regulation by TP53	5	486	0.0330141	0.999997	0.999997	11	259	0.0195782	9606	Homo sapiens	MAPK11;DYRK3;CDKN2A;LRRC49;TNRC6B		R-HSA-6804998;R-HSA-6798374;R-HSA-6801109;R-HSA-6804996;R-HSA-6798372;R-HSA-2318752;R-HSA-2321904;R-HSA-6801089;R-HSA-3239014;R-HSA-6804879;R-HSA-6801101	https://reactome.org/PathwayBrowser/#/R-HSA-3700989
R-HSA-449147	Signaling by Interleukins	9	647	0.0439508	0.999998	0.999998	13	493	0.0372666	9606	Homo sapiens	SOX2;IL11;MAPK11;DYRK3;CTF1;FOXO3B;HIST1H3B		R-HSA-449829;R-HSA-6783524;R-HSA-450222;R-HSA-8865711;R-HSA-8865613;R-HSA-198669;R-HSA-199917;R-HSA-6790036;R-HSA-5696482;R-HSA-168053;R-HSA-450257;R-HSA-450333;R-HSA-449976	https://reactome.org/PathwayBrowser/#/R-HSA-449147
R-HSA-196854	Metabolism of vitamins and cofactors	2	383	0.0260173	1	1	4	206	0.0155718	9606	Homo sapiens	SDC3;FMN1		R-HSA-196964;R-HSA-2404131;R-HSA-2423785;R-HSA-2429643	https://reactome.org/PathwayBrowser/#/R-HSA-196854
R-HSA-8957322	Metabolism of steroids	1	323	0.0219414	1	1	3	237	0.0179152	9606	Homo sapiens	HELZ2		R-HSA-1655848;R-HSA-1655850;R-HSA-1655826	https://reactome.org/PathwayBrowser/#/R-HSA-8957322
R-HSA-500792	GPCR ligand binding	8	665	0.0451736	1	1	7	185	0.0139844	9606	Homo sapiens	WNT10B;RAMP2;PTGIR;WNT7B;WNT9A;SSTR3;RAMP1;NTSR1		R-HSA-420214;R-HSA-388900;R-HSA-374758;R-HSA-391942;R-HSA-420127;R-HSA-201708;R-HSA-420265	https://reactome.org/PathwayBrowser/#/R-HSA-500792
R-HSA-9679506	SARS-CoV Infections	1	328	0.0222811	1	1	1	255	0.0192758	9606	Homo sapiens	PDCD1		R-HSA-9679421	https://reactome.org/PathwayBrowser/#/R-HSA-9679506
R-HSA-597592	Post-translational protein modification	36	1597	0.108484	1	1	76	526	0.0397611	9606	Homo sapiens	CUL9;SPTBN5;HIST1H2BO;HIST2H2AB;KLHL11;LTBP1;FSTL1;FAM171A2;MUC2;HERC2;TUBA1A;MAN1C1;ST8SIA5;HIST1H2AG;CLSPN;RAB6B;ADAMTS9;SPTBN2;ADAMTS7;CDKN2A;GOLM1;LRRC49;VASH1;HIST2H2BF;HIC1;FMNL1;HIST1H4B;VGF;HIST4H4;COL7A1;POMK;HIST1H4H;MYH9;HIST1H2BG;HIST1H4C;HIST1H4E;HIST1H2BD		R-HSA-8956040;R-HSA-5694418;R-HSA-5173192;R-HSA-913675;R-HSA-5694417;R-HSA-5694427;R-HSA-964737;R-HSA-8955289;R-HSA-5696960;R-HSA-4090281;R-HSA-8956050;R-HSA-8942099;R-HSA-8942101;R-HSA-5694409;R-HSA-977071;R-HSA-6807877;R-HSA-5691381;R-HSA-6807875;R-HSA-8867370;R-HSA-4570485;R-HSA-5694439;R-HSA-5694436;R-HSA-8955706;R-HSA-5694435;R-HSA-5690080;R-HSA-981814;R-HSA-5694446;R-HSA-8870461;R-HSA-67860…	https://reactome.org/PathwayBrowser/#/R-HSA-597592
R-HSA-109582	Hemostasis	12	831	0.05645	1	1	22	333	0.025172	9606	Homo sapiens	PTGIR;TUBA1A;PLAU;ITGA3;MICAL1;ITGA10;TMSB4X;SDC3;KIF1C;ITPR3;L1CAM;HIST1H3B		R-HSA-997263;R-HSA-114563;R-HSA-392870;R-HSA-391942;R-HSA-158982;R-HSA-139941;R-HSA-481007;R-HSA-8870732;R-HSA-139854;R-HSA-158959;R-HSA-983266;R-HSA-158925;R-HSA-392874;R-HSA-204434;R-HSA-392852;R-HSA-8865107;R-HSA-983259;R-HSA-994106;R-HSA-375133;R-HSA-159001;R-HSA-158942;R-HSA-159005	https://reactome.org/PathwayBrowser/#/R-HSA-109582
R-HSA-72766	Translation	1	339	0.0230283	1	1	16	99	0.00748356	9606	Homo sapiens	GNL3L		R-HSA-72673;R-HSA-72672;R-HSA-1799326;R-HSA-141671;R-HSA-156907;R-HSA-141673;R-HSA-156915;R-HSA-156912;R-HSA-156826;R-HSA-156923;R-HSA-1799330;R-HSA-141691;R-HSA-1799329;R-HSA-1799335;R-HSA-72671;R-HSA-1799332	https://reactome.org/PathwayBrowser/#/R-HSA-72766
R-HSA-212436	Generic Transcription Pathway	34	1554	0.105563	1	1	122	824	0.0622874	9606	Homo sapiens	KMT2D;DYRK3;HIST1H2BO;SOX2;CCND2;FOXO3B;HIST1H3B;ZNF587;ZIM2;ZNF221;ZNF583;CDKN2B;ZNF460;CDKN2A;LRRC49;MAPK11;HIST1H4B;HIST4H4;ZNF737;ZNF724P;HIST1H4H;HIST1H2BG;MAML3;ZNF611;HIST1H4C;ZNF852;HIST1H4E;HIST1H2BD;ZNF112;TNRC6B		R-HSA-8936584;R-HSA-8937097;R-HSA-9624976;R-HSA-2187303;R-HSA-9625749;R-HSA-9620891;R-HSA-9623192;R-HSA-9624985;R-HSA-8878220;R-HSA-8936068;R-HSA-8937113;R-HSA-9623427;R-HSA-9623168;R-HSA-8937118;R-HSA-9622667;R-HSA-8878237;R-HSA-9622668;R-HSA-8936599;R-HSA-9615501;R-HSA-8936616;R-HSA-8952232;R-HSA-9620915;R-HSA-9617840;R-HSA-9615536;R-HSA-8878243;R-HSA-8936621;R-HSA-8937134;R-HSA-8853921;R-HSA-8…	https://reactome.org/PathwayBrowser/#/R-HSA-212436
R-HSA-425407	SLC-mediated transmembrane transport	2	418	0.0283948	1	1	2	191	0.014438	9606	Homo sapiens	SLC9A3;SLC4A3;ARHGAP23		R-HSA-425994;R-HSA-425482	https://reactome.org/PathwayBrowser/#/R-HSA-425407
R-HSA-373076	Class A/1 (Rhodopsin-like receptors)	3	475	0.0322668	1	1	3	158	0.0119435	9606	Homo sapiens	PTGIR;SSTR3;NTSR1		R-HSA-388900;R-HSA-374758;R-HSA-391942	https://reactome.org/PathwayBrowser/#/R-HSA-373076
R-HSA-1280218	Adaptive Immune System	16	1003	0.068134	1	1	36	264	0.0199562	9606	Homo sapiens	KLRC2;BTN1A1;UBR4;KLHL11;ITPR3;KLRK1;RNF213;HERC2;TUBA1A;HERC1;NCR3LG1;COL9A2;PDCD1;CARD11;SPTBN2;HERC6		R-HSA-198983;R-HSA-202437;R-HSA-389762;R-HSA-202500;R-HSA-202443;R-HSA-202510;R-HSA-1168641;R-HSA-169683;R-HSA-169680;R-HSA-199062;R-HSA-1168644;R-HSA-202453;R-HSA-202459;R-HSA-388828;R-HSA-202394;R-HSA-202466;R-HSA-2213248;R-HSA-8851044;R-HSA-983147;R-HSA-202534;R-HSA-1168376;R-HSA-1168635;R-HSA-983140;R-HSA-202472;R-HSA-1168637;R-HSA-202478;R-HSA-9679421;R-HSA-5696356;R-HSA-5696357;R-HSA-568560…	https://reactome.org/PathwayBrowser/#/R-HSA-1280218
R-HSA-6798695	Neutrophil degranulation	3	480	0.0326065	1	1	6	10	0.000755915	9606	Homo sapiens	PLAU;QPCT;UBR4		R-HSA-6799350;R-HSA-6800434;R-HSA-6798749;R-HSA-6798747;R-HSA-6800426;R-HSA-6798745	https://reactome.org/PathwayBrowser/#/R-HSA-6798695
R-HSA-5663202	Diseases of signal transduction by growth factor receptors and second messengers	3	529	0.0359351	1	1	13	448	0.033865	9606	Homo sapiens	SPRED3;FOXO3B;MAML3		R-HSA-2220964;R-HSA-2220966;R-HSA-2220971;R-HSA-4396393;R-HSA-4396392;R-HSA-4396402;R-HSA-6802837;R-HSA-4396401;R-HSA-2220979;R-HSA-2220981;R-HSA-2220985;R-HSA-2399992;R-HSA-2220957	https://reactome.org/PathwayBrowser/#/R-HSA-5663202
R-HSA-73857	RNA Polymerase II Transcription	35	1693	0.115006	1	1	133	885	0.0668985	9606	Homo sapiens	RNU4-1;KMT2D;DYRK3;HIST1H2BO;SOX2;CCND2;FOXO3B;HIST1H3B;ZNF587;ZIM2;ZNF221;ZNF583;CDKN2B;ZNF460;CDKN2A;LRRC49;MAPK11;HIST1H4B;HIST4H4;ZNF737;ZNF724P;HIST1H4H;HIST1H2BG;MAML3;ZNF611;HIST1H4C;ZNF852;HIST1H4E;HIST1H2BD;ZNF112;TNRC6B		R-HSA-8936584;R-HSA-8937097;R-HSA-9624976;R-HSA-2187303;R-HSA-9625749;R-HSA-9620891;R-HSA-9623192;R-HSA-9624985;R-HSA-8878220;R-HSA-8936068;R-HSA-8937113;R-HSA-9623427;R-HSA-9623168;R-HSA-8937118;R-HSA-6810239;R-HSA-9622667;R-HSA-6810238;R-HSA-8878237;R-HSA-6810235;R-HSA-6810234;R-HSA-9622668;R-HSA-6810233;R-HSA-8936599;R-HSA-9615501;R-HSA-8936616;R-HSA-8952232;R-HSA-9620915;R-HSA-9617840;R-HSA-9…	https://reactome.org/PathwayBrowser/#/R-HSA-73857
R-HSA-211859	Biological oxidations	3	547	0.0371578	1	1	3	188	0.0142112	9606	Homo sapiens	CYP26B1;HOXC9;LTBP1		R-HSA-212007;R-HSA-176054;R-HSA-6784959	https://reactome.org/PathwayBrowser/#/R-HSA-211859
R-HSA-418555	G alpha (s) signalling events	4	602	0.040894	1	1	3	19	0.00143624	9606	Homo sapiens	RAMP2;PTGIR;GPR150;RAMP1		R-HSA-379044;R-HSA-744887;R-HSA-744886	https://reactome.org/PathwayBrowser/#/R-HSA-418555
R-HSA-1280215	Cytokine Signaling in Immune system	15	1108	0.0752666	1	1	31	687	0.0519314	9606	Homo sapiens	SOX2;EGR1;IL11;MAPK11;DYRK3;CTF1;GRB10;FOXO3B;LTB;HIST1H3B;IFIT1		R-HSA-6783524;R-HSA-8865613;R-HSA-198669;R-HSA-9706308;R-HSA-450257;R-HSA-5668481;R-HSA-1015702;R-HSA-450333;R-HSA-1015699;R-HSA-1678841;R-HSA-5668534;R-HSA-9699574;R-HSA-449829;R-HSA-9699575;R-HSA-5668789;R-HSA-5676593;R-HSA-450222;R-HSA-8865711;R-HSA-5668414;R-HSA-199917;R-HSA-9699579;R-HSA-1169406;R-HSA-9706340;R-HSA-5668454;R-HSA-6790036;R-HSA-5696482;R-HSA-168053;R-HSA-5676591;R-HSA-9706344;…	https://reactome.org/PathwayBrowser/#/R-HSA-1280215
R-HSA-71291	Metabolism of amino acids and derivatives	4	661	0.0449018	1	1	6	285	0.0215436	9606	Homo sapiens	GNL3L;ZFHX2;SLC25A21;HOXC9		R-HSA-6814165;R-HSA-71173;R-HSA-372480;R-HSA-2408529;R-HSA-6787757;R-HSA-5333615	https://reactome.org/PathwayBrowser/#/R-HSA-71291
R-HSA-74160	Gene expression (Transcription)	35	1851	0.125739	1	1	158	996	0.0752891	9606	Homo sapiens	RNU4-1;KMT2D;DYRK3;HIST1H2BO;SOX2;CCND2;FOXO3B;HIST1H3B;ZNF587;ZIM2;ZNF221;ZNF583;CDKN2B;ZNF460;CDKN2A;LRRC49;MAPK11;HIST1H4B;HIST4H4;ZNF737;ZNF724P;HIST1H4H;HIST1H2BG;MAML3;ZNF611;HIST1H4C;ZNF852;HIST1H4E;HIST1H2BD;ZNF112;TNRC6B		R-HSA-8936584;R-HSA-5334097;R-HSA-8937097;R-HSA-427527;R-HSA-5334099;R-HSA-9624976;R-HSA-2187303;R-HSA-9625749;R-HSA-9620891;R-HSA-9623192;R-HSA-9624985;R-HSA-8878220;R-HSA-8936068;R-HSA-433672;R-HSA-427528;R-HSA-8937113;R-HSA-9623427;R-HSA-9623168;R-HSA-8937118;R-HSA-6810239;R-HSA-9622667;R-HSA-6810238;R-HSA-8878237;R-HSA-426522;R-HSA-6810235;R-HSA-6810234;R-HSA-9622668;R-HSA-6810233;R-HSA-89365…	https://reactome.org/PathwayBrowser/#/R-HSA-74160
R-HSA-8953854	Metabolism of RNA	5	782	0.0531214	1	1	15	187	0.0141356	9606	Homo sapiens	MAPK11;RPPH1;GNL3L;ZNF608;SNORD3A		R-HSA-72130;R-HSA-927789;R-HSA-927813;R-HSA-6791222;R-HSA-927836;R-HSA-6791221;R-HSA-6791218;R-HSA-451152;R-HSA-927832;R-HSA-6791228;R-HSA-5696810;R-HSA-6791227;R-HSA-6790906;R-HSA-72127;R-HSA-927889	https://reactome.org/PathwayBrowser/#/R-HSA-8953854
R-HSA-5663205	Infectious disease	21	1468	0.0997215	1	1	22	751	0.0567692	9606	Homo sapiens	RAMP2;PTGIR;HIST1H2BO;WIPF3;HIST2H2AB;ITPR3;HIST2H2BF;HIST1H4B;RNF213;TUBA1A;GNL3L;HIST4H4;GPR150;MYH9;HIST1H4H;HIST1H2AG;HIST1H2BG;PDCD1;HIST1H3B;HIST1H4C;RAMP1;HIST1H2BD;HIST1H4E		R-HSA-192704;R-HSA-9621073;R-HSA-9698928;R-HSA-2197698;R-HSA-2029466;R-HSA-442592;R-HSA-9614810;R-HSA-9614811;R-HSA-9666458;R-HSA-9623096;R-HSA-9635609;R-HSA-9660824;R-HSA-192841;R-HSA-9614367;R-HSA-9679421;R-HSA-169683;R-HSA-9663426;R-HSA-9614816;R-HSA-169680;R-HSA-9614343;R-HSA-2197691;R-HSA-2197690	https://reactome.org/PathwayBrowser/#/R-HSA-5663205
R-HSA-382551	Transport of small molecules	7	967	0.0656885	1	1	11	441	0.0333359	9606	Homo sapiens	SLC9A3;ABCA3;CLCNKB;SLC4A3;MEIS3;SLC9B1;ARHGAP23		R-HSA-2744361;R-HSA-9659568;R-HSA-5683714;R-HSA-5333671;R-HSA-2872444;R-HSA-2744242;R-HSA-425994;R-HSA-1467466;R-HSA-425482;R-HSA-2744228;R-HSA-2684901	https://reactome.org/PathwayBrowser/#/R-HSA-382551
R-HSA-388396	GPCR downstream signalling	15	1355	0.0920454	1	1	39	260	0.0196538	9606	Homo sapiens	RAMP2;PTGIR;RGS19;ABCA3;PLEKHG5;SDC3;ITPR3;SSTR3;GNAO1;AKAP13;OBSCN;RGS9BP;GPR150;RAMP1;NTSR1		R-HSA-392133;R-HSA-8982025;R-HSA-749448;R-HSA-8982026;R-HSA-749454;R-HSA-111879;R-HSA-2404131;R-HSA-749452;R-HSA-167429;R-HSA-8982017;R-HSA-8982019;R-HSA-167433;R-HSA-139854;R-HSA-2423785;R-HSA-8982020;R-HSA-112271;R-HSA-418582;R-HSA-2584246;R-HSA-169683;R-HSA-392212;R-HSA-169680;R-HSA-419166;R-HSA-2466749;R-HSA-749456;R-HSA-1467466;R-HSA-379044;R-HSA-112037;R-HSA-139941;R-HSA-380073;R-HSA-379048…	https://reactome.org/PathwayBrowser/#/R-HSA-388396
R-HSA-372790	Signaling by GPCR	18	1497	0.101691	1	1	46	445	0.0336382	9606	Homo sapiens	WNT10B;RAMP2;PTGIR;RGS19;WNT7B;ABCA3;PLEKHG5;SDC3;ITPR3;WNT9A;SSTR3;GNAO1;AKAP13;OBSCN;RGS9BP;GPR150;RAMP1;NTSR1		R-HSA-392133;R-HSA-8982025;R-HSA-749448;R-HSA-391942;R-HSA-8982026;R-HSA-749454;R-HSA-111879;R-HSA-2404131;R-HSA-749452;R-HSA-167429;R-HSA-8982017;R-HSA-8982019;R-HSA-167433;R-HSA-139854;R-HSA-2423785;R-HSA-8982020;R-HSA-112271;R-HSA-418582;R-HSA-2584246;R-HSA-169683;R-HSA-392212;R-HSA-169680;R-HSA-419166;R-HSA-2466749;R-HSA-420127;R-HSA-749456;R-HSA-1467466;R-HSA-379044;R-HSA-388900;R-HSA-374758…	https://reactome.org/PathwayBrowser/#/R-HSA-372790
R-HSA-168249	Innate Immune System	13	1331	0.0904151	1	1	45	701	0.0529896	9606	Homo sapiens	DYRK3;KLRC2;PLEKHG5;WIPF3;UBR4;ITPR3;MAPK11;KLRK1;MUC2;PLAU;QPCT;MYH9;CARD11		R-HSA-2424484;R-HSA-2424486;R-HSA-2424487;R-HSA-8858500;R-HSA-2424480;R-HSA-2730861;R-HSA-2029466;R-HSA-2424482;R-HSA-2730863;R-HSA-1247960;R-HSA-2395439;R-HSA-6800426;R-HSA-198669;R-HSA-6799350;R-HSA-169683;R-HSA-169680;R-HSA-6800434;R-HSA-2730876;R-HSA-2396594;R-HSA-450257;R-HSA-2730864;R-HSA-2197691;R-HSA-450333;R-HSA-2197690;R-HSA-2197698;R-HSA-202534;R-HSA-442592;R-HSA-450222;R-HSA-199917;R-…	https://reactome.org/PathwayBrowser/#/R-HSA-168249
R-HSA-392499	Metabolism of proteins	42	2363	0.160519	1	1	106	892	0.0674276	9606	Homo sapiens	CUL9;SPTBN5;HIST1H2BO;HIST2H2AB;KLHL11;LTBP1;FSTL1;FAM171A2;MUC2;HERC2;TUBA1A;MAN1C1;ST8SIA5;HIST1H2AG;CLSPN;HIST1H3B;RAB6B;ADAMTS9;SPTBN2;ADAMTS7;CDKN2A;GOLM1;PLA2G4B;LRRC49;ABCA3;VASH1;HIST2H2BF;HIC1;GNAO1;FMNL1;HIST1H4B;GNL3L;VGF;HIST4H4;COL7A1;POMK;HIST1H4H;MYH9;HIST1H2BG;HIST1H4C;HIST1H4E;HIST1H2BD		R-HSA-8956040;R-HSA-913675;R-HSA-8850560;R-HSA-8955289;R-HSA-8956050;R-HSA-6807877;R-HSA-6807875;R-HSA-4570485;R-HSA-981814;R-HSA-981809;R-HSA-5694487;R-HSA-977228;R-HSA-5173005;R-HSA-1791071;R-HSA-5691411;R-HSA-977224;R-HSA-389954;R-HSA-389964;R-HSA-4568846;R-HSA-389961;R-HSA-389963;R-HSA-914012;R-HSA-389972;R-HSA-389974;R-HSA-5683714;R-HSA-914008;R-HSA-8955869;R-HSA-914010;R-HSA-389970;R-HSA-91…	https://reactome.org/PathwayBrowser/#/R-HSA-392499
R-HSA-162582	Signal Transduction	69	3423	0.232525	1	1	283	2408	0.182024	9606	Homo sapiens	ARHGAP11B;NRP1;DYRK3;WIPF3;SOX2;AKAP12;SPRED3;AKAP13;CYP26B1;TUBA1A;ARHGAP40;GRB10;FOXO3B;PTGIR;ITGA3;PLEKHG5;ARAP3;TRAF1;WNT9A;IL17RD;SSTR3;OBSCN;VGF;RASA3;HIST4H4;RGS9BP;MYH9;HIST1H2BG;MAML3;HIST1H2BD;KMT2D;RAMP2;SPTBN5;RGS19;HIST1H2BO;SDC3;ITPR3;FSTL1;GPR150;HIST1H3B;NTSR1;SPTBN2;EGR1;WNT10B;CDKN2B;EGR3;EGR4;WNT7B;ABCA3;ARHGAP23;GNAO1;FMNL3;MAPK11;FMNL1;HIST1H4B;COL5A1;CCDC88C;HIST1H4H;COL9A2;…		R-HSA-171011;R-HSA-1606682;R-HSA-2187303;R-HSA-167429;R-HSA-167433;R-HSA-198669;R-HSA-392212;R-HSA-5668932;R-HSA-2197562;R-HSA-2197564;R-HSA-5658231;R-HSA-3769370;R-HSA-9018538;R-HSA-5668978;R-HSA-9620663;R-HSA-9018542;R-HSA-3772434;R-HSA-3772436;R-HSA-1912368;R-HSA-1912364;R-HSA-1912367;R-HSA-1912366;R-HSA-1912363;R-HSA-1912362;R-HSA-3965444;R-HSA-3965447;R-HSA-3965441;R-HSA-1912413;R-HSA-191241…	https://reactome.org/PathwayBrowser/#/R-HSA-162582
R-HSA-556833	Metabolism of lipids	6	1451	0.0985667	1	1	70	947	0.0715852	9606	Homo sapiens	HELZ2;AKAP12;PLA2G4B;PRKD1;NES		R-HSA-1482646;R-HSA-1482900;R-HSA-429698;R-HSA-1482771;R-HSA-1482897;R-HSA-400143;R-HSA-1655826;R-HSA-1989778;R-HSA-1989779;R-HSA-560517;R-HSA-1989776;R-HSA-1989777;R-HSA-1989774;R-HSA-1989775;R-HSA-1989772;R-HSA-1482884;R-HSA-1989773;R-HSA-1989770;R-HSA-1368065;R-HSA-1989771;R-HSA-1989768;R-HSA-1989767;R-HSA-1989764;R-HSA-1482636;R-HSA-1989765;R-HSA-1989762;R-HSA-1989760;R-HSA-1989761;R-HSA-1482…	https://reactome.org/PathwayBrowser/#/R-HSA-556833
R-HSA-168256	Immune System	38	2713	0.184295	1	1	103	1593	0.120417	9606	Homo sapiens	DYRK3;CTF1;WIPF3;UBR4;KLHL11;ITPR3;IFIT1;SOX2;KLRK1;MUC2;RNF213;HERC2;TUBA1A;HERC1;PLAU;NCR3LG1;GRB10;FOXO3B;HIST1H3B;SPTBN2;HERC6;EGR1;IL11;KLRC2;BTN1A1;PLEKHG5;MAPK11;QPCT;MYH9;COL9A2;LTB;PDCD1;CARD11		R-HSA-8858500;R-HSA-202500;R-HSA-2395439;R-HSA-202510;R-HSA-198669;R-HSA-1168641;R-HSA-1168644;R-HSA-450333;R-HSA-449829;R-HSA-202534;R-HSA-8865711;R-HSA-2395412;R-HSA-5668454;R-HSA-5696356;R-HSA-5696357;R-HSA-5685602;R-HSA-8938431;R-HSA-6783524;R-HSA-198983;R-HSA-2730861;R-HSA-2730863;R-HSA-6800426;R-HSA-6800434;R-HSA-2730876;R-HSA-2730864;R-HSA-9699574;R-HSA-9699575;R-HSA-983147;R-HSA-5676593;R…	https://reactome.org/PathwayBrowser/#/R-HSA-168256
R-HSA-1430728	Metabolism	20	3658	0.248489	1	1	117	2247	0.169854	9606	Homo sapiens	ZFHX2;PLA2G4B;SDC3;ITPR3;FMN1;LTBP1;FUT4;HELZ2;AKAP12;CACNB3;CYP26B1;GNL3L;IDS;NHLRC1;SLC25A21;CHST14;PRKD1;HOXC9;NES		R-HSA-9011595;R-HSA-9603984;R-HSA-71173;R-HSA-1482771;R-HSA-372480;R-HSA-2404131;R-HSA-400143;R-HSA-1655826;R-HSA-1368065;R-HSA-2022919;R-HSA-2076419;R-HSA-9638064;R-HSA-1678650;R-HSA-212007;R-HSA-1482547;R-HSA-1676082;R-HSA-1655848;R-HSA-1655850;R-HSA-1482533;R-HSA-1675810;R-HSA-5333615;R-HSA-2076508;R-HSA-1482847;R-HSA-560473;R-HSA-1482828;R-HSA-1482825;R-HSA-1989758;R-HSA-1989759;R-HSA-879724;…	https://reactome.org/PathwayBrowser/#/R-HSA-1430728
R-HSA-1643685	Disease	37	2538	0.172407	1	1	69	1589	0.120115	9606	Homo sapiens	RAMP2;HIST1H2BO;WIPF3;SDC3;HIST2H2AB;ITPR3;SPRED3;CYP26B1;MUC2;CCND2;RNF213;TUBA1A;GPR150;IDS;HIST1H2AG;FOXO3B;CHST14;HIST1H3B;ADAMTS9;ADAMTS7;PTGIR;CDKN2A;ABCA3;HIST2H2BF;HIST1H4B;GNL3L;HIST4H4;HIST1H4H;MYH9;NHLRC1;HIST1H2BG;PDCD1;MAML3;HIST1H4C;RAMP1;HIST1H4E;HIST1H2BD		R-HSA-3636919;R-HSA-2029466;R-HSA-2220964;R-HSA-9036046;R-HSA-2220966;R-HSA-9036289;R-HSA-3656254;R-HSA-9666458;R-HSA-9635609;R-HSA-2220971;R-HSA-9660824;R-HSA-9036290;R-HSA-9614367;R-HSA-5683672;R-HSA-2220979;R-HSA-6785524;R-HSA-5096537;R-HSA-2220981;R-HSA-9614343;R-HSA-9659782;R-HSA-2220985;R-HSA-5096532;R-HSA-8870686;R-HSA-8870558;R-HSA-2197691;R-HSA-5688397;R-HSA-2197690;R-HSA-8870703;R-HSA-9…	https://reactome.org/PathwayBrowser/#/R-HSA-1643685
