# Supplementary material for: PAIP1 regulates expression of immune and inflammatory response associated genes at transcript level in liver cancer cell
Source: PeerJ. 2023 Apr 21;11:e15070. doi: 10.7717/peerj.15070 (PMC10124545; doi:10.7717/peerj.15070)
Supplement: Supplemental Information 10 [file peerj-11-15070-s010.xlsx]

## Sheet: Table S9
Table S10 Reactome pathways of PAIP1-knockdown downregulated genes
Pathway identifier	Pathway name	#Entities found	#Entities total	Entities ratio	Entities pValue	Entities FDR	#Reactions found	#Reactions total	Reactions ratio	Species identifier	Species name	Submitted entities found	Mapped entities	Found reaction identifiers	PathwayBrowser
R-HSA-6783783	Interleukin-10 signaling	9	86	0.00584199	8.53207e-05	0.0486328	3	15	0.00113387	9606	Homo sapiens	IL1RN;IL1R2;PTAFR;IL18;CCL26		R-HSA-8937656;R-HSA-6784160;R-HSA-8937654	https://reactome.org/PathwayBrowser/#/R-HSA-6783783
R-HSA-449147	Signaling by Interleukins	27	647	0.0439508	0.00042075	0.119914	93	493	0.0372666	9606	Homo sapiens	IL1RN;SERPINB2;IL1R2;PTAFR;EBI3;IL18;IL1RAP;IL22RA1;SOCS3;CCND1;LCK;IL23A;LCP1;LGALS9;CCL26		R-HSA-8950537;R-HSA-452100;R-HSA-6789615;R-HSA-446862;R-HSA-8984963;R-HSA-6797293;R-HSA-1112602;R-HSA-8848395;R-HSA-8950405;R-HSA-8987012;R-HSA-8848392;R-HSA-8987014;R-HSA-8987161;R-HSA-8983835;R-HSA-8950426;R-HSA-446868;R-HSA-8983834;R-HSA-9005340;R-HSA-447130;R-HSA-8950441;R-HSA-448421;R-HSA-1112755;R-HSA-449058;R-HSA-8952749;R-HSA-8983983;R-HSA-8983841;R-HSA-446894;R-HSA-8987043;R-HSA-8987042;…	https://reactome.org/PathwayBrowser/#/R-HSA-449147
R-HSA-9012546	Interleukin-18 signaling	3	11	0.000747232	0.00159013	0.302124	4	4	0.000302366	9606	Homo sapiens	IL18		R-HSA-8848370;R-HSA-6797293;R-HSA-8848395;R-HSA-8848392	https://reactome.org/PathwayBrowser/#/R-HSA-9012546
R-HSA-9615017	FOXO-mediated transcription of oxidative stress, metabolic and neuronal genes	5	49	0.00332858	0.00361243	0.431327	7	34	0.00257011	9606	Homo sapiens	IGFBP1;G6PC;PPARGC1A		R-HSA-9623427;R-HSA-9623168;R-HSA-9623280;R-HSA-9623281;R-HSA-9623415;R-HSA-9623192;R-HSA-9623240	https://reactome.org/PathwayBrowser/#/R-HSA-9615017
R-HSA-447115	Interleukin-12 family signaling	7	96	0.0065213	0.00395803	0.431327	46	114	0.00861743	9606	Homo sapiens	SERPINB2;IL23A;EBI3;LCP1		R-HSA-8950537;R-HSA-8984012;R-HSA-8984014;R-HSA-8984001;R-HSA-8983872;R-HSA-8950210;R-HSA-8984963;R-HSA-8950340;R-HSA-8950405;R-HSA-8983876;R-HSA-8950342;R-HSA-8983878;R-HSA-8983835;R-HSA-8950362;R-HSA-8950426;R-HSA-6809140;R-HSA-8983834;R-HSA-8950364;R-HSA-8983519;R-HSA-8983518;R-HSA-8984021;R-HSA-8950740;R-HSA-447130;R-HSA-8950485;R-HSA-8950741;R-HSA-8984023;R-HSA-8950441;R-HSA-448421;R-HSA-895…	https://reactome.org/PathwayBrowser/#/R-HSA-447115
R-HSA-193144	Estrogen biosynthesis	3	16	0.00108688	0.00454028	0.431327	4	7	0.000529141	9606	Homo sapiens	AKR1B10;AKR1B15;HSD17B2;CYP19A1		R-HSA-5696822;R-HSA-193143;R-HSA-193060;R-HSA-8862137	https://reactome.org/PathwayBrowser/#/R-HSA-193144
R-HSA-8849474	PTK6 Activates STAT3	2	7	0.000475511	0.00929079	0.568072	3	9	0.000680324	9606	Homo sapiens	SOCS3		R-HSA-8848150;R-HSA-8848178;R-HSA-8848110	https://reactome.org/PathwayBrowser/#/R-HSA-8849474
R-HSA-174824	Plasma lipoprotein assembly, remodeling, and clearance	6	98	0.00665716	0.0163396	0.568072	22	84	0.00634969	9606	Homo sapiens	LIPC;CREB3L3;MTTP;APOC3;ANGPTL4;VLDLR		R-HSA-8855111;R-HSA-174690;R-HSA-174786;R-HSA-8854628;R-HSA-174657;R-HSA-6784676;R-HSA-174660;R-HSA-174757;R-HSA-6784622;R-HSA-5694109;R-HSA-6784620;R-HSA-6784648;R-HSA-6784628;R-HSA-174741;R-HSA-8854462;R-HSA-6785181;R-HSA-6785213;R-HSA-266303;R-HSA-8855131;R-HSA-8855130;R-HSA-6785178;R-HSA-8866329	https://reactome.org/PathwayBrowser/#/R-HSA-174824
R-HSA-888593	Reuptake of GABA	2	10	0.000679302	0.0182165	0.568072	2	2	0.000151183	9606	Homo sapiens	SLC6A12		R-HSA-444007;R-HSA-352029	https://reactome.org/PathwayBrowser/#/R-HSA-888593
R-HSA-8949275	RUNX3 Regulates Immune Response and Cell Migration	2	10	0.000679302	0.0182165	0.568072	2	5	0.000377958	9606	Homo sapiens	ITGAL		R-HSA-8949343;R-HSA-8949335	https://reactome.org/PathwayBrowser/#/R-HSA-8949275
R-HSA-8951430	RUNX3 regulates WNT signaling	2	10	0.000679302	0.0182165	0.568072	2	5	0.000377958	9606	Homo sapiens	CCND1		R-HSA-8951442;R-HSA-8951443	https://reactome.org/PathwayBrowser/#/R-HSA-8951430
R-HSA-442660	Na+/Cl- dependent neurotransmitter transporters	4	50	0.00339651	0.0201739	0.568072	4	15	0.00113387	9606	Homo sapiens	SLC6A9;SIT1;SLC6A12		R-HSA-352052;R-HSA-444007;R-HSA-352029;R-HSA-444120	https://reactome.org/PathwayBrowser/#/R-HSA-442660
R-HSA-425366	Transport of bile salts and organic acids, metal ions and amine compounds	8	165	0.0112085	0.0214867	0.568072	10	67	0.00506463	9606	Homo sapiens	PIWIL2;SLC6A9;SIT1;SLC40A1;SLC5A11;SLC6A12;SLC22A7		R-HSA-352052;R-HSA-444007;R-HSA-904830;R-HSA-429571;R-HSA-442368;R-HSA-352029;R-HSA-561041;R-HSA-561059;R-HSA-433101;R-HSA-444120	https://reactome.org/PathwayBrowser/#/R-HSA-425366
R-HSA-8939242	RUNX1 regulates transcription of genes involved in differentiation of keratinocytes	2	11	0.000747232	0.0217506	0.568072	2	8	0.000604732	9606	Homo sapiens	SOCS3		R-HSA-8955885;R-HSA-8955748	https://reactome.org/PathwayBrowser/#/R-HSA-8939242
R-HSA-8854691	Interleukin-20 family signaling	3	29	0.00196997	0.022291	0.568072	16	56	0.00423312	9606	Homo sapiens	IL22RA1;SOCS3		R-HSA-9009227;R-HSA-448708;R-HSA-448480;R-HSA-8987043;R-HSA-8987042;R-HSA-8987012;R-HSA-8987236;R-HSA-8987014;R-HSA-8987161;R-HSA-8987096;R-HSA-8854645;R-HSA-8987132;R-HSA-9005340;R-HSA-8987070;R-HSA-8986995;R-HSA-8987063	https://reactome.org/PathwayBrowser/#/R-HSA-8854691
R-HSA-211999	CYP2E1 reactions	3	30	0.00203791	0.0243166	0.568072	6	6	0.000453549	9606	Homo sapiens	CYP2B6;CYP2D6;CYP2E1		R-HSA-76416;R-HSA-76354;R-HSA-76434;R-HSA-76475;R-HSA-76397;R-HSA-143468	https://reactome.org/PathwayBrowser/#/R-HSA-211999
R-HSA-8963889	Assembly of active LPL and LIPC lipase complexes	3	30	0.00203791	0.0243166	0.568072	9	12	0.000907098	9606	Homo sapiens	LIPC;CREB3L3;ANGPTL4		R-HSA-6784676;R-HSA-6784628;R-HSA-6784622;R-HSA-6785181;R-HSA-6785213;R-HSA-5694109;R-HSA-6784620;R-HSA-6785178;R-HSA-6784648	https://reactome.org/PathwayBrowser/#/R-HSA-8963889
R-HSA-8963899	Plasma lipoprotein remodeling	4	54	0.00366823	0.0257895	0.568072	12	30	0.00226775	9606	Homo sapiens	LIPC;CREB3L3;APOC3;ANGPTL4		R-HSA-174690;R-HSA-6784676;R-HSA-6784628;R-HSA-174757;R-HSA-6784622;R-HSA-6785181;R-HSA-6785213;R-HSA-266303;R-HSA-5694109;R-HSA-6784620;R-HSA-6785178;R-HSA-6784648	https://reactome.org/PathwayBrowser/#/R-HSA-8963899
R-HSA-1280215	Cytokine Signaling in Immune system	32	1108	0.0752666	0.0313177	0.568072	112	687	0.0519314	9606	Homo sapiens	IL1RN;SERPINB2;TNFSF14;IL1R2;PTAFR;EBI3;IL18;IL1RAP;IL22RA1;SOCS3;CCND1;LCK;IL23A;LCP1;LGALS9;GBP2;TRIM22;CCL26		R-HSA-452100;R-HSA-8984963;R-HSA-1112602;R-HSA-8950405;R-HSA-8987012;R-HSA-8987014;R-HSA-8950426;R-HSA-8950441;R-HSA-449058;R-HSA-8952749;R-HSA-912680;R-HSA-8983983;R-HSA-8987043;R-HSA-1031716;R-HSA-8987042;R-HSA-1031713;R-HSA-8950183;R-HSA-8937656;R-HSA-5668454;R-HSA-8983996;R-HSA-8987070;R-HSA-445757;R-HSA-8950453;R-HSA-8848314;R-HSA-8937654;R-HSA-445752;R-HSA-8987063;R-HSA-8984012;R-HSA-898401…	https://reactome.org/PathwayBrowser/#/R-HSA-1280215
R-HSA-193807	Synthesis of bile acids and bile salts via 27-hydroxycholesterol	3	34	0.00230963	0.0333779	0.568072	2	12	0.000907098	9606	Homo sapiens	AKR1C1;AKR1C2		R-HSA-193841;R-HSA-193800	https://reactome.org/PathwayBrowser/#/R-HSA-193807
R-HSA-8963888	Chylomicron assembly	2	14	0.000951022	0.0338586	0.568072	3	5	0.000377958	9606	Homo sapiens	MTTP;APOC3		R-HSA-174786;R-HSA-174660;R-HSA-174741	https://reactome.org/PathwayBrowser/#/R-HSA-8963888
R-HSA-75205	Dissolution of Fibrin Clot	2	14	0.000951022	0.0338586	0.568072	2	19	0.00143624	9606	Homo sapiens	SERPINB2;SERPINF2		R-HSA-159001;R-HSA-158893	https://reactome.org/PathwayBrowser/#/R-HSA-75205
R-HSA-114294	Activation, translocation and oligomerization of BAX	1	2	0.00013586	0.0400718	0.568072	4	4	0.000302366	9606	Homo sapiens	DHDH		R-HSA-114275;R-HSA-168849;R-HSA-114264;R-HSA-139917	https://reactome.org/PathwayBrowser/#/R-HSA-114294
R-HSA-5657560	Hereditary fructose intolerance	1	2	0.00013586	0.0400718	0.568072	1	1	7.55915e-05	9606	Homo sapiens	ALDOB		R-HSA-5656438	https://reactome.org/PathwayBrowser/#/R-HSA-5657560
R-HSA-8984722	Interleukin-35 Signalling	2	16	0.00108688	0.0430713	0.568072	24	26	0.00196538	9606	Homo sapiens	EBI3		R-HSA-8984012;R-HSA-8983983;R-HSA-8984014;R-HSA-8983841;R-HSA-8984001;R-HSA-8983872;R-HSA-8984963;R-HSA-8983845;R-HSA-8950405;R-HSA-8983876;R-HSA-8983878;R-HSA-8983835;R-HSA-8950362;R-HSA-6809140;R-HSA-8983834;R-HSA-8983996;R-HSA-448627;R-HSA-8983519;R-HSA-8983870;R-HSA-8983518;R-HSA-8984021;R-HSA-8950740;R-HSA-8950453;R-HSA-8984023	https://reactome.org/PathwayBrowser/#/R-HSA-8984722
R-HSA-196843	Vitamin B2 (riboflavin) metabolism	2	17	0.00115481	0.0479875	0.568072	2	5	0.000377958	9606	Homo sapiens	SLC52A3;ACP5		R-HSA-196950;R-HSA-3165230	https://reactome.org/PathwayBrowser/#/R-HSA-196843
R-HSA-352230	Amino acid transport across the plasma membrane	4	68	0.00461925	0.0522321	0.568072	4	36	0.00272129	9606	Homo sapiens	SLC7A7;SIT1;SLC6A12;SLC7A10		R-HSA-352052;R-HSA-379415;R-HSA-352029;R-HSA-376200	https://reactome.org/PathwayBrowser/#/R-HSA-352230
R-HSA-196071	Metabolism of steroid hormones	4	70	0.00475511	0.0568799	0.568072	8	40	0.00302366	9606	Homo sapiens	AKR1B10;AKR1B15;HSD17B2;CYP19A1;CYP17A1		R-HSA-5696822;R-HSA-193072;R-HSA-193143;R-HSA-193060;R-HSA-193099;R-HSA-193070;R-HSA-193068;R-HSA-8862137	https://reactome.org/PathwayBrowser/#/R-HSA-196071
R-HSA-193775	Synthesis of bile acids and bile salts via 24-hydroxycholesterol	3	43	0.002921	0.0592157	0.568072	2	28	0.00211656	9606	Homo sapiens	AKR1C1;AKR1C2		R-HSA-193781;R-HSA-193758	https://reactome.org/PathwayBrowser/#/R-HSA-193775
R-HSA-5619101	Variant SLC6A20 contributes towards hyperglycinuria (HG) and iminoglycinuria (IG)	1	3	0.000203791	0.0595034	0.568072	1	1	7.55915e-05	9606	Homo sapiens	SIT1		R-HSA-5660694	https://reactome.org/PathwayBrowser/#/R-HSA-5619101
R-HSA-5660686	Variant SLC6A20 contributes towards hyperglycinuria (HG) and iminoglycinuria (IG)	1	3	0.000203791	0.0595034	0.568072	1	1	7.55915e-05	9606	Homo sapiens	SIT1		R-HSA-5660694	https://reactome.org/PathwayBrowser/#/R-HSA-5660686
R-HSA-3274531	Glycogen storage disease type Ia (G6PC)	1	3	0.000203791	0.0595034	0.568072	1	1	7.55915e-05	9606	Homo sapiens	G6PC		R-HSA-3274540	https://reactome.org/PathwayBrowser/#/R-HSA-3274531
R-HSA-9603505	NTRK3 as a dependence receptor	1	3	0.000203791	0.0595034	0.568072	1	4	0.000302366	9606	Homo sapiens	DHDH		R-HSA-9603598	https://reactome.org/PathwayBrowser/#/R-HSA-9603505
R-HSA-8950505	Gene and protein expression by JAK-STAT signaling after Interleukin-12 stimulation	4	73	0.0049589	0.0642536	0.568072	2	36	0.00272129	9606	Homo sapiens	SERPINB2;LCP1		R-HSA-8950426;R-HSA-8950567	https://reactome.org/PathwayBrowser/#/R-HSA-8950505
R-HSA-452723	Transcriptional regulation of pluripotent stem cells	3	45	0.00305686	0.0659303	0.568072	3	35	0.0026457	9606	Homo sapiens	EPHA1;DKK1		R-HSA-480509;R-HSA-2972967;R-HSA-2972977	https://reactome.org/PathwayBrowser/#/R-HSA-452723
R-HSA-211981	Xenobiotics	4	75	0.00509476	0.069434	0.568072	18	22	0.00166301	9606	Homo sapiens	CYP2B6;CYP2D6;CYP2E1;CYP3A7		R-HSA-76416;R-HSA-76354;R-HSA-76453;R-HSA-211910;R-HSA-212005;R-HSA-76456;R-HSA-211882;R-HSA-211881;R-HSA-76397;R-HSA-143468;R-HSA-211948;R-HSA-76434;R-HSA-211991;R-HSA-213175;R-HSA-211988;R-HSA-76475;R-HSA-211929;R-HSA-211966	https://reactome.org/PathwayBrowser/#/R-HSA-211981
R-HSA-9027307	Biosynthesis of maresin-like SPMs	2	21	0.00142653	0.0694865	0.568072	3	7	0.000529141	9606	Homo sapiens	CYP2D6;CYP2E1		R-HSA-9027321;R-HSA-9027043;R-HSA-9027302	https://reactome.org/PathwayBrowser/#/R-HSA-9027307
R-HSA-2892247	POU5F1 (OCT4), SOX2, NANOG activate genes related to proliferation	2	21	0.00142653	0.0694865	0.568072	2	16	0.00120946	9606	Homo sapiens	EPHA1		R-HSA-480509;R-HSA-2972967	https://reactome.org/PathwayBrowser/#/R-HSA-2892247
R-HSA-193368	Synthesis of bile acids and bile salts via 7alpha-hydroxycholesterol	4	76	0.00516269	0.0721026	0.568072	4	39	0.00294807	9606	Homo sapiens	AKR1C1;AKR1C2;BAAT		R-HSA-193491;R-HSA-192160;R-HSA-192036;R-HSA-192312	https://reactome.org/PathwayBrowser/#/R-HSA-193368
R-HSA-190840	Microtubule-dependent trafficking of connexons from Golgi to the plasma membrane	2	22	0.00149446	0.0752733	0.568072	1	2	0.000151183	9606	Homo sapiens	TUBB1;TUBA4B		R-HSA-190520	https://reactome.org/PathwayBrowser/#/R-HSA-190840
R-HSA-164938	Nef-mediates down modulation of cell surface receptors by recruiting them to clathrin adapters	2	22	0.00149446	0.0752733	0.568072	4	15	0.00113387	9606	Homo sapiens	CD8B;LCK		R-HSA-182198;R-HSA-182186;R-HSA-182171;R-HSA-167566	https://reactome.org/PathwayBrowser/#/R-HSA-164938
R-HSA-9614085	FOXO-mediated transcription	5	110	0.00747232	0.0771812	0.568072	7	85	0.00642528	9606	Homo sapiens	IGFBP1;G6PC;PPARGC1A		R-HSA-9623427;R-HSA-9623168;R-HSA-9623280;R-HSA-9623281;R-HSA-9623415;R-HSA-9623192;R-HSA-9623240	https://reactome.org/PathwayBrowser/#/R-HSA-9614085
R-HSA-6785807	Interleukin-4 and Interleukin-13 signaling	8	216	0.0146729	0.0783727	0.568072	4	47	0.0035528	9606	Homo sapiens	SOCS3;CCND1;IL23A;IL18		R-HSA-6790036;R-HSA-6789615;R-HSA-6797293;R-HSA-6790041	https://reactome.org/PathwayBrowser/#/R-HSA-6785807
R-HSA-5655799	Defective SLC40A1 causes hemochromatosis 4 (HFE4) (duodenum)	1	4	0.000271721	0.0785429	0.568072	1	1	7.55915e-05	9606	Homo sapiens	SLC40A1		R-HSA-5655760	https://reactome.org/PathwayBrowser/#/R-HSA-5655799
R-HSA-5619049	Defective SLC40A1 causes hemochromatosis 4 (HFE4) (macrophages)	1	4	0.000271721	0.0785429	0.568072	1	1	7.55915e-05	9606	Homo sapiens	SLC40A1		R-HSA-5655733	https://reactome.org/PathwayBrowser/#/R-HSA-5619049
R-HSA-9014843	Interleukin-33 signaling	1	4	0.000271721	0.0785429	0.568072	1	2	0.000151183	9606	Homo sapiens	IL1RAP		R-HSA-448603	https://reactome.org/PathwayBrowser/#/R-HSA-9014843
R-HSA-975634	Retinoid metabolism and transport	4	79	0.00536648	0.0804169	0.568072	8	28	0.00211656	9606	Homo sapiens	AKR1B10;AKR1C1;APOC3		R-HSA-2404131;R-HSA-2404140;R-HSA-2424254;R-HSA-2395768;R-HSA-2395784;R-HSA-2423785;R-HSA-2429643;R-HSA-2855252	https://reactome.org/PathwayBrowser/#/R-HSA-975634
R-HSA-190872	Transport of connexons to the plasma membrane	2	23	0.00156239	0.0812072	0.568072	1	3	0.000226775	9606	Homo sapiens	TUBB1;TUBA4B		R-HSA-190520	https://reactome.org/PathwayBrowser/#/R-HSA-190872
R-HSA-389977	Post-chaperonin tubulin folding pathway	2	25	0.00169825	0.093484	0.568072	9	9	0.000680324	9606	Homo sapiens	TUBB1;TUBA4B		R-HSA-389972;R-HSA-389956;R-HSA-389974;R-HSA-389969;R-HSA-389955;R-HSA-389964;R-HSA-389976;R-HSA-389963;R-HSA-389978	https://reactome.org/PathwayBrowser/#/R-HSA-389977
R-HSA-9020591	Interleukin-12 signaling	4	84	0.00570613	0.0952745	0.568072	2	56	0.00423312	9606	Homo sapiens	SERPINB2;LCP1		R-HSA-8950426;R-HSA-8950567	https://reactome.org/PathwayBrowser/#/R-HSA-9020591
R-HSA-1296053	Classical Kir channels	1	5	0.000339651	0.0971982	0.568072	1	1	7.55915e-05	9606	Homo sapiens	TRPV4		R-HSA-1296046	https://reactome.org/PathwayBrowser/#/R-HSA-1296053
R-HSA-5579030	Defective CYP19A1 causes Aromatase excess syndrome (AEXS)	1	5	0.000339651	0.0971982	0.568072	1	1	7.55915e-05	9606	Homo sapiens	CYP19A1		R-HSA-5601849	https://reactome.org/PathwayBrowser/#/R-HSA-5579030
R-HSA-5660862	Defective SLC7A7 causes lysinuric protein intolerance (LPI)	1	5	0.000339651	0.0971982	0.568072	1	1	7.55915e-05	9606	Homo sapiens	SLC7A7		R-HSA-5660910	https://reactome.org/PathwayBrowser/#/R-HSA-5660862
R-HSA-111457	Release of apoptotic factors from the mitochondria	1	5	0.000339651	0.0971982	0.568072	2	4	0.000302366	9606	Homo sapiens	DHDH		R-HSA-114307;R-HSA-114284	https://reactome.org/PathwayBrowser/#/R-HSA-111457
R-HSA-9694614	Attachment and Entry	2	26	0.00176618	0.0998111	0.568072	7	12	0.000907098	9606	Homo sapiens	ACE2;TMPRSS2		R-HSA-9694579;R-HSA-9694661;R-HSA-9681514;R-HSA-9699007;R-HSA-9697423;R-HSA-9694287;R-HSA-9698988	https://reactome.org/PathwayBrowser/#/R-HSA-9694614
R-HSA-210991	Basigin interactions	2	26	0.00176618	0.0998111	0.568072	1	10	0.000755915	9606	Homo sapiens	SLC7A7;SLC7A10		R-HSA-375131	https://reactome.org/PathwayBrowser/#/R-HSA-210991
R-HSA-1307965	betaKlotho-mediated ligand binding	1	6	0.000407581	0.115477	0.568072	2	2	0.000151183	9606	Homo sapiens	KLB		R-HSA-1307955;R-HSA-1307963	https://reactome.org/PathwayBrowser/#/R-HSA-1307965
R-HSA-5339717	Signaling by LRP5 mutants	1	6	0.000407581	0.115477	0.568072	1	1	7.55915e-05	9606	Homo sapiens	DKK1		R-HSA-5339711	https://reactome.org/PathwayBrowser/#/R-HSA-5339717
R-HSA-5619060	Defective CP causes aceruloplasminemia (ACERULOP)	1	6	0.000407581	0.115477	0.568072	1	1	7.55915e-05	9606	Homo sapiens	SLC40A1		R-HSA-5621402	https://reactome.org/PathwayBrowser/#/R-HSA-5619060
R-HSA-9706374	FLT3 signaling through SRC family kinases	1	6	0.000407581	0.115477	0.568072	1	4	0.000302366	9606	Homo sapiens	LCK		R-HSA-9706312	https://reactome.org/PathwayBrowser/#/R-HSA-9706374
R-HSA-164952	The role of Nef in HIV-1 replication and disease pathogenesis	2	29	0.00196997	0.119458	0.568072	5	20	0.00151183	9606	Homo sapiens	CD8B;LCK		R-HSA-182198;R-HSA-182186;R-HSA-200954;R-HSA-182171;R-HSA-167566	https://reactome.org/PathwayBrowser/#/R-HSA-164952
R-HSA-211935	Fatty acids	2	29	0.00196997	0.119458	0.568072	1	4	0.000302366	9606	Homo sapiens	CYP2B6;CYP2D6		R-HSA-211983	https://reactome.org/PathwayBrowser/#/R-HSA-211935
R-HSA-9018682	Biosynthesis of maresins	2	29	0.00196997	0.119458	0.568072	3	13	0.00098269	9606	Homo sapiens	CYP2D6;CYP2E1		R-HSA-9027321;R-HSA-9027043;R-HSA-9027302	https://reactome.org/PathwayBrowser/#/R-HSA-9018682
R-HSA-9634638	Estrogen-dependent nuclear events downstream of ESR-membrane signaling	2	29	0.00196997	0.119458	0.568072	2	12	0.000907098	9606	Homo sapiens	CCND1		R-HSA-9623355;R-HSA-9623341	https://reactome.org/PathwayBrowser/#/R-HSA-9634638
R-HSA-446652	Interleukin-1 family signaling	6	165	0.0112085	0.125015	0.568072	21	80	0.00604732	9606	Homo sapiens	IL1RN;IL1R2;IL18;IL1RAP		R-HSA-446694;R-HSA-446692;R-HSA-449058;R-HSA-446862;R-HSA-446894;R-HSA-6797293;R-HSA-446701;R-HSA-8848395;R-HSA-446634;R-HSA-8848392;R-HSA-446868;R-HSA-450133;R-HSA-446130;R-HSA-8848370;R-HSA-448703;R-HSA-446684;R-HSA-445757;R-HSA-448603;R-HSA-8848314;R-HSA-445752;R-HSA-446648	https://reactome.org/PathwayBrowser/#/R-HSA-446652
R-HSA-389960	Formation of tubulin folding intermediates by CCT/TriC	2	30	0.00203791	0.126205	0.568072	2	2	0.000151183	9606	Homo sapiens	TUBB1;TUBA4B		R-HSA-389954;R-HSA-389961	https://reactome.org/PathwayBrowser/#/R-HSA-389960
R-HSA-8963898	Plasma lipoprotein assembly	2	30	0.00203791	0.126205	0.568072	4	19	0.00143624	9606	Homo sapiens	MTTP;APOC3		R-HSA-174786;R-HSA-174660;R-HSA-174741;R-HSA-8866329	https://reactome.org/PathwayBrowser/#/R-HSA-8963898
R-HSA-6806667	Metabolism of fat-soluble vitamins	4	94	0.00638544	0.128487	0.568072	8	34	0.00257011	9606	Homo sapiens	AKR1B10;AKR1C1;APOC3		R-HSA-2404131;R-HSA-2404140;R-HSA-2424254;R-HSA-2395768;R-HSA-2395784;R-HSA-2423785;R-HSA-2429643;R-HSA-2855252	https://reactome.org/PathwayBrowser/#/R-HSA-6806667
R-HSA-8866376	Reelin signalling pathway	1	7	0.000475511	0.133387	0.568072	4	4	0.000302366	9606	Homo sapiens	VLDLR		R-HSA-8855237;R-HSA-8854466;R-HSA-8855232;R-HSA-8855259	https://reactome.org/PathwayBrowser/#/R-HSA-8866376
R-HSA-5579028	Defective CYP17A1 causes Adrenal hyperplasia 5 (AH5)	1	7	0.000475511	0.133387	0.568072	3	3	0.000226775	9606	Homo sapiens	CYP17A1		R-HSA-5601843;R-HSA-9035954;R-HSA-9035956	https://reactome.org/PathwayBrowser/#/R-HSA-5579028
R-HSA-3296197	Hydroxycarboxylic acid-binding receptors	1	7	0.000475511	0.133387	0.568072	1	3	0.000226775	9606	Homo sapiens	HCAR3		R-HSA-3296309	https://reactome.org/PathwayBrowser/#/R-HSA-3296197
R-HSA-429593	Inositol transporters	1	7	0.000475511	0.133387	0.568072	1	3	0.000226775	9606	Homo sapiens	SLC5A11		R-HSA-429571	https://reactome.org/PathwayBrowser/#/R-HSA-429593
R-HSA-9014826	Interleukin-36 pathway	1	7	0.000475511	0.133387	0.568072	1	3	0.000226775	9606	Homo sapiens	IL1RAP		R-HSA-8848314	https://reactome.org/PathwayBrowser/#/R-HSA-9014826
R-HSA-182218	Nef Mediated CD8 Down-regulation	1	8	0.000543441	0.150936	0.568072	3	3	0.000226775	9606	Homo sapiens	CD8B		R-HSA-182198;R-HSA-182186;R-HSA-182171	https://reactome.org/PathwayBrowser/#/R-HSA-182218
R-HSA-8849470	PTK6 Regulates Cell Cycle	1	8	0.000543441	0.150936	0.568072	2	2	0.000151183	9606	Homo sapiens	CCND1		R-HSA-8848436;R-HSA-8848414	https://reactome.org/PathwayBrowser/#/R-HSA-8849470
R-HSA-5340588	Signaling by RNF43 mutants	1	8	0.000543441	0.150936	0.568072	1	1	7.55915e-05	9606	Homo sapiens	FZD4		R-HSA-5340587	https://reactome.org/PathwayBrowser/#/R-HSA-5340588
R-HSA-166665	Terminal pathway of complement	1	8	0.000543441	0.150936	0.568072	4	5	0.000377958	9606	Homo sapiens	C8B		R-HSA-173723;R-HSA-173720;R-HSA-173725;R-HSA-173709	https://reactome.org/PathwayBrowser/#/R-HSA-166665
R-HSA-448706	Interleukin-1 processing	1	8	0.000543441	0.150936	0.568072	2	5	0.000377958	9606	Homo sapiens	IL18		R-HSA-449058;R-HSA-448703	https://reactome.org/PathwayBrowser/#/R-HSA-448706
R-HSA-9619483	Activation of AMPK downstream of NMDARs	2	34	0.00230963	0.154015	0.568072	1	3	0.000226775	9606	Homo sapiens	TUBB1;TUBA4B		R-HSA-9619542	https://reactome.org/PathwayBrowser/#/R-HSA-9619483
R-HSA-380994	ATF4 activates genes in response to endoplasmic reticulum stress	2	34	0.00230963	0.154015	0.568072	1	7	0.000529141	9606	Homo sapiens	IGFBP1		R-HSA-1791180	https://reactome.org/PathwayBrowser/#/R-HSA-380994
R-HSA-9033241	Peroxisomal protein import	3	67	0.00455132	0.158944	0.568072	3	26	0.00196538	9606	Homo sapiens	DAO;HAO1;BAAT		R-HSA-9033233;R-HSA-9033235;R-HSA-9033236	https://reactome.org/PathwayBrowser/#/R-HSA-9033241
R-HSA-2022090	Assembly of collagen fibrils and other multimeric structures	3	67	0.00455132	0.158944	0.568072	2	26	0.00196538	9606	Homo sapiens	MMP7;PCOLCE;CTSS		R-HSA-2213200;R-HSA-2022141	https://reactome.org/PathwayBrowser/#/R-HSA-2022090
R-HSA-3595174	Defective CHST14 causes EDS, musculocontractural type	1	9	0.000611372	0.16813	0.568072	1	1	7.55915e-05	9606	Homo sapiens	BCAN		R-HSA-3636919	https://reactome.org/PathwayBrowser/#/R-HSA-3595174
R-HSA-3595172	Defective CHST3 causes SEDCJD	1	9	0.000611372	0.16813	0.568072	1	1	7.55915e-05	9606	Homo sapiens	BCAN		R-HSA-3595175	https://reactome.org/PathwayBrowser/#/R-HSA-3595172
R-HSA-350864	Regulation of thyroid hormone activity	1	9	0.000611372	0.16813	0.568072	1	2	0.000151183	9606	Homo sapiens	DIO1		R-HSA-209772	https://reactome.org/PathwayBrowser/#/R-HSA-350864
R-HSA-8964026	Chylomicron clearance	1	9	0.000611372	0.16813	0.568072	1	4	0.000302366	9606	Homo sapiens	LIPC		R-HSA-174657	https://reactome.org/PathwayBrowser/#/R-HSA-8964026
R-HSA-8866423	VLDL assembly	1	9	0.000611372	0.16813	0.568072	1	5	0.000377958	9606	Homo sapiens	MTTP		R-HSA-8866329	https://reactome.org/PathwayBrowser/#/R-HSA-8866423
R-HSA-164944	Nef and signal transduction	1	9	0.000611372	0.16813	0.568072	1	5	0.000377958	9606	Homo sapiens	LCK		R-HSA-200954	https://reactome.org/PathwayBrowser/#/R-HSA-164944
R-HSA-433137	Sodium-coupled sulphate, di- and tri-carboxylate transporters	1	9	0.000611372	0.16813	0.568072	1	5	0.000377958	9606	Homo sapiens	PIWIL2		R-HSA-433101	https://reactome.org/PathwayBrowser/#/R-HSA-433137
R-HSA-8874211	CREB3 factors activate genes	1	9	0.000611372	0.16813	0.568072	4	21	0.00158742	9606	Homo sapiens	CREB3L3		R-HSA-8874208;R-HSA-8874206;R-HSA-8874202;R-HSA-8874201	https://reactome.org/PathwayBrowser/#/R-HSA-8874211
R-HSA-159763	Transport of gamma-carboxylated protein precursors from the endoplasmic reticulum to the Golgi apparatus	1	9	0.000611372	0.16813	0.568072	1	9	0.000680324	9606	Homo sapiens	PROZ		R-HSA-163825	https://reactome.org/PathwayBrowser/#/R-HSA-159763
R-HSA-888590	GABA synthesis, release, reuptake and degradation	2	36	0.00244549	0.168328	0.568072	2	10	0.000755915	9606	Homo sapiens	SLC6A12		R-HSA-444007;R-HSA-352029	https://reactome.org/PathwayBrowser/#/R-HSA-888590
R-HSA-5626467	RHO GTPases activate IQGAPs	2	36	0.00244549	0.168328	0.568072	1	5	0.000377958	9606	Homo sapiens	TUBB1;TUBA4B		R-HSA-5672329	https://reactome.org/PathwayBrowser/#/R-HSA-5626467
R-HSA-389958	Cooperation of Prefoldin and TriC/CCT in actin and tubulin folding	2	37	0.00251342	0.175568	0.568072	4	6	0.000453549	9606	Homo sapiens	TUBB1;TUBA4B		R-HSA-389954;R-HSA-389970;R-HSA-389980;R-HSA-389961	https://reactome.org/PathwayBrowser/#/R-HSA-389958
R-HSA-5694530	Cargo concentration in the ER	2	37	0.00251342	0.175568	0.568072	3	12	0.000907098	9606	Homo sapiens	CTSZ;FOLR1		R-HSA-5694428;R-HSA-5694522;R-HSA-5694410	https://reactome.org/PathwayBrowser/#/R-HSA-5694530
R-HSA-8848021	Signaling by PTK6	3	71	0.00482304	0.178811	0.568072	5	53	0.00400635	9606	Homo sapiens	SOCS3;CCND1		R-HSA-8848150;R-HSA-8848436;R-HSA-8848178;R-HSA-8848110;R-HSA-8848414	https://reactome.org/PathwayBrowser/#/R-HSA-8848021
R-HSA-9006927	Signaling by Non-Receptor Tyrosine Kinases	3	71	0.00482304	0.178811	0.568072	5	53	0.00400635	9606	Homo sapiens	SOCS3;CCND1		R-HSA-8848150;R-HSA-8848436;R-HSA-8848178;R-HSA-8848110;R-HSA-8848414	https://reactome.org/PathwayBrowser/#/R-HSA-9006927
R-HSA-3595177	Defective CHSY1 causes TPBS	1	10	0.000679302	0.184977	0.568072	2	2	0.000151183	9606	Homo sapiens	BCAN		R-HSA-3595178;R-HSA-3595176	https://reactome.org/PathwayBrowser/#/R-HSA-3595177
R-HSA-8964046	VLDL clearance	1	10	0.000679302	0.184977	0.568072	1	3	0.000226775	9606	Homo sapiens	VLDLR		R-HSA-8854462	https://reactome.org/PathwayBrowser/#/R-HSA-8964046
R-HSA-167590	Nef Mediated CD4 Down-regulation	1	10	0.000679302	0.184977	0.568072	1	5	0.000377958	9606	Homo sapiens	LCK		R-HSA-167566	https://reactome.org/PathwayBrowser/#/R-HSA-167590
R-HSA-2892245	POU5F1 (OCT4), SOX2, NANOG repress genes related to differentiation	1	10	0.000679302	0.184977	0.568072	1	7	0.000529141	9606	Homo sapiens	DKK1		R-HSA-2972977	https://reactome.org/PathwayBrowser/#/R-HSA-2892245
R-HSA-159782	Removal of aminoterminal propeptides from gamma-carboxylated proteins	1	10	0.000679302	0.184977	0.568072	1	9	0.000680324	9606	Homo sapiens	PROZ		R-HSA-163798	https://reactome.org/PathwayBrowser/#/R-HSA-159782
R-HSA-1474228	Degradation of the extracellular matrix	5	148	0.0100537	0.188313	0.568072	27	105	0.00793711	9606	Homo sapiens	BCAN;MMP7;ELN;MMP19;CTSS		R-HSA-2514790;R-HSA-4086205;R-HSA-1604763;R-HSA-3791295;R-HSA-1604690;R-HSA-2534248;R-HSA-1454791;R-HSA-1566981;R-HSA-3788075;R-HSA-1566979;R-HSA-3791149;R-HSA-8940561;R-HSA-1604359;R-HSA-1566962;R-HSA-1454781;R-HSA-1592436;R-HSA-1454843;R-HSA-3791319;R-HSA-1604712;R-HSA-1592297;R-HSA-1592362;R-HSA-1454757;R-HSA-2533970;R-HSA-2534160;R-HSA-1564142;R-HSA-2168923;R-HSA-2537499	https://reactome.org/PathwayBrowser/#/R-HSA-1474228
R-HSA-9009391	Extra-nuclear estrogen signaling	4	110	0.00747232	0.189835	0.568072	4	38	0.00287248	9606	Homo sapiens	MMP7;CCND1;HSPB8		R-HSA-9624272;R-HSA-9623355;R-HSA-9021072;R-HSA-9623341	https://reactome.org/PathwayBrowser/#/R-HSA-9009391
R-HSA-5365859	RA biosynthesis pathway	2	39	0.00264928	0.190188	0.568072	2	11	0.000831507	9606	Homo sapiens	AKR1C1;ALDH8A1		R-HSA-5615668;R-HSA-5696101	https://reactome.org/PathwayBrowser/#/R-HSA-5365859
R-HSA-9668328	Sealing of the nuclear envelope (NE) by ESCRT-III	2	39	0.00264928	0.190188	0.568072	1	7	0.000529141	9606	Homo sapiens	TUBB1;TUBA4B		R-HSA-9668419	https://reactome.org/PathwayBrowser/#/R-HSA-9668328
R-HSA-4791275	Signaling by WNT in cancer	2	39	0.00264928	0.190188	0.568072	2	16	0.00120946	9606	Homo sapiens	FZD4;DKK1		R-HSA-5340587;R-HSA-5339711	https://reactome.org/PathwayBrowser/#/R-HSA-4791275
R-HSA-192105	Synthesis of bile acids and bile salts	4	111	0.00754025	0.193946	0.568072	8	83	0.00627409	9606	Homo sapiens	AKR1C1;AKR1C2;BAAT		R-HSA-193491;R-HSA-192160;R-HSA-193841;R-HSA-192036;R-HSA-193781;R-HSA-192312;R-HSA-193800;R-HSA-193758	https://reactome.org/PathwayBrowser/#/R-HSA-192105
R-HSA-1169092	Activation of RAS in B cells	1	11	0.000747232	0.201484	0.568072	2	2	0.000151183	9606	Homo sapiens	RASGRP3		R-HSA-1168374;R-HSA-1168636	https://reactome.org/PathwayBrowser/#/R-HSA-1169092
R-HSA-9020933	Interleukin-23 signaling	1	11	0.000747232	0.201484	0.568072	9	12	0.000907098	9606	Homo sapiens	IL23A		R-HSA-8950364;R-HSA-8950269;R-HSA-8952749;R-HSA-8950591;R-HSA-447130;R-HSA-8950741;R-HSA-8952823;R-HSA-8950583;R-HSA-8950183	https://reactome.org/PathwayBrowser/#/R-HSA-9020933
R-HSA-419812	Calcitonin-like ligand receptors	1	11	0.000747232	0.201484	0.568072	2	4	0.000302366	9606	Homo sapiens	ACE2		R-HSA-420214;R-HSA-420265	https://reactome.org/PathwayBrowser/#/R-HSA-419812
R-HSA-190861	Gap junction assembly	2	41	0.00278514	0.204964	0.568072	3	16	0.00120946	9606	Homo sapiens	TUBB1;TUBA4B		R-HSA-190520;R-HSA-191737;R-HSA-190877	https://reactome.org/PathwayBrowser/#/R-HSA-190861
R-HSA-9678110	Attachment and Entry	2	42	0.00285307	0.212398	0.568072	6	11	0.000831507	9606	Homo sapiens	ACE2;TMPRSS2		R-HSA-9678128;R-HSA-9686711;R-HSA-9695415;R-HSA-9686710;R-HSA-9686731;R-HSA-9681514	https://reactome.org/PathwayBrowser/#/R-HSA-9678110
R-HSA-8964043	Plasma lipoprotein clearance	2	42	0.00285307	0.212398	0.568072	6	35	0.0026457	9606	Homo sapiens	LIPC;VLDLR		R-HSA-8855111;R-HSA-8854628;R-HSA-174657;R-HSA-8854462;R-HSA-8855131;R-HSA-8855130	https://reactome.org/PathwayBrowser/#/R-HSA-8964043
R-HSA-381042	PERK regulates gene expression	2	42	0.00285307	0.212398	0.568072	1	11	0.000831507	9606	Homo sapiens	IGFBP1		R-HSA-1791180	https://reactome.org/PathwayBrowser/#/R-HSA-381042
R-HSA-8866427	VLDLR internalisation and degradation	1	12	0.000815162	0.217658	0.568072	4	4	0.000302366	9606	Homo sapiens	VLDLR		R-HSA-8855111;R-HSA-8854628;R-HSA-8855131;R-HSA-8855130	https://reactome.org/PathwayBrowser/#/R-HSA-8866427
R-HSA-8957322	Metabolism of steroids	9	323	0.0219414	0.219078	0.568072	19	237	0.0179152	9606	Homo sapiens	AKR1B10;AKR1C1;AKR1B15;HSD17B2;AKR1C2;MSMO1;BAAT;CYP19A1;CYP17A1		R-HSA-5696822;R-HSA-192160;R-HSA-159431;R-HSA-192036;R-HSA-193060;R-HSA-193099;R-HSA-193800;R-HSA-193070;R-HSA-193068;R-HSA-194669;R-HSA-193491;R-HSA-193072;R-HSA-194641;R-HSA-193841;R-HSA-193143;R-HSA-193781;R-HSA-192312;R-HSA-193758;R-HSA-8862137	https://reactome.org/PathwayBrowser/#/R-HSA-8957322
R-HSA-8878159	Transcriptional regulation by RUNX3	4	118	0.00801576	0.223447	0.568072	7	47	0.0035528	9606	Homo sapiens	CCND1;ITGAL		R-HSA-8952058;R-HSA-8952062;R-HSA-8949343;R-HSA-8951442;R-HSA-8951443;R-HSA-8952069;R-HSA-8949335	https://reactome.org/PathwayBrowser/#/R-HSA-8878159
R-HSA-2022923	Dermatan sulfate biosynthesis	1	13	0.000883092	0.233506	0.568072	4	4	0.000302366	9606	Homo sapiens	BCAN		R-HSA-2022063;R-HSA-2022061;R-HSA-2022052;R-HSA-2022065	https://reactome.org/PathwayBrowser/#/R-HSA-2022923
R-HSA-2151209	Activation of PPARGC1A (PGC-1alpha) by phosphorylation	1	13	0.000883092	0.233506	0.568072	2	2	0.000151183	9606	Homo sapiens	PPARGC1A		R-HSA-1592233;R-HSA-1592244	https://reactome.org/PathwayBrowser/#/R-HSA-2151209
R-HSA-561048	Organic anion transport	1	13	0.000883092	0.233506	0.568072	2	3	0.000226775	9606	Homo sapiens	SLC22A7		R-HSA-561041;R-HSA-561059	https://reactome.org/PathwayBrowser/#/R-HSA-561048
R-HSA-9020956	Interleukin-27 signaling	1	13	0.000883092	0.233506	0.568072	11	20	0.00151183	9606	Homo sapiens	EBI3		R-HSA-8950441;R-HSA-8950537;R-HSA-448421;R-HSA-8950398;R-HSA-8950210;R-HSA-8950387;R-HSA-8950340;R-HSA-8950485;R-HSA-448427;R-HSA-8950518;R-HSA-8950342	https://reactome.org/PathwayBrowser/#/R-HSA-9020956
R-HSA-390666	Serotonin receptors	1	13	0.000883092	0.233506	0.568072	1	4	0.000302366	9606	Homo sapiens	HTR1D		R-HSA-390929	https://reactome.org/PathwayBrowser/#/R-HSA-390666
R-HSA-2586552	Signaling by Leptin	1	13	0.000883092	0.233506	0.568072	2	19	0.00143624	9606	Homo sapiens	SOCS3		R-HSA-2672302;R-HSA-2586555	https://reactome.org/PathwayBrowser/#/R-HSA-2586552
R-HSA-194068	Bile acid and bile salt metabolism	4	121	0.00821955	0.236435	0.568072	9	94	0.0071056	9606	Homo sapiens	AKR1C1;AKR1C2;BAAT		R-HSA-193491;R-HSA-192160;R-HSA-193841;R-HSA-159431;R-HSA-192036;R-HSA-193781;R-HSA-192312;R-HSA-193800;R-HSA-193758	https://reactome.org/PathwayBrowser/#/R-HSA-194068
R-HSA-1483248	Synthesis of PIPs at the ER membrane	1	14	0.000951022	0.249033	0.568072	1	5	0.000377958	9606	Homo sapiens	SACM1L		R-HSA-1676124	https://reactome.org/PathwayBrowser/#/R-HSA-1483248
R-HSA-210990	PECAM1 interactions	1	14	0.000951022	0.249033	0.568072	1	7	0.000529141	9606	Homo sapiens	LCK		R-HSA-210291	https://reactome.org/PathwayBrowser/#/R-HSA-210990
R-HSA-391908	Prostanoid ligand receptors	1	14	0.000951022	0.249033	0.568072	1	8	0.000604732	9606	Homo sapiens	PTGDR2		R-HSA-391934	https://reactome.org/PathwayBrowser/#/R-HSA-391908
R-HSA-9646399	Aggrephagy	2	47	0.00319272	0.249877	0.568072	4	15	0.00113387	9606	Homo sapiens	TUBB1;TUBA4B		R-HSA-9646679;R-HSA-9646390;R-HSA-9646383;R-HSA-9646685	https://reactome.org/PathwayBrowser/#/R-HSA-9646399
R-HSA-8853884	Transcriptional Regulation by VENTX	2	48	0.00326065	0.257408	0.568072	2	13	0.00098269	9606	Homo sapiens	CCND1		R-HSA-8853956;R-HSA-8853965	https://reactome.org/PathwayBrowser/#/R-HSA-8853884
R-HSA-3000497	Scavenging by Class H Receptors	1	15	0.00101895	0.264247	0.568072	2	4	0.000302366	9606	Homo sapiens	STAB1		R-HSA-2247513;R-HSA-2197770	https://reactome.org/PathwayBrowser/#/R-HSA-3000497
R-HSA-3772470	Negative regulation of TCF-dependent signaling by WNT ligand antagonists	1	15	0.00101895	0.264247	0.568072	2	5	0.000377958	9606	Homo sapiens	DKK1		R-HSA-3769401;R-HSA-5368586	https://reactome.org/PathwayBrowser/#/R-HSA-3772470
R-HSA-159740	Gamma-carboxylation of protein precursors	1	15	0.00101895	0.264247	0.568072	1	9	0.000680324	9606	Homo sapiens	PROZ		R-HSA-163820	https://reactome.org/PathwayBrowser/#/R-HSA-159740
R-HSA-9609736	Assembly and cell surface presentation of NMDA receptors	2	49	0.00332858	0.264942	0.568072	2	23	0.0017386	9606	Homo sapiens	TUBB1;TUBA4B		R-HSA-9610627;R-HSA-9610408	https://reactome.org/PathwayBrowser/#/R-HSA-9609736
R-HSA-877300	Interferon gamma signaling	7	255	0.0173222	0.268675	0.568072	4	16	0.00120946	9606	Homo sapiens	SOCS3;PTAFR;GBP2;TRIM22		R-HSA-873918;R-HSA-877269;R-HSA-1031716;R-HSA-1031713	https://reactome.org/PathwayBrowser/#/R-HSA-877300
R-HSA-8951936	RUNX3 regulates p14-ARF	1	16	0.00108688	0.279154	0.568072	3	8	0.000604732	9606	Homo sapiens	CCND1		R-HSA-8952058;R-HSA-8952062;R-HSA-8952069	https://reactome.org/PathwayBrowser/#/R-HSA-8951936
R-HSA-1679131	Trafficking and processing of endosomal TLR	1	16	0.00108688	0.279154	0.568072	2	7	0.000529141	9606	Homo sapiens	CTSS		R-HSA-1678920;R-HSA-1678981	https://reactome.org/PathwayBrowser/#/R-HSA-1679131
R-HSA-351200	Interconversion of polyamines	1	16	0.00108688	0.279154	0.568072	2	7	0.000529141	9606	Homo sapiens	GBP2		R-HSA-351207;R-HSA-351208	https://reactome.org/PathwayBrowser/#/R-HSA-351200
R-HSA-877312	Regulation of IFNG signaling	1	16	0.00108688	0.279154	0.568072	1	4	0.000302366	9606	Homo sapiens	SOCS3		R-HSA-877269	https://reactome.org/PathwayBrowser/#/R-HSA-877312
R-HSA-159854	Gamma-carboxylation, transport, and amino-terminal cleavage of proteins	1	16	0.00108688	0.279154	0.568072	3	27	0.00204097	9606	Homo sapiens	PROZ		R-HSA-163825;R-HSA-163798;R-HSA-163820	https://reactome.org/PathwayBrowser/#/R-HSA-159854
R-HSA-190828	Gap junction trafficking	2	52	0.00353237	0.287533	0.568072	3	20	0.00151183	9606	Homo sapiens	TUBB1;TUBA4B		R-HSA-190520;R-HSA-191737;R-HSA-190877	https://reactome.org/PathwayBrowser/#/R-HSA-190828
R-HSA-451927	Interleukin-2 family signaling	2	52	0.00353237	0.287533	0.568072	2	59	0.0044599	9606	Homo sapiens	LCK;LGALS9		R-HSA-5340385;R-HSA-452100	https://reactome.org/PathwayBrowser/#/R-HSA-451927
R-HSA-9661069	Defective binding of RB1 mutants to E2F1,(E2F2, E2F3)	1	17	0.00115481	0.29376	0.568072	1	1	7.55915e-05	9606	Homo sapiens	CCND1		R-HSA-9659782	https://reactome.org/PathwayBrowser/#/R-HSA-9661069
R-HSA-389359	CD28 dependent Vav1 pathway	1	17	0.00115481	0.29376	0.568072	5	6	0.000453549	9606	Homo sapiens	LCK		R-HSA-389348;R-HSA-389350;R-HSA-388814;R-HSA-389352;R-HSA-389354	https://reactome.org/PathwayBrowser/#/R-HSA-389359
R-HSA-8963901	Chylomicron remodeling	1	17	0.00115481	0.29376	0.568072	2	3	0.000226775	9606	Homo sapiens	APOC3		R-HSA-174690;R-HSA-174757	https://reactome.org/PathwayBrowser/#/R-HSA-8963901
R-HSA-190322	FGFR4 ligand binding and activation	1	17	0.00115481	0.29376	0.568072	2	4	0.000302366	9606	Homo sapiens	KLB		R-HSA-1307955;R-HSA-1307963	https://reactome.org/PathwayBrowser/#/R-HSA-190322
R-HSA-9659787	Aberrant regulation of mitotic G1/S transition in cancer due to RB1 defects	1	17	0.00115481	0.29376	0.568072	1	2	0.000151183	9606	Homo sapiens	CCND1		R-HSA-9659782	https://reactome.org/PathwayBrowser/#/R-HSA-9659787
R-HSA-5676594	TNF receptor superfamily (TNFSF) members mediating non-canonical NF-kB pathway	1	17	0.00115481	0.29376	0.568072	3	12	0.000907098	9606	Homo sapiens	TNFSF14		R-HSA-5668789;R-HSA-5676593;R-HSA-5676591	https://reactome.org/PathwayBrowser/#/R-HSA-5676594
R-HSA-2022377	Metabolism of Angiotensinogen to Angiotensins	2	53	0.0036003	0.295049	0.568072	3	20	0.00151183	9606	Homo sapiens	ACE2;CTSZ		R-HSA-2022381;R-HSA-2022378;R-HSA-2022379	https://reactome.org/PathwayBrowser/#/R-HSA-2022377
R-HSA-399956	CRMPs in Sema3A signaling	1	18	0.00122274	0.30807	0.568072	4	5	0.000377958	9606	Homo sapiens	ACP5		R-HSA-399951;R-HSA-399946;R-HSA-399931;R-HSA-399944	https://reactome.org/PathwayBrowser/#/R-HSA-399956
R-HSA-418457	cGMP effects	1	18	0.00122274	0.30807	0.568072	3	4	0.000302366	9606	Homo sapiens	PRKG1		R-HSA-418549;R-HSA-418451;R-HSA-418442	https://reactome.org/PathwayBrowser/#/R-HSA-418457
R-HSA-1433559	Regulation of KIT signaling	1	18	0.00122274	0.30807	0.568072	3	8	0.000604732	9606	Homo sapiens	LCK		R-HSA-205319;R-HSA-1433506;R-HSA-205244	https://reactome.org/PathwayBrowser/#/R-HSA-1433559
R-HSA-1059683	Interleukin-6 signaling	1	18	0.00122274	0.30807	0.568072	2	20	0.00151183	9606	Homo sapiens	SOCS3		R-HSA-1112755;R-HSA-1112602	https://reactome.org/PathwayBrowser/#/R-HSA-1059683
R-HSA-8955332	Carboxyterminal post-translational modifications of tubulin	2	55	0.00373616	0.310046	0.568072	6	6	0.000453549	9606	Homo sapiens	TUBB1;TUBA4B		R-HSA-8955706;R-HSA-8955869;R-HSA-8955712;R-HSA-8865774;R-HSA-8867370;R-HSA-8866105	https://reactome.org/PathwayBrowser/#/R-HSA-8955332
R-HSA-437239	Recycling pathway of L1	2	55	0.00373616	0.310046	0.568072	2	14	0.00105828	9606	Homo sapiens	TUBB1;TUBA4B		R-HSA-445077;R-HSA-445071	https://reactome.org/PathwayBrowser/#/R-HSA-437239
R-HSA-6809371	Formation of the cornified envelope	4	138	0.00937436	0.312701	0.568072	9	27	0.00204097	9606	Homo sapiens	KRT7;PRSS8;KRT6A		R-HSA-6810357;R-HSA-8849797;R-HSA-6811539;R-HSA-6814387;R-HSA-8942224;R-HSA-6814734;R-HSA-6814764;R-HSA-6814298;R-HSA-6810937	https://reactome.org/PathwayBrowser/#/R-HSA-6809371
R-HSA-157858	Gap junction trafficking and regulation	2	56	0.00380409	0.317521	0.568072	3	24	0.0018142	9606	Homo sapiens	TUBB1;TUBA4B		R-HSA-190520;R-HSA-191737;R-HSA-190877	https://reactome.org/PathwayBrowser/#/R-HSA-157858
R-HSA-9031628	NGF-stimulated transcription	2	56	0.00380409	0.317521	0.568072	2	37	0.00279689	9606	Homo sapiens	ID2		R-HSA-9612534;R-HSA-9613476	https://reactome.org/PathwayBrowser/#/R-HSA-9031628
R-HSA-5654228	Phospholipase C-mediated cascade; FGFR4	1	19	0.00129067	0.322092	0.568072	3	3	0.000226775	9606	Homo sapiens	KLB		R-HSA-5654151;R-HSA-5654163;R-HSA-5654169	https://reactome.org/PathwayBrowser/#/R-HSA-5654228
R-HSA-399955	SEMA3A-Plexin repulsion signaling by inhibiting Integrin adhesion	1	19	0.00129067	0.322092	0.568072	3	8	0.000604732	9606	Homo sapiens	ACP5		R-HSA-399942;R-HSA-399934;R-HSA-399933	https://reactome.org/PathwayBrowser/#/R-HSA-399955
R-HSA-416700	Other semaphorin interactions	1	19	0.00129067	0.322092	0.568072	1	9	0.000680324	9606	Homo sapiens	ACP5		R-HSA-416725	https://reactome.org/PathwayBrowser/#/R-HSA-416700
R-HSA-9020558	Interleukin-2 signaling	1	19	0.00129067	0.322092	0.568072	1	19	0.00143624	9606	Homo sapiens	LCK		R-HSA-452100	https://reactome.org/PathwayBrowser/#/R-HSA-9020558
R-HSA-373080	Class B/2 (Secretin family receptors)	3	99	0.00672509	0.329908	0.568072	3	20	0.00151183	9606	Homo sapiens	WNT6;ACE2;FZD4		R-HSA-420214;R-HSA-201708;R-HSA-420265	https://reactome.org/PathwayBrowser/#/R-HSA-373080
R-HSA-2162123	Synthesis of Prostaglandins (PG) and Thromboxanes (TX)	2	58	0.00393995	0.332412	0.568072	3	32	0.00241893	9606	Homo sapiens	AKR1C1;PTGES		R-HSA-2161660;R-HSA-2161549;R-HSA-2161614	https://reactome.org/PathwayBrowser/#/R-HSA-2162123
R-HSA-211897	Cytochrome P450 - arranged by substrate type	5	186	0.012635	0.33252	0.568072	21	61	0.00461108	9606	Homo sapiens	CYP2B6;CYP2D6;CYP2E1;CYP19A1;CYP3A7		R-HSA-76416;R-HSA-76354;R-HSA-211968;R-HSA-76453;R-HSA-211910;R-HSA-212005;R-HSA-193060;R-HSA-76456;R-HSA-211882;R-HSA-211881;R-HSA-211983;R-HSA-76397;R-HSA-143468;R-HSA-211948;R-HSA-76434;R-HSA-211991;R-HSA-213175;R-HSA-211988;R-HSA-76475;R-HSA-211929;R-HSA-211966	https://reactome.org/PathwayBrowser/#/R-HSA-211897
R-HSA-5099900	WNT5A-dependent internalization of FZD4	1	20	0.0013586	0.33583	0.568072	5	5	0.000377958	9606	Homo sapiens	FZD4		R-HSA-5138459;R-HSA-5099899;R-HSA-5138441;R-HSA-5138432;R-HSA-5138433	https://reactome.org/PathwayBrowser/#/R-HSA-5099900
R-HSA-5083636	Defective GALNT12 causes colorectal cancer 1 (CRCS1)	1	20	0.0013586	0.33583	0.568072	1	1	7.55915e-05	9606	Homo sapiens	MUC3A		R-HSA-5096532	https://reactome.org/PathwayBrowser/#/R-HSA-5083636
R-HSA-5083625	Defective GALNT3 causes familial hyperphosphatemic tumoral calcinosis (HFTC)	1	20	0.0013586	0.33583	0.568072	1	1	7.55915e-05	9606	Homo sapiens	MUC3A		R-HSA-5096537	https://reactome.org/PathwayBrowser/#/R-HSA-5083625
R-HSA-5576886	Phase 4 - resting membrane potential	1	20	0.0013586	0.33583	0.568072	1	2	0.000151183	9606	Homo sapiens	TRPV4		R-HSA-1296046	https://reactome.org/PathwayBrowser/#/R-HSA-5576886
R-HSA-70350	Fructose catabolism	1	20	0.0013586	0.33583	0.568072	1	5	0.000377958	9606	Homo sapiens	ALDOB		R-HSA-70342	https://reactome.org/PathwayBrowser/#/R-HSA-70350
R-HSA-388844	Receptor-type tyrosine-protein phosphatases	1	20	0.0013586	0.33583	0.568072	1	6	0.000453549	9606	Homo sapiens	IL1RAP		R-HSA-6800380	https://reactome.org/PathwayBrowser/#/R-HSA-388844
R-HSA-111471	Apoptotic factor-mediated response	1	20	0.0013586	0.33583	0.568072	2	28	0.00211656	9606	Homo sapiens	DHDH		R-HSA-114307;R-HSA-114284	https://reactome.org/PathwayBrowser/#/R-HSA-111471
R-HSA-3560783	Defective B4GALT7 causes EDS, progeroid type	1	21	0.00142653	0.349291	0.568072	1	1	7.55915e-05	9606	Homo sapiens	BCAN		R-HSA-3560804	https://reactome.org/PathwayBrowser/#/R-HSA-3560783
R-HSA-4420332	Defective B3GALT6 causes EDSP2 and SEMDJL1	1	21	0.00142653	0.349291	0.568072	1	1	7.55915e-05	9606	Homo sapiens	BCAN		R-HSA-4420365	https://reactome.org/PathwayBrowser/#/R-HSA-4420332
R-HSA-5083632	Defective C1GALT1C1 causes Tn polyagglutination syndrome (TNPS)	1	21	0.00142653	0.349291	0.568072	1	1	7.55915e-05	9606	Homo sapiens	MUC3A		R-HSA-6785524	https://reactome.org/PathwayBrowser/#/R-HSA-5083632
R-HSA-5661270	Formation of xylulose-5-phosphate	1	21	0.00142653	0.349291	0.568072	1	6	0.000453549	9606	Homo sapiens	ACSL6		R-HSA-5661290	https://reactome.org/PathwayBrowser/#/R-HSA-5661270
R-HSA-6804114	TP53 Regulates Transcription of Genes Involved in G2 Cell Cycle Arrest	1	21	0.00142653	0.349291	0.568072	1	11	0.000831507	9606	Homo sapiens	DHDH		R-HSA-6803892	https://reactome.org/PathwayBrowser/#/R-HSA-6804114
R-HSA-425407	SLC-mediated transmembrane transport	10	418	0.0283948	0.352252	0.568072	12	191	0.014438	9606	Homo sapiens	PIWIL2;SLC7A7;SLC6A9;SIT1;SLC40A1;SLC5A11;SLC6A12;SLC7A10;SLC22A7		R-HSA-352052;R-HSA-444007;R-HSA-379415;R-HSA-904830;R-HSA-429571;R-HSA-442368;R-HSA-352029;R-HSA-561041;R-HSA-561059;R-HSA-433101;R-HSA-376200;R-HSA-444120	https://reactome.org/PathwayBrowser/#/R-HSA-425407
R-HSA-1474290	Collagen formation	3	104	0.00706474	0.357635	0.568072	3	77	0.00582055	9606	Homo sapiens	MMP7;PCOLCE;CTSS		R-HSA-2213200;R-HSA-2022141;R-HSA-2002440	https://reactome.org/PathwayBrowser/#/R-HSA-1474290
R-HSA-3560801	Defective B3GAT3 causes JDSSDHD	1	22	0.00149446	0.36248	0.568072	1	1	7.55915e-05	9606	Homo sapiens	BCAN		R-HSA-3560802	https://reactome.org/PathwayBrowser/#/R-HSA-3560801
R-HSA-4641263	Regulation of FZD by ubiquitination	1	22	0.00149446	0.36248	0.568072	3	6	0.000453549	9606	Homo sapiens	FZD4		R-HSA-4641236;R-HSA-4641253;R-HSA-4641249	https://reactome.org/PathwayBrowser/#/R-HSA-4641263
R-HSA-400511	Synthesis, secretion, and inactivation of Glucose-dependent Insulinotropic Polypeptide (GIP)	1	22	0.00149446	0.36248	0.568072	2	7	0.000529141	9606	Homo sapiens	DPP4		R-HSA-9023627;R-HSA-9023626	https://reactome.org/PathwayBrowser/#/R-HSA-400511
R-HSA-3229121	Glycogen storage diseases	1	22	0.00149446	0.36248	0.568072	1	10	0.000755915	9606	Homo sapiens	G6PC		R-HSA-3274540	https://reactome.org/PathwayBrowser/#/R-HSA-3229121
R-HSA-6811436	COPI-independent Golgi-to-ER retrograde traffic	2	63	0.0042796	0.369196	0.568072	2	7	0.000529141	9606	Homo sapiens	TUBB1;TUBA4B		R-HSA-8849350;R-HSA-8849353	https://reactome.org/PathwayBrowser/#/R-HSA-6811436
R-HSA-6807878	COPI-mediated anterograde transport	3	107	0.00726853	0.374203	0.568072	6	12	0.000907098	9606	Homo sapiens	TUBB1;TUBA4B;FOLR1		R-HSA-6807877;R-HSA-6809011;R-HSA-6807875;R-HSA-6809010;R-HSA-6809006;R-HSA-6809003	https://reactome.org/PathwayBrowser/#/R-HSA-6807878
R-HSA-8849932	Synaptic adhesion-like molecules	1	23	0.00156239	0.375403	0.568072	4	8	0.000604732	9606	Homo sapiens	ACE2		R-HSA-8849891;R-HSA-8849900;R-HSA-8849882;R-HSA-8849881	https://reactome.org/PathwayBrowser/#/R-HSA-8849932
R-HSA-417957	P2Y receptors	1	23	0.00156239	0.375403	0.568072	2	13	0.00098269	9606	Homo sapiens	SLC5A11		R-HSA-417829;R-HSA-9611277	https://reactome.org/PathwayBrowser/#/R-HSA-417957
R-HSA-381340	Transcriptional regulation of white adipocyte differentiation	3	108	0.00733646	0.379709	0.568072	10	18	0.00136065	9606	Homo sapiens	ANGPTL4;PPARGC1A		R-HSA-1183058;R-HSA-560472;R-HSA-560473;R-HSA-560491;R-HSA-560493;R-HSA-560510;R-HSA-381309;R-HSA-1183003;R-HSA-560498;R-HSA-560517	https://reactome.org/PathwayBrowser/#/R-HSA-381340
R-HSA-392517	Rap1 signalling	1	24	0.00163032	0.388064	0.568072	1	7	0.000529141	9606	Homo sapiens	PRKG1		R-HSA-913996	https://reactome.org/PathwayBrowser/#/R-HSA-392517
R-HSA-8964058	HDL remodeling	1	24	0.00163032	0.388064	0.568072	1	13	0.00098269	9606	Homo sapiens	APOC3		R-HSA-266303	https://reactome.org/PathwayBrowser/#/R-HSA-8964058
R-HSA-2243919	Crosslinking of collagen fibrils	1	24	0.00163032	0.388064	0.568072	1	13	0.00098269	9606	Homo sapiens	PCOLCE		R-HSA-2022141	https://reactome.org/PathwayBrowser/#/R-HSA-2243919
R-HSA-70263	Gluconeogenesis	2	66	0.00448339	0.390885	0.568072	2	26	0.00196538	9606	Homo sapiens	G6PC;ALDOB		R-HSA-71825;R-HSA-71495	https://reactome.org/PathwayBrowser/#/R-HSA-70263
R-HSA-6798695	Neutrophil degranulation	11	480	0.0326065	0.393373	0.568072	9	10	0.000755915	9606	Homo sapiens	SERPINA3;PTPRB;SERPINB2;GSDMA;CTSZ;PTAFR;HP;FOLR3;ITGAL;CTSS;OSCAR		R-HSA-6798743;R-HSA-6799350;R-HSA-6800434;R-HSA-6798751;R-HSA-6798749;R-HSA-6798748;R-HSA-6798747;R-HSA-6800426;R-HSA-6798745	https://reactome.org/PathwayBrowser/#/R-HSA-6798695
R-HSA-9020702	Interleukin-1 signaling	3	111	0.00754025	0.396159	0.568072	13	47	0.0035528	9606	Homo sapiens	IL1RN;IL1R2;IL1RAP		R-HSA-446694;R-HSA-446692;R-HSA-446862;R-HSA-446894;R-HSA-446701;R-HSA-446634;R-HSA-446868;R-HSA-450133;R-HSA-446130;R-HSA-446684;R-HSA-445757;R-HSA-445752;R-HSA-446648	https://reactome.org/PathwayBrowser/#/R-HSA-9020702
R-HSA-2022870	Chondroitin sulfate biosynthesis	1	25	0.00169825	0.40047	0.568072	9	9	0.000680324	9606	Homo sapiens	BCAN		R-HSA-9632034;R-HSA-2022911;R-HSA-1971487;R-HSA-9632033;R-HSA-1971482;R-HSA-2018682;R-HSA-1971483;R-HSA-2018659;R-HSA-1971491	https://reactome.org/PathwayBrowser/#/R-HSA-2022870
R-HSA-5654720	PI-3K cascade:FGFR4	1	25	0.00169825	0.40047	0.568072	6	7	0.000529141	9606	Homo sapiens	KLB		R-HSA-5654662;R-HSA-5654659;R-HSA-5654669;R-HSA-5654717;R-HSA-5654714;R-HSA-5654667	https://reactome.org/PathwayBrowser/#/R-HSA-5654720
R-HSA-389513	CTLA4 inhibitory signaling	1	25	0.00169825	0.40047	0.568072	2	5	0.000377958	9606	Homo sapiens	LCK		R-HSA-388833;R-HSA-388829	https://reactome.org/PathwayBrowser/#/R-HSA-389513
R-HSA-1482922	Acyl chain remodelling of PI	1	25	0.00169825	0.40047	0.568072	2	6	0.000453549	9606	Homo sapiens	PLA2G2A		R-HSA-1602377;R-HSA-1482868	https://reactome.org/PathwayBrowser/#/R-HSA-1482922
R-HSA-71288	Creatine metabolism	1	25	0.00169825	0.40047	0.568072	1	6	0.000453549	9606	Homo sapiens	SLC6A12		R-HSA-200396	https://reactome.org/PathwayBrowser/#/R-HSA-71288
R-HSA-2142700	Synthesis of Lipoxins (LX)	1	25	0.00169825	0.40047	0.568072	1	8	0.000604732	9606	Homo sapiens	PTGR1		R-HSA-2161844	https://reactome.org/PathwayBrowser/#/R-HSA-2142700
R-HSA-983189	Kinesins	2	68	0.00461925	0.405159	0.568072	2	14	0.00105828	9606	Homo sapiens	TUBB1;TUBA4B		R-HSA-983259;R-HSA-983266	https://reactome.org/PathwayBrowser/#/R-HSA-983189
R-HSA-1442490	Collagen degradation	2	69	0.00468718	0.412236	0.568072	4	34	0.00257011	9606	Homo sapiens	MMP7;MMP19		R-HSA-1454757;R-HSA-1564142;R-HSA-2168923;R-HSA-2537499	https://reactome.org/PathwayBrowser/#/R-HSA-1442490
R-HSA-389357	CD28 dependent PI3K/Akt signaling	1	26	0.00176618	0.412625	0.568072	2	9	0.000680324	9606	Homo sapiens	LCK		R-HSA-389158;R-HSA-388832	https://reactome.org/PathwayBrowser/#/R-HSA-389357
R-HSA-1482925	Acyl chain remodelling of PG	1	26	0.00176618	0.412625	0.568072	2	10	0.000755915	9606	Homo sapiens	PLA2G2A		R-HSA-1602368;R-HSA-1482907	https://reactome.org/PathwayBrowser/#/R-HSA-1482925
R-HSA-5654719	SHC-mediated cascade:FGFR4	1	27	0.00183411	0.424534	0.568072	4	4	0.000302366	9606	Homo sapiens	KLB		R-HSA-5654423;R-HSA-5654428;R-HSA-5654426;R-HSA-5654425	https://reactome.org/PathwayBrowser/#/R-HSA-5654719
R-HSA-193048	Androgen biosynthesis	1	27	0.00183411	0.424534	0.568072	4	9	0.000680324	9606	Homo sapiens	CYP17A1		R-HSA-193072;R-HSA-193099;R-HSA-193070;R-HSA-193068	https://reactome.org/PathwayBrowser/#/R-HSA-193048
R-HSA-211958	Miscellaneous substrates	1	27	0.00183411	0.424534	0.568072	1	5	0.000377958	9606	Homo sapiens	CYP2D6		R-HSA-211968	https://reactome.org/PathwayBrowser/#/R-HSA-211958
R-HSA-5652084	Fructose metabolism	1	27	0.00183411	0.424534	0.568072	1	7	0.000529141	9606	Homo sapiens	ALDOB		R-HSA-70342	https://reactome.org/PathwayBrowser/#/R-HSA-5652084
R-HSA-194002	Glucocorticoid biosynthesis	1	27	0.00183411	0.424534	0.568072	1	9	0.000680324	9606	Homo sapiens	CYP17A1		R-HSA-193068	https://reactome.org/PathwayBrowser/#/R-HSA-194002
R-HSA-8949215	Mitochondrial calcium ion transport	1	27	0.00183411	0.424534	0.568072	1	10	0.000755915	9606	Homo sapiens	VDAC2		R-HSA-8949145	https://reactome.org/PathwayBrowser/#/R-HSA-8949215
R-HSA-209968	Thyroxine biosynthesis	1	27	0.00183411	0.424534	0.568072	1	11	0.000831507	9606	Homo sapiens	DIO1		R-HSA-209772	https://reactome.org/PathwayBrowser/#/R-HSA-209968
R-HSA-9034015	Signaling by NTRK3 (TRKC)	1	27	0.00183411	0.424534	0.568072	1	19	0.00143624	9606	Homo sapiens	DHDH		R-HSA-9603598	https://reactome.org/PathwayBrowser/#/R-HSA-9034015
R-HSA-199977	ER to Golgi Anterograde Transport	4	164	0.0111405	0.431841	0.568072	18	39	0.00294807	9606	Homo sapiens	CTSZ;TUBB1;TUBA4B;FOLR1		R-HSA-6807877;R-HSA-5694418;R-HSA-6807875;R-HSA-203973;R-HSA-5694417;R-HSA-6809006;R-HSA-5694527;R-HSA-5694428;R-HSA-204008;R-HSA-6809003;R-HSA-5694522;R-HSA-5694439;R-HSA-6809011;R-HSA-6809010;R-HSA-5694446;R-HSA-5694410;R-HSA-5694441;R-HSA-5694409	https://reactome.org/PathwayBrowser/#/R-HSA-199977
R-HSA-425393	Transport of inorganic cations/anions and amino acids/oligopeptides	4	164	0.0111405	0.431841	0.568072	4	75	0.00566936	9606	Homo sapiens	SLC7A7;SIT1;SLC6A12;SLC7A10		R-HSA-352052;R-HSA-379415;R-HSA-352029;R-HSA-376200	https://reactome.org/PathwayBrowser/#/R-HSA-425393
R-HSA-156584	Cytosolic sulfonation of small molecules	2	72	0.00489097	0.433212	0.568072	4	24	0.0018142	9606	Homo sapiens	SULT2B1		R-HSA-176609;R-HSA-176631;R-HSA-176517;R-HSA-176494	https://reactome.org/PathwayBrowser/#/R-HSA-156584
R-HSA-389661	Glyoxylate metabolism and glycine degradation	2	72	0.00489097	0.433212	0.568072	3	23	0.0017386	9606	Homo sapiens	DAO;HAO1		R-HSA-389862;R-HSA-389842;R-HSA-389821	https://reactome.org/PathwayBrowser/#/R-HSA-389661
R-HSA-5362517	Signaling by Retinoic Acid	2	72	0.00489097	0.433212	0.568072	2	21	0.00158742	9606	Homo sapiens	AKR1C1;ALDH8A1		R-HSA-5615668;R-HSA-5696101	https://reactome.org/PathwayBrowser/#/R-HSA-5362517
R-HSA-5654712	FRS-mediated FGFR4 signaling	1	28	0.00190204	0.436203	0.568072	9	9	0.000680324	9606	Homo sapiens	KLB		R-HSA-5654422;R-HSA-5654663;R-HSA-5654658;R-HSA-5654418;R-HSA-8941613;R-HSA-5654655;R-HSA-5654653;R-HSA-5654651;R-HSA-5654664	https://reactome.org/PathwayBrowser/#/R-HSA-5654712
R-HSA-977068	Termination of O-glycan biosynthesis	1	28	0.00190204	0.436203	0.568072	5	5	0.000377958	9606	Homo sapiens	MUC3A		R-HSA-977071;R-HSA-977228;R-HSA-981497;R-HSA-981814;R-HSA-981809	https://reactome.org/PathwayBrowser/#/R-HSA-977068
R-HSA-429947	Deadenylation of mRNA	1	28	0.00190204	0.436203	0.568072	4	4	0.000302366	9606	Homo sapiens	PAIP1		R-HSA-430021;R-HSA-429955;R-HSA-8941312;R-HSA-429992	https://reactome.org/PathwayBrowser/#/R-HSA-429947
R-HSA-3238698	WNT ligand biogenesis and trafficking	1	28	0.00190204	0.436203	0.568072	8	12	0.000907098	9606	Homo sapiens	WNT6		R-HSA-3247840;R-HSA-3238691;R-HSA-3247843;R-HSA-3247844;R-HSA-3238694;R-HSA-3781941;R-HSA-3247837;R-HSA-3781943	https://reactome.org/PathwayBrowser/#/R-HSA-3238698
R-HSA-9670439	Signaling by phosphorylated juxtamembrane, extracellular and kinase domain KIT mutants	1	28	0.00190204	0.436203	0.568072	7	11	0.000831507	9606	Homo sapiens	LCK		R-HSA-9670418;R-HSA-9670417;R-HSA-9670416;R-HSA-9670426;R-HSA-9670414;R-HSA-9670413;R-HSA-9670412	https://reactome.org/PathwayBrowser/#/R-HSA-9670439
R-HSA-912694	Regulation of IFNA signaling	1	28	0.00190204	0.436203	0.568072	1	5	0.000377958	9606	Homo sapiens	SOCS3		R-HSA-912680	https://reactome.org/PathwayBrowser/#/R-HSA-912694
R-HSA-418038	Nucleotide-like (purinergic) receptors	1	28	0.00190204	0.436203	0.568072	2	15	0.00113387	9606	Homo sapiens	SLC5A11		R-HSA-417829;R-HSA-9611277	https://reactome.org/PathwayBrowser/#/R-HSA-418038
R-HSA-389957	Prefoldin mediated transfer of substrate to CCT/TriC	1	29	0.00196997	0.447636	0.568072	2	2	0.000151183	9606	Homo sapiens	TUBB1		R-HSA-389970;R-HSA-389980	https://reactome.org/PathwayBrowser/#/R-HSA-389957
R-HSA-2024101	CS/DS degradation	1	29	0.00196997	0.447636	0.568072	3	10	0.000755915	9606	Homo sapiens	BCAN		R-HSA-1793176;R-HSA-2022056;R-HSA-2065233	https://reactome.org/PathwayBrowser/#/R-HSA-2024101
R-HSA-982772	Growth hormone receptor signaling	1	29	0.00196997	0.447636	0.568072	2	28	0.00211656	9606	Homo sapiens	SOCS3		R-HSA-1168809;R-HSA-1168813	https://reactome.org/PathwayBrowser/#/R-HSA-982772
R-HSA-2187338	Visual phototransduction	4	169	0.0114802	0.454314	0.568072	8	92	0.00695442	9606	Homo sapiens	AKR1B10;AKR1C1;APOC3		R-HSA-2404131;R-HSA-2404140;R-HSA-2424254;R-HSA-2395768;R-HSA-2395784;R-HSA-2423785;R-HSA-2429643;R-HSA-2855252	https://reactome.org/PathwayBrowser/#/R-HSA-2187338
R-HSA-392170	ADP signalling through P2Y purinoceptor 12	1	30	0.00203791	0.458837	0.568072	4	4	0.000302366	9606	Homo sapiens	SLC5A11		R-HSA-417829;R-HSA-392195;R-HSA-392187;R-HSA-392202	https://reactome.org/PathwayBrowser/#/R-HSA-392170
R-HSA-3295583	TRP channels	1	30	0.00203791	0.458837	0.568072	1	4	0.000302366	9606	Homo sapiens	TRPV4		R-HSA-3295579	https://reactome.org/PathwayBrowser/#/R-HSA-3295583
R-HSA-70921	Histidine catabolism	1	30	0.00203791	0.458837	0.568072	1	8	0.000604732	9606	Homo sapiens	HAL		R-HSA-70899	https://reactome.org/PathwayBrowser/#/R-HSA-70921
R-HSA-5669034	TNFs bind their physiological receptors	1	30	0.00203791	0.458837	0.568072	1	13	0.00098269	9606	Homo sapiens	TNFSF14		R-HSA-5675948	https://reactome.org/PathwayBrowser/#/R-HSA-5669034
R-HSA-6803157	Antimicrobial peptides	3	123	0.00835541	0.460576	0.568072	4	58	0.00438431	9606	Homo sapiens	PGLYRP2;LEAP2;PLA2G2A		R-HSA-8862771;R-HSA-6799981;R-HSA-6813626;R-HSA-6799977	https://reactome.org/PathwayBrowser/#/R-HSA-6803157
R-HSA-204005	COPII-mediated vesicle transport	2	77	0.00523062	0.467257	0.568072	10	16	0.00120946	9606	Homo sapiens	CTSZ;FOLR1		R-HSA-5694439;R-HSA-5694418;R-HSA-203973;R-HSA-5694417;R-HSA-5694446;R-HSA-5694527;R-HSA-204008;R-HSA-5694522;R-HSA-5694441;R-HSA-5694409	https://reactome.org/PathwayBrowser/#/R-HSA-204005
R-HSA-1971475	A tetrasaccharide linker sequence is required for GAG synthesis	1	31	0.00210584	0.469813	0.568072	5	5	0.000377958	9606	Homo sapiens	BCAN		R-HSA-1889981;R-HSA-9638064;R-HSA-1889978;R-HSA-1878002;R-HSA-1889955	https://reactome.org/PathwayBrowser/#/R-HSA-1971475
R-HSA-5601884	PIWI-interacting RNA (piRNA) biogenesis	1	31	0.00210584	0.469813	0.568072	7	15	0.00113387	9606	Homo sapiens	PIWIL2		R-HSA-5601910;R-HSA-5603062;R-HSA-5601922;R-HSA-5629218;R-HSA-5601929;R-HSA-5601883;R-HSA-5603067	https://reactome.org/PathwayBrowser/#/R-HSA-5601884
R-HSA-1482801	Acyl chain remodelling of PS	1	31	0.00210584	0.469813	0.568072	2	8	0.000604732	9606	Homo sapiens	PLA2G2A		R-HSA-1602374;R-HSA-1482776	https://reactome.org/PathwayBrowser/#/R-HSA-1482801
R-HSA-6783589	Interleukin-6 family signaling	1	31	0.00210584	0.469813	0.568072	2	34	0.00257011	9606	Homo sapiens	SOCS3		R-HSA-1112755;R-HSA-1112602	https://reactome.org/PathwayBrowser/#/R-HSA-6783589
R-HSA-1445148	Translocation of SLC2A4 (GLUT4) to the plasma membrane	2	79	0.00536648	0.480533	0.568072	1	15	0.00113387	9606	Homo sapiens	TUBB1;TUBA4B		R-HSA-2316347	https://reactome.org/PathwayBrowser/#/R-HSA-1445148
R-HSA-1660514	Synthesis of PIPs at the Golgi membrane	1	32	0.00217377	0.480566	0.568072	2	11	0.000831507	9606	Homo sapiens	SACM1L		R-HSA-1676114;R-HSA-1676133	https://reactome.org/PathwayBrowser/#/R-HSA-1660514
R-HSA-8934593	Regulation of RUNX1 Expression and Activity	1	32	0.00217377	0.480566	0.568072	2	19	0.00143624	9606	Homo sapiens	CCND1		R-HSA-8938867;R-HSA-8865320	https://reactome.org/PathwayBrowser/#/R-HSA-8934593
R-HSA-3371497	HSP90 chaperone cycle for steroid hormone receptors (SHR)	2	80	0.00543441	0.487094	0.568072	1	15	0.00113387	9606	Homo sapiens	TUBB1;TUBA4B		R-HSA-5618080	https://reactome.org/PathwayBrowser/#/R-HSA-3371497
R-HSA-198725	Nuclear Events (kinase and transcription factor activation)	2	80	0.00543441	0.487094	0.568072	2	48	0.00362839	9606	Homo sapiens	ID2		R-HSA-9612534;R-HSA-9613476	https://reactome.org/PathwayBrowser/#/R-HSA-198725
R-HSA-3928663	EPHA-mediated growth cone collapse	1	33	0.0022417	0.491102	0.568072	3	4	0.000302366	9606	Homo sapiens	EPHA1		R-HSA-3928651;R-HSA-3928602;R-HSA-3928648	https://reactome.org/PathwayBrowser/#/R-HSA-3928663
R-HSA-140837	Intrinsic Pathway of Fibrin Clot Formation	1	33	0.0022417	0.491102	0.568072	5	24	0.0018142	9606	Homo sapiens	KNG1		R-HSA-158354;R-HSA-158311;R-HSA-158218;R-HSA-158251;R-HSA-158313	https://reactome.org/PathwayBrowser/#/R-HSA-140837
R-HSA-425410	Metal ion SLC transporters	1	33	0.0022417	0.491102	0.568072	2	20	0.00151183	9606	Homo sapiens	SLC40A1		R-HSA-904830;R-HSA-442368	https://reactome.org/PathwayBrowser/#/R-HSA-425410
R-HSA-6803204	TP53 Regulates Transcription of Genes Involved in Cytochrome C Release	1	33	0.0022417	0.491102	0.568072	1	25	0.00188979	9606	Homo sapiens	DHDH		R-HSA-3700984	https://reactome.org/PathwayBrowser/#/R-HSA-6803204
R-HSA-6811558	PI5P, PP2A and IER3 Regulate PI3K/AKT Signaling	3	129	0.00876299	0.491681	0.568072	2	7	0.000529141	9606	Homo sapiens	KLB;LCK;IL1RAP		R-HSA-2316434;R-HSA-8857925	https://reactome.org/PathwayBrowser/#/R-HSA-6811558
R-HSA-4086398	Ca2+ pathway	2	81	0.00550234	0.493604	0.568072	5	27	0.00204097	9606	Homo sapiens	FZD4;PRKG1		R-HSA-4551453;R-HSA-3965444;R-HSA-3965446;R-HSA-3965447;R-HSA-3965441	https://reactome.org/PathwayBrowser/#/R-HSA-4086398
R-HSA-5663084	Diseases of carbohydrate metabolism	2	81	0.00550234	0.493604	0.568072	2	44	0.00332603	9606	Homo sapiens	G6PC;ALDOB		R-HSA-5656438;R-HSA-3274540	https://reactome.org/PathwayBrowser/#/R-HSA-5663084
R-HSA-8852276	The role of GTSE1 in G2/M progression after G2 checkpoint	2	83	0.0056382	0.506466	0.568072	3	10	0.000755915	9606	Homo sapiens	TUBB1;TUBA4B		R-HSA-8852306;R-HSA-8852298;R-HSA-8852280	https://reactome.org/PathwayBrowser/#/R-HSA-8852276
R-HSA-1592389	Activation of Matrix Metalloproteinases	1	35	0.00237756	0.511539	0.568072	7	27	0.00204097	9606	Homo sapiens	MMP7		R-HSA-1604712;R-HSA-1592297;R-HSA-1592362;R-HSA-1604763;R-HSA-1604690;R-HSA-1592436;R-HSA-1604359	https://reactome.org/PathwayBrowser/#/R-HSA-1592389
R-HSA-5654733	Negative regulation of FGFR4 signaling	1	35	0.00237756	0.511539	0.568072	3	14	0.00105828	9606	Homo sapiens	KLB		R-HSA-5654566;R-HSA-5654734;R-HSA-5654684	https://reactome.org/PathwayBrowser/#/R-HSA-5654733
R-HSA-382551	Transport of small molecules	20	967	0.0656885	0.511761	0.568072	41	441	0.0333359	9606	Homo sapiens	PIWIL2;TTYH2;MTTP;SLC40A1;SLC5A11;SLC6A12;APOC3;VLDLR;SLC7A10;LIPC;SLC7A7;CREB3L3;SLC6A9;FXYD3;SIT1;TRPV4;VDAC2;ANGPTL4;SLC22A7		R-HSA-8855111;R-HSA-174786;R-HSA-174657;R-HSA-6784676;R-HSA-429571;R-HSA-442368;R-HSA-174660;R-HSA-6784622;R-HSA-5694109;R-HSA-433101;R-HSA-6784620;R-HSA-917891;R-HSA-376200;R-HSA-936897;R-HSA-8949145;R-HSA-379415;R-HSA-6784628;R-HSA-174741;R-HSA-352029;R-HSA-561041;R-HSA-6785213;R-HSA-2744242;R-HSA-8855131;R-HSA-8855130;R-HSA-444120;R-HSA-8866329;R-HSA-174690;R-HSA-444007;R-HSA-8854628;R-HSA-917…	https://reactome.org/PathwayBrowser/#/R-HSA-382551
R-HSA-1474244	Extracellular matrix organization	7	330	0.022417	0.513335	0.568072	39	319	0.0241137	9606	Homo sapiens	BCAN;MMP7;ELN;MMP19;PCOLCE;ITGAL;CTSS		R-HSA-2514790;R-HSA-4086205;R-HSA-1604763;R-HSA-3791295;R-HSA-199050;R-HSA-1604690;R-HSA-2534248;R-HSA-1454791;R-HSA-1566981;R-HSA-3788075;R-HSA-2424246;R-HSA-2328048;R-HSA-1566979;R-HSA-3791149;R-HSA-2002440;R-HSA-8940561;R-HSA-1592387;R-HSA-202718;R-HSA-1604359;R-HSA-2161282;R-HSA-2022141;R-HSA-1566962;R-HSA-2129353;R-HSA-1454781;R-HSA-1592436;R-HSA-2161293;R-HSA-1454843;R-HSA-3791319;R-HSA-160…	https://reactome.org/PathwayBrowser/#/R-HSA-1474244
R-HSA-5654716	Downstream signaling of activated FGFR4	1	36	0.00244549	0.521449	0.568072	22	23	0.0017386	9606	Homo sapiens	KLB		R-HSA-5654422;R-HSA-5654423;R-HSA-5654418;R-HSA-5654163;R-HSA-8941613;R-HSA-5654655;R-HSA-5654428;R-HSA-5654717;R-HSA-5654653;R-HSA-5654714;R-HSA-5654426;R-HSA-5654651;R-HSA-5654169;R-HSA-5654425;R-HSA-5654662;R-HSA-5654151;R-HSA-5654663;R-HSA-5654658;R-HSA-5654659;R-HSA-5654669;R-HSA-5654667;R-HSA-5654664	https://reactome.org/PathwayBrowser/#/R-HSA-5654716
R-HSA-2424491	DAP12 signaling	1	36	0.00244549	0.521449	0.568072	10	17	0.00128506	9606	Homo sapiens	LCK		R-HSA-2395412;R-HSA-2424484;R-HSA-210289;R-HSA-2424486;R-HSA-2424487;R-HSA-2424480;R-HSA-2396594;R-HSA-2424482;R-HSA-2395439;R-HSA-2395801	https://reactome.org/PathwayBrowser/#/R-HSA-2424491
R-HSA-9687139	Aberrant regulation of mitotic cell cycle due to RB1 defects	1	36	0.00244549	0.521449	0.568072	1	3	0.000226775	9606	Homo sapiens	CCND1		R-HSA-9659782	https://reactome.org/PathwayBrowser/#/R-HSA-9687139
R-HSA-391903	Eicosanoid ligand-binding receptors	1	36	0.00244549	0.521449	0.568072	1	14	0.00105828	9606	Homo sapiens	PTGDR2		R-HSA-391934	https://reactome.org/PathwayBrowser/#/R-HSA-391903
R-HSA-159418	Recycling of bile acids and salts	1	37	0.00251342	0.531159	0.568072	1	12	0.000907098	9606	Homo sapiens	BAAT		R-HSA-159431	https://reactome.org/PathwayBrowser/#/R-HSA-159418
R-HSA-203615	eNOS activation	1	37	0.00251342	0.531159	0.568072	1	20	0.00151183	9606	Homo sapiens	DDAH1		R-HSA-5693373	https://reactome.org/PathwayBrowser/#/R-HSA-203615
R-HSA-2151201	Transcriptional activation of mitochondrial biogenesis	2	87	0.00590992	0.531545	0.568072	11	32	0.00241893	9606	Homo sapiens	PPARGC1A		R-HSA-1592232;R-HSA-2466391;R-HSA-1592234;R-HSA-1592252;R-HSA-1592236;R-HSA-1605535;R-HSA-1368140;R-HSA-1592242;R-HSA-1605428;R-HSA-2466392;R-HSA-1592246	https://reactome.org/PathwayBrowser/#/R-HSA-2151201
R-HSA-199418	Negative regulation of the PI3K/AKT network	3	137	0.00930643	0.531734	0.568072	2	10	0.000755915	9606	Homo sapiens	KLB;LCK;IL1RAP		R-HSA-2316434;R-HSA-8857925	https://reactome.org/PathwayBrowser/#/R-HSA-199418
R-HSA-114608	Platelet degranulation	3	137	0.00930643	0.531734	0.568072	1	11	0.000831507	9606	Homo sapiens	SERPINA3;SERPINF2;KNG1		R-HSA-481007	https://reactome.org/PathwayBrowser/#/R-HSA-114608
R-HSA-5579029	Metabolic disorders of biological oxidation enzymes	2	88	0.00597785	0.537678	0.568072	4	39	0.00294807	9606	Homo sapiens	CYP19A1;CYP17A1		R-HSA-5601843;R-HSA-9035954;R-HSA-5601849;R-HSA-9035956	https://reactome.org/PathwayBrowser/#/R-HSA-5579029
R-HSA-2995410	Nuclear Envelope (NE) Reassembly	2	88	0.00597785	0.537678	0.568072	1	24	0.0018142	9606	Homo sapiens	TUBB1;TUBA4B		R-HSA-9668419	https://reactome.org/PathwayBrowser/#/R-HSA-2995410
R-HSA-2129379	Molecules associated with elastic fibres	1	38	0.00258135	0.540672	0.568072	3	10	0.000755915	9606	Homo sapiens	ELN		R-HSA-2161282;R-HSA-2328048;R-HSA-1592387	https://reactome.org/PathwayBrowser/#/R-HSA-2129379
R-HSA-9675126	Diseases of mitotic cell cycle	1	38	0.00258135	0.540672	0.568072	1	5	0.000377958	9606	Homo sapiens	CCND1		R-HSA-9659782	https://reactome.org/PathwayBrowser/#/R-HSA-9675126
R-HSA-1296065	Inwardly rectifying K+ channels	1	38	0.00258135	0.540672	0.568072	1	7	0.000529141	9606	Homo sapiens	TRPV4		R-HSA-1296046	https://reactome.org/PathwayBrowser/#/R-HSA-1296065
R-HSA-9663891	Selective autophagy	2	89	0.00604578	0.543756	0.568072	4	48	0.00362839	9606	Homo sapiens	TUBB1;TUBA4B		R-HSA-9646679;R-HSA-9646390;R-HSA-9646383;R-HSA-9646685	https://reactome.org/PathwayBrowser/#/R-HSA-9663891
R-HSA-9018677	Biosynthesis of DHA-derived SPMs	2	89	0.00604578	0.543756	0.568072	3	58	0.00438431	9606	Homo sapiens	CYP2D6;CYP2E1		R-HSA-9027321;R-HSA-9027043;R-HSA-9027302	https://reactome.org/PathwayBrowser/#/R-HSA-9018677
R-HSA-5685938	HDR through Single Strand Annealing (SSA)	1	39	0.00264928	0.549992	0.568072	4	6	0.000453549	9606	Homo sapiens	CYP17A1		R-HSA-5686642;R-HSA-5686657;R-HSA-5693564;R-HSA-5693580	https://reactome.org/PathwayBrowser/#/R-HSA-5685938
R-HSA-389356	CD28 co-stimulation	1	39	0.00264928	0.549992	0.568072	9	19	0.00143624	9606	Homo sapiens	LCK		R-HSA-389381;R-HSA-389348;R-HSA-389158;R-HSA-389350;R-HSA-388832;R-HSA-388831;R-HSA-388814;R-HSA-389352;R-HSA-389354	https://reactome.org/PathwayBrowser/#/R-HSA-389356
R-HSA-168256	Immune System	55	2713	0.184295	0.551386	0.568072	188	1593	0.120417	9606	Homo sapiens	SERPINA3;TRIM50;IL1RN;PGLYRP2;LEAP2;EBI3;CTSZ;PTAFR;HP;IL1RAP;C8B;ITGAL;CTSS;RASGRP3;SOCS3;CCND1;TUBB1;LGALS9;GBP2;TRIM22;PRKG1;SERPINB2;GSDMA;TNFSF14;IL1R2;PLA2G2A;IL18;SLC6A12;TUBA4B;MUC3A;OSCAR;IL22RA1;RNF144B;PTPRB;CD8B;LCK;IL23A;LCP1;FOLR3;CCL26		R-HSA-389381;R-HSA-452100;R-HSA-8858500;R-HSA-202245;R-HSA-8984963;R-HSA-1112602;R-HSA-6799981;R-HSA-2395439;R-HSA-202248;R-HSA-8950405;R-HSA-8987012;R-HSA-6799977;R-HSA-8987014;R-HSA-8950426;R-HSA-8950441;R-HSA-389158;R-HSA-449058;R-HSA-8952749;R-HSA-912680;R-HSA-8983983;R-HSA-198955;R-HSA-8987043;R-HSA-1031716;R-HSA-8987042;R-HSA-1031713;R-HSA-8950183;R-HSA-8937656;R-HSA-2395412;R-HSA-202291;R-…	https://reactome.org/PathwayBrowser/#/R-HSA-168256
R-HSA-390522	Striated Muscle Contraction	1	40	0.00271721	0.559124	0.568072	4	4	0.000302366	9606	Homo sapiens	MYBPC1		R-HSA-390597;R-HSA-390598;R-HSA-390593;R-HSA-390595	https://reactome.org/PathwayBrowser/#/R-HSA-390522
R-HSA-1482788	Acyl chain remodelling of PC	1	40	0.00271721	0.559124	0.568072	2	9	0.000680324	9606	Homo sapiens	PLA2G2A		R-HSA-1482816;R-HSA-1602417	https://reactome.org/PathwayBrowser/#/R-HSA-1482788
R-HSA-76005	Response to elevated platelet cytosolic Ca2+	3	144	0.00978194	0.56529	0.568072	1	14	0.00105828	9606	Homo sapiens	SERPINA3;SERPINF2;KNG1		R-HSA-481007	https://reactome.org/PathwayBrowser/#/R-HSA-76005
R-HSA-6794362	Protein-protein interactions at synapses	2	93	0.00631751	0.567508	0.568072	5	33	0.00249452	9606	Homo sapiens	ACE2;IL1RAP		R-HSA-8849891;R-HSA-8849900;R-HSA-6800380;R-HSA-8849882;R-HSA-8849881	https://reactome.org/PathwayBrowser/#/R-HSA-6794362
R-HSA-392154	Nitric oxide stimulates guanylate cyclase	1	41	0.00278514	0.568072	0.568072	3	7	0.000529141	9606	Homo sapiens	PRKG1		R-HSA-418549;R-HSA-418451;R-HSA-418442	https://reactome.org/PathwayBrowser/#/R-HSA-392154
R-HSA-5693616	Presynaptic phase of homologous DNA pairing and strand exchange	1	41	0.00278514	0.568072	0.568072	1	5	0.000377958	9606	Homo sapiens	CYP17A1		R-HSA-5693561	https://reactome.org/PathwayBrowser/#/R-HSA-5693616
R-HSA-202131	Metabolism of nitric oxide: NOS3 activation and regulation	1	41	0.00278514	0.568072	0.568072	1	26	0.00196538	9606	Homo sapiens	DDAH1		R-HSA-5693373	https://reactome.org/PathwayBrowser/#/R-HSA-202131
R-HSA-211945	Phase I - Functionalization of compounds	6	299	0.0203111	0.574199	0.574199	22	98	0.00740797	9606	Homo sapiens	AOC3;CYP2B6;CYP2D6;CYP2E1;CYP19A1;CYP3A7		R-HSA-76416;R-HSA-5696183;R-HSA-76354;R-HSA-211968;R-HSA-76453;R-HSA-211910;R-HSA-212005;R-HSA-193060;R-HSA-76456;R-HSA-211882;R-HSA-211881;R-HSA-211983;R-HSA-76397;R-HSA-143468;R-HSA-211948;R-HSA-76434;R-HSA-211991;R-HSA-213175;R-HSA-211988;R-HSA-76475;R-HSA-211929;R-HSA-211966	https://reactome.org/PathwayBrowser/#/R-HSA-211945
R-HSA-202430	Translocation of ZAP-70 to Immunological synapse	1	42	0.00285307	0.576838	0.576838	4	4	0.000302366	9606	Homo sapiens	LCK		R-HSA-8855381;R-HSA-202168;R-HSA-202344;R-HSA-202174	https://reactome.org/PathwayBrowser/#/R-HSA-202430
R-HSA-6783310	Fanconi Anemia Pathway	1	42	0.00285307	0.576838	0.576838	6	13	0.00098269	9606	Homo sapiens	EBI3		R-HSA-6786166;R-HSA-6785732;R-HSA-6785986;R-HSA-6785361;R-HSA-6786171;R-HSA-6786155	https://reactome.org/PathwayBrowser/#/R-HSA-6783310
R-HSA-1482839	Acyl chain remodelling of PE	1	42	0.00285307	0.576838	0.576838	2	9	0.000680324	9606	Homo sapiens	PLA2G2A		R-HSA-1482887;R-HSA-1602398	https://reactome.org/PathwayBrowser/#/R-HSA-1482839
R-HSA-8878166	Transcriptional regulation by RUNX2	3	147	0.00998573	0.579216	0.579216	4	84	0.00634969	9606	Homo sapiens	CCND1;DHDH;PPARGC1A		R-HSA-8939929;R-HSA-8939900;R-HSA-9008412;R-HSA-9008839	https://reactome.org/PathwayBrowser/#/R-HSA-8878166
R-HSA-2132295	MHC class II antigen presentation	3	148	0.0100537	0.583795	0.583795	4	26	0.00196538	9606	Homo sapiens	TUBB1;TUBA4B;CTSS		R-HSA-2213248;R-HSA-2130706;R-HSA-2130504;R-HSA-2130349	https://reactome.org/PathwayBrowser/#/R-HSA-2132295
R-HSA-438064	Post NMDA receptor activation events	2	96	0.0065213	0.58473	0.58473	1	39	0.00294807	9606	Homo sapiens	TUBB1;TUBA4B		R-HSA-9619542	https://reactome.org/PathwayBrowser/#/R-HSA-438064
R-HSA-432720	Lysosome Vesicle Biogenesis	1	43	0.002921	0.585427	0.585427	4	8	0.000604732	9606	Homo sapiens	CTSZ		R-HSA-432706;R-HSA-432707;R-HSA-432688;R-HSA-432712	https://reactome.org/PathwayBrowser/#/R-HSA-432720
R-HSA-381771	Synthesis, secretion, and inactivation of Glucagon-like Peptide-1 (GLP-1)	1	43	0.002921	0.585427	0.585427	2	7	0.000529141	9606	Homo sapiens	DPP4		R-HSA-9023633;R-HSA-9023632	https://reactome.org/PathwayBrowser/#/R-HSA-381771
R-HSA-9669938	Signaling by KIT in disease	1	43	0.002921	0.585427	0.585427	7	26	0.00196538	9606	Homo sapiens	LCK		R-HSA-9670418;R-HSA-9670417;R-HSA-9670416;R-HSA-9670426;R-HSA-9670414;R-HSA-9670413;R-HSA-9670412	https://reactome.org/PathwayBrowser/#/R-HSA-9669938
R-HSA-114604	GPVI-mediated activation cascade	1	43	0.002921	0.585427	0.585427	1	25	0.00188979	9606	Homo sapiens	LCK		R-HSA-434836	https://reactome.org/PathwayBrowser/#/R-HSA-114604
R-HSA-380320	Recruitment of NuMA to mitotic centrosomes	2	97	0.00658923	0.590358	0.590358	1	2	0.000151183	9606	Homo sapiens	TUBB1;TUBA4B		R-HSA-380316	https://reactome.org/PathwayBrowser/#/R-HSA-380320
R-HSA-5693579	Homologous DNA Pairing and Strand Exchange	1	44	0.00298893	0.593843	0.593843	1	8	0.000604732	9606	Homo sapiens	CYP17A1		R-HSA-5693561	https://reactome.org/PathwayBrowser/#/R-HSA-5693579
R-HSA-3899300	SUMOylation of transcription cofactors	1	44	0.00298893	0.593843	0.593843	1	27	0.00204097	9606	Homo sapiens	PPARGC1A		R-HSA-3903017	https://reactome.org/PathwayBrowser/#/R-HSA-3899300
R-HSA-112310	Neurotransmitter release cycle	2	99	0.00672509	0.601442	0.601442	2	37	0.00279689	9606	Homo sapiens	SLC6A12		R-HSA-444007;R-HSA-352029	https://reactome.org/PathwayBrowser/#/R-HSA-112310
R-HSA-2980736	Peptide hormone metabolism	3	152	0.0103254	0.601795	0.601795	7	63	0.00476226	9606	Homo sapiens	DPP4;ACE2;CTSZ		R-HSA-9023627;R-HSA-9023626;R-HSA-2022381;R-HSA-2022378;R-HSA-2022379;R-HSA-9023633;R-HSA-9023632	https://reactome.org/PathwayBrowser/#/R-HSA-2980736
R-HSA-202427	Phosphorylation of CD3 and TCR zeta chains	1	45	0.00305686	0.602088	0.602088	5	7	0.000529141	9606	Homo sapiens	LCK		R-HSA-202291;R-HSA-202214;R-HSA-202165;R-HSA-202233;R-HSA-8852200	https://reactome.org/PathwayBrowser/#/R-HSA-202427
R-HSA-392518	Signal amplification	1	45	0.00305686	0.602088	0.602088	4	19	0.00143624	9606	Homo sapiens	SLC5A11		R-HSA-417829;R-HSA-392195;R-HSA-392187;R-HSA-392202	https://reactome.org/PathwayBrowser/#/R-HSA-392518
R-HSA-390466	Chaperonin-mediated protein folding	2	100	0.00679302	0.6069	0.6069	4	19	0.00143624	9606	Homo sapiens	TUBB1;TUBA4B		R-HSA-389954;R-HSA-389970;R-HSA-389980;R-HSA-389961	https://reactome.org/PathwayBrowser/#/R-HSA-390466
R-HSA-1566948	Elastic fibre formation	1	46	0.00312479	0.610166	0.610166	6	17	0.00128506	9606	Homo sapiens	ELN		R-HSA-2161282;R-HSA-2328048;R-HSA-2129353;R-HSA-1592387;R-HSA-2161293;R-HSA-2129375	https://reactome.org/PathwayBrowser/#/R-HSA-1566948
R-HSA-381119	Unfolded Protein Response (UPR)	3	155	0.0105292	0.614955	0.614955	5	94	0.0071056	9606	Homo sapiens	IGFBP1;CREB3L3		R-HSA-8874208;R-HSA-1791180;R-HSA-8874206;R-HSA-8874202;R-HSA-8874201	https://reactome.org/PathwayBrowser/#/R-HSA-381119
R-HSA-400508	Incretin synthesis, secretion, and inactivation	1	47	0.00319272	0.618081	0.618081	4	14	0.00105828	9606	Homo sapiens	DPP4		R-HSA-9023627;R-HSA-9023626;R-HSA-9023633;R-HSA-9023632	https://reactome.org/PathwayBrowser/#/R-HSA-400508
R-HSA-389948	PD-1 signaling	1	48	0.00326065	0.625835	0.625835	3	5	0.000377958	9606	Homo sapiens	LCK		R-HSA-389762;R-HSA-389759;R-HSA-389758	https://reactome.org/PathwayBrowser/#/R-HSA-389948
R-HSA-9660826	Purinergic signaling in leishmaniasis infection	1	48	0.00326065	0.625835	0.625835	2	23	0.0017386	9606	Homo sapiens	IL18		R-HSA-449058;R-HSA-448703	https://reactome.org/PathwayBrowser/#/R-HSA-9660826
R-HSA-9664424	Cell recruitment (pro-inflammatory response)	1	48	0.00326065	0.625835	0.625835	2	23	0.0017386	9606	Homo sapiens	IL18		R-HSA-449058;R-HSA-448703	https://reactome.org/PathwayBrowser/#/R-HSA-9664424
R-HSA-400253	Circadian Clock	2	104	0.00706474	0.628162	0.628162	6	59	0.0044599	9606	Homo sapiens	PPARGC1A		R-HSA-400342;R-HSA-1368087;R-HSA-1368140;R-HSA-549475;R-HSA-5663258;R-HSA-5663273	https://reactome.org/PathwayBrowser/#/R-HSA-400253
R-HSA-9018678	Biosynthesis of specialized proresolving mediators (SPMs)	3	159	0.0108009	0.632043	0.632043	4	124	0.00937335	9606	Homo sapiens	CYP2D6;CYP2E1;PTGR1		R-HSA-9027321;R-HSA-2161844;R-HSA-9027043;R-HSA-9027302	https://reactome.org/PathwayBrowser/#/R-HSA-9018678
R-HSA-2219530	Constitutive Signaling by Aberrant PI3K in Cancer	2	106	0.0072006	0.638454	0.638454	1	2	0.000151183	9606	Homo sapiens	KLB;LCK		R-HSA-2400009	https://reactome.org/PathwayBrowser/#/R-HSA-2219530
R-HSA-391251	Protein folding	2	106	0.0072006	0.638454	0.638454	13	28	0.00211656	9606	Homo sapiens	TUBB1;TUBA4B		R-HSA-389956;R-HSA-389955;R-HSA-389954;R-HSA-389964;R-HSA-389961;R-HSA-389963;R-HSA-389972;R-HSA-389974;R-HSA-389969;R-HSA-389970;R-HSA-389980;R-HSA-389976;R-HSA-389978	https://reactome.org/PathwayBrowser/#/R-HSA-391251
R-HSA-6811434	COPI-dependent Golgi-to-ER retrograde traffic	2	107	0.00726853	0.643516	0.643516	2	11	0.000831507	9606	Homo sapiens	TUBB1;TUBA4B		R-HSA-6811426;R-HSA-6811423	https://reactome.org/PathwayBrowser/#/R-HSA-6811434
R-HSA-5654743	Signaling by FGFR4	1	51	0.00346444	0.64817	0.64817	27	41	0.00309925	9606	Homo sapiens	KLB		R-HSA-5654422;R-HSA-5654423;R-HSA-5654418;R-HSA-5654163;R-HSA-5654428;R-HSA-5654684;R-HSA-5654426;R-HSA-5654169;R-HSA-5654425;R-HSA-5654662;R-HSA-5654151;R-HSA-5654663;R-HSA-5654658;R-HSA-5654659;R-HSA-5654734;R-HSA-5654669;R-HSA-5654667;R-HSA-5654664;R-HSA-1307955;R-HSA-8941613;R-HSA-1307963;R-HSA-5654655;R-HSA-5654717;R-HSA-5654653;R-HSA-5654714;R-HSA-5654651;R-HSA-5654566	https://reactome.org/PathwayBrowser/#/R-HSA-5654743
R-HSA-69231	Cyclin D associated events in G1	1	51	0.00346444	0.64817	0.64817	9	15	0.00113387	9606	Homo sapiens	CCND1		R-HSA-8941915;R-HSA-8942607;R-HSA-9018017;R-HSA-69227;R-HSA-8942803;R-HSA-1226094;R-HSA-8942836;R-HSA-1226095;R-HSA-8941895	https://reactome.org/PathwayBrowser/#/R-HSA-69231
R-HSA-69236	G1 Phase	1	51	0.00346444	0.64817	0.64817	9	15	0.00113387	9606	Homo sapiens	CCND1		R-HSA-8941915;R-HSA-8942607;R-HSA-9018017;R-HSA-69227;R-HSA-8942803;R-HSA-1226094;R-HSA-8942836;R-HSA-1226095;R-HSA-8941895	https://reactome.org/PathwayBrowser/#/R-HSA-69236
R-HSA-549132	Organic cation/anion/zwitterion transport	1	51	0.00346444	0.64817	0.64817	2	12	0.000907098	9606	Homo sapiens	SLC22A7		R-HSA-561041;R-HSA-561059	https://reactome.org/PathwayBrowser/#/R-HSA-549132
R-HSA-73621	Pyrimidine catabolism	1	51	0.00346444	0.64817	0.64817	2	17	0.00128506	9606	Homo sapiens	UPB1		R-HSA-73620;R-HSA-73591	https://reactome.org/PathwayBrowser/#/R-HSA-73621
R-HSA-75876	Synthesis of very long-chain fatty acyl-CoAs	1	51	0.00346444	0.64817	0.64817	1	12	0.000907098	9606	Homo sapiens	ACSL6		R-HSA-201035	https://reactome.org/PathwayBrowser/#/R-HSA-75876
R-HSA-8957275	Post-translational protein phosphorylation	2	109	0.00740439	0.653472	0.653472	1	1	7.55915e-05	9606	Homo sapiens	IGFBP1;KNG1		R-HSA-8952289	https://reactome.org/PathwayBrowser/#/R-HSA-8957275
R-HSA-2142691	Synthesis of Leukotrienes (LT) and Eoxins (EX)	1	52	0.00353237	0.655315	0.655315	1	19	0.00143624	9606	Homo sapiens	PTGR1		R-HSA-2161567	https://reactome.org/PathwayBrowser/#/R-HSA-2142691
R-HSA-948021	Transport to the Golgi and subsequent modification	4	219	0.0148767	0.655843	0.655843	18	60	0.00453549	9606	Homo sapiens	CTSZ;TUBB1;TUBA4B;FOLR1		R-HSA-6807877;R-HSA-5694418;R-HSA-6807875;R-HSA-203973;R-HSA-5694417;R-HSA-6809006;R-HSA-5694527;R-HSA-5694428;R-HSA-204008;R-HSA-6809003;R-HSA-5694522;R-HSA-5694439;R-HSA-6809011;R-HSA-6809010;R-HSA-5694446;R-HSA-5694410;R-HSA-5694441;R-HSA-5694409	https://reactome.org/PathwayBrowser/#/R-HSA-948021
R-HSA-2142753	Arachidonic acid metabolism	3	166	0.0112764	0.660668	0.660668	4	77	0.00582055	9606	Homo sapiens	AKR1C1;PTGR1;PTGES		R-HSA-2161660;R-HSA-2161549;R-HSA-2161614;R-HSA-2161567	https://reactome.org/PathwayBrowser/#/R-HSA-2142753
R-HSA-166520	Signaling by NTRKs	3	166	0.0112764	0.660668	0.660668	3	164	0.012397	9606	Homo sapiens	ID2;DHDH		R-HSA-9612534;R-HSA-9613476;R-HSA-9603598	https://reactome.org/PathwayBrowser/#/R-HSA-166520
R-HSA-2172127	DAP12 interactions	1	53	0.0036003	0.662316	0.662316	10	33	0.00249452	9606	Homo sapiens	LCK		R-HSA-2395412;R-HSA-2424484;R-HSA-210289;R-HSA-2424486;R-HSA-2424487;R-HSA-2424480;R-HSA-2396594;R-HSA-2424482;R-HSA-2395439;R-HSA-2395801	https://reactome.org/PathwayBrowser/#/R-HSA-2172127
R-HSA-3214858	RMTs methylate histone arginines	1	53	0.0036003	0.662316	0.662316	6	22	0.00166301	9606	Homo sapiens	CCND1		R-HSA-3215426;R-HSA-5216234;R-HSA-5205799;R-HSA-3215385;R-HSA-5205861;R-HSA-5661117	https://reactome.org/PathwayBrowser/#/R-HSA-3214858
R-HSA-75815	Ubiquitin-dependent degradation of Cyclin D	1	54	0.00366823	0.669175	0.669175	5	5	0.000377958	9606	Homo sapiens	CCND1		R-HSA-75825;R-HSA-75824;R-HSA-75820;R-HSA-75823;R-HSA-75822	https://reactome.org/PathwayBrowser/#/R-HSA-75815
R-HSA-3928665	EPH-ephrin mediated repulsion of cells	1	55	0.00373616	0.675896	0.675896	6	9	0.000680324	9606	Homo sapiens	EPHA1		R-HSA-4093327;R-HSA-3928607;R-HSA-3928604;R-HSA-3928642;R-HSA-3928628;R-HSA-3928660	https://reactome.org/PathwayBrowser/#/R-HSA-3928665
R-HSA-3560782	Diseases associated with glycosaminoglycan metabolism	1	55	0.00373616	0.675896	0.675896	7	29	0.00219215	9606	Homo sapiens	BCAN		R-HSA-3636919;R-HSA-3595175;R-HSA-3560804;R-HSA-3560802;R-HSA-3595178;R-HSA-4420365;R-HSA-3595176	https://reactome.org/PathwayBrowser/#/R-HSA-3560782
R-HSA-9609507	Protein localization	3	170	0.0115481	0.67629	0.67629	3	53	0.00400635	9606	Homo sapiens	DAO;HAO1;BAAT		R-HSA-9033233;R-HSA-9033235;R-HSA-9033236	https://reactome.org/PathwayBrowser/#/R-HSA-9609507
R-HSA-442755	Activation of NMDA receptors and postsynaptic events	2	114	0.00774404	0.677394	0.677394	3	71	0.005367	9606	Homo sapiens	TUBB1;TUBA4B		R-HSA-9610627;R-HSA-9619542;R-HSA-9610408	https://reactome.org/PathwayBrowser/#/R-HSA-442755
R-HSA-6805567	Keratinization	4	226	0.0153522	0.679739	0.679739	16	34	0.00257011	9606	Homo sapiens	KRT7;PRSS8;KRT6A		R-HSA-6806629;R-HSA-6805573;R-HSA-8849797;R-HSA-6814734;R-HSA-6814764;R-HSA-6805546;R-HSA-6806613;R-HSA-6810357;R-HSA-6811539;R-HSA-6814387;R-HSA-6806610;R-HSA-6809393;R-HSA-6809663;R-HSA-8942224;R-HSA-6814298;R-HSA-6810937	https://reactome.org/PathwayBrowser/#/R-HSA-6805567
R-HSA-163125	Post-translational modification: synthesis of GPI-anchored proteins	2	115	0.00781197	0.682014	0.682014	1	16	0.00120946	9606	Homo sapiens	LYPD3;FOLR3		R-HSA-8940388	https://reactome.org/PathwayBrowser/#/R-HSA-163125
R-HSA-5620924	Intraflagellar transport	1	56	0.00380409	0.68248	0.68248	6	12	0.000907098	9606	Homo sapiens	TUBB1		R-HSA-5624949;R-HSA-5625424;R-HSA-5625426;R-HSA-5625421;R-HSA-5624952;R-HSA-5625416	https://reactome.org/PathwayBrowser/#/R-HSA-5620924
R-HSA-450408	AUF1 (hnRNP D0) binds and destabilizes mRNA	1	56	0.00380409	0.68248	0.68248	2	4	0.000302366	9606	Homo sapiens	HSPB8		R-HSA-450551;R-HSA-450580	https://reactome.org/PathwayBrowser/#/R-HSA-450408
R-HSA-156588	Glucuronidation	1	56	0.00380409	0.68248	0.68248	1	11	0.000831507	9606	Homo sapiens	UGT2B7		R-HSA-174931	https://reactome.org/PathwayBrowser/#/R-HSA-156588
R-HSA-209776	Metabolism of amine-derived hormones	1	56	0.00380409	0.68248	0.68248	1	21	0.00158742	9606	Homo sapiens	DIO1		R-HSA-209772	https://reactome.org/PathwayBrowser/#/R-HSA-209776
R-HSA-8856825	Cargo recognition for clathrin-mediated endocytosis	2	116	0.0078799	0.68658	0.68658	3	15	0.00113387	9606	Homo sapiens	FZD4;SYT8		R-HSA-8863463;R-HSA-8866269;R-HSA-8866283	https://reactome.org/PathwayBrowser/#/R-HSA-8856825
R-HSA-380108	Chemokine receptors bind chemokines	1	57	0.00387202	0.688931	0.688931	1	19	0.00143624	9606	Homo sapiens	CCL26		R-HSA-443986	https://reactome.org/PathwayBrowser/#/R-HSA-380108
R-HSA-1989781	PPARA activates gene expression	3	174	0.0118198	0.691377	0.691377	2	41	0.00309925	9606	Homo sapiens	ANGPTL4;PPARGC1A		R-HSA-560473;R-HSA-560517	https://reactome.org/PathwayBrowser/#/R-HSA-1989781
R-HSA-109704	PI3K Cascade	1	58	0.00393995	0.695251	0.695251	1	6	0.000453549	9606	Homo sapiens	KLB		R-HSA-109699	https://reactome.org/PathwayBrowser/#/R-HSA-109704
R-HSA-400206	Regulation of lipid metabolism by PPARalpha	3	176	0.0119557	0.69872	0.69872	2	44	0.00332603	9606	Homo sapiens	ANGPTL4;PPARGC1A		R-HSA-560473;R-HSA-560517	https://reactome.org/PathwayBrowser/#/R-HSA-400206
R-HSA-202433	Generation of second messenger molecules	1	59	0.00400788	0.701443	0.701443	3	17	0.00128506	9606	Homo sapiens	LCK		R-HSA-202245;R-HSA-202248;R-HSA-202216	https://reactome.org/PathwayBrowser/#/R-HSA-202433
R-HSA-3371571	HSF1-dependent transactivation	1	59	0.00400788	0.701443	0.701443	1	8	0.000604732	9606	Homo sapiens	HSPB8		R-HSA-5082356	https://reactome.org/PathwayBrowser/#/R-HSA-3371571
R-HSA-2672351	Stimuli-sensing channels	2	120	0.00815162	0.70431	0.70431	2	28	0.00211656	9606	Homo sapiens	TTYH2;TRPV4		R-HSA-3295579;R-HSA-2744242	https://reactome.org/PathwayBrowser/#/R-HSA-2672351
R-HSA-9648025	EML4 and NUDC in mitotic spindle formation	2	121	0.00821955	0.70861	0.70861	2	5	0.000377958	9606	Homo sapiens	TUBB1;TUBA4B		R-HSA-9648114;R-HSA-9648017	https://reactome.org/PathwayBrowser/#/R-HSA-9648025
R-HSA-109606	Intrinsic Pathway for Apoptosis	1	61	0.00414374	0.713454	0.713454	6	62	0.00468667	9606	Homo sapiens	DHDH		R-HSA-114307;R-HSA-114275;R-HSA-168849;R-HSA-114264;R-HSA-114284;R-HSA-139917	https://reactome.org/PathwayBrowser/#/R-HSA-109606
R-HSA-140877	Formation of Fibrin Clot (Clotting Cascade)	1	61	0.00414374	0.713454	0.713454	5	61	0.00461108	9606	Homo sapiens	KNG1		R-HSA-158354;R-HSA-158311;R-HSA-158218;R-HSA-158251;R-HSA-158313	https://reactome.org/PathwayBrowser/#/R-HSA-140877
R-HSA-913531	Interferon Signaling	7	401	0.02724	0.713875	0.713875	8	69	0.00521581	9606	Homo sapiens	SOCS3;PTAFR;GBP2;TRIM22		R-HSA-873918;R-HSA-912680;R-HSA-877269;R-HSA-1015702;R-HSA-1031716;R-HSA-909729;R-HSA-1015699;R-HSA-1031713	https://reactome.org/PathwayBrowser/#/R-HSA-913531
R-HSA-187577	SCF(Skp2)-mediated degradation of p27/p21	1	62	0.00421167	0.719278	0.719278	2	7	0.000529141	9606	Homo sapiens	CCND1		R-HSA-8848436;R-HSA-8848414	https://reactome.org/PathwayBrowser/#/R-HSA-187577
R-HSA-76002	Platelet activation, signaling and aggregation	5	296	0.0201073	0.724625	0.724625	6	115	0.00869302	9606	Homo sapiens	SERPINA3;LCK;SERPINF2;SLC5A11;KNG1		R-HSA-434836;R-HSA-417829;R-HSA-392195;R-HSA-481007;R-HSA-392187;R-HSA-392202	https://reactome.org/PathwayBrowser/#/R-HSA-76002
R-HSA-193648	NRAGE signals death through JNK	1	63	0.0042796	0.724983	0.724983	1	7	0.000529141	9606	Homo sapiens	FGD3		R-HSA-205039	https://reactome.org/PathwayBrowser/#/R-HSA-193648
R-HSA-5619102	SLC transporter disorders	3	185	0.0125671	0.730131	0.730131	5	65	0.00491345	9606	Homo sapiens	SLC7A7;SIT1;SLC40A1		R-HSA-5660694;R-HSA-5655733;R-HSA-5655760;R-HSA-5660910;R-HSA-5621402	https://reactome.org/PathwayBrowser/#/R-HSA-5619102
R-HSA-9607240	FLT3 Signaling	1	64	0.00434753	0.730573	0.730573	1	43	0.00325043	9606	Homo sapiens	LCK		R-HSA-9706312	https://reactome.org/PathwayBrowser/#/R-HSA-9607240
R-HSA-1592230	Mitochondrial biogenesis	2	127	0.00862713	0.733328	0.733328	13	36	0.00272129	9606	Homo sapiens	PPARGC1A		R-HSA-1592252;R-HSA-1605535;R-HSA-1592242;R-HSA-1605428;R-HSA-1592244;R-HSA-1592246;R-HSA-1592232;R-HSA-1592233;R-HSA-2466391;R-HSA-1592234;R-HSA-1592236;R-HSA-1368140;R-HSA-2466392	https://reactome.org/PathwayBrowser/#/R-HSA-1592230
R-HSA-381426	Regulation of Insulin-like Growth Factor (IGF) transport and uptake by Insulin-like Growth Factor Binding Proteins (IGFBPs)	2	127	0.00862713	0.733328	0.733328	2	14	0.00105828	9606	Homo sapiens	IGFBP1;KNG1		R-HSA-8952289;R-HSA-381487	https://reactome.org/PathwayBrowser/#/R-HSA-381426
R-HSA-429914	Deadenylation-dependent mRNA decay	1	65	0.00441546	0.73605	0.73605	4	10	0.000755915	9606	Homo sapiens	PAIP1		R-HSA-430021;R-HSA-429955;R-HSA-8941312;R-HSA-429992	https://reactome.org/PathwayBrowser/#/R-HSA-429914
R-HSA-1483166	Synthesis of PA	1	65	0.00441546	0.73605	0.73605	2	17	0.00128506	9606	Homo sapiens	PLA2G2A		R-HSA-1482679;R-HSA-1602446	https://reactome.org/PathwayBrowser/#/R-HSA-1483166
R-HSA-112399	IRS-mediated signalling	1	65	0.00441546	0.73605	0.73605	1	9	0.000680324	9606	Homo sapiens	KLB		R-HSA-109699	https://reactome.org/PathwayBrowser/#/R-HSA-112399
R-HSA-5621480	Dectin-2 family	1	65	0.00441546	0.73605	0.73605	1	12	0.000907098	9606	Homo sapiens	MUC3A		R-HSA-8858500	https://reactome.org/PathwayBrowser/#/R-HSA-5621480
R-HSA-6791312	TP53 Regulates Transcription of Cell Cycle Genes	1	65	0.00441546	0.73605	0.73605	1	42	0.00317484	9606	Homo sapiens	DHDH		R-HSA-6803892	https://reactome.org/PathwayBrowser/#/R-HSA-6791312
R-HSA-1433557	Signaling by SCF-KIT	1	66	0.00448339	0.741416	0.741416	19	39	0.00294807	9606	Homo sapiens	LCK		R-HSA-1433428;R-HSA-205319;R-HSA-1433488;R-HSA-1433456;R-HSA-1562641;R-HSA-1470012;R-HSA-1470010;R-HSA-1472121;R-HSA-1470009;R-HSA-205234;R-HSA-1433542;R-HSA-205238;R-HSA-205205;R-HSA-1433506;R-HSA-1433454;R-HSA-1433451;R-HSA-1433418;R-HSA-1433514;R-HSA-205244	https://reactome.org/PathwayBrowser/#/R-HSA-1433557
R-HSA-4608870	Asymmetric localization of PCP proteins	1	66	0.00448339	0.741416	0.741416	2	7	0.000529141	9606	Homo sapiens	FZD4		R-HSA-5099886;R-HSA-4608825	https://reactome.org/PathwayBrowser/#/R-HSA-4608870
R-HSA-373760	L1CAM interactions	2	130	0.00883092	0.745006	0.745006	2	54	0.00408194	9606	Homo sapiens	TUBB1;TUBA4B		R-HSA-445077;R-HSA-445071	https://reactome.org/PathwayBrowser/#/R-HSA-373760
R-HSA-909733	Interferon alpha/beta signaling	3	191	0.0129747	0.74961	0.74961	4	22	0.00166301	9606	Homo sapiens	SOCS3;GBP2		R-HSA-912680;R-HSA-1015702;R-HSA-909729;R-HSA-1015699	https://reactome.org/PathwayBrowser/#/R-HSA-909733
R-HSA-8873719	RAB geranylgeranylation	1	68	0.00461925	0.751824	0.751824	2	5	0.000377958	9606	Homo sapiens	RAB25		R-HSA-8870469;R-HSA-8870466	https://reactome.org/PathwayBrowser/#/R-HSA-8873719
R-HSA-5173105	O-linked glycosylation	2	132	0.00896678	0.752546	0.752546	18	28	0.00211656	9606	Homo sapiens	PDZK1;MUC3A		R-HSA-5694487;R-HSA-977071;R-HSA-977228;R-HSA-1964505;R-HSA-913675;R-HSA-1964501;R-HSA-914017;R-HSA-8931653;R-HSA-914018;R-HSA-914012;R-HSA-914008;R-HSA-914010;R-HSA-981497;R-HSA-914005;R-HSA-981814;R-HSA-914006;R-HSA-6786012;R-HSA-981809	https://reactome.org/PathwayBrowser/#/R-HSA-5173105
R-HSA-5578775	Ion homeostasis	1	69	0.00468718	0.75687	0.75687	2	16	0.00120946	9606	Homo sapiens	FXYD3		R-HSA-9684068;R-HSA-936897	https://reactome.org/PathwayBrowser/#/R-HSA-5578775
R-HSA-2428928	IRS-related events triggered by IGF1R	1	69	0.00468718	0.75687	0.75687	1	12	0.000907098	9606	Homo sapiens	KLB		R-HSA-109699	https://reactome.org/PathwayBrowser/#/R-HSA-2428928
R-HSA-373076	Class A/1 (Rhodopsin-like receptors)	8	475	0.0322668	0.757095	0.757095	9	158	0.0119435	9606	Homo sapiens	HCAR3;EDN2;PTGDR2;PTAFR;HTR1D;SLC5A11;KNG1;CCL26		R-HSA-419351;R-HSA-417829;R-HSA-443986;R-HSA-390929;R-HSA-388560;R-HSA-3296309;R-HSA-391934;R-HSA-374331;R-HSA-9611277	https://reactome.org/PathwayBrowser/#/R-HSA-373076
R-HSA-2500257	Resolution of Sister Chromatid Cohesion	2	134	0.00910264	0.759894	0.759894	4	8	0.000604732	9606	Homo sapiens	TUBB1;TUBA4B		R-HSA-2484822;R-HSA-1638803;R-HSA-2468287;R-HSA-1638821	https://reactome.org/PathwayBrowser/#/R-HSA-2500257
R-HSA-211976	Endogenous sterols	1	70	0.00475511	0.761814	0.761814	1	18	0.00136065	9606	Homo sapiens	CYP19A1		R-HSA-193060	https://reactome.org/PathwayBrowser/#/R-HSA-211976
R-HSA-8939211	ESR-mediated signaling	4	256	0.0173901	0.768847	0.768847	9	110	0.00831507	9606	Homo sapiens	MMP7;CCND1;HSPB8		R-HSA-9009065;R-HSA-9624272;R-HSA-9009371;R-HSA-9011949;R-HSA-9623355;R-HSA-9021072;R-HSA-9011952;R-HSA-9009378;R-HSA-9623341	https://reactome.org/PathwayBrowser/#/R-HSA-8939211
R-HSA-2219528	PI3K/AKT Signaling in Cancer	2	137	0.00930643	0.770563	0.770563	1	21	0.00158742	9606	Homo sapiens	KLB;LCK		R-HSA-2400009	https://reactome.org/PathwayBrowser/#/R-HSA-2219528
R-HSA-373755	Semaphorin interactions	1	72	0.00489097	0.771403	0.771403	8	41	0.00309925	9606	Homo sapiens	ACP5		R-HSA-399942;R-HSA-416725;R-HSA-399934;R-HSA-399951;R-HSA-399933;R-HSA-399946;R-HSA-399931;R-HSA-399944	https://reactome.org/PathwayBrowser/#/R-HSA-373755
R-HSA-191273	Cholesterol biosynthesis	1	72	0.00489097	0.771403	0.771403	2	32	0.00241893	9606	Homo sapiens	MSMO1		R-HSA-194641;R-HSA-194669	https://reactome.org/PathwayBrowser/#/R-HSA-191273
R-HSA-2428924	IGF1R signaling cascade	1	72	0.00489097	0.771403	0.771403	1	17	0.00128506	9606	Homo sapiens	KLB		R-HSA-109699	https://reactome.org/PathwayBrowser/#/R-HSA-2428924
R-HSA-5685942	HDR through Homologous Recombination (HRR)	1	72	0.00489097	0.771403	0.771403	1	19	0.00143624	9606	Homo sapiens	CYP17A1		R-HSA-5693561	https://reactome.org/PathwayBrowser/#/R-HSA-5685942
R-HSA-74751	Insulin receptor signalling cascade	1	72	0.00489097	0.771403	0.771403	1	25	0.00188979	9606	Homo sapiens	KLB		R-HSA-109699	https://reactome.org/PathwayBrowser/#/R-HSA-74751
R-HSA-202733	Cell surface interactions at the vascular wall	4	258	0.017526	0.774032	0.774032	3	65	0.00491345	9606	Homo sapiens	SLC7A7;LCK;ITGAL;SLC7A10		R-HSA-210291;R-HSA-202718;R-HSA-375131	https://reactome.org/PathwayBrowser/#/R-HSA-202733
R-HSA-913709	O-linked glycosylation of mucins	1	73	0.0049589	0.776052	0.776052	17	17	0.00128506	9606	Homo sapiens	MUC3A		R-HSA-5694487;R-HSA-977071;R-HSA-977228;R-HSA-1964505;R-HSA-913675;R-HSA-1964501;R-HSA-914017;R-HSA-914018;R-HSA-914012;R-HSA-914008;R-HSA-914010;R-HSA-981497;R-HSA-914005;R-HSA-981814;R-HSA-914006;R-HSA-6786012;R-HSA-981809	https://reactome.org/PathwayBrowser/#/R-HSA-913709
R-HSA-1793185	Chondroitin sulfate/dermatan sulfate metabolism	1	73	0.0049589	0.776052	0.776052	21	28	0.00211656	9606	Homo sapiens	BCAN		R-HSA-2022911;R-HSA-1971487;R-HSA-1889981;R-HSA-1793176;R-HSA-9638064;R-HSA-1971482;R-HSA-2018682;R-HSA-1971483;R-HSA-1889978;R-HSA-2065233;R-HSA-1878002;R-HSA-2022065;R-HSA-9632034;R-HSA-2022063;R-HSA-2022061;R-HSA-9632033;R-HSA-2022056;R-HSA-2022052;R-HSA-2018659;R-HSA-1971491;R-HSA-1889955	https://reactome.org/PathwayBrowser/#/R-HSA-1793185
R-HSA-2404192	Signaling by Type 1 Insulin-like Growth Factor 1 Receptor (IGF1R)	1	73	0.0049589	0.776052	0.776052	1	19	0.00143624	9606	Homo sapiens	KLB		R-HSA-109699	https://reactome.org/PathwayBrowser/#/R-HSA-2404192
R-HSA-163841	Gamma carboxylation, hypusine formation and arylsulfatase activation	1	74	0.00502683	0.780607	0.780607	3	40	0.00302366	9606	Homo sapiens	PROZ		R-HSA-163825;R-HSA-163798;R-HSA-163820	https://reactome.org/PathwayBrowser/#/R-HSA-163841
R-HSA-70326	Glucose metabolism	2	140	0.00951022	0.780818	0.780818	3	50	0.00377958	9606	Homo sapiens	G6PC;ALDOB		R-HSA-71825;R-HSA-71495;R-HSA-71496	https://reactome.org/PathwayBrowser/#/R-HSA-70326
R-HSA-211859	Biological oxidations	9	547	0.0371578	0.789063	0.789063	27	188	0.0142112	9606	Homo sapiens	SULT2B1;AOC3;CYP2B6;CYP2D6;CYP2E1;CYP19A1;UGT2B7;CYP3A7		R-HSA-76416;R-HSA-76354;R-HSA-211968;R-HSA-211910;R-HSA-176517;R-HSA-211983;R-HSA-174931;R-HSA-76434;R-HSA-211991;R-HSA-211988;R-HSA-211929;R-HSA-5696183;R-HSA-176609;R-HSA-76453;R-HSA-212005;R-HSA-193060;R-HSA-76456;R-HSA-211882;R-HSA-211881;R-HSA-176494;R-HSA-76397;R-HSA-143468;R-HSA-211948;R-HSA-213175;R-HSA-176631;R-HSA-76475;R-HSA-211966	https://reactome.org/PathwayBrowser/#/R-HSA-211859
R-HSA-936837	Ion transport by P-type ATPases	1	76	0.00516269	0.789442	0.789442	2	15	0.00113387	9606	Homo sapiens	FXYD3		R-HSA-9684068;R-HSA-936897	https://reactome.org/PathwayBrowser/#/R-HSA-936837
R-HSA-1650814	Collagen biosynthesis and modifying enzymes	1	76	0.00516269	0.789442	0.789442	1	51	0.00385517	9606	Homo sapiens	PCOLCE		R-HSA-2002440	https://reactome.org/PathwayBrowser/#/R-HSA-1650814
R-HSA-5576891	Cardiac conduction	2	143	0.00971401	0.790669	0.790669	3	27	0.00204097	9606	Homo sapiens	FXYD3;TRPV4		R-HSA-9684068;R-HSA-1296046;R-HSA-936897	https://reactome.org/PathwayBrowser/#/R-HSA-5576891
R-HSA-9678108	SARS-CoV-1 Infection	2	143	0.00971401	0.790669	0.790669	6	113	0.00854184	9606	Homo sapiens	ACE2;TMPRSS2		R-HSA-9678128;R-HSA-9686711;R-HSA-9695415;R-HSA-9686710;R-HSA-9686731;R-HSA-9681514	https://reactome.org/PathwayBrowser/#/R-HSA-9678108
R-HSA-187037	Signaling by NTRK1 (TRKA)	2	143	0.00971401	0.790669	0.790669	2	102	0.00771033	9606	Homo sapiens	ID2		R-HSA-9612534;R-HSA-9613476	https://reactome.org/PathwayBrowser/#/R-HSA-187037
R-HSA-9694516	SARS-CoV-2 Infection	2	144	0.00978194	0.793865	0.793865	7	116	0.00876861	9606	Homo sapiens	ACE2;TMPRSS2		R-HSA-9694579;R-HSA-9694661;R-HSA-9681514;R-HSA-9699007;R-HSA-9697423;R-HSA-9694287;R-HSA-9698988	https://reactome.org/PathwayBrowser/#/R-HSA-9694516
R-HSA-196854	Metabolism of vitamins and cofactors	6	383	0.0260173	0.796437	0.796437	10	206	0.0155718	9606	Homo sapiens	AKR1B10;AKR1C1;SLC52A3;ACP5;APOC3		R-HSA-196950;R-HSA-2404131;R-HSA-2404140;R-HSA-2424254;R-HSA-2395768;R-HSA-2395784;R-HSA-2423785;R-HSA-3165230;R-HSA-2429643;R-HSA-2855252	https://reactome.org/PathwayBrowser/#/R-HSA-196854
R-HSA-3906995	Diseases associated with O-glycosylation of proteins	1	78	0.00529855	0.797923	0.797923	3	9	0.000680324	9606	Homo sapiens	MUC3A		R-HSA-6785524;R-HSA-5096537;R-HSA-5096532	https://reactome.org/PathwayBrowser/#/R-HSA-3906995
R-HSA-9006931	Signaling by Nuclear Receptors	6	385	0.0261531	0.800411	0.800411	11	191	0.014438	9606	Homo sapiens	MMP7;CCND1;AKR1C1;HSPB8;ALDH8A1		R-HSA-9009065;R-HSA-5615668;R-HSA-9624272;R-HSA-9009371;R-HSA-5696101;R-HSA-9011949;R-HSA-9623355;R-HSA-9021072;R-HSA-9011952;R-HSA-9009378;R-HSA-9623341	https://reactome.org/PathwayBrowser/#/R-HSA-9006931
R-HSA-3000178	ECM proteoglycans	1	79	0.00536648	0.802034	0.802034	1	23	0.0017386	9606	Homo sapiens	BCAN		R-HSA-2424246	https://reactome.org/PathwayBrowser/#/R-HSA-3000178
R-HSA-75105	Fatty acyl-CoA biosynthesis	1	79	0.00536648	0.802034	0.802034	1	24	0.0018142	9606	Homo sapiens	ACSL6		R-HSA-201035	https://reactome.org/PathwayBrowser/#/R-HSA-75105
R-HSA-500792	GPCR ligand binding	11	665	0.0451736	0.802211	0.802211	12	185	0.0139844	9606	Homo sapiens	WNT6;ACE2;HCAR3;EDN2;PTGDR2;FZD4;PTAFR;HTR1D;SLC5A11;KNG1;CCL26		R-HSA-420214;R-HSA-419351;R-HSA-417829;R-HSA-443986;R-HSA-390929;R-HSA-388560;R-HSA-3296309;R-HSA-391934;R-HSA-374331;R-HSA-201708;R-HSA-9611277;R-HSA-420265	https://reactome.org/PathwayBrowser/#/R-HSA-500792
R-HSA-199992	trans-Golgi Network Vesicle Budding	1	80	0.00543441	0.806062	0.806062	4	19	0.00143624	9606	Homo sapiens	CTSZ		R-HSA-432706;R-HSA-432707;R-HSA-432688;R-HSA-432712	https://reactome.org/PathwayBrowser/#/R-HSA-199992
R-HSA-351202	Metabolism of polyamines	1	80	0.00543441	0.806062	0.806062	2	17	0.00128506	9606	Homo sapiens	GBP2		R-HSA-351207;R-HSA-351208	https://reactome.org/PathwayBrowser/#/R-HSA-351202
R-HSA-204998	Cell death signalling via NRAGE, NRIF and NADE	1	80	0.00543441	0.806062	0.806062	1	17	0.00128506	9606	Homo sapiens	FGD3		R-HSA-205039	https://reactome.org/PathwayBrowser/#/R-HSA-204998
R-HSA-8856688	Golgi-to-ER retrograde transport	2	148	0.0100537	0.806224	0.806224	4	18	0.00136065	9606	Homo sapiens	TUBB1;TUBA4B		R-HSA-8849350;R-HSA-6811426;R-HSA-6811423;R-HSA-8849353	https://reactome.org/PathwayBrowser/#/R-HSA-8856688
R-HSA-375276	Peptide ligand-binding receptors	3	211	0.0143333	0.806509	0.806509	3	76	0.00574495	9606	Homo sapiens	EDN2;KNG1;CCL26		R-HSA-443986;R-HSA-388560;R-HSA-374331	https://reactome.org/PathwayBrowser/#/R-HSA-375276
R-HSA-983712	Ion channel transport	3	212	0.0144012	0.809046	0.809046	4	44	0.00332603	9606	Homo sapiens	TTYH2;FXYD3;TRPV4		R-HSA-9684068;R-HSA-3295579;R-HSA-2744242;R-HSA-936897	https://reactome.org/PathwayBrowser/#/R-HSA-983712
R-HSA-5663220	RHO GTPases Activate Formins	2	149	0.0101216	0.809209	0.809209	1	27	0.00204097	9606	Homo sapiens	TUBB1;TUBA4B		R-HSA-5666169	https://reactome.org/PathwayBrowser/#/R-HSA-5663220
R-HSA-69473	G2/M DNA damage checkpoint	1	81	0.00550234	0.810009	0.810009	1	12	0.000907098	9606	Homo sapiens	CYP17A1		R-HSA-6799332	https://reactome.org/PathwayBrowser/#/R-HSA-69473
R-HSA-162909	Host Interactions of HIV factors	2	150	0.0101895	0.812153	0.812153	5	54	0.00408194	9606	Homo sapiens	CD8B;LCK		R-HSA-182198;R-HSA-182186;R-HSA-200954;R-HSA-182171;R-HSA-167566	https://reactome.org/PathwayBrowser/#/R-HSA-162909
R-HSA-1632852	Macroautophagy	2	150	0.0101895	0.812153	0.812153	4	87	0.00657646	9606	Homo sapiens	TUBB1;TUBA4B		R-HSA-9646679;R-HSA-9646390;R-HSA-9646383;R-HSA-9646685	https://reactome.org/PathwayBrowser/#/R-HSA-1632852
R-HSA-1236977	Endosomal/Vacuolar pathway	1	82	0.00557027	0.813876	0.813876	1	4	0.000302366	9606	Homo sapiens	CTSS		R-HSA-1236948	https://reactome.org/PathwayBrowser/#/R-HSA-1236977
R-HSA-917937	Iron uptake and transport	1	83	0.0056382	0.817664	0.817664	4	34	0.00257011	9606	Homo sapiens	SLC40A1		R-HSA-917933;R-HSA-904830;R-HSA-442368;R-HSA-917891	https://reactome.org/PathwayBrowser/#/R-HSA-917937
R-HSA-8939902	Regulation of RUNX2 expression and activity	1	83	0.0056382	0.817664	0.817664	2	32	0.00241893	9606	Homo sapiens	PPARGC1A		R-HSA-8939929;R-HSA-8939900	https://reactome.org/PathwayBrowser/#/R-HSA-8939902
R-HSA-5633008	TP53 Regulates Transcription of Cell Death Genes	1	83	0.0056382	0.817664	0.817664	1	68	0.00514022	9606	Homo sapiens	DHDH		R-HSA-3700984	https://reactome.org/PathwayBrowser/#/R-HSA-5633008
R-HSA-418594	G alpha (i) signalling events	9	565	0.0383805	0.818656	0.818656	11	165	0.0124726	9606	Homo sapiens	HCAR3;AKR1B10;PTGDR2;AKR1C1;HTR1D;SLC5A11;APOC3;KNG1		R-HSA-749454;R-HSA-2404131;R-HSA-2404140;R-HSA-2424254;R-HSA-749456;R-HSA-380073;R-HSA-2395768;R-HSA-2395784;R-HSA-2423785;R-HSA-2429643;R-HSA-2855252	https://reactome.org/PathwayBrowser/#/R-HSA-418594
R-HSA-1660661	Sphingolipid de novo biosynthesis	1	84	0.00570613	0.821375	0.821375	1	32	0.00241893	9606	Homo sapiens	FA2H		R-HSA-5693761	https://reactome.org/PathwayBrowser/#/R-HSA-1660661
R-HSA-9018519	Estrogen-dependent gene expression	2	154	0.0104612	0.82353	0.82353	5	66	0.00498904	9606	Homo sapiens	CCND1		R-HSA-9009065;R-HSA-9009371;R-HSA-9011949;R-HSA-9011952;R-HSA-9009378	https://reactome.org/PathwayBrowser/#/R-HSA-9018519
R-HSA-416482	G alpha (12/13) signalling events	1	87	0.00590992	0.832063	0.832063	1	15	0.00113387	9606	Homo sapiens	FGD3		R-HSA-419166	https://reactome.org/PathwayBrowser/#/R-HSA-416482
R-HSA-216083	Integrin cell surface interactions	1	87	0.00590992	0.832063	0.832063	2	55	0.00415753	9606	Homo sapiens	ITGAL		R-HSA-199050;R-HSA-202718	https://reactome.org/PathwayBrowser/#/R-HSA-216083
R-HSA-1638091	Heparan sulfate/heparin (HS-GAG) metabolism	1	88	0.00597785	0.835482	0.835482	5	33	0.00249452	9606	Homo sapiens	BCAN		R-HSA-1889981;R-HSA-9638064;R-HSA-1889978;R-HSA-1878002;R-HSA-1889955	https://reactome.org/PathwayBrowser/#/R-HSA-1638091
R-HSA-69202	Cyclin E associated events during G1/S transition	1	88	0.00597785	0.835482	0.835482	2	20	0.00151183	9606	Homo sapiens	CCND1		R-HSA-8848436;R-HSA-8848414	https://reactome.org/PathwayBrowser/#/R-HSA-69202
R-HSA-375280	Amine ligand-binding receptors	1	88	0.00597785	0.835482	0.835482	1	22	0.00166301	9606	Homo sapiens	HTR1D		R-HSA-390929	https://reactome.org/PathwayBrowser/#/R-HSA-375280
R-HSA-397014	Muscle contraction	3	224	0.0152164	0.837357	0.837357	7	42	0.00317484	9606	Homo sapiens	MYBPC1;FXYD3;TRPV4		R-HSA-390597;R-HSA-390598;R-HSA-390593;R-HSA-390595;R-HSA-9684068;R-HSA-1296046;R-HSA-936897	https://reactome.org/PathwayBrowser/#/R-HSA-397014
R-HSA-1912408	Pre-NOTCH Transcription and Translation	1	89	0.00604578	0.838831	0.838831	2	28	0.00211656	9606	Homo sapiens	CCND1		R-HSA-4395227;R-HSA-1912416	https://reactome.org/PathwayBrowser/#/R-HSA-1912408
R-HSA-5668914	Diseases of metabolism	6	408	0.0277155	0.841905	0.841905	16	191	0.014438	9606	Homo sapiens	BCAN;G6PC;ALDOB;CYP19A1;MUC3A;CYP17A1		R-HSA-5656438;R-HSA-3636919;R-HSA-5601843;R-HSA-5601849;R-HSA-4420365;R-HSA-3595175;R-HSA-3560804;R-HSA-6785524;R-HSA-5096537;R-HSA-3560802;R-HSA-5096532;R-HSA-9035954;R-HSA-3595178;R-HSA-9035956;R-HSA-3274540;R-HSA-3595176	https://reactome.org/PathwayBrowser/#/R-HSA-5668914
R-HSA-9679191	Potential therapeutics for SARS	2	161	0.0109368	0.84196	0.84196	2	32	0.00241893	9606	Homo sapiens	ACE2;FXYD3		R-HSA-9683488;R-HSA-9684068	https://reactome.org/PathwayBrowser/#/R-HSA-9679191
R-HSA-5693607	Processing of DNA double-strand break ends	1	90	0.00611372	0.842113	0.842113	4	17	0.00128506	9606	Homo sapiens	CYP17A1		R-HSA-5684887;R-HSA-5685156;R-HSA-5684882;R-HSA-5685011	https://reactome.org/PathwayBrowser/#/R-HSA-5693607
R-HSA-69656	Cyclin A:Cdk2-associated events at S phase entry	1	90	0.00611372	0.842113	0.842113	2	19	0.00143624	9606	Homo sapiens	CCND1		R-HSA-8848436;R-HSA-8848414	https://reactome.org/PathwayBrowser/#/R-HSA-69656
R-HSA-8856828	Clathrin-mediated endocytosis	2	162	0.0110047	0.844446	0.844446	18	35	0.0026457	9606	Homo sapiens	FZD4;SYT8		R-HSA-8868071;R-HSA-8863463;R-HSA-8868230;R-HSA-8867756;R-HSA-8868236;R-HSA-8868651;R-HSA-8866283;R-HSA-8867754;R-HSA-8868072;R-HSA-8868648;R-HSA-8868661;R-HSA-8868660;R-HSA-8868659;R-HSA-8868658;R-HSA-8869438;R-HSA-8866269;R-HSA-8871194;R-HSA-8871193	https://reactome.org/PathwayBrowser/#/R-HSA-8856828
R-HSA-1168372	Downstream signaling events of B Cell Receptor (BCR)	1	93	0.00631751	0.851564	0.851564	2	15	0.00113387	9606	Homo sapiens	RASGRP3		R-HSA-1168374;R-HSA-1168636	https://reactome.org/PathwayBrowser/#/R-HSA-1168372
R-HSA-450531	Regulation of mRNA stability by proteins that bind AU-rich elements	1	93	0.00631751	0.851564	0.851564	2	26	0.00196538	9606	Homo sapiens	HSPB8		R-HSA-450551;R-HSA-450580	https://reactome.org/PathwayBrowser/#/R-HSA-450531
R-HSA-3858494	Beta-catenin independent WNT signaling	2	166	0.0112764	0.85404	0.85404	12	51	0.00385517	9606	Homo sapiens	FZD4;PRKG1		R-HSA-5099886;R-HSA-5138459;R-HSA-5099899;R-HSA-5138441;R-HSA-4551453;R-HSA-3965444;R-HSA-3965446;R-HSA-3965447;R-HSA-3965441;R-HSA-5138432;R-HSA-4608825;R-HSA-5138433	https://reactome.org/PathwayBrowser/#/R-HSA-3858494
R-HSA-9612973	Autophagy	2	166	0.0112764	0.85404	0.85404	4	108	0.00816388	9606	Homo sapiens	TUBB1;TUBA4B		R-HSA-9646679;R-HSA-9646390;R-HSA-9646383;R-HSA-9646685	https://reactome.org/PathwayBrowser/#/R-HSA-9612973
R-HSA-1614635	Sulfur amino acid metabolism	1	94	0.00638544	0.854587	0.854587	1	37	0.00279689	9606	Homo sapiens	BHMT2		R-HSA-5696838	https://reactome.org/PathwayBrowser/#/R-HSA-1614635
R-HSA-2173782	Binding and Uptake of Ligands by Scavenger Receptors	2	167	0.0113443	0.856353	0.856353	5	33	0.00249452	9606	Homo sapiens	STAB1;HP		R-HSA-2168883;R-HSA-2168885;R-HSA-2230938;R-HSA-2247513;R-HSA-2197770	https://reactome.org/PathwayBrowser/#/R-HSA-2173782
R-HSA-6804756	Regulation of TP53 Activity through Phosphorylation	1	95	0.00645337	0.857549	0.857549	1	26	0.00196538	9606	Homo sapiens	CYP17A1		R-HSA-6799332	https://reactome.org/PathwayBrowser/#/R-HSA-6804756
R-HSA-74752	Signaling by Insulin receptor	1	97	0.00658923	0.863294	0.863294	1	34	0.00257011	9606	Homo sapiens	KLB		R-HSA-109699	https://reactome.org/PathwayBrowser/#/R-HSA-74752
R-HSA-4086400	PCP/CE pathway	1	99	0.00672509	0.868807	0.868807	7	24	0.0018142	9606	Homo sapiens	FZD4		R-HSA-5099886;R-HSA-5138459;R-HSA-5099899;R-HSA-5138441;R-HSA-5138432;R-HSA-4608825;R-HSA-5138433	https://reactome.org/PathwayBrowser/#/R-HSA-4086400
R-HSA-388841	Costimulation by the CD28 family	1	100	0.00679302	0.87148	0.87148	14	35	0.0026457	9606	Homo sapiens	LCK		R-HSA-389381;R-HSA-389348;R-HSA-389158;R-HSA-389350;R-HSA-388833;R-HSA-388832;R-HSA-389762;R-HSA-388814;R-HSA-389352;R-HSA-389354;R-HSA-388829;R-HSA-388831;R-HSA-389759;R-HSA-389758	https://reactome.org/PathwayBrowser/#/R-HSA-388841
R-HSA-2682334	EPH-Ephrin signaling	1	101	0.00686095	0.874099	0.874099	14	56	0.00423312	9606	Homo sapiens	EPHA1		R-HSA-3928602;R-HSA-3928607;R-HSA-3928604;R-HSA-3928597;R-HSA-3928628;R-HSA-3928660;R-HSA-3928651;R-HSA-4093327;R-HSA-3928584;R-HSA-3928648;R-HSA-3928591;R-HSA-3928642;R-HSA-3928578;R-HSA-3928646	https://reactome.org/PathwayBrowser/#/R-HSA-2682334
R-HSA-5668541	TNFR2 non-canonical NF-kB pathway	1	104	0.00706474	0.881641	0.881641	8	43	0.00325043	9606	Homo sapiens	TNFSF14		R-HSA-5668454;R-HSA-5668534;R-HSA-5668789;R-HSA-5676593;R-HSA-5668481;R-HSA-5668414;R-HSA-5676591;R-HSA-5675948	https://reactome.org/PathwayBrowser/#/R-HSA-5668541
R-HSA-2168880	Scavenging of heme from plasma	1	106	0.0072006	0.886417	0.886417	3	12	0.000907098	9606	Homo sapiens	HP		R-HSA-2168883;R-HSA-2168885;R-HSA-2230938	https://reactome.org/PathwayBrowser/#/R-HSA-2168880
R-HSA-5687128	MAPK6/MAPK4 signaling	1	106	0.0072006	0.886417	0.886417	1	40	0.00302366	9606	Homo sapiens	HSPB8		R-HSA-5687121	https://reactome.org/PathwayBrowser/#/R-HSA-5687128
R-HSA-112316	Neuronal System	7	501	0.034033	0.888664	0.888664	11	216	0.0163278	9606	Homo sapiens	ACE2;TRPV4;TUBB1;SLC6A12;IL1RAP;TUBA4B		R-HSA-9610627;R-HSA-444007;R-HSA-9619542;R-HSA-8849891;R-HSA-352029;R-HSA-9610408;R-HSA-8849900;R-HSA-6800380;R-HSA-1296046;R-HSA-8849882;R-HSA-8849881	https://reactome.org/PathwayBrowser/#/R-HSA-112316
R-HSA-190236	Signaling by FGFR	1	107	0.00726853	0.888732	0.888732	27	142	0.010734	9606	Homo sapiens	KLB		R-HSA-5654422;R-HSA-5654423;R-HSA-5654418;R-HSA-5654163;R-HSA-5654428;R-HSA-5654684;R-HSA-5654426;R-HSA-5654169;R-HSA-5654425;R-HSA-5654662;R-HSA-5654151;R-HSA-5654663;R-HSA-5654658;R-HSA-5654659;R-HSA-5654734;R-HSA-5654669;R-HSA-5654667;R-HSA-5654664;R-HSA-1307955;R-HSA-8941613;R-HSA-1307963;R-HSA-5654655;R-HSA-5654717;R-HSA-5654653;R-HSA-5654714;R-HSA-5654651;R-HSA-5654566	https://reactome.org/PathwayBrowser/#/R-HSA-190236
R-HSA-1296071	Potassium Channels	1	107	0.00726853	0.888732	0.888732	1	19	0.00143624	9606	Homo sapiens	TRPV4		R-HSA-1296046	https://reactome.org/PathwayBrowser/#/R-HSA-1296071
R-HSA-198933	Immunoregulatory interactions between a Lymphoid and a non-Lymphoid cell	4	317	0.0215339	0.889502	0.889502	4	44	0.00332603	9606	Homo sapiens	CD8B;SLC6A12;ITGAL;OSCAR		R-HSA-199154;R-HSA-5696356;R-HSA-198955;R-HSA-199050	https://reactome.org/PathwayBrowser/#/R-HSA-198933
R-HSA-193704	p75 NTR receptor-mediated signalling	1	109	0.00740439	0.893223	0.893223	1	50	0.00377958	9606	Homo sapiens	FGD3		R-HSA-205039	https://reactome.org/PathwayBrowser/#/R-HSA-193704
R-HSA-70171	Glycolysis	1	110	0.00747232	0.8954	0.8954	1	24	0.0018142	9606	Homo sapiens	ALDOB		R-HSA-71496	https://reactome.org/PathwayBrowser/#/R-HSA-70171
R-HSA-1483255	PI Metabolism	1	112	0.00760818	0.899623	0.899623	3	89	0.00672764	9606	Homo sapiens	SACM1L		R-HSA-1676124;R-HSA-1676114;R-HSA-1676133	https://reactome.org/PathwayBrowser/#/R-HSA-1483255
R-HSA-156580	Phase II - Conjugation of compounds	3	259	0.0175939	0.900193	0.900193	5	72	0.00544259	9606	Homo sapiens	SULT2B1;UGT2B7		R-HSA-174931;R-HSA-176609;R-HSA-176631;R-HSA-176517;R-HSA-176494	https://reactome.org/PathwayBrowser/#/R-HSA-156580
R-HSA-1912422	Pre-NOTCH Expression and Processing	1	113	0.00767611	0.90167	0.90167	2	38	0.00287248	9606	Homo sapiens	CCND1		R-HSA-4395227;R-HSA-1912416	https://reactome.org/PathwayBrowser/#/R-HSA-1912422
R-HSA-8878171	Transcriptional regulation by RUNX1	3	261	0.0177298	0.90302	0.90302	4	132	0.00997808	9606	Homo sapiens	SOCS3;CCND1		R-HSA-8955885;R-HSA-8938867;R-HSA-8955748;R-HSA-8865320	https://reactome.org/PathwayBrowser/#/R-HSA-8878171
R-HSA-983231	Factors involved in megakaryocyte development and platelet production	2	194	0.0131785	0.907423	0.907423	2	43	0.00325043	9606	Homo sapiens	TUBB1;TUBA4B		R-HSA-983259;R-HSA-983266	https://reactome.org/PathwayBrowser/#/R-HSA-983231
R-HSA-2467813	Separation of Sister Chromatids	2	195	0.0132464	0.908942	0.908942	2	8	0.000604732	9606	Homo sapiens	TUBB1;TUBA4B		R-HSA-2467809;R-HSA-2467811	https://reactome.org/PathwayBrowser/#/R-HSA-2467813
R-HSA-195721	Signaling by WNT	4	332	0.0225528	0.909033	0.909033	26	157	0.0118679	9606	Homo sapiens	WNT6;FZD4;DKK1;PRKG1		R-HSA-3769401;R-HSA-5138441;R-HSA-3781941;R-HSA-5138432;R-HSA-3781943;R-HSA-5138433;R-HSA-3247840;R-HSA-4641236;R-HSA-3238691;R-HSA-3247843;R-HSA-5138459;R-HSA-3247844;R-HSA-3238694;R-HSA-4551453;R-HSA-5368586;R-HSA-4641253;R-HSA-5099886;R-HSA-4641249;R-HSA-3247837;R-HSA-1458875;R-HSA-5099899;R-HSA-3965444;R-HSA-3965446;R-HSA-3965447;R-HSA-3965441;R-HSA-4608825	https://reactome.org/PathwayBrowser/#/R-HSA-195721
R-HSA-211000	Gene Silencing by RNA	1	117	0.00794783	0.90945	0.90945	7	36	0.00272129	9606	Homo sapiens	PIWIL2		R-HSA-5601910;R-HSA-5603062;R-HSA-5601922;R-HSA-5629218;R-HSA-5601929;R-HSA-5601883;R-HSA-5603067	https://reactome.org/PathwayBrowser/#/R-HSA-211000
R-HSA-1852241	Organelle biogenesis and maintenance	4	335	0.0227566	0.912552	0.912552	21	86	0.00650087	9606	Homo sapiens	TUBB1;PPARGC1A;TUBA4B		R-HSA-5624949;R-HSA-1592252;R-HSA-5625424;R-HSA-1605535;R-HSA-5625426;R-HSA-1592242;R-HSA-1605428;R-HSA-1592244;R-HSA-5618328;R-HSA-5624952;R-HSA-1592246;R-HSA-5618331;R-HSA-1592232;R-HSA-1592233;R-HSA-2466391;R-HSA-1592234;R-HSA-1592236;R-HSA-1368140;R-HSA-5625421;R-HSA-2466392;R-HSA-5625416	https://reactome.org/PathwayBrowser/#/R-HSA-1852241
R-HSA-3781865	Diseases of glycosylation	2	202	0.0137219	0.918942	0.918942	10	77	0.00582055	9606	Homo sapiens	BCAN;MUC3A		R-HSA-3636919;R-HSA-3595175;R-HSA-3560804;R-HSA-6785524;R-HSA-5096537;R-HSA-3560802;R-HSA-5096532;R-HSA-3595178;R-HSA-4420365;R-HSA-3595176	https://reactome.org/PathwayBrowser/#/R-HSA-3781865
R-HSA-418346	Platelet homeostasis	1	123	0.00835541	0.919985	0.919985	3	30	0.00226775	9606	Homo sapiens	PRKG1		R-HSA-418549;R-HSA-418451;R-HSA-418442	https://reactome.org/PathwayBrowser/#/R-HSA-418346
R-HSA-109582	Hemostasis	12	831	0.05645	0.921113	0.921113	21	333	0.025172	9606	Homo sapiens	SERPINA3;SLC7A7;SERPINB2;LCK;TUBB1;SERPINF2;SLC5A11;ITGAL;SLC7A10;TUBA4B;PRKG1;KNG1		R-HSA-417829;R-HSA-158311;R-HSA-392195;R-HSA-481007;R-HSA-158218;R-HSA-158251;R-HSA-158313;R-HSA-418442;R-HSA-983266;R-HSA-392202;R-HSA-158893;R-HSA-210291;R-HSA-158354;R-HSA-434836;R-HSA-418549;R-HSA-983259;R-HSA-418451;R-HSA-159001;R-HSA-202718;R-HSA-392187;R-HSA-375131	https://reactome.org/PathwayBrowser/#/R-HSA-109582
R-HSA-5693567	HDR through Homologous Recombination (HRR) or Single Strand Annealing (SSA)	1	124	0.00842334	0.921618	0.921618	9	42	0.00317484	9606	Homo sapiens	CYP17A1		R-HSA-5684887;R-HSA-5685156;R-HSA-5684882;R-HSA-5686642;R-HSA-5685011;R-HSA-5686657;R-HSA-5693564;R-HSA-5693580;R-HSA-5693561	https://reactome.org/PathwayBrowser/#/R-HSA-5693567
R-HSA-5610787	Hedgehog 'off' state	1	124	0.00842334	0.921618	0.921618	2	32	0.00241893	9606	Homo sapiens	TUBB1		R-HSA-5610733;R-HSA-5610767	https://reactome.org/PathwayBrowser/#/R-HSA-5610787
R-HSA-202424	Downstream TCR signaling	1	124	0.00842334	0.921618	0.921618	1	24	0.0018142	9606	Homo sapiens	LCK		R-HSA-202307	https://reactome.org/PathwayBrowser/#/R-HSA-202424
R-HSA-5619115	Disorders of transmembrane transporters	3	280	0.0190204	0.92648	0.92648	5	87	0.00657646	9606	Homo sapiens	SLC7A7;SIT1;SLC40A1		R-HSA-5660694;R-HSA-5655733;R-HSA-5655760;R-HSA-5660910;R-HSA-5621402	https://reactome.org/PathwayBrowser/#/R-HSA-5619115
R-HSA-5617833	Cilium Assembly	2	208	0.0141295	0.926684	0.926684	8	50	0.00377958	9606	Homo sapiens	TUBB1;TUBA4B		R-HSA-5624949;R-HSA-5625424;R-HSA-5625426;R-HSA-5625421;R-HSA-5618328;R-HSA-5624952;R-HSA-5625416;R-HSA-5618331	https://reactome.org/PathwayBrowser/#/R-HSA-5617833
R-HSA-416476	G alpha (q) signalling events	3	283	0.0192242	0.92967	0.92967	3	35	0.0026457	9606	Homo sapiens	EDN2;PTAFR;KNG1		R-HSA-749448;R-HSA-749452;R-HSA-379048	https://reactome.org/PathwayBrowser/#/R-HSA-416476
R-HSA-68877	Mitotic Prometaphase	2	211	0.0143333	0.930289	0.930289	8	20	0.00151183	9606	Homo sapiens	TUBB1;TUBA4B		R-HSA-9648114;R-HSA-9648017;R-HSA-2484822;R-HSA-375302;R-HSA-380316;R-HSA-1638803;R-HSA-2468287;R-HSA-1638821	https://reactome.org/PathwayBrowser/#/R-HSA-68877
R-HSA-5693538	Homology Directed Repair	1	130	0.00883092	0.930742	0.930742	9	50	0.00377958	9606	Homo sapiens	CYP17A1		R-HSA-5684887;R-HSA-5685156;R-HSA-5684882;R-HSA-5686642;R-HSA-5685011;R-HSA-5686657;R-HSA-5693564;R-HSA-5693580;R-HSA-5693561	https://reactome.org/PathwayBrowser/#/R-HSA-5693538
R-HSA-69275	G2/M Transition	2	212	0.0144012	0.931453	0.931453	3	78	0.00589614	9606	Homo sapiens	TUBB1;TUBA4B		R-HSA-8852306;R-HSA-8852298;R-HSA-8852280	https://reactome.org/PathwayBrowser/#/R-HSA-69275
R-HSA-112315	Transmission across Chemical Synapses	4	355	0.0241152	0.933069	0.933069	5	163	0.0123214	9606	Homo sapiens	TUBB1;SLC6A12;TUBA4B		R-HSA-9610627;R-HSA-444007;R-HSA-9619542;R-HSA-352029;R-HSA-9610408	https://reactome.org/PathwayBrowser/#/R-HSA-112315
R-HSA-453274	Mitotic G2-G2/M phases	2	214	0.0145371	0.933726	0.933726	3	80	0.00604732	9606	Homo sapiens	TUBB1;TUBA4B		R-HSA-8852306;R-HSA-8852298;R-HSA-8852280	https://reactome.org/PathwayBrowser/#/R-HSA-453274
R-HSA-9609690	HCMV Early Events	2	215	0.014605	0.934835	0.934835	2	12	0.000907098	9606	Homo sapiens	TUBB1;TUBA4B		R-HSA-9614343;R-HSA-9614367	https://reactome.org/PathwayBrowser/#/R-HSA-9609690
R-HSA-4420097	VEGFA-VEGFR2 Pathway	1	133	0.00903471	0.934898	0.934898	1	79	0.00597173	9606	Homo sapiens	HSPB8		R-HSA-5218916	https://reactome.org/PathwayBrowser/#/R-HSA-4420097
R-HSA-201681	TCF dependent signaling in response to WNT	2	216	0.0146729	0.935928	0.935928	6	71	0.005367	9606	Homo sapiens	FZD4;DKK1		R-HSA-3769401;R-HSA-4641236;R-HSA-4641253;R-HSA-4641249;R-HSA-5368586;R-HSA-1458875	https://reactome.org/PathwayBrowser/#/R-HSA-201681
R-HSA-3371556	Cellular response to heat stress	1	135	0.00917057	0.937531	0.937531	1	29	0.00219215	9606	Homo sapiens	HSPB8		R-HSA-5082356	https://reactome.org/PathwayBrowser/#/R-HSA-3371556
R-HSA-6811442	Intra-Golgi and retrograde Golgi-to-ER traffic	2	218	0.0148088	0.93806	0.93806	4	48	0.00362839	9606	Homo sapiens	TUBB1;TUBA4B		R-HSA-8849350;R-HSA-6811426;R-HSA-6811423;R-HSA-8849353	https://reactome.org/PathwayBrowser/#/R-HSA-6811442
R-HSA-977606	Regulation of Complement cascade	1	139	0.00944229	0.942481	0.942481	3	42	0.00317484	9606	Homo sapiens	C8B		R-HSA-8852580;R-HSA-2530429;R-HSA-2530445	https://reactome.org/PathwayBrowser/#/R-HSA-977606
R-HSA-8956319	Nucleobase catabolism	1	139	0.00944229	0.942481	0.942481	2	58	0.00438431	9606	Homo sapiens	UPB1		R-HSA-73620;R-HSA-73591	https://reactome.org/PathwayBrowser/#/R-HSA-8956319
R-HSA-194138	Signaling by VEGF	1	144	0.00978194	0.948122	0.948122	1	86	0.00650087	9606	Homo sapiens	HSPB8		R-HSA-5218916	https://reactome.org/PathwayBrowser/#/R-HSA-194138
R-HSA-112314	Neurotransmitter receptors and postsynaptic signal transmission	2	232	0.0157598	0.95121	0.95121	3	109	0.00823947	9606	Homo sapiens	TUBB1;TUBA4B		R-HSA-9610627;R-HSA-9619542;R-HSA-9610408	https://reactome.org/PathwayBrowser/#/R-HSA-112314
R-HSA-202403	TCR signaling	1	147	0.00998573	0.951238	0.951238	13	52	0.00393076	9606	Homo sapiens	LCK		R-HSA-202307;R-HSA-202214;R-HSA-202245;R-HSA-202248;R-HSA-202216;R-HSA-202344;R-HSA-8852200;R-HSA-202291;R-HSA-8855381;R-HSA-202165;R-HSA-202233;R-HSA-202168;R-HSA-202174	https://reactome.org/PathwayBrowser/#/R-HSA-202403
R-HSA-69206	G1/S Transition	1	150	0.0101895	0.954168	0.954168	2	61	0.00461108	9606	Homo sapiens	CCND1		R-HSA-8848436;R-HSA-8848414	https://reactome.org/PathwayBrowser/#/R-HSA-69206
R-HSA-983168	Antigen processing: Ubiquitination & Proteasome degradation	3	315	0.021398	0.956614	0.956614	4	9	0.000680324	9606	Homo sapiens	SOCS3;RNF144B;TRIM50		R-HSA-983147;R-HSA-983157;R-HSA-983156;R-HSA-983140	https://reactome.org/PathwayBrowser/#/R-HSA-983168
R-HSA-69481	G2/M Checkpoints	1	154	0.0104612	0.957804	0.957804	1	24	0.0018142	9606	Homo sapiens	CYP17A1		R-HSA-6799332	https://reactome.org/PathwayBrowser/#/R-HSA-69481
R-HSA-1257604	PIP3 activates AKT signaling	3	319	0.0216697	0.959204	0.959204	2	86	0.00650087	9606	Homo sapiens	KLB;LCK;IL1RAP		R-HSA-2316434;R-HSA-8857925	https://reactome.org/PathwayBrowser/#/R-HSA-1257604
R-HSA-166658	Complement cascade	1	156	0.0105971	0.959512	0.959512	7	71	0.005367	9606	Homo sapiens	C8B		R-HSA-8852580;R-HSA-173723;R-HSA-173720;R-HSA-2530429;R-HSA-2530445;R-HSA-173725;R-HSA-173709	https://reactome.org/PathwayBrowser/#/R-HSA-166658
R-HSA-73887	Death Receptor Signalling	1	158	0.010733	0.961151	0.961151	1	93	0.00703001	9606	Homo sapiens	FGD3		R-HSA-205039	https://reactome.org/PathwayBrowser/#/R-HSA-73887
R-HSA-9660821	ADORA2B mediated anti-inflammatory cytokines production	1	159	0.0108009	0.961946	0.961946	1	12	0.000907098	9606	Homo sapiens	ACE2		R-HSA-9660824	https://reactome.org/PathwayBrowser/#/R-HSA-9660821
R-HSA-194840	Rho GTPase cycle	1	160	0.0108688	0.962725	0.962725	1	12	0.000907098	9606	Homo sapiens	FGD3		R-HSA-194913	https://reactome.org/PathwayBrowser/#/R-HSA-194840
R-HSA-68882	Mitotic Anaphase	2	249	0.0169146	0.963619	0.963619	3	32	0.00241893	9606	Homo sapiens	TUBB1;TUBA4B		R-HSA-9668419;R-HSA-2467809;R-HSA-2467811	https://reactome.org/PathwayBrowser/#/R-HSA-68882
R-HSA-428157	Sphingolipid metabolism	1	162	0.0110047	0.964235	0.964235	1	64	0.00483786	9606	Homo sapiens	FA2H		R-HSA-5693761	https://reactome.org/PathwayBrowser/#/R-HSA-428157
R-HSA-2555396	Mitotic Metaphase and Anaphase	2	250	0.0169825	0.964246	0.964246	3	33	0.00249452	9606	Homo sapiens	TUBB1;TUBA4B		R-HSA-9668419;R-HSA-2467809;R-HSA-2467811	https://reactome.org/PathwayBrowser/#/R-HSA-2555396
R-HSA-9679506	SARS-CoV Infections	3	328	0.0222811	0.964513	0.964513	14	255	0.0192758	9606	Homo sapiens	ACE2;FXYD3;TMPRSS2		R-HSA-9694579;R-HSA-9678128;R-HSA-9686711;R-HSA-9695415;R-HSA-9686710;R-HSA-9699007;R-HSA-9683488;R-HSA-9694661;R-HSA-9684068;R-HSA-9686731;R-HSA-9681514;R-HSA-9697423;R-HSA-9694287;R-HSA-9698988	https://reactome.org/PathwayBrowser/#/R-HSA-9679506
R-HSA-196849	Metabolism of water-soluble vitamins and cofactors	2	255	0.0173222	0.967228	0.967228	2	144	0.0108852	9606	Homo sapiens	SLC52A3;ACP5		R-HSA-196950;R-HSA-3165230	https://reactome.org/PathwayBrowser/#/R-HSA-196849
R-HSA-5693532	DNA Double-Strand Break Repair	1	168	0.0114123	0.968408	0.968408	9	111	0.00839066	9606	Homo sapiens	CYP17A1		R-HSA-5684887;R-HSA-5685156;R-HSA-5684882;R-HSA-5686642;R-HSA-5685011;R-HSA-5686657;R-HSA-5693564;R-HSA-5693580;R-HSA-5693561	https://reactome.org/PathwayBrowser/#/R-HSA-5693532
R-HSA-5358351	Signaling by Hedgehog	1	168	0.0114123	0.968408	0.968408	2	82	0.0061985	9606	Homo sapiens	TUBB1		R-HSA-5610733;R-HSA-5610767	https://reactome.org/PathwayBrowser/#/R-HSA-5358351
R-HSA-453279	Mitotic G1 phase and G1/S transition	1	173	0.0117519	0.971512	0.971512	11	99	0.00748356	9606	Homo sapiens	CCND1		R-HSA-8941915;R-HSA-8848436;R-HSA-8942607;R-HSA-9018017;R-HSA-8848414;R-HSA-69227;R-HSA-8942803;R-HSA-1226094;R-HSA-8942836;R-HSA-1226095;R-HSA-8941895	https://reactome.org/PathwayBrowser/#/R-HSA-453279
R-HSA-1280218	Adaptive Immune System	13	1003	0.068134	0.973183	0.973183	43	264	0.0199562	9606	Homo sapiens	TRIM50;SLC6A12;ITGAL;TUBA4B;CTSS;OSCAR;RASGRP3;SOCS3;RNF144B;CD8B;LCK;TUBB1;PRKG1		R-HSA-389381;R-HSA-202307;R-HSA-913996;R-HSA-202245;R-HSA-1236948;R-HSA-389762;R-HSA-199050;R-HSA-388814;R-HSA-202248;R-HSA-2130349;R-HSA-8855381;R-HSA-388829;R-HSA-388831;R-HSA-2213248;R-HSA-389348;R-HSA-389158;R-HSA-389350;R-HSA-983147;R-HSA-388833;R-HSA-202214;R-HSA-388832;R-HSA-1168374;R-HSA-2130504;R-HSA-198955;R-HSA-983140;R-HSA-202216;R-HSA-202344;R-HSA-1168636;R-HSA-389352;R-HSA-389354;R-…	https://reactome.org/PathwayBrowser/#/R-HSA-1280218
R-HSA-162906	HIV Infection	2	267	0.0181374	0.973442	0.973442	5	160	0.0120946	9606	Homo sapiens	CD8B;LCK		R-HSA-182198;R-HSA-182186;R-HSA-200954;R-HSA-182171;R-HSA-167566	https://reactome.org/PathwayBrowser/#/R-HSA-162906
R-HSA-446203	Asparagine N-linked glycosylation	4	421	0.0285986	0.973613	0.973613	18	144	0.0108852	9606	Homo sapiens	CTSZ;TUBB1;TUBA4B;FOLR1		R-HSA-6807877;R-HSA-5694418;R-HSA-6807875;R-HSA-203973;R-HSA-5694417;R-HSA-6809006;R-HSA-5694527;R-HSA-5694428;R-HSA-204008;R-HSA-6809003;R-HSA-5694522;R-HSA-5694439;R-HSA-6809011;R-HSA-6809010;R-HSA-5694446;R-HSA-5694410;R-HSA-5694441;R-HSA-5694409	https://reactome.org/PathwayBrowser/#/R-HSA-446203
R-HSA-5633007	Regulation of TP53 Activity	1	178	0.0120916	0.974312	0.974312	1	98	0.00740797	9606	Homo sapiens	CYP17A1		R-HSA-6799332	https://reactome.org/PathwayBrowser/#/R-HSA-5633007
R-HSA-9609646	HCMV Infection	2	270	0.0183411	0.974809	0.974809	2	31	0.00234334	9606	Homo sapiens	TUBB1;TUBA4B		R-HSA-9614343;R-HSA-9614367	https://reactome.org/PathwayBrowser/#/R-HSA-9609646
R-HSA-69242	S Phase	1	180	0.0122274	0.975354	0.975354	7	54	0.00408194	9606	Homo sapiens	CCND1		R-HSA-75825;R-HSA-75824;R-HSA-8848436;R-HSA-8848414;R-HSA-75820;R-HSA-75823;R-HSA-75822	https://reactome.org/PathwayBrowser/#/R-HSA-69242
R-HSA-1630316	Glycosaminoglycan metabolism	1	182	0.0123633	0.976354	0.976354	21	88	0.00665205	9606	Homo sapiens	BCAN		R-HSA-2022911;R-HSA-1971487;R-HSA-1889981;R-HSA-1793176;R-HSA-9638064;R-HSA-1971482;R-HSA-2018682;R-HSA-1971483;R-HSA-1889978;R-HSA-2065233;R-HSA-1878002;R-HSA-2022065;R-HSA-9632034;R-HSA-2022063;R-HSA-2022061;R-HSA-9632033;R-HSA-2022056;R-HSA-2022052;R-HSA-2018659;R-HSA-1971491;R-HSA-1889955	https://reactome.org/PathwayBrowser/#/R-HSA-1630316
R-HSA-8978868	Fatty acid metabolism	4	429	0.029142	0.976534	0.976534	5	217	0.0164034	9606	Homo sapiens	AKR1C1;ACSL6;PTGR1;PTGES		R-HSA-201035;R-HSA-2161660;R-HSA-2161549;R-HSA-2161614;R-HSA-2161567	https://reactome.org/PathwayBrowser/#/R-HSA-8978868
R-HSA-3108232	SUMO E3 ligases SUMOylate target proteins	1	183	0.0124312	0.976838	0.976838	1	131	0.00990249	9606	Homo sapiens	PPARGC1A		R-HSA-3903017	https://reactome.org/PathwayBrowser/#/R-HSA-3108232
R-HSA-168898	Toll-like Receptor Cascades	1	185	0.0125671	0.977778	0.977778	2	185	0.0139844	9606	Homo sapiens	CTSS		R-HSA-1678920;R-HSA-1678981	https://reactome.org/PathwayBrowser/#/R-HSA-168898
R-HSA-1236975	Antigen processing-Cross presentation	1	187	0.0127029	0.978679	0.978679	1	23	0.0017386	9606	Homo sapiens	CTSS		R-HSA-1236948	https://reactome.org/PathwayBrowser/#/R-HSA-1236975
R-HSA-109581	Apoptosis	1	189	0.0128388	0.979544	0.979544	6	141	0.0106584	9606	Homo sapiens	DHDH		R-HSA-114307;R-HSA-114275;R-HSA-168849;R-HSA-114264;R-HSA-114284;R-HSA-139917	https://reactome.org/PathwayBrowser/#/R-HSA-109581
R-HSA-556833	Metabolism of lipids	20	1451	0.0985667	0.980133	0.980133	46	947	0.0715852	9606	Homo sapiens	SACM1L;AKR1C1;PLA2G2A;ACSL6;AKR1C2;MSMO1;PTGR1;BAAT;CYP19A1;CYP17A1;FA2H;AKR1B10;CYP2D6;AKR1B15;HSD17B2;ANGPTL4;CYP2E1;PPARGC1A;PTGES		R-HSA-159431;R-HSA-1676124;R-HSA-1602398;R-HSA-201035;R-HSA-193099;R-HSA-193800;R-HSA-1676114;R-HSA-560517;R-HSA-1482907;R-HSA-1482776;R-HSA-193491;R-HSA-560473;R-HSA-1482887;R-HSA-1602377;R-HSA-194641;R-HSA-2161844;R-HSA-1482816;R-HSA-1602446;R-HSA-5693761;R-HSA-1602368;R-HSA-2161660;R-HSA-193758;R-HSA-1602374;R-HSA-5696822;R-HSA-1482679;R-HSA-192160;R-HSA-1482868;R-HSA-192036;R-HSA-193060;R-HSA…	https://reactome.org/PathwayBrowser/#/R-HSA-556833
R-HSA-983705	Signaling by the B Cell Receptor (BCR)	1	191	0.0129747	0.980375	0.980375	2	44	0.00332603	9606	Homo sapiens	RASGRP3		R-HSA-1168374;R-HSA-1168636	https://reactome.org/PathwayBrowser/#/R-HSA-983705
R-HSA-9006925	Intracellular signaling by second messengers	3	366	0.0248624	0.980551	0.980551	2	114	0.00861743	9606	Homo sapiens	KLB;LCK;IL1RAP		R-HSA-2316434;R-HSA-8857925	https://reactome.org/PathwayBrowser/#/R-HSA-9006925
R-HSA-2990846	SUMOylation	1	192	0.0130426	0.980777	0.980777	1	140	0.0105828	9606	Homo sapiens	PPARGC1A		R-HSA-3903017	https://reactome.org/PathwayBrowser/#/R-HSA-2990846
R-HSA-71291	Metabolism of amino acids and derivatives	7	661	0.0449018	0.982821	0.982821	9	285	0.0215436	9606	Homo sapiens	HAL;DAO;BHMT2;DIO1;SLC6A12;HAO1;GBP2		R-HSA-5696838;R-HSA-351207;R-HSA-70899;R-HSA-389862;R-HSA-389842;R-HSA-389821;R-HSA-351208;R-HSA-209772;R-HSA-200396	https://reactome.org/PathwayBrowser/#/R-HSA-71291
R-HSA-71387	Metabolism of carbohydrates	4	456	0.0309762	0.984305	0.984305	26	243	0.0183687	9606	Homo sapiens	BCAN;G6PC;ACSL6;ALDOB		R-HSA-1971487;R-HSA-1793176;R-HSA-1971482;R-HSA-1971483;R-HSA-71495;R-HSA-70342;R-HSA-71496;R-HSA-2065233;R-HSA-71825;R-HSA-2022911;R-HSA-1889981;R-HSA-9638064;R-HSA-2018682;R-HSA-1889978;R-HSA-1878002;R-HSA-2022065;R-HSA-9632034;R-HSA-2022063;R-HSA-2022061;R-HSA-9632033;R-HSA-2022056;R-HSA-2022052;R-HSA-5661290;R-HSA-2018659;R-HSA-1971491;R-HSA-1889955	https://reactome.org/PathwayBrowser/#/R-HSA-71387
R-HSA-5621481	C-type lectin receptors (CLRs)	1	203	0.0137898	0.984696	0.984696	1	68	0.00514022	9606	Homo sapiens	MUC3A		R-HSA-8858500	https://reactome.org/PathwayBrowser/#/R-HSA-5621481
R-HSA-5689880	Ub-specific processing proteases	1	206	0.0139936	0.985619	0.985619	1	40	0.00302366	9606	Homo sapiens	VDAC2		R-HSA-5696872	https://reactome.org/PathwayBrowser/#/R-HSA-5689880
R-HSA-983169	Class I MHC mediated antigen processing & presentation	4	465	0.0315875	0.986302	0.986302	5	48	0.00362839	9606	Homo sapiens	SOCS3;RNF144B;TRIM50;CTSS		R-HSA-983147;R-HSA-1236948;R-HSA-983157;R-HSA-983156;R-HSA-983140	https://reactome.org/PathwayBrowser/#/R-HSA-983169
R-HSA-168249	Innate Immune System	17	1331	0.0904151	0.988649	0.988649	33	701	0.0529896	9606	Homo sapiens	SERPINA3;PGLYRP2;GSDMA;SERPINB2;LEAP2;CTSZ;PLA2G2A;PTAFR;HP;ITGAL;C8B;MUC3A;CTSS;OSCAR;PTPRB;LCK;FOLR3		R-HSA-2424484;R-HSA-2424486;R-HSA-8858500;R-HSA-2424487;R-HSA-2424480;R-HSA-2424482;R-HSA-6799981;R-HSA-2395439;R-HSA-6800426;R-HSA-6799977;R-HSA-173709;R-HSA-6799350;R-HSA-1678920;R-HSA-6800434;R-HSA-2396594;R-HSA-173723;R-HSA-173720;R-HSA-2530429;R-HSA-1678981;R-HSA-6813626;R-HSA-173725;R-HSA-8852580;R-HSA-2530445;R-HSA-6798743;R-HSA-2395412;R-HSA-210289;R-HSA-8862771;R-HSA-6798751;R-HSA-679874…	https://reactome.org/PathwayBrowser/#/R-HSA-168249
R-HSA-5357801	Programmed Cell Death	1	218	0.0148088	0.988788	0.988788	6	175	0.0132285	9606	Homo sapiens	DHDH		R-HSA-114307;R-HSA-114275;R-HSA-168849;R-HSA-114264;R-HSA-114284;R-HSA-139917	https://reactome.org/PathwayBrowser/#/R-HSA-5357801
R-HSA-5683057	MAPK family signaling cascades	3	403	0.0273759	0.989359	0.989359	2	122	0.00922216	9606	Homo sapiens	KLB;HSPB8;RASGRP3		R-HSA-5672965;R-HSA-5687121	https://reactome.org/PathwayBrowser/#/R-HSA-5683057
R-HSA-9006934	Signaling by Receptor Tyrosine Kinases	6	629	0.0427281	0.989503	0.989503	51	704	0.0532164	9606	Homo sapiens	KLB;LCK;HSPB8;ID2;DHDH		R-HSA-109699;R-HSA-205319;R-HSA-1433488;R-HSA-1562641;R-HSA-205205;R-HSA-5654734;R-HSA-9603598;R-HSA-1307955;R-HSA-8941613;R-HSA-1307963;R-HSA-5654655;R-HSA-1470012;R-HSA-5218916;R-HSA-5654653;R-HSA-1470010;R-HSA-5654651;R-HSA-1470009;R-HSA-205234;R-HSA-205238;R-HSA-9613476;R-HSA-1433506;R-HSA-1433514;R-HSA-205244;R-HSA-5654422;R-HSA-1433428;R-HSA-5654423;R-HSA-5654418;R-HSA-5654163;R-HSA-5654428…	https://reactome.org/PathwayBrowser/#/R-HSA-9006934
R-HSA-1483257	Phospholipid metabolism	2	325	0.0220773	0.990592	0.990592	15	218	0.0164789	9606	Homo sapiens	SACM1L;PLA2G2A		R-HSA-1482679;R-HSA-1482868;R-HSA-1676124;R-HSA-1602398;R-HSA-1602417;R-HSA-1676114;R-HSA-1482907;R-HSA-1482776;R-HSA-1482887;R-HSA-1602377;R-HSA-1482816;R-HSA-1602446;R-HSA-1602368;R-HSA-1676133;R-HSA-1602374	https://reactome.org/PathwayBrowser/#/R-HSA-1483257
R-HSA-195258	RHO GTPase Effectors	2	328	0.0222811	0.991091	0.991091	2	113	0.00854184	9606	Homo sapiens	TUBB1;TUBA4B		R-HSA-5666169;R-HSA-5672329	https://reactome.org/PathwayBrowser/#/R-HSA-195258
R-HSA-1483206	Glycerophospholipid biosynthesis	1	232	0.0157598	0.991616	0.991616	12	133	0.0100537	9606	Homo sapiens	PLA2G2A		R-HSA-1482887;R-HSA-1482679;R-HSA-1602377;R-HSA-1482868;R-HSA-1602398;R-HSA-1482816;R-HSA-1602446;R-HSA-1602368;R-HSA-1602417;R-HSA-1482907;R-HSA-1602374;R-HSA-1482776	https://reactome.org/PathwayBrowser/#/R-HSA-1483206
R-HSA-8951664	Neddylation	1	241	0.0163712	0.993046	0.993046	5	31	0.00234334	9606	Homo sapiens	SOCS3		R-HSA-8956040;R-HSA-8955289;R-HSA-8955241;R-HSA-8952044;R-HSA-8952039	https://reactome.org/PathwayBrowser/#/R-HSA-8951664
R-HSA-422475	Axon guidance	5	586	0.0398071	0.993135	0.993135	28	298	0.0225263	9606	Homo sapiens	TUBB1;ACP5;VLDLR;EPHA1;TUBA4B		R-HSA-399942;R-HSA-8855237;R-HSA-8854466;R-HSA-8855232;R-HSA-445071;R-HSA-399951;R-HSA-399946;R-HSA-399944;R-HSA-3928628;R-HSA-445077;R-HSA-416725;R-HSA-8855259;R-HSA-3928602;R-HSA-3928607;R-HSA-3928604;R-HSA-3928597;R-HSA-3928660;R-HSA-3928651;R-HSA-4093327;R-HSA-3928584;R-HSA-3928648;R-HSA-3928591;R-HSA-399934;R-HSA-3928642;R-HSA-3928578;R-HSA-399933;R-HSA-399931;R-HSA-3928646	https://reactome.org/PathwayBrowser/#/R-HSA-422475
R-HSA-5673001	RAF/MAP kinase cascade	2	345	0.0234359	0.993469	0.993469	1	75	0.00566936	9606	Homo sapiens	KLB;RASGRP3		R-HSA-5672965	https://reactome.org/PathwayBrowser/#/R-HSA-5673001
R-HSA-199991	Membrane Trafficking	6	666	0.0452415	0.993752	0.993752	48	219	0.0165545	9606	Homo sapiens	FZD4;CTSZ;TUBB1;TUBA4B;FOLR1;SYT8		R-HSA-8868230;R-HSA-8849350;R-HSA-432706;R-HSA-5694418;R-HSA-6811426;R-HSA-432707;R-HSA-203973;R-HSA-5694417;R-HSA-6809006;R-HSA-5694428;R-HSA-8868236;R-HSA-6809003;R-HSA-8849353;R-HSA-432712;R-HSA-6809011;R-HSA-6809010;R-HSA-2316347;R-HSA-8866269;R-HSA-5694410;R-HSA-8871194;R-HSA-8871193;R-HSA-190877;R-HSA-5694409;R-HSA-8868071;R-HSA-8863463;R-HSA-6807877;R-HSA-6807875;R-HSA-5694527;R-HSA-886775…	https://reactome.org/PathwayBrowser/#/R-HSA-199991
R-HSA-5684996	MAPK1/MAPK3 signaling	2	352	0.0239114	0.994257	0.994257	1	82	0.0061985	9606	Homo sapiens	KLB;RASGRP3		R-HSA-5672965	https://reactome.org/PathwayBrowser/#/R-HSA-5684996
R-HSA-5663202	Diseases of signal transduction by growth factor receptors and second messengers	4	529	0.0359351	0.994935	0.994935	10	448	0.033865	9606	Homo sapiens	KLB;LCK;FZD4;DKK1		R-HSA-9670418;R-HSA-9670417;R-HSA-9670416;R-HSA-9670426;R-HSA-5340587;R-HSA-2400009;R-HSA-9670414;R-HSA-9670413;R-HSA-5339711;R-HSA-9670412	https://reactome.org/PathwayBrowser/#/R-HSA-5663202
R-HSA-15869	Metabolism of nucleotides	1	257	0.0174581	0.995015	0.995015	2	136	0.0102804	9606	Homo sapiens	UPB1		R-HSA-73620;R-HSA-73591	https://reactome.org/PathwayBrowser/#/R-HSA-15869
R-HSA-5653656	Vesicle-mediated transport	8	825	0.0560424	0.995071	0.995071	53	252	0.0190491	9606	Homo sapiens	FZD4;CTSZ;TUBB1;STAB1;HP;TUBA4B;FOLR1;SYT8		R-HSA-8868230;R-HSA-5694418;R-HSA-5694417;R-HSA-5694428;R-HSA-8868236;R-HSA-2168883;R-HSA-2168885;R-HSA-2316347;R-HSA-5694410;R-HSA-8871194;R-HSA-8871193;R-HSA-190877;R-HSA-5694409;R-HSA-6807877;R-HSA-6807875;R-HSA-8867756;R-HSA-2197770;R-HSA-8868651;R-HSA-8867754;R-HSA-8868648;R-HSA-5694439;R-HSA-8868661;R-HSA-8868660;R-HSA-8868659;R-HSA-8868658;R-HSA-432688;R-HSA-2230938;R-HSA-5694446;R-HSA-886…	https://reactome.org/PathwayBrowser/#/R-HSA-5653656
R-HSA-157118	Signaling by NOTCH	1	258	0.017526	0.995117	0.995117	2	154	0.0116411	9606	Homo sapiens	CCND1		R-HSA-4395227;R-HSA-1912416	https://reactome.org/PathwayBrowser/#/R-HSA-157118
R-HSA-4839726	Chromatin organization	1	260	0.0176618	0.995317	0.995317	6	85	0.00642528	9606	Homo sapiens	CCND1		R-HSA-3215426;R-HSA-5216234;R-HSA-5205799;R-HSA-3215385;R-HSA-5205861;R-HSA-5661117	https://reactome.org/PathwayBrowser/#/R-HSA-4839726
R-HSA-3247509	Chromatin modifying enzymes	1	260	0.0176618	0.995317	0.995317	6	85	0.00642528	9606	Homo sapiens	CCND1		R-HSA-3215426;R-HSA-5216234;R-HSA-5205799;R-HSA-3215385;R-HSA-5205861;R-HSA-5661117	https://reactome.org/PathwayBrowser/#/R-HSA-3247509
R-HSA-73894	DNA Repair	2	369	0.0250662	0.995803	0.995803	15	332	0.0250964	9606	Homo sapiens	EBI3;CYP17A1		R-HSA-5684887;R-HSA-6785732;R-HSA-5684882;R-HSA-5686642;R-HSA-6785986;R-HSA-5685011;R-HSA-5693564;R-HSA-6786155;R-HSA-5693561;R-HSA-6786166;R-HSA-5685156;R-HSA-6785361;R-HSA-5686657;R-HSA-5693580;R-HSA-6786171	https://reactome.org/PathwayBrowser/#/R-HSA-73894
R-HSA-9675108	Nervous system development	5	622	0.0422526	0.996004	0.996004	28	324	0.0244916	9606	Homo sapiens	TUBB1;ACP5;VLDLR;EPHA1;TUBA4B		R-HSA-399942;R-HSA-8855237;R-HSA-8854466;R-HSA-8855232;R-HSA-445071;R-HSA-399951;R-HSA-399946;R-HSA-399944;R-HSA-3928628;R-HSA-445077;R-HSA-416725;R-HSA-8855259;R-HSA-3928602;R-HSA-3928607;R-HSA-3928604;R-HSA-3928597;R-HSA-3928660;R-HSA-3928651;R-HSA-4093327;R-HSA-3928584;R-HSA-3928648;R-HSA-3928591;R-HSA-399934;R-HSA-3928642;R-HSA-3928578;R-HSA-399933;R-HSA-399931;R-HSA-3928646	https://reactome.org/PathwayBrowser/#/R-HSA-9675108
R-HSA-194315	Signaling by Rho GTPases	3	470	0.0319272	0.996559	0.996559	3	125	0.00944894	9606	Homo sapiens	FGD3;TUBB1;TUBA4B		R-HSA-194913;R-HSA-5666169;R-HSA-5672329	https://reactome.org/PathwayBrowser/#/R-HSA-194315
R-HSA-69620	Cell Cycle Checkpoints	1	280	0.0190204	0.996912	0.996912	1	56	0.00423312	9606	Homo sapiens	CYP17A1		R-HSA-6799332	https://reactome.org/PathwayBrowser/#/R-HSA-69620
R-HSA-1266738	Developmental Biology	14	1263	0.0857958	0.996919	0.996919	57	556	0.0420289	9606	Homo sapiens	TUBB1;ACP5;KRT7;VLDLR;ANGPTL4;PRSS8;EPHA1;PPARGC1A;DKK1;TUBA4B;KRT6A		R-HSA-6806629;R-HSA-8849797;R-HSA-1183003;R-HSA-445071;R-HSA-2972967;R-HSA-560517;R-HSA-3928628;R-HSA-6810357;R-HSA-445077;R-HSA-8942224;R-HSA-2972977;R-HSA-3928602;R-HSA-6805573;R-HSA-3928607;R-HSA-3928604;R-HSA-3928597;R-HSA-4093327;R-HSA-6806613;R-HSA-3928584;R-HSA-3928591;R-HSA-6806610;R-HSA-399934;R-HSA-3928578;R-HSA-399933;R-HSA-6814298;R-HSA-399931;R-HSA-1183058;R-HSA-399942;R-HSA-8855237;…	https://reactome.org/PathwayBrowser/#/R-HSA-1266738
R-HSA-5688426	Deubiquitination	1	288	0.0195639	0.997387	0.997387	1	77	0.00582055	9606	Homo sapiens	VDAC2		R-HSA-5696872	https://reactome.org/PathwayBrowser/#/R-HSA-5688426
R-HSA-9658195	Leishmania infection	2	403	0.0273759	0.997772	0.997772	3	95	0.00718119	9606	Homo sapiens	ACE2;IL18		R-HSA-449058;R-HSA-448703;R-HSA-9660824	https://reactome.org/PathwayBrowser/#/R-HSA-9658195
R-HSA-9664433	Leishmania parasite growth and survival	1	297	0.0201753	0.997834	0.997834	1	40	0.00302366	9606	Homo sapiens	ACE2		R-HSA-9660824	https://reactome.org/PathwayBrowser/#/R-HSA-9664433
R-HSA-9662851	Anti-inflammatory response favouring Leishmania parasite infection	1	297	0.0201753	0.997834	0.997834	1	40	0.00302366	9606	Homo sapiens	ACE2		R-HSA-9660824	https://reactome.org/PathwayBrowser/#/R-HSA-9662851
R-HSA-68886	M Phase	2	416	0.0282589	0.998255	0.998255	11	91	0.00687883	9606	Homo sapiens	TUBB1;TUBA4B		R-HSA-9668419;R-HSA-9648114;R-HSA-9648017;R-HSA-2484822;R-HSA-375302;R-HSA-2467809;R-HSA-2467811;R-HSA-380316;R-HSA-1638803;R-HSA-2468287;R-HSA-1638821	https://reactome.org/PathwayBrowser/#/R-HSA-68886
R-HSA-372790	Signaling by GPCR	16	1497	0.101691	0.999114	0.999114	30	445	0.0336382	9606	Homo sapiens	EDN2;PTGDR2;FZD4;AKR1C1;PTAFR;HTR1D;SLC5A11;APOC3;KNG1;FGD3;WNT6;HCAR3;ACE2;AKR1B10;CCL26		R-HSA-749448;R-HSA-749454;R-HSA-3296309;R-HSA-2404131;R-HSA-749452;R-HSA-2404140;R-HSA-2423785;R-HSA-419351;R-HSA-443986;R-HSA-390929;R-HSA-388560;R-HSA-419166;R-HSA-2424254;R-HSA-749456;R-HSA-2395768;R-HSA-9611277;R-HSA-379044;R-HSA-417829;R-HSA-380073;R-HSA-2395784;R-HSA-379048;R-HSA-2429643;R-HSA-201708;R-HSA-420265;R-HSA-420214;R-HSA-391934;R-HSA-744887;R-HSA-744886;R-HSA-374331;R-HSA-2855252	https://reactome.org/PathwayBrowser/#/R-HSA-372790
R-HSA-3700989	Transcriptional Regulation by TP53	2	486	0.0330141	0.999539	0.999539	3	259	0.0195782	9606	Homo sapiens	DHDH;CYP17A1		R-HSA-3700984;R-HSA-6799332;R-HSA-6803892	https://reactome.org/PathwayBrowser/#/R-HSA-3700989
R-HSA-388396	GPCR downstream signalling	13	1355	0.0920454	0.999576	0.999576	18	260	0.0196538	9606	Homo sapiens	FGD3;ACE2;HCAR3;AKR1B10;EDN2;PTGDR2;AKR1C1;PTAFR;HTR1D;SLC5A11;APOC3;KNG1		R-HSA-379044;R-HSA-749448;R-HSA-749454;R-HSA-2404131;R-HSA-749452;R-HSA-2404140;R-HSA-380073;R-HSA-2395784;R-HSA-2423785;R-HSA-379048;R-HSA-2429643;R-HSA-419166;R-HSA-2424254;R-HSA-749456;R-HSA-2395768;R-HSA-744887;R-HSA-744886;R-HSA-2855252	https://reactome.org/PathwayBrowser/#/R-HSA-388396
R-HSA-69278	Cell Cycle, Mitotic	3	596	0.0404864	0.999628	0.999628	30	350	0.026457	9606	Homo sapiens	CCND1;TUBB1;TUBA4B		R-HSA-9648017;R-HSA-375302;R-HSA-2467809;R-HSA-2467811;R-HSA-8942607;R-HSA-1638803;R-HSA-8852298;R-HSA-8941895;R-HSA-9668419;R-HSA-8941915;R-HSA-8852306;R-HSA-380316;R-HSA-8848414;R-HSA-2468287;R-HSA-8942803;R-HSA-9648114;R-HSA-9018017;R-HSA-69227;R-HSA-75820;R-HSA-75823;R-HSA-75822;R-HSA-75825;R-HSA-75824;R-HSA-2484822;R-HSA-8848436;R-HSA-1638821;R-HSA-1226094;R-HSA-8942836;R-HSA-1226095;R-HSA-8…	https://reactome.org/PathwayBrowser/#/R-HSA-69278
R-HSA-1640170	Cell Cycle	4	734	0.0498607	0.999837	0.999837	31	449	0.0339406	9606	Homo sapiens	CCND1;TUBB1;TUBA4B;CYP17A1		R-HSA-9648017;R-HSA-6799332;R-HSA-375302;R-HSA-2467809;R-HSA-2467811;R-HSA-8942607;R-HSA-1638803;R-HSA-8852298;R-HSA-8941895;R-HSA-9668419;R-HSA-8941915;R-HSA-8852306;R-HSA-380316;R-HSA-8848414;R-HSA-2468287;R-HSA-8942803;R-HSA-9648114;R-HSA-9018017;R-HSA-69227;R-HSA-75820;R-HSA-75823;R-HSA-75822;R-HSA-75825;R-HSA-75824;R-HSA-2484822;R-HSA-8848436;R-HSA-1638821;R-HSA-1226094;R-HSA-8942836;R-HSA-1…	https://reactome.org/PathwayBrowser/#/R-HSA-1640170
R-HSA-597592	Post-translational protein modification	15	1597	0.108484	0.999896	0.999896	56	526	0.0397611	9606	Homo sapiens	IGFBP1;CTSZ;PROZ;LYPD3;PDZK1;TUBA4B;MUC3A;KNG1;SOCS3;RAB25;TUBB1;VDAC2;FOLR3;FOLR1;PPARGC1A		R-HSA-8956040;R-HSA-5694418;R-HSA-913675;R-HSA-5694417;R-HSA-5694428;R-HSA-8955289;R-HSA-3903017;R-HSA-5694410;R-HSA-5694409;R-HSA-977071;R-HSA-6807877;R-HSA-6807875;R-HSA-8867370;R-HSA-5694439;R-HSA-8955706;R-HSA-981814;R-HSA-5694446;R-HSA-6786012;R-HSA-8866105;R-HSA-5696872;R-HSA-981809;R-HSA-5694441;R-HSA-5694487;R-HSA-977228;R-HSA-8870469;R-HSA-1964505;R-HSA-8870466;R-HSA-203973;R-HSA-1964501…	https://reactome.org/PathwayBrowser/#/R-HSA-597592
R-HSA-212436	Generic Transcription Pathway	14	1554	0.105563	0.999927	0.999927	28	824	0.0622874	9606	Homo sapiens	IGFBP1;ZNF320;SOCS3;G6PC;CCND1;DHDH;ITGAL;PPARGC1A;CYP17A1		R-HSA-3700984;R-HSA-6799332;R-HSA-8853956;R-HSA-9623192;R-HSA-8853965;R-HSA-8952069;R-HSA-975040;R-HSA-9008839;R-HSA-8939929;R-HSA-9623427;R-HSA-9623168;R-HSA-6803892;R-HSA-9008412;R-HSA-8949343;R-HSA-9623240;R-HSA-8951442;R-HSA-8951443;R-HSA-8949335;R-HSA-9623280;R-HSA-9623281;R-HSA-8955885;R-HSA-9623415;R-HSA-8955748;R-HSA-8865320;R-HSA-8952058;R-HSA-8939900;R-HSA-8952062;R-HSA-8938867	https://reactome.org/PathwayBrowser/#/R-HSA-212436
R-HSA-2262752	Cellular responses to stress	3	700	0.0475511	0.999945	0.999945	2	230	0.017386	9606	Homo sapiens	HSPB8;TUBB1;TUBA4B		R-HSA-5618080;R-HSA-5082356	https://reactome.org/PathwayBrowser/#/R-HSA-2262752
R-HSA-8953897	Cellular responses to external stimuli	3	718	0.0487739	0.999961	0.999961	2	261	0.0197294	9606	Homo sapiens	HSPB8;TUBB1;TUBA4B		R-HSA-5618080;R-HSA-5082356	https://reactome.org/PathwayBrowser/#/R-HSA-8953897
R-HSA-73857	RNA Polymerase II Transcription	14	1693	0.115006	0.99999	0.99999	28	885	0.0668985	9606	Homo sapiens	IGFBP1;ZNF320;SOCS3;G6PC;CCND1;DHDH;ITGAL;PPARGC1A;CYP17A1		R-HSA-3700984;R-HSA-6799332;R-HSA-8853956;R-HSA-9623192;R-HSA-8853965;R-HSA-8952069;R-HSA-975040;R-HSA-9008839;R-HSA-8939929;R-HSA-9623427;R-HSA-9623168;R-HSA-6803892;R-HSA-9008412;R-HSA-8949343;R-HSA-9623240;R-HSA-8951442;R-HSA-8951443;R-HSA-8949335;R-HSA-9623280;R-HSA-9623281;R-HSA-8955885;R-HSA-9623415;R-HSA-8955748;R-HSA-8865320;R-HSA-8952058;R-HSA-8939900;R-HSA-8952062;R-HSA-8938867	https://reactome.org/PathwayBrowser/#/R-HSA-73857
R-HSA-418555	G alpha (s) signalling events	1	602	0.040894	0.999997	0.999997	3	19	0.00143624	9606	Homo sapiens	ACE2		R-HSA-379044;R-HSA-744887;R-HSA-744886	https://reactome.org/PathwayBrowser/#/R-HSA-418555
R-HSA-74160	Gene expression (Transcription)	15	1851	0.125739	0.999997	0.999997	35	996	0.0752891	9606	Homo sapiens	IGFBP1;PIWIL2;ZNF320;SOCS3;G6PC;CCND1;DHDH;ITGAL;PPARGC1A;CYP17A1		R-HSA-3700984;R-HSA-6799332;R-HSA-8853956;R-HSA-9623192;R-HSA-8853965;R-HSA-8952069;R-HSA-5601883;R-HSA-975040;R-HSA-9008839;R-HSA-8939929;R-HSA-9623427;R-HSA-9623168;R-HSA-6803892;R-HSA-9008412;R-HSA-5601922;R-HSA-8949343;R-HSA-9623240;R-HSA-8951442;R-HSA-8951443;R-HSA-5601929;R-HSA-8949335;R-HSA-9623280;R-HSA-9623281;R-HSA-5601910;R-HSA-5603062;R-HSA-8955885;R-HSA-9623415;R-HSA-8955748;R-HSA-56…	https://reactome.org/PathwayBrowser/#/R-HSA-74160
R-HSA-1430728	Metabolism	43	3658	0.248489	0.999997	0.999997	120	2247	0.169854	9606	Homo sapiens	MSMO1;CYP19A1;CYP17A1;CYP3A7;CYP2B6;CYP2D6;HSD17B2;ACP5;HAO1;GBP2;PPARGC1A;AOC3;G6PC;SACM1L;BHMT2;AKR1C1;PLA2G2A;SLC52A3;DIO1;ACSL6;SLC6A12;APOC3;AKR1C2;PTGR1;BAAT;UPB1;SULT2B1;FA2H;BCAN;HAL;DAO;AKR1B10;DDAH1;AKR1B15;ALDOB;ANGPTL4;CYP2E1;UGT2B7;PTGES		R-HSA-1971487;R-HSA-211968;R-HSA-1971482;R-HSA-1971483;R-HSA-2404131;R-HSA-2404140;R-HSA-193800;R-HSA-211983;R-HSA-1482776;R-HSA-5696838;R-HSA-211991;R-HSA-211988;R-HSA-5693761;R-HSA-3165230;R-HSA-9638064;R-HSA-212005;R-HSA-192036;R-HSA-193060;R-HSA-193070;R-HSA-193068;R-HSA-193072;R-HSA-193841;R-HSA-192312;R-HSA-5661290;R-HSA-1971491;R-HSA-8862137;R-HSA-76354;R-HSA-1676124;R-HSA-71495;R-HSA-1602…	https://reactome.org/PathwayBrowser/#/R-HSA-1430728
R-HSA-8953854	Metabolism of RNA	2	782	0.0531214	0.999999	0.999999	6	187	0.0141356	9606	Homo sapiens	HSPB8;PAIP1		R-HSA-450551;R-HSA-450580;R-HSA-430021;R-HSA-429955;R-HSA-8941312;R-HSA-429992	https://reactome.org/PathwayBrowser/#/R-HSA-8953854
R-HSA-5663205	Infectious disease	9	1468	0.0997215	0.999999	0.999999	24	751	0.0567692	9606	Homo sapiens	ACE2;CD8B;LCK;FXYD3;TUBB1;IL18;TMPRSS2;TUBA4B		R-HSA-9694579;R-HSA-9678128;R-HSA-449058;R-HSA-9686711;R-HSA-9695415;R-HSA-9686710;R-HSA-182186;R-HSA-9660824;R-HSA-167566;R-HSA-9699007;R-HSA-9614367;R-HSA-9683488;R-HSA-182198;R-HSA-9614343;R-HSA-9694661;R-HSA-9684068;R-HSA-9686731;R-HSA-448703;R-HSA-200954;R-HSA-9681514;R-HSA-182171;R-HSA-9697423;R-HSA-9694287;R-HSA-9698988	https://reactome.org/PathwayBrowser/#/R-HSA-5663205
R-HSA-1643685	Disease	22	2538	0.172407	1	1	56	1589	0.120115	9606	Homo sapiens	KLB;G6PC;FZD4;SLC40A1;IL18;TMPRSS2;TUBA4B;CYP19A1;MUC3A;DKK1;CYP17A1;ACE2;BCAN;SLC7A7;CCND1;CD8B;LCK;FXYD3;SIT1;TUBB1;ALDOB		R-HSA-3636919;R-HSA-9670418;R-HSA-9670417;R-HSA-9670416;R-HSA-5655760;R-HSA-9670426;R-HSA-9660824;R-HSA-167566;R-HSA-9614367;R-HSA-3595175;R-HSA-6785524;R-HSA-5096537;R-HSA-9614343;R-HSA-9659782;R-HSA-5096532;R-HSA-182171;R-HSA-9697423;R-HSA-3595178;R-HSA-3274540;R-HSA-9670414;R-HSA-9670413;R-HSA-3595176;R-HSA-9670412;R-HSA-5656438;R-HSA-9678128;R-HSA-449058;R-HSA-9686711;R-HSA-9695415;R-HSA-9686…	https://reactome.org/PathwayBrowser/#/R-HSA-1643685
R-HSA-392499	Metabolism of proteins	19	2363	0.160519	1	1	82	892	0.0674276	9606	Homo sapiens	IGFBP1;CTSZ;PROZ;LYPD3;PDZK1;TUBA4B;MUC3A;KNG1;DPP4;SOCS3;ACE2;RAB25;CREB3L3;TUBB1;VDAC2;FOLR3;FOLR1;PPARGC1A		R-HSA-8956040;R-HSA-9023627;R-HSA-9023626;R-HSA-5694418;R-HSA-913675;R-HSA-5694417;R-HSA-5694428;R-HSA-8955289;R-HSA-3903017;R-HSA-9023633;R-HSA-9023632;R-HSA-5694410;R-HSA-5694409;R-HSA-977071;R-HSA-6807877;R-HSA-6807875;R-HSA-381487;R-HSA-8867370;R-HSA-5694439;R-HSA-8955706;R-HSA-981814;R-HSA-5694446;R-HSA-6786012;R-HSA-8866105;R-HSA-5696872;R-HSA-981809;R-HSA-5694441;R-HSA-5694487;R-HSA-389956…	https://reactome.org/PathwayBrowser/#/R-HSA-392499
R-HSA-162582	Signal Transduction	34	3423	0.232525	1	1	137	2408	0.182024	9606	Homo sapiens	KLB;PTGDR2;HSPB8;PTAFR;SLC5A11;IL1RAP;KNG1;RASGRP3;FGD3;WNT6;SOCS3;HCAR3;CCND1;TUBB1;PRKG1;EDN2;MMP7;FZD4;AKR1C1;HTR1D;DHDH;APOC3;TUBA4B;DKK1;ACE2;AKR1B10;LCK;ID2;ALDH8A1;CCL26		R-HSA-3769401;R-HSA-205319;R-HSA-1562641;R-HSA-3296309;R-HSA-2404131;R-HSA-5687121;R-HSA-2404140;R-HSA-3781941;R-HSA-3781943;R-HSA-419351;R-HSA-3238691;R-HSA-390929;R-HSA-3238694;R-HSA-9021072;R-HSA-1307955;R-HSA-9009065;R-HSA-5099886;R-HSA-417829;R-HSA-1307963;R-HSA-5654655;R-HSA-1470012;R-HSA-5218916;R-HSA-5654653;R-HSA-1470010;R-HSA-5654651;R-HSA-5666169;R-HSA-1470009;R-HSA-5696101;R-HSA-50998…	https://reactome.org/PathwayBrowser/#/R-HSA-162582
