# Supplementary material for: PAIP1 regulates expression of immune and inflammatory response associated genes at transcript level in liver cancer cell
Source: PeerJ. 2023 Apr 21;11:e15070. doi: 10.7717/peerj.15070 (PMC10124545; doi:10.7717/peerj.15070)
Supplement: Supplemental Information 11 [file peerj-11-15070-s011.xlsx]

## Sheet: HepG2-PAIP1
Sample Name	Ct	Ct ref	Ct mean	△ct(-)		2-△ct	2-△△ct	Sd	RQ1
NC1	21.4123	14.2793	14.5027	-6.90953	2	0.00831809	0.774436	0.219841	1.01332	0.0108839
	20.9616	14.7911		-6.45886		0.0113682	1.0584
	20.7719	14.4378		-6.26917		0.0129656	1.20713
NC2	20.9469		14.2894	-6.65745		0.0099062	0.922293	0.0618489	0.978043	0.010505
	20.8782	14.3027		-6.58877		0.0103892	0.967263
	20.7673	14.2761		-6.47784		0.0112196	1.04457
NC3	20.8698	14.149	14.1798	-6.69002		0.00968505	0.901703	0.0940135	1	0.0107408
	20.7072	14.4326		-6.52747		0.0108402	1.00925
	20.5974	13.9576		-6.41768		0.0116973	1.08905
NC4	20.553	14.7219	14.5272	-6.02585		0.0153475	1.42889	0.300855	1.19169	0.0127998
	21.2968	14.5889		-6.76965		0.00916498	0.853284
	20.6973	14.2708		-6.17014		0.0138868	1.2929
PAIP1 1-1	22.8477	15.561	15.5037	-7.34404		0.00615493	0.57304	0.125469	0.666066	0.0071541
	22.7425	15.4543		-7.23883		0.00662055	0.61639
	22.3507	15.4958		-6.84695		0.00868684	0.808767
PAIP1 1-2	22.2322	14.4519	14.4457	-7.78656		0.00452911	0.421672	0.0837609	0.518311	0.00556709
	21.8146	14.3525		-7.36895		0.00604958	0.563232
	21.7973	14.5325		-7.35164		0.00612259	0.570029
PAIP1 1-3	22.3604	14.8425	14.7909	-7.5695		0.00526444	0.490133	0.0851873	0.5723	0.00614698
	22.1514	14.7569		-7.36047		0.00608523	0.566551
	21.9307	14.7733		-7.13974		0.00709128	0.660216
PAIP1 1-4	22.0296	14.7474	14.678	-7.35157		0.00612291	0.570059	0.0437564	0.592239	0.00636115
	21.8567	14.7014		-7.17866		0.00690254	0.642644
	22.045	14.5854		-7.36694		0.00605799	0.564015
PAIP1 2-1	23.2718	14.9323	14.9397	-8.33211		0.00310303	0.2889	0.0250175	0.312644	0.00335806
	23.1689	14.9174		-8.22917		0.00333251	0.310265
	23.0421	14.9695		-8.10239		0.00363862	0.338765
PAIP1 2-2	22.9657	14.6168	14.6137	-8.35202		0.00306048	0.284939	0.0400363	0.306369	0.00329066
	22.9827	14.5743		-8.36898		0.00302472	0.28161
	22.6585	14.6501		-8.04481		0.00378678	0.352559
PAIP1 2-3	23.1348	14.7221	14.7467	-8.3881		0.00298491	0.277903	0.0290326	0.29717	0.00319185
	22.8844	14.7712		-8.13776		0.00355051	0.330562
	23.1083			-8.36165		0.00304014	0.283045
PAIP1 2-4	24.1003	15.0149	15.1822	-8.91813		0.00206716	0.192458	0.156426	0.326574	0.00350768
	23.5145	15.3583		-8.33234		0.00310252	0.288853
	22.7275	15.1735		-7.54534		0.00535337	0.498412
PAIP1 3-1	22.6221	14.4526	14.2765	-8.34562		0.0030741	0.286207	0.0340769	0.286672	0.0030791
	22.801	14.0689		-8.52451		0.00271561	0.25283
	22.4567	14.3079		-8.1802		0.00344759	0.320979
PAIP1 3-2	22.8381	14.1412	14.1206	-8.71743		0.00237571	0.221185	0.0205879	0.207971	0.00223378
	23.1016			-8.98102		0.00197899	0.18425
	22.8558	14.1		-8.73518		0.00234665	0.218479
PAIP1 3-3	23.6627	15.8029	15.6906	-7.97215		0.00398238	0.37077	0.0100381	0.37838	0.00406412
	23.5907	15.6314		-7.9001		0.00418632	0.389757
	23.6479	15.6375		-7.95727		0.00402367	0.374614
PAIP1 3-4	22.6049	14.464	14.3635	-8.24139		0.00330442	0.30765	0.016543	0.288868	0.00310269
	22.728	14.3053		-8.36447		0.0030342	0.282492
	22.7591	14.3213		-8.3956		0.00296943	0.276462

## Sheet: HepG2-1-COL9A2
Sample Name	Ct	Ct ref	Ct mean	△ct(-)		2-△ct	2-△△ct	Sd	RQ1
NC-1	25.796	20.296	20.312	-5.484	2	0.0223435	0.959007	0.15138	1	0.0232986
	25.931	20.253		-5.619		0.0203476	0.873339
	25.512	20.387		-5.2		0.0272047	1.16765
NC-2	25.166	20.445	20.426	-4.74		0.0374212	1.60616	0.165841	1.46306	0.0340872
	25.263	20.444		-4.837		0.0349879	1.50172
	25.492	20.389		-5.066		0.0298526	1.2813
NC-3	25.424	20.212	20.1183	-5.30567		0.0252834	1.08519	0.0607796	1.15533	0.0269176
	25.293	20.076		-5.17467		0.0276866	1.18834
	25.288	20.067		-5.16967		0.0277827	1.19246
SI PAIP1-1	24.354	20.066	20.0267	-4.32733		0.049813	2.13803	0.0522257	2.11244	0.0492169
	24.413	20.052		-4.38633		0.047817	2.05235
	24.348	19.962		-4.32133		0.0500206	2.14694
SI PAIP1-2	24.241	19.982	20.0007	-4.24033		0.0529094	2.27093	0.161101	2.37858	0.0554177
	24.222	20.031		-4.22133		0.0536108	2.30103
	24.066	19.989		-4.06533		0.0597328	2.56379
SI PAIP1-3	24.356	20.999	20.979	-3.377		0.0962546	4.13135	0.304599	3.77982	0.0880644
	24.549	20.971		-3.57		0.0842021	3.61404
	24.557	20.967		-3.578		0.0837365	3.59406

## Sheet: HepG2-2-HAMP
Sample Name	Ct	Ct ref	Ct mean	△ct(-)		2-△ct	2-△△ct	Sd	RQ1
NC-1	22.614	20.296	20.312	-2.302	2	0.202782	0.919689	0.0891825	1	0.220489
	22.361	20.253		-2.049		0.241651	1.09598
	22.516	20.387		-2.204		0.217035	0.984333
NC-2	22.572	20.445	20.426	-2.146		0.225938	1.02471	0.171857	1.14283	0.251982
	22.185	20.444		-1.759		0.295453	1.33999
	22.518	20.389		-2.092		0.234555	1.06379
NC-3	22.302	20.212	20.1183	-2.18367		0.220116	0.998305	0.0387493	0.98644	0.217499
	22.274	20.076		-2.15567		0.224429	1.01787
	22.384	20.067		-2.26567		0.207953	0.943145
SI PAIP1-1	23.804	20.066	20.0267	-3.77733		0.0729305	0.330766	0.00371233	0.334392	0.0737298
	23.789	20.052		-3.76233		0.0736928	0.334224
	23.772	19.962		-3.74533		0.0745663	0.338185
SI PAIP1-2	24.088	19.982	20.0007	-4.08733		0.0588288	0.26681	0.00923026	0.256169	0.0564826
	24.18	20.031		-4.17933		0.0551944	0.250327
	24.174	19.989		-4.17333		0.0554245	0.25137
SI PAIP1-3	23.966	20.999	20.979	-2.987		0.126131	0.572053	0.103895	0.452924	0.0998649
	24.462	20.971		-3.483		0.089436	0.405625
	24.552	20.967		-3.573		0.0840272	0.381094

## Sheet: HepG2-3-DKK1
Sample Name	Ct	Ct ref	Ct mean	△ct(-)		2-△ct	2-△△ct	Sd	RQ1
NC-1	20.508	20.296	20.312	-0.196	2	0.872968	1.04382	0.0655984	1	0.836318
	20.683	20.253		-0.371001		0.773246	0.924583
	20.525	20.387		-0.213		0.862741	1.03159
NC-2	20.775	20.445	20.426	-0.349		0.785128	0.938791	0.0407257	0.924336	0.773039
	20.871	20.444		-0.445		0.734584	0.878355
	20.749	20.389		-0.323001		0.799406	0.955863
NC-3	20.353	20.212	20.1183	-0.234667		0.849881	1.01622	0.0460548	0.971056	0.812112
	20.49	20.076		-0.371667		0.772889	0.924157
	20.416	20.067		-0.297667		0.813567	0.972796
SI PAIP1-1	21.369	20.066	20.0267	-1.34233		0.394382	0.47157	0.0387186	0.515602	0.431208
	21.198	20.052		-1.17133		0.444011	0.530911
	21.162	19.962		-1.13533		0.45523	0.544326
SI PAIP1-2	21.243	19.982	20.0007	-1.24233		0.422689	0.505416	0.00316195	0.505656	0.422889
	21.233	20.031		-1.23233		0.425629	0.508931
	21.251	19.989		-1.25033		0.420351	0.502621
SI PAIP1-3	21.968	20.999	20.979	-0.989		0.503827	0.602434	0.0160257	0.620799	0.519186
	21.899	20.971		-0.92		0.528509	0.631947
	21.908	20.967		-0.929001		0.525222	0.628017

## Sheet: HepG2-4-CCND1
Sample Name	Ct	Ct ref	Ct mean	△ct(-)		2-△ct	2-△△ct	Sd	RQ1
NC-1	22.36	20.296	20.312	-2.048	2	0.241819	0.959069	0.0358416	1	0.252139
	22.278	20.253		-1.966		0.255962	1.01516
	22.263	20.387		-1.951		0.258637	1.02577
NC-2	22.241	20.445	20.426	-1.815		0.284204	1.12717	0.00634586	1.13084	0.285128
	22.241	20.444		-1.815		0.284204	1.12717
	22.227	20.389		-1.801		0.286976	1.13816
NC-3	21.956	20.212	20.1183	-1.83767		0.279774	1.1096	0.047389	1.06732	0.269114
	22	20.076		-1.88167		0.27137	1.07627
	22.083	20.067		-1.96467		0.256198	1.0161
SI PAIP1-1	23.848	20.066	20.0267	-3.82133		0.0707399	0.280559	0.0108454	0.291933	0.0736077
	23.741	20.052		-3.71433		0.0761859	0.302158
	23.785	19.962		-3.75833		0.0738974	0.293082
SI PAIP1-2	23.631	19.982	20.0007	-3.63033		0.0807534	0.320273	0.00832076	0.311301	0.0784912
	23.707	20.031		-3.70633		0.0766095	0.303838
	23.679	19.989		-3.67833		0.0781108	0.309793
SI PAIP1-3	24.306	20.999	20.979	-3.327		0.0996491	0.395215	0.00790283	0.386152	0.0973641
	24.353	20.971		-3.374		0.096455	0.382547
	24.36	20.967		-3.381		0.0959881	0.380695

## Sheet: HepG2-5-APOC3
Sample Name	Ct	Ct ref	Ct mean	△ct(-)		2-△ct	2-△△ct	Sd	RQ1
NC-1	24.063	20.296	20.312	-3.751	2	0.0742739	1.0253	0.0246468	1	0.0724414
	24.134	20.253		-3.822		0.0707071	0.976059
	24.101	20.387		-3.789		0.0723431	0.998644
NC-2	24.3	20.445	20.426	-3.874		0.068204	0.941506	0.0163607	0.952539	0.0690033
	24.255	20.444		-3.829		0.070365	0.971336
	24.295	20.389		-3.869		0.0684408	0.944774
NC-3	24.046	20.212	20.1183	-3.92767		0.0657135	0.907126	0.0350449	0.944993	0.0684566
	23.977	20.076		-3.85867		0.0689328	0.951566
	23.94	20.067		-3.82167		0.0707235	0.976285
SI PAIP1-1	24.796	20.066	20.0267	-4.76933		0.036668	0.506175	0.0306622	0.497317	0.0360263
	24.924	20.052		-4.89733		0.0335549	0.463201
	24.75	19.962		-4.72333		0.037856	0.522574
SI PAIP1-2	24.829	19.982	20.0007	-4.82833		0.0351987	0.485892	0.0275929	0.45453	0.0329268
	24.992	20.031		-4.99133		0.0314383	0.433982
	24.96	19.989		-4.95933		0.0321434	0.443716
SI PAIP1-3	25.251	20.999	20.979	-4.272		0.0517607	0.714518	0.0279937	0.734957	0.0532413
	25.149	20.971		-4.17		0.0555527	0.766864
	25.233	20.967		-4.254		0.0524105	0.723489

## Sheet: HepG2-6-IL1R2
Sample Name	Ct	Ct ref	Ct mean	△ct(-)		2-△ct	2-△△ct	Sd	RQ1
NC-1	27.211	20.296	20.312	-6.899	2	0.00837903	1.07131	0.146192	1	0.00782131
	27.177	20.253		-6.865		0.00857885	1.09686
	27.576	20.387		-7.264		0.00650606	0.831837
NC-2	27.526	20.445	20.426	-7.1		0.00728932	0.931982	0.186816	0.780441	0.00610407
	28.231	20.444		-7.805		0.00447158	0.571717
	27.68	20.389		-7.254		0.00655131	0.837623
NC-3	27.477	20.212	20.1183	-7.35867		0.00609285	0.779007	0.154704	0.929009	0.00726607
	27.237	20.076		-7.11867		0.00719561	0.920001
	26.995	20.067		-6.87667		0.00850975	1.08802
SI PAIP1-1	28.025	20.066	20.0267	-7.99833		0.00391077	0.500014	0.0396089	0.455734	0.00356444
	28.264	20.052		-8.23733		0.00331372	0.423678
	28.198	19.962		-8.17133		0.00346883	0.443511
SI PAIP1-2	27.949	19.982	20.0007	-7.94833		0.00404868	0.517647	0.100294	0.424117	0.00331715
	28.651	20.031		-8.65033		0.0024888	0.318208
	28.195	19.989		-8.19433		0.00341397	0.436496
SI PAIP1-3	29.08	20.999	20.979	-8.101		0.00364214	0.465668	0.0549265	0.455515	0.00356272
	28.964	20.971		-7.985		0.00394707	0.504656
	29.313	20.967		-8.334		0.00309896	0.39622

## Sheet: HepG2-7-MYCN
Sample Name	Ct	Ct ref	Ct mean	△ct(-)		2-△ct	2-△△ct	Sd	RQ1
NC-1	25.282	20.296	20.312	-4.97	2	0.0319066	1.02112	0.0415971	1	0.0312467
	25.383	20.253		-5.071		0.0297493	0.95208
	25.274	20.387		-4.962		0.032084	1.0268
NC-2	25.026	20.445	20.426	-4.6		0.0412346	1.31965	0.129501	1.22554	0.038294
	25.071	20.444		-4.645		0.0399683	1.27912
	25.318	20.389		-4.892		0.0336791	1.07785
NC-3	24.95	20.212	20.1183	-4.83167		0.0351175	1.12388	0.0603846	1.06317	0.0332205
	25.114	20.076		-4.99567		0.031344	1.00312
	25.031	20.067		-4.91267		0.0332001	1.06252
SI PAIP1-1	25.955	20.066	20.0267	-5.92833		0.0164208	0.525521	0.052774	0.467431	0.0146057
	26.165	20.052		-6.13833		0.0141964	0.454332
	26.27	19.962		-6.24333		0.0131999	0.422441
SI PAIP1-2	25.858	19.982	20.0007	-5.85733		0.0172491	0.552031	0.0222216	0.527289	0.016476
	25.942	20.031		-5.94133		0.0162735	0.520807
	25.975	19.989		-5.97433		0.0159055	0.509029
SI PAIP1-3	26.628	20.999	20.979	-5.649		0.0199288	0.63779	0.0386344	0.594804	0.0185856
	26.756	20.971		-5.777		0.0182368	0.583641
	26.808	20.967		-5.829		0.0175912	0.562979

## Sheet: HepG2-8-MICAL1
Sample Name	Ct	Ct ref	Ct mean	△ct(-)		2-△ct	2-△△ct	Sd	RQ1
NC-1	26.913	20.296	20.312	-6.601	2	0.0103015	1.0007	0.0370585	1	0.0102943
	26.862	20.253		-6.55		0.0106722	1.03671
	26.969	20.387		-6.657		0.00990931	0.962598
NC-2	26.925	20.445	20.426	-6.499		0.0110562	1.07401	0.0920414	1.1802	0.0121493
	26.73	20.444		-6.304		0.0126563	1.22944
	26.721	20.389		-6.295		0.0127355	1.23714
NC-3	26.685	20.212	20.1183	-6.56667		0.0105496	1.0248	0.150677	1.13902	0.0117255
	26.606	20.076		-6.48767		0.0111434	1.08248
	26.331	20.067		-6.21267		0.0134835	1.30979
SI PAIP1-1	25.866	20.066	20.0267	-5.83933		0.0174657	1.69663	0.0503856	1.67301	0.0172225
	25.937	20.052		-5.91033		0.0166269	1.61515
	25.857	19.962		-5.83033		0.017575	1.70725
SI PAIP1-2	25.559	19.982	20.0007	-5.55833		0.0212214	2.06147	0.114366	1.97108	0.020291
	25.721	20.031		-5.72033		0.0189674	1.84251
	25.596	19.989		-5.59533		0.0206841	2.00927
SI PAIP1-3	25.467	20.999	20.979	-4.488		0.0445633	4.32892	0.244931	4.06918	0.0418895
	25.568	20.971		-4.589		0.0415502	4.03622
	25.639	20.967		-4.66		0.0395549	3.84239

## Sheet: HepG2-9-IL1RN
Sample Name	Ct	Ct ref	Ct mean	△ct(-)		2-△ct	2-△△ct	Sd	RQ1
NC-1	26.804	20.296	20.312	-6.492	2	0.01111	0.912391	0.0771064	1	0.0121768
	26.629	20.253		-6.317		0.0125428	1.03006
	26.591	20.387		-6.279		0.0128775	1.05755
NC-2	26.458	20.445	20.426	-6.032		0.0152822	1.25503	0.159325	1.22473	0.0149133
	26.335	20.444		-5.909		0.0166423	1.36673
	26.712	20.389		-6.286		0.0128152	1.05243
NC-3	26.875	20.212	20.1183	-6.75667		0.00924785	0.759467	0.0501291	0.785477	0.00956456
	26.724	20.076		-6.60567		0.0102682	0.843265
	26.886	20.067		-6.76767		0.00917761	0.753699
SI PAIP1-1	27.981	20.066	20.0267	-7.95433		0.00403187	0.331112	0.0373051	0.369168	0.00449527
	27.818	20.052		-7.79133		0.00451414	0.370717
	27.688	19.962		-7.66133		0.0049398	0.405674
SI PAIP1-2	27.782	19.982	20.0007	-7.78133		0.00454554	0.373296	0.0268803	0.345629	0.00420864
	27.9	20.031		-7.89933		0.00418855	0.343979
	28.006	19.989		-8.00533		0.00389184	0.319612
SI PAIP1-3	28.916	20.999	20.979	-7.937		0.00408061	0.335114	0.135226	0.406835	0.00495394
	28.971	20.971		-7.992		0.00392797	0.322579
	28.168	20.967		-7.189		0.00685323	0.562813

[truncated: 19 more sheets: HepG2-10-CDKN2A, HepG2-11-IL18, HepG2-12-TPM4, HepG2-13-PTAFR, HepG2-14-AKR1C1, HepG2-15-PLA2G2A, HepG2-16-MT1F, HepG2-17-SERPINA3, HepG2-18-CCL14, Huh7-1-COL9A2, Huh7-2-DKK1, Huh7-3-CCND1, Huh7-4-MYCN, Huh7-5-MICAL1, Huh7-6-CDKN2A, Huh7-7-TPM4, Huh7-8-AKR1C1, Huh7-9-PLA2G2A, Huh7-10-MT1F]
